# Supplementary material for: Exosomes isolated from cancer patients’ sera transfer malignant traits and confer the same phenotype of primary tumors to oncosuppressor-mutated cells
Source: Springer Nature journal article supplement (doi:10.1186/s13046-017-0587-0), 2017-08-30
Supplement: MOESM1 [file 14956656]

**Supplementary Table1. List of antibodies used in this study.**

| Antibodies ID | Species           | Manufacturer      | Dilutions used          |
|---------------|-------------------|-------------------|-------------------------|
| Ki67          | Rabbit Monoclonal | Ventana (USA)     | Dispenser (Pre-diluted) |
| CEA-P         | Rabbit Polyclonal | DAKO (Denmark)    | 1:5000                  |
| CK7           | Mouse Monoclonal  | DAKO (Denmark)    | 1:2000                  |
| CK20          | Mouse Monoclonal  | DAKO (Denmark)    | 1:1000                  |
| CDX-2         | Rabbit Monoclonal | Cell MARQUE (USA) | Dispenser (Pre-diluted) |
| AE1/AE3       | Mouse Monoclonal  | DAKO (Denmark)    | 1:30                    |
| Vimentin      | Mouse Monoclonal  | Ventana (USA)     | Dispenser (Pre-diluted) |
| CK8-CK18      | Mouse Monoclonal  | DAKO (Denmark)    | Dispenser (Pre-diluted) |
| HEP-PAR1      | Mouse Monoclonal  | Ventana (USA)     | 1:50                    |
| AFP           | Mouse Monoclonal  | Cell MARQUE (USA) | Dispenser (Pre-diluted) |
| CK19          | Mouse Monoclonal  | DAKO (Denmark)    | Dispenser (Pre-diluted) |
| PAX8          | Rabbit Polyclonal | DAKO (Denmark)    | Dispenser (Pre-diluted) |
| EMA           | Rabbit Polyclonal | DAKO (Denmark)    | 1:250                   |
| WT1           | Mouse Monoclonal  | DAKO (Denmark)    | Dispenser (Pre-diluted) |
| p53           | Mouse Monoclonal  | DAKO (Denmark)    | Dispenser (Pre-diluted) |
