# Supplementary material for: Exosomes isolated from cancer patients’ sera transfer malignant traits and confer the same phenotype of primary tumors to oncosuppressor-mutated cells
Source: Springer Nature journal article supplement (doi:10.1186/s13046-017-0587-0), 2017-08-30
Supplement: MOESM2 [file 14956656]

**Supplementary Table 2. MS data from the plasma membrane as visualized on Scaffold Q+.**

| Identified Proteins                                                                                  | Alternate Name        | MW      | T-Test (p-value) | Quantitative Profile  | Control |    |    | BRCA1-KO |    |    |
|------------------------------------------------------------------------------------------------------|-----------------------|---------|------------------|-----------------------|---------|----|----|----------|----|----|
|                                                                                                      |                       |         |                  |                       | 1       | 2  | 3  | 1        | 2  | 3  |
| 1-phosphatidylinositol 4,5-bisphosphate phosphodiesterase beta-3 OS=Homo sapiens GN=PLCB3 PE=1 SV=2  | PLCB3_HUMAN           | 139 kDa | 0.0032           | BRAC1 high, Naive low | 0       | 0  | 0  | 13       | 15 | 11 |
| 1-phosphatidylinositol 4,5-bisphosphate phosphodiesterase delta-3 OS=Homo sapiens GN=PLCD3 PE=1 SV=3 | PLCD3_HUMAN           | 89 kDa  | 0.0082           | BRAC1 high, Naive low | 0       | 0  | 0  | 8        | 6  | 5  |
| 2',3'-cyclic-nucleotide 3'-phosphodiesterase OS=Homo sapiens GN=CNP PE=3 SV=1                        | A0A024R1T5_HUMAN (+1) | 45 kDa  | 0.054            | []                    | 3       | 6  | 6  | 17       | 18 | 13 |
| 2'-5'-oligoadenylate synthase 2 OS=Homo sapiens GN=OAS2 PE=1 SV=1                                    | A0A087X0V5_HUMAN (+1) | 83 kDa  | 0.72             | []                    | 0       | 0  | 4  | 1        | 2  | 5  |
| 2'-5'-oligoadenylate synthetase 3, 100kDa, isoform CRA_a OS=Homo sapiens GN=OAS3 PE=4 SV=1           | A0A024RBQ5_HUMAN (+2) | 121 kDa | 0.088            | []                    | 0       | 1  | 2  | 3        | 4  | 10 |
| 2,4-dienoyl CoA reductase 1, mitochondrial, isoform CRA_b OS=Homo sapiens GN=DECR1 PE=4 SV=1         | A0A024R9D7_HUMAN (+1) | 36 kDa  | 0.00047          | BRAC1 low, Naive high | 3       | 3  | 4  | 1        | 1  | 1  |
| 2-oxoglutarate dehydrogenase, mitochondrial OS=Homo sapiens GN=OGDH PE=1 SV=3                        | ODO1_HUMAN            | 116 kDa | 0.42             | []                    | 0       | 3  | 6  | 2        | 1  | 4  |
| 3-beta-hydroxysteroid-Delta(8),Delta(7)-isomerase OS=Homo sapiens GN=EBP PE=1 SV=3                   | EBP_HUMAN (+1)        | 26 kDa  | 0.37             | []                    | 0       | 0  | 0  | 0        | 0  | 4  |
| 3-hydroxyacyl-CoA dehydrogenase type-2 OS=Homo sapiens GN=HSD17B10 PE=1 SV=3                         | HCD2_HUMAN            | 27 kDa  | 0.92             | []                    | 2       | 3  | 2  | 5        | 2  | 5  |
| 3-hydroxyisobutyrate dehydrogenase, mitochondrial OS=Homo sapiens GN=HIBADH PE=1 SV=2                | 3HIDH_HUMAN (+1)      | 35 kDa  | 0.063            | []                    | 1       | 3  | 3  | 0        | 2  | 1  |
| 3-ketoacyl-CoA thiolase, mitochondrial OS=Homo sapiens GN=ACAA2 PE=1 SV=2                            | THIM_HUMAN (+3)       | 42 kDa  | 0.4              | []                    | 2       | 1  | 4  | 0        | 1  | 6  |
| 3-mercaptopurinate sulfortransferase OS=Homo sapiens GN=MPST PE=1 SV=3                               | THTM_HUMAN            | 33 kDa  | 0.37             | []                    | 0       | 0  | 0  | 0        | 0  | 3  |
| 4-hydroxyphenylpyruvate dioxygenase-like protein OS=Homo sapiens GN=HPDL PE=1 SV=1                   | HPDL_HUMAN            | 39 kDa  | 0.37             | []                    | 0       | 0  | 0  | 0        | 2  | 0  |
| 4-trimethylaminobutylaldehyde dehydrogenase OS=Homo sapiens GN=ALDH9A1 PE=1 SV=3                     | AL9A1_HUMAN (+1)      | 54 kDa  | 0.37             | []                    | 0       | 0  | 2  | 0        | 0  | 0  |
| 4F2 cell-surface antigen heavy chain OS=Homo sapiens GN=SLC3A2 PE=1 SV=3                             | 4F2_HUMAN (+2)        | 68 kDa  | 0.22             | []                    | 8       | 14 | 23 | 54       | 38 | 26 |
| 5'-AMP-activated protein kinase catalytic subunit alpha-1 OS=Homo sapiens GN=PRKAA1 PE=1 SV=4        | AAPK1_HUMAN           | 64 kDa  | 0.17             | []                    | 0       | 0  | 0  | 1        | 0  | 3  |
| 5'-AMP-activated protein kinase subunit gamma-1 OS=Homo sapiens GN=PRKAG1 PE=1 SV=1                  | AAKG1_HUMAN (+2)      | 38 kDa  | 0.37             | []                    | 0       | 0  | 0  | 0        | 0  | 2  |
| 5'-nucleotidase OS=Homo sapiens GN=NT5E PE=1 SV=1                                                    | 5NTD_HUMAN (+3)       | 63 kDa  | 0.021            | BRAC1 low, Naive high | 13      | 16 | 12 | 9        | 7  | 9  |
| 6-phosphogluconate dehydrogenase, decarboxylating OS=Homo sapiens GN=PGD PE=1 SV=3                   | 6PGD_HUMAN            | 53 kDa  | 0.93             | []                    | 1       | 1  | 7  | 3        | 3  | 7  |
| 6-phosphogluconate dehydrogenase, decarboxylating OS=Homo sapiens PE=2 SV=1                          | B4DL86_HUMAN          | 47 kDa  | 0.57             | []                    | 0       | 0  | 5  | 2        | 4  | 5  |
| 6-phosphogluconolactonase OS=Homo sapiens GN=PGLS PE=1 SV=2                                          | 6PGL_HUMAN (+3)       | 28 kDa  | 0.22             | []                    | 1       | 1  | 1  | 1        | 1  | 2  |
| 7-dehydrocholesterol reductase, isoform CRA_a OS=Homo sapiens GN=DHCR7 PE=4 SV=1                     | A0A024R5F7_HUMAN (+2) | 54 kDa  | 0.001            | BRAC1 high, Naive low | 0       | 0  | 0  | 2        | 3  | 3  |
| 10 kDa heat shock protein, mitochondrial OS=Homo sapiens GN=HSPE1 PE=1 SV=2                          | CH10_HUMAN (+1)       | 11 kDa  | 0.93             | []                    | 2       | 2  | 0  | 4        | 2  | 1  |
| 14-3-3 protein beta/alpha OS=Homo sapiens GN=YWHAB PE=1 SV=3                                         | 1433B_HUMAN (+1)      | 28 kDa  | 0.052            | []                    | 1       | 0  | 7  | 12       | 11 | 12 |
| 14-3-3 protein epsilon OS=Homo sapiens GN=YWHAE PE=1 SV=1                                            | 1433E_HUMAN (+1)      | 29 kDa  | 0.14             | []                    | 1       | 2  | 8  | 15       | 10 | 10 |
| 14-3-3 protein eta OS=Homo sapiens GN=YWHAH PE=1 SV=4                                                | 1433F_HUMAN (+1)      | 28 kDa  | 0.38             | []                    | 2       | 2  | 7  | 3        | 3  | 6  |
| 14-3-3 protein gamma OS=Homo sapiens GN=YWHAG PE=1 SV=2                                              | 1433G_HUMAN (+2)      | 28 kDa  | 0.083            | []                    | 0       | 0  | 5  | 6        | 7  | 9  |
| 14-3-3 protein sigma OS=Homo sapiens GN=SFN PE=1 SV=1                                                | 1433S_HUMAN           | 28 kDa  | 0.12             | []                    | 0       | 0  | 0  | 0        | 2  | 3  |
| 14-3-3 protein theta OS=Homo sapiens GN=YWHAQ PE=1 SV=1                                              | 1433T_HUMAN           | 28 kDa  | 0.85             | []                    | 1       | 1  | 7  | 4        | 4  | 7  |
| 14-3-3 protein zeta/delta OS=Homo sapiens GN=YWHAZ PE=1 SV=1                                         | 1433Z_HUMAN (+1)      | 28 kDa  | 0.35             | []                    | 6       | 5  | 8  | 17       | 17 | 9  |
| 26S protease regulatory subunit 4 OS=Homo sapiens GN=PSMC1 PE=1 SV=1                                 | PRS4_HUMAN (+2)       | 49 kDa  | 0.55             | []                    | 0       | 0  | 1  | 0        | 0  | 5  |
| 26S protease regulatory subunit 6B OS=Homo sapiens GN=PSMC4 PE=1 SV=2                                | PRS6B_HUMAN (+1)      | 47 kDa  | 0.37             | []                    | 0       | 0  | 0  | 0        | 0  | 12 |
| 26S protease regulatory subunit 7 OS=Homo sapiens GN=PSMC2 PE=1 SV=3                                 | PRS7_HUMAN (+1)       | 49 kDa  | 0.8              | []                    | 1       | 1  | 1  | 0        | 1  | 4  |
| 26S protease regulatory subunit 8 OS=Homo sapiens GN=PSMC5 PE=1 SV=1                                 | PRS8_HUMAN (+1)       | 46 kDa  | 0.31             | []                    | 1       | 1  | 3  | 0        | 0  | 4  |
| 26S protease regulatory subunit 10B OS=Homo sapiens GN=PSMC6 PE=1 SV=1                               | PRS10_HUMAN (+2)      | 44 kDa  | 0.8              | []                    | 1       | 0  | 1  | 0        | 1  | 4  |
| 26S proteasome non-ATPase regulatory subunit 1 OS=Homo sapiens GN=PSMD1 PE=1 SV=2                    | PSMD1_HUMAN (+1)      | 106 kDa | 0.51             | []                    | 0       | 0  | 1  | 0        | 0  | 6  |
| 26S proteasome non-ATPase regulatory subunit 2 (Fragment) OS=Homo sapiens GN=PSMD2 PE=1 SV=1         | H7C1H2_HUMAN          | 22 kDa  | 0.37             | []                    | 0       | 0  | 0  | 0        | 0  | 7  |
| 26S proteasome non-ATPase regulatory subunit 2 OS=Homo sapiens GN=PSMD2 PE=1 SV=3                    | PSMD2_HUMAN (+1)      | 100 kDa | 0.42             | []                    | 0       | 1  | 4  | 2        | 2  | 17 |
| 26S proteasome non-ATPase regulatory subunit 5 OS=Homo sapiens GN=PSMD5 PE=1 SV=3                    | PSMD5_HUMAN (+1)      | 56 kDa  | 0.37             | []                    | 0       | 0  | 1  | 0        | 1  | 7  |
| 26S proteasome non-ATPase regulatory subunit 6 OS=Homo sapiens GN=PSMD6 PE=1 SV=1                    | PSMD6_HUMAN           | 46 kDa  | 0.69             | []                    | 0       | 0  | 2  | 0        | 0  | 6  |
| 26S proteasome non-ATPase regulatory subunit 11 OS=Homo sapiens GN=PSMD11 PE=1 SV=3                  | PSD11_HUMAN           | 47 kDa  | 0.55             | []                    | 0       | 0  | 1  | 0        | 0  | 5  |
| 26S proteasome non-ATPase regulatory subunit 12 OS=Homo sapiens GN=PSMD12 PE=1 SV=3                  | PSD12_HUMAN           | 53 kDa  | 0.24             | []                    | 0       | 0  | 1  | 1        | 1  | 7  |
| 40S ribosomal protein S3 OS=Homo sapiens GN=RPS3 PE=1 SV=2                                           | RS3_HUMAN             | 27 kDa  | 0.41             | []                    | 2       | 3  | 9  | 4        | 3  | 8  |
| 40S ribosomal protein S3a OS=Homo sapiens GN=RPS3A PE=2 SV=1                                         | A8K4W0_HUMAN (+3)     | 30 kDa  | 0.91             | []                    | 1       | 3  | 4  | 3        | 3  | 8  |
| 40S ribosomal protein S4 OS=Homo sapiens GN=RPS4X PE=2 SV=1                                          | B2R491_HUMAN (+3)     | 30 kDa  | 0.81             | []                    | 0       | 3  | 7  | 4        | 3  | 11 |
| 40S ribosomal protein S6 OS=Homo sapiens GN=RPS6 PE=1 SV=1                                           | A2A3R5_HUMAN          | 25 kDa  | 0.067            | []                    | 3       | 3  | 3  | 3        | 1  | 4  |
| 40S ribosomal protein S7 OS=Homo sapiens GN=RPS7 PE=1 SV=1                                           | B5MCP9_HUMAN (+1)     | 21 kDa  | 0.86             | []                    | 0       | 3  | 2  | 2        | 3  | 4  |
| 40S ribosomal protein S8 OS=Homo sapiens GN=RPS8 PE=2 SV=1                                           | Q5JR94_HUMAN (+2)     | 24 kDa  | 0.43             | []                    | 5       | 4  | 4  | 5        | 5  | 9  |
| 40S ribosomal protein S9 OS=Homo sapiens GN=RPS9 PE=1 SV=1                                           | A0A024R4M0_HUMAN (+1) | 23 kDa  | 0.95             | []                    | 1       | 1  | 3  | 2        | 2  | 4  |
| 40S ribosomal protein S10 OS=Homo sapiens GN=RPS10 PE=1 SV=1                                         | RS10_HUMAN            | 19 kDa  | 0.86             | []                    | 0       | 0  | 3  | 1        | 1  | 3  |
| 40S ribosomal protein S11 OS=Homo sapiens GN=RPS11 PE=1 SV=3                                         | RS11_HUMAN            | 18 kDa  | 0.28             | []                    | 1       | 1  | 4  | 1        | 2  | 2  |
| 40S ribosomal protein S12 OS=Homo sapiens GN=RPS12 PE=1 SV=3                                         | RS12_HUMAN            | 15 kDa  | 0.4              | []                    | 0       | 1  | 0  | 2        | 2  | 0  |
| 40S ribosomal protein S13 OS=Homo sapiens GN=RPS13 PE=1 SV=1                                         | J3KMX5_HUMAN (+1)     | 17 kDa  | 0.05             | BRAC1 high, Naive low | 0       | 0  | 2  | 3        | 3  | 4  |
| 40S ribosomal protein S14 OS=Homo sapiens GN=RPS14 PE=1 SV=3                                         | RS14_HUMAN            | 16 kDa  | 0.46             | []                    | 2       | 3  | 1  | 3        | 3  | 1  |
| 40S ribosomal protein S18 OS=Homo sapiens GN=RPS18 PE=1 SV=3                                         | RS18_HUMAN            | 18 kDa  | 0.73             | []                    | 4       | 2  | 1  | 4        | 5  | 1  |
| 40S ribosomal protein S20 OS=Homo sapiens GN=RPS20 PE=1 SV=1                                         | RS20_HUMAN            | 13 kDa  | 0.57             | []                    | 0       | 1  | 2  | 3        | 2  | 1  |
| 40S ribosomal protein S23 OS=Homo sapiens GN=RPS23 PE=1 SV=3                                         | RS23_HUMAN (+1)       | 16 kDa  | 0.21             | []                    | 1       | 1  | 1  | 0        | 1  | 2  |
| 40S ribosomal protein SA OS=Homo sapiens GN=RPSA PE=3 SV=1                                           | A0A024R2P0_HUMAN (+3) | 33 kDa  | 0.2              | []                    | 5       | 7  | 6  | 8        | 8  | 8  |

|                                                                                                        |                       |         |         |                       |    |    |    |    |    |    |
|--------------------------------------------------------------------------------------------------------|-----------------------|---------|---------|-----------------------|----|----|----|----|----|----|
| 60S ribosomal protein L3 OS=Homo sapiens GN=RPL3 PE=1 SV=2                                             | RL3_HUMAN             | 46 kDa  | 0.42    | []                    | 2  | 3  | 5  | 3  | 2  | 8  |
| 60S ribosomal protein L4 OS=Homo sapiens GN=RPL4 PE=1 SV=5                                             | RL4_HUMAN             | 48 kDa  | 0.13    | []                    | 9  | 12 | 12 | 13 | 14 | 20 |
| 60S ribosomal protein L6 OS=Homo sapiens GN=RPL6 PE=3 SV=1                                             | A0A024RBK3_HUMAN (+4) | 33 kDa  | 0.12    | []                    | 4  | 9  | 10 | 14 | 16 | 21 |
| 60S ribosomal protein L7a OS=Homo sapiens GN=RPL7A PE=1 SV=2                                           | RL7A_HUMAN            | 30 kDa  | 0.61    | []                    | 5  | 7  | 7  | 9  | 11 | 15 |
| 60S ribosomal protein L8 (Fragment) OS=Homo sapiens GN=RPL8 PE=1 SV=1                                  | E9PKZ0_HUMAN (+1)     | 22 kDa  | 0.29    | []                    | 1  | 4  | 3  | 2  | 2  | 4  |
| 60S ribosomal protein L9 (Fragment) OS=Homo sapiens GN=RPL9 PE=1 SV=6                                  | D6RAN4_HUMAN (+2)     | 21 kDa  | 0.34    | []                    | 0  | 0  | 4  | 2  | 3  | 8  |
| 60S ribosomal protein L10a OS=Homo sapiens GN=RPL10A PE=1 SV=2                                         | RL10A_HUMAN (+1)      | 25 kDa  | 0.91    | []                    | 0  | 0  | 2  | 0  | 2  | 1  |
| 60S ribosomal protein L12 OS=Homo sapiens GN=RPL12 PE=1 SV=1                                           | RL12_HUMAN            | 18 kDa  | 0.14    | []                    | 2  | 4  | 3  | 3  | 3  | 4  |
| 60S ribosomal protein L13 OS=Homo sapiens GN=RPL13 PE=2 SV=1                                           | A8K4C8_HUMAN (+2)     | 24 kDa  | 0.11    | []                    | 2  | 3  | 2  | 1  | 1  | 4  |
| 60S ribosomal protein L14 OS=Homo sapiens GN=RPL14 PE=1 SV=4                                           | RL14_HUMAN            | 23 kDa  | 0.18    | []                    | 2  | 2  | 4  | 2  | 4  | 3  |
| 60S ribosomal protein L18a OS=Homo sapiens PE=2 SV=1                                                   | B2R4C0_HUMAN (+5)     | 21 kDa  | 0.11    | []                    | 2  | 1  | 2  | 1  | 1  | 2  |
| 60S ribosomal protein L23a OS=Homo sapiens GN=RPL23A PE=1 SV=1                                         | A8MUS3_HUMAN (+5)     | 22 kDa  | 0.077   | []                    | 0  | 1  | 1  | 2  | 2  | 4  |
| 60S ribosomal protein L26-like 1 OS=Homo sapiens GN=RPL26L1 PE=1 SV=1                                  | RL26L_HUMAN (+8)      | 17 kDa  | 0.87    | []                    | 0  | 0  | 1  | 0  | 0  | 2  |
| 60S ribosomal protein L27a OS=Homo sapiens GN=RPL27A PE=1 SV=1                                         | E9PLL6_HUMAN (+3)     | 12 kDa  | 0.8     | []                    | 1  | 0  | 1  | 2  | 1  | 1  |
| 60S ribosomal protein L28 OS=Homo sapiens GN=RPL28 PE=1 SV=1                                           | H0YKD8_HUMAN (+3)     | 19 kDa  | 0.69    | []                    | 1  | 2  | 0  | 3  | 3  | 1  |
| 60S ribosomal protein L38 OS=Homo sapiens GN=RPL38 PE=1 SV=2                                           | RL38_HUMAN (+4)       | 8 kDa   | 0.66    | []                    | 1  | 1  | 0  | 0  | 1  | 2  |
| 78 kDa glucose-regulated protein OS=Homo sapiens GN=HSPA5 PE=1 SV=2                                    | GRP78_HUMAN (+1)      | 72 kDa  | 0.1     | []                    | 54 | 56 | 53 | 52 | 49 | 90 |
| 116 kDa U5 small nuclear ribonucleoprotein component OS=Homo sapiens GN=EFTUD2 PE=1 SV=1               | U5S1_HUMAN (+4)       | 109 kDa | 0.37    | []                    | 0  | 0  | 0  | 0  | 0  | 6  |
| A-kinase anchor protein 12 OS=Homo sapiens GN=AKAP12 PE=1 SV=4                                         | AKA12_HUMAN           | 191 kDa | 0.16    | []                    | 2  | 5  | 0  | 0  | 0  | 0  |
| ADAM metalloproteinase domain 10, isoform CRA_b OS=Homo sapiens GN=ADAM10 PE=4 SV=1                    | A0A024R5U5_HUMAN (+1) | 84 kDa  | 0.011   | BRAC1 high, Naive low | 1  | 0  | 1  | 12 | 10 | 8  |
| ADP-dependent glucokinase OS=Homo sapiens GN=ADPGK PE=1 SV=1                                           | ADPGK_HUMAN (+1)      | 54 kDa  | 0.37    | []                    | 0  | 0  | 0  | 0  | 0  | 2  |
| ADP-ribosyl cyclase/cyclic ADP-ribose hydrolase 2 OS=Homo sapiens GN=BST1 PE=1 SV=2                    | BST1_HUMAN (+1)       | 36 kDa  | 0.017   | BRAC1 low, Naive high | 1  | 1  | 3  | 0  | 0  | 0  |
| ADP-ribosylation factor 3, isoform CRA_b OS=Homo sapiens GN=ARF3 PE=3 SV=1                             | A0A024R0Y6_HUMAN (+5) | 21 kDa  | 0.27    | []                    | 0  | 0  | 2  | 2  | 2  | 2  |
| ADP-ribosylation factor 4 OS=Homo sapiens GN=ARF4 PE=1 SV=3                                            | ARF4_HUMAN (+1)       | 21 kDa  | 0.43    | []                    | 0  | 0  | 2  | 2  | 2  | 1  |
| ADP-ribosylation factor 6 OS=Homo sapiens GN=ARF6 PE=1 SV=2                                            | ARF6_HUMAN (+1)       | 20 kDa  | 0.25    | []                    | 1  | 0  | 0  | 2  | 3  | 1  |
| ADP-ribosylation factor GTPase-activating protein 1 OS=Homo sapiens GN=ARFGAP1 PE=1 SV=2               | ARFG1_HUMAN (+5)      | 45 kDa  | 0.17    | []                    | 0  | 0  | 0  | 1  | 0  | 3  |
| ADP-ribosylation factor GTPase-activating protein 2 OS=Homo sapiens GN=ARFGAP2 PE=1 SV=1               | ARFG2_HUMAN (+3)      | 57 kDa  | 0.37    | []                    | 0  | 0  | 0  | 0  | 0  | 3  |
| ADP/ATP translocase 1 OS=Homo sapiens GN=SLC25A4 PE=1 SV=4                                             | ADT1_HUMAN (+1)       | 33 kDa  | 0.96    | []                    | 3  | 0  | 3  | 4  | 3  | 3  |
| ADP/ATP translocase 2 OS=Homo sapiens GN=SLC25A5 PE=1 SV=7                                             | ADT2_HUMAN            | 33 kDa  | 0.025   | BRAC1 high, Naive low | 3  | 2  | 3  | 7  | 9  | 10 |
| ADP/ATP translocase 3 OS=Homo sapiens GN=SLC25A6 PE=1 SV=4                                             | ADT3_HUMAN (+1)       | 33 kDa  | 0.32    | []                    | 4  | 2  | 4  | 4  | 4  | 4  |
| AFG3-like protein 2 OS=Homo sapiens GN=AFG3L2 PE=1 SV=2                                                | AFG32_HUMAN (+2)      | 89 kDa  | 0.87    | []                    | 0  | 0  | 1  | 0  | 0  | 2  |
| AGTRAP-BRAF fusion protein OS=Homo sapiens PE=2 SV=1                                                   | D7RF68_HUMAN          | 66 kDa  | 0.66    | []                    | 1  | 1  | 0  | 1  | 0  | 2  |
| AH receptor-interacting protein OS=Homo sapiens GN=AIP PE=1 SV=2                                       | AIP_HUMAN (+13)       | 38 kDa  | 0.37    | []                    | 0  | 0  | 0  | 0  | 0  | 3  |
| AP-1 complex subunit gamma-1 OS=Homo sapiens GN=AP1G1 PE=1 SV=5                                        | AP1G1_HUMAN (+2)      | 91 kDa  | 0.07    | []                    | 0  | 0  | 0  | 1  | 1  | 4  |
| AP-1 complex subunit mu-2 OS=Homo sapiens GN=AP1M2 PE=1 SV=4                                           | AP1M2_HUMAN (+2)      | 48 kDa  | 0.00029 | BRAC1 high, Naive low | 0  | 0  | 0  | 2  | 2  | 2  |
| AP-2 complex subunit alpha-1 OS=Homo sapiens GN=AP2A1 PE=1 SV=3                                        | AP2A1_HUMAN           | 108 kDa | 0.034   | BRAC1 low, Naive high | 6  | 6  | 10 | 8  | 8  | 6  |
| AP-2 complex subunit alpha-2 OS=Homo sapiens GN=AP2A2 PE=1 SV=2                                        | AP2A2_HUMAN (+1)      | 104 kDa | 0.86    | []                    | 3  | 4  | 7  | 9  | 7  | 5  |
| AP-1 complex subunit beta-1 OS=Homo sapiens GN=AP1B1 PE=1 SV=2                                         | AP1B1_HUMAN           | 105 kDa | 0.032   | BRAC1 high, Naive low | 3  | 2  | 3  | 9  | 15 | 12 |
| AP-2 complex subunit beta OS=Homo sapiens GN=AP2B1 PE=1 SV=1                                           | A0A087X253_HUMAN (+4) | 101 kDa | 0.7     | []                    | 8  | 10 | 9  | 12 | 20 | 7  |
| AP-2 complex subunit mu OS=Homo sapiens GN=AP2M1 PE=1 SV=1                                             | A0A087WY71_HUMAN (+4) | 50 kDa  | 0.55    | []                    | 0  | 0  | 2  | 0  | 0  | 1  |
| AP-3 complex subunit beta-1 OS=Homo sapiens GN=AP3B1 PE=1 SV=3                                         | AP3B1_HUMAN (+2)      | 121 kDa | 0.69    | []                    | 0  | 0  | 1  | 0  | 0  | 3  |
| ARHG protein (Fragment) OS=Homo sapiens GN=ARHG PE=2 SV=1                                              | Q6ICQ8_HUMAN (+1)     | 21 kDa  | 0.17    | []                    | 2  | 2  | 2  | 7  | 6  | 4  |
| ARP3 actin-related protein 3 homolog (Yeast), isoform CRA_a OS=Homo sapiens GN=ACTR3 PE=3 SV=1         | A0A024RAI1_HUMAN (+1) | 47 kDa  | 0.54    | []                    | 6  | 10 | 12 | 25 | 19 | 11 |
| ATP synthase subunit O, mitochondrial OS=Homo sapiens GN=ATP5O PE=1 SV=1                               | ATPO_HUMAN            | 23 kDa  | 0.2     | []                    | 6  | 5  | 5  | 6  | 7  | 5  |
| ATP synthase subunit alpha, mitochondrial OS=Homo sapiens GN=ATP5A1 PE=1 SV=1                          | ATPA_HUMAN (+1)       | 60 kDa  | 0.14    | []                    | 31 | 27 | 18 | 23 | 22 | 21 |
| ATP synthase subunit beta, mitochondrial OS=Homo sapiens GN=ATP5B PE=1 SV=3                            | ATPB_HUMAN (+1)       | 57 kDa  | 0.017   | BRAC1 low, Naive high | 23 | 22 | 25 | 16 | 20 | 24 |
| ATP synthase subunit g, mitochondrial OS=Homo sapiens GN=ATP5L PE=1 SV=3                               | ATP5L_HUMAN (+1)      | 11 kDa  | 0.54    | []                    | 2  | 1  | 0  | 1  | 2  | 0  |
| ATP synthase subunit gamma, mitochondrial OS=Homo sapiens GN=ATP5C1 PE=1 SV=1                          | ATPG_HUMAN (+2)       | 33 kDa  | 0.71    | []                    | 0  | 2  | 4  | 2  | 2  | 3  |
| ATP-binding cassette sub-family D member 1 OS=Homo sapiens GN=ABCD1 PE=1 SV=2                          | ABCD1_HUMAN           | 83 kDa  | 0.88    | []                    | 0  | 2  | 0  | 2  | 1  | 1  |
| ATP-binding cassette sub-family D member 3 OS=Homo sapiens GN=ABCD3 PE=1 SV=1                          | ABCD3_HUMAN           | 75 kDa  | 0.28    | []                    | 0  | 1  | 0  | 1  | 1  | 7  |
| ATP-binding cassette sub-family E member 1 OS=Homo sapiens GN=ABCE1 PE=1 SV=1                          | ABCE1_HUMAN (+1)      | 67 kDa  | 0.17    | []                    | 0  | 0  | 0  | 1  | 1  | 7  |
| ATP-binding cassette sub-family F member 1 OS=Homo sapiens GN=ABCF1 PE=1 SV=2                          | ABCF1_HUMAN (+3)      | 96 kDa  | 0.19    | []                    | 0  | 0  | 0  | 2  | 0  | 7  |
| ATP-binding cassette sub-family F member 2 OS=Homo sapiens GN=ABCF2 PE=1 SV=2                          | ABCF2_HUMAN (+2)      | 71 kDa  | 0.13    | []                    | 0  | 0  | 0  | 0  | 1  | 2  |
| ATP-binding cassette, sub-family G (WHITE), member 2, isoform CRA_a OS=Homo sapiens GN=ABCG2 PE=4 SV=1 | A0A024RDD4_HUMAN (+2) | 72 kDa  | 0.0027  | BRAC1 high, Naive low | 0  | 0  | 0  | 1  | 1  | 2  |
| ATP-citrate synthase OS=Homo sapiens GN=ACLY PE=3 SV=1                                                 | A0A024R1T9_HUMAN (+3) | 121 kDa | 0.81    | []                    | 1  | 2  | 9  | 1  | 2  | 13 |
| ATP-dependent 6-phosphofructokinase, liver type OS=Homo sapiens GN=PFKL PE=1 SV=6                      | PFKAL_HUMAN           | 85 kDa  | 0.68    | []                    | 1  | 0  | 3  | 0  | 1  | 11 |
| ATP-dependent 6-phosphofructokinase, muscle type OS=Homo sapiens GN=PFKM PE=1 SV=2                     | PFKAM_HUMAN (+2)      | 85 kDa  | 0.69    | []                    | 0  | 0  | 1  | 0  | 0  | 3  |
| ATP-dependent 6-phosphofructokinase, platelet type OS=Homo sapiens GN=PFKP PE=1 SV=2                   | PFKAP_HUMAN           | 86 kDa  | 0.39    | []                    | 1  | 0  | 4  | 2  | 3  | 14 |
| ATP-dependent RNA helicase A OS=Homo sapiens GN=DHX9 PE=1 SV=4                                         | DHX9_HUMAN            | 141 kDa | 1       | []                    | 0  | 0  | 6  | 0  | 1  | 8  |
| ATP-dependent RNA helicase DDX1 OS=Homo sapiens GN=DDX1 PE=1 SV=1                                      | A0A087X2G1_HUMAN (+3) | 74 kDa  | 0.82    | []                    | 0  | 1  | 3  | 1  | 2  | 4  |
| ATP-dependent RNA helicase DDX3X OS=Homo sapiens GN=DDX3X PE=1 SV=1                                    | A0A0D9SF53_HUMAN (+4) | 81 kDa  | 0.23    | []                    | 1  | 4  | 5  | 6  | 6  | 20 |
| ATPase family AAA domain-containing protein 3A (Fragment) OS=Homo sapiens GN=ATAD3A PE=1 SV=1          | H0Y2W2_HUMAN          | 64 kDa  | 0.2     | []                    | 1  | 3  | 4  | 2  | 2  | 4  |

|                                                                                                                                   |                       |         |         |                       |    |    |     |     |     |    |
|-----------------------------------------------------------------------------------------------------------------------------------|-----------------------|---------|---------|-----------------------|----|----|-----|-----|-----|----|
| ATPase family AAA domain-containing protein 3A OS=Homo sapiens GN=ATAD3A PE=1 SV=2                                                | ATD3A_HUMAN           | 71 kDa  | 0.38    | []                    | 1  | 4  | 3   | 2   | 2   | 5  |
| ATPase, H+ transporting, lysosomal 42kDa, V1 subunit C1, isoform CRA_a OS=Homo sapiens GN=ATP6V1C1 PE=4 SV=1                      | A0A024R9I0_HUMAN (+1) | 44 kDa  | 0.9     | []                    | 0  | 1  | 1   | 1   | 0   | 2  |
| Abl interactor 1 OS=Homo sapiens GN=ABI1 PE=1 SV=1                                                                                | A0A0A0MRT6_HUMAN (+5) | 52 kDa  | 0.16    | []                    | 1  | 0  | 0   | 2   | 2   | 2  |
| Acetyl-CoA acetyltransferase, cytosolic OS=Homo sapiens GN=ACAT2 PE=1 SV=2                                                        | THIC_HUMAN (+2)       | 41 kDa  | 0.37    | []                    | 0  | 0  | 0   | 0   | 0   | 3  |
| Acetyl-CoA acetyltransferase, mitochondrial OS=Homo sapiens GN=ACAT1 PE=1 SV=1                                                    | THIL_HUMAN            | 45 kDa  | 0.038   | BRAC1 low, Naive high | 2  | 3  | 2   | 2   | 0   | 1  |
| Acetyl-Coenzyme A acyltransferase 1 (Peroxisomal 3-oxoacyl-Coenzyme A thiolase), isoform CRA_a OS=Homo sapiens GN=ACAA1 PE=1 SV=1 | A0A024R2M6_HUMAN (+1) | 44 kDa  | 0.51    | []                    | 3  | 3  | 2   | 4   | 3   | 5  |
| Acetyl-coenzyme A synthetase 2-like, mitochondrial OS=Homo sapiens GN=ACCS1 PE=1 SV=2                                             | ACS2L_HUMAN (+2)      | 75 kDa  | 0.13    | []                    | 0  | 0  | 0   | 0   | 1   | 2  |
| Acetyltransferase component of pyruvate dehydrogenase complex OS=Homo sapiens GN=DLAT PE=3 SV=1                                   | A0A024R3D8_HUMAN (+3) | 69 kDa  | 0.49    | []                    | 0  | 1  | 1   | 1   | 1   | 3  |
| Actin related protein 2/3 complex, subunit 1B, 41kDa OS=Homo sapiens GN=ARPC1B PE=2 SV=1                                          | A4D275_HUMAN (+1)     | 41 kDa  | 0.63    | []                    | 3  | 4  | 9   | 9   | 5   | 8  |
| Actin-binding LIM protein 1 OS=Homo sapiens GN=ABLIM1 PE=1 SV=1                                                                   | A0A0A0MRL6_HUMAN (+4) | 84 kDa  | 0.16    | []                    | 0  | 0  | 0   | 1   | 2   | 0  |
| ACTA2 protein (Fragment) OS=Homo sapiens GN=ACTA2 PE=3 SV=1                                                                       | Q13707_HUMAN          | 37 kDa  | 0.27    | []                    | 35 | 31 | 30  | 48  | 39  | 20 |
| Actin-like protein (Fragment) OS=Homo sapiens GN=ACT PE=3 SV=1                                                                    | Q562P8_HUMAN (+2)     | 12 kDa  | 0.37    | []                    | 0  | 0  | 6   | 0   | 0   | 0  |
| Actin-like protein (Fragment) OS=Homo sapiens GN=ACT PE=3 SV=1                                                                    | Q562N4_HUMAN          | 12 kDa  | 0.37    | []                    | 0  | 0  | 16  | 0   | 0   | 0  |
| Actin-like protein (Fragment) OS=Homo sapiens GN=ACT PE=3 SV=1                                                                    | Q562S0_HUMAN          | 12 kDa  | 0.11    | []                    | 29 | 22 | 32  | 32  | 30  | 21 |
| Actin-like protein (Fragment) OS=Homo sapiens GN=ACT PE=3 SV=1                                                                    | Q562M5_HUMAN          | 12 kDa  | 0.2     | []                    | 0  | 16 | 24  | 0   | 0   | 13 |
| Actin-like protein (Fragment) OS=Homo sapiens GN=ACT PE=3 SV=1                                                                    | Q562U2_HUMAN          | 11 kDa  | 0.5     | []                    | 0  | 9  | 0   | 0   | 20  | 15 |
| Actin-like protein (Fragment) OS=Homo sapiens GN=ACT PE=3 SV=1                                                                    | Q562Z4_HUMAN          | 12 kDa  | 0.37    | []                    | 0  | 7  | 0   | 0   | 0   | 0  |
| Beta actin (Fragment) OS=Homo sapiens PE=4 SV=1                                                                                   | K4ENJ5_HUMAN (+2)     | 11 kDa  | 0.33    | []                    | 19 | 17 | 0   | 0   | 21  | 0  |
| Beta-actin-like protein 2 OS=Homo sapiens GN=ACTBL2 PE=1 SV=2                                                                     | ACTBL_HUMAN           | 42 kDa  | 0.11    | []                    | 21 | 31 | 30  | 30  | 36  | 17 |
| Epididymis luminal protein 176 OS=Homo sapiens GN=HEL-176 PE=2 SV=1                                                               | V9HVZ7_HUMAN          | 25 kDa  | 0.037   | BRAC1 low, Naive high | 48 | 47 | 55  | 54  | 47  | 38 |
| POTE ankyrin domain family member F OS=Homo sapiens GN=POTEF PE=1 SV=2                                                            | POTEF_HUMAN           | 121 kDa | 0.26    | []                    | 45 | 40 | 46  | 62  | 60  | 33 |
| POTE ankyrin domain family member I OS=Homo sapiens GN=POTEI PE=3 SV=1                                                            | POTEI_HUMAN           | 121 kDa | 0.31    | []                    | 28 | 25 | 31  | 43  | 41  | 23 |
| Actin, aortic smooth muscle OS=Homo sapiens GN=ACTA2 PE=1 SV=1                                                                    | ACTA_HUMAN (+1)       | 42 kDa  | 0.17    | []                    | 43 | 40 | 45  | 58  | 51  | 26 |
| POTE ankyrin domain family member J OS=Homo sapiens GN=POTEJ PE=3 SV=1                                                            | POTEJ_HUMAN           | 117 kDa | 0.24    | []                    | 16 | 15 | 24  | 20  | 30  | 16 |
| cDNA FLJ39583 fis, clone SKMUS2004897, highly similar to ACTIN, ALPHA SKELETAL MUSCLE OS=Homo sapiens PE=2 SV=1                   | B3KUD3_HUMAN          | 38 kDa  | 0.22    | []                    | 42 | 39 | 39  | 57  | 49  | 25 |
| cDNA FLJ53662, highly similar to Actin, alpha skeletal muscle OS=Homo sapiens PE=2 SV=1                                           | B7Z6P1_HUMAN          | 39 kDa  | 0.26    | []                    | 43 | 39 | 46  | 60  | 60  | 29 |
| cDNA FLJ55253, highly similar to Actin, cytoplasmic 1 OS=Homo sapiens PE=2 SV=1                                                   | B4DW52_HUMAN          | 39 kDa  | 0.12    | []                    | 94 | 83 | 100 | 117 | 97  | 66 |
| cDNA FLJ57283, highly similar to Actin, cytoplasmic 2 OS=Homo sapiens PE=2 SV=1                                                   | B4E3A4_HUMAN          | 40 kDa  | 0.12    | []                    | 88 | 83 | 99  | 117 | 105 | 69 |
| cDNA, FLJ79260, highly similar to Actin, cytoplasmic 2 OS=Homo sapiens PE=2 SV=1                                                  | B7ZAP6_HUMAN          | 33 kDa  | 0.047   | BRAC1 low, Naive high | 67 | 61 | 73  | 74  | 58  | 45 |
| Actin-like protein (Fragment) OS=Homo sapiens GN=ACT PE=3 SV=1                                                                    | Q562V5_HUMAN          | 11 kDa  | 0.14    | []                    | 10 | 19 | 23  | 19  | 18  | 29 |
| Actin-like protein (Fragment) OS=Homo sapiens GN=ACT PE=3 SV=1                                                                    | Q562L5_HUMAN          | 12 kDa  | 0.17    | []                    | 29 | 24 | 36  | 35  | 33  | 30 |
| Actin-like protein (Fragment) OS=Homo sapiens GN=ACT PE=3 SV=1                                                                    | Q562Z6_HUMAN          | 11 kDa  | 0.08    | []                    | 22 | 18 | 20  | 24  | 14  | 13 |
| Actin-like protein (Fragment) OS=Homo sapiens GN=ACT PE=3 SV=1                                                                    | Q562N0_HUMAN          | 11 kDa  | 0.049   | BRAC1 low, Naive high | 29 | 25 | 33  | 32  | 31  | 24 |
| Actin-like protein (Fragment) OS=Homo sapiens GN=ACT PE=3 SV=1                                                                    | Q562P9_HUMAN          | 11 kDa  | 0.43    | []                    | 10 | 7  | 15  | 14  | 17  | 12 |
| Actin-like protein (Fragment) OS=Homo sapiens GN=ACT PE=3 SV=1                                                                    | Q562Y8_HUMAN          | 12 kDa  | 0.11    | []                    | 20 | 15 | 26  | 23  | 24  | 15 |
| Actin-like protein (Fragment) OS=Homo sapiens GN=ACT PE=3 SV=1                                                                    | Q562U1_HUMAN          | 11 kDa  | 0.91    | []                    | 0  | 0  | 10  | 5   | 10  | 0  |
| Actin-related protein 2 OS=Homo sapiens GN=ACTR2 PE=1 SV=1                                                                        | ARP2_HUMAN            | 45 kDa  | 0.81    | []                    | 1  | 2  | 11  | 7   | 5   | 12 |
| cDNA FLJ51656, highly similar to Actin-like protein 2 OS=Homo sapiens PE=2 SV=1                                                   | B4DHK9_HUMAN          | 39 kDa  | 0.85    | []                    | 0  | 2  | 7   | 3   | 4   | 8  |
| Actin-related protein 2/3 complex subunit 1A OS=Homo sapiens GN=ARPC1A PE=1 SV=2                                                  | ARC1A_HUMAN (+1)      | 42 kDa  | 0.93    | []                    | 0  | 0  | 3   | 1   | 3   | 0  |
| Actin-related protein 2/3 complex subunit 2 OS=Homo sapiens GN=ARPC2 PE=1 SV=1                                                    | ARPC2_HUMAN (+1)      | 34 kDa  | 0.51    | []                    | 3  | 3  | 12  | 12  | 12  | 10 |
| Actin-related protein 2/3 complex subunit 3 OS=Homo sapiens GN=ARPC3 PE=1 SV=3                                                    | ARPC3_HUMAN (+2)      | 21 kDa  | 0.18    | []                    | 0  | 0  | 1   | 1   | 5   | 2  |
| Actin-related protein 2/3 complex subunit 5 OS=Homo sapiens GN=ARPC5L PE=3 SV=1                                                   | A0A024R897_HUMAN (+2) | 17 kDa  | 0.064   | []                    | 0  | 0  | 0   | 5   | 4   | 1  |
| Activator of 90 kDa heat shock protein ATPase homolog 1 OS=Homo sapiens GN=AHSA1 PE=1 SV=1                                        | AHSA1_HUMAN (+1)      | 38 kDa  | 0.13    | []                    | 0  | 0  | 0   | 1   | 0   | 2  |
| Active breakpoint cluster region-related protein OS=Homo sapiens GN=ABR PE=2 SV=2                                                 | ABR_HUMAN (+3)        | 98 kDa  | 0.37    | []                    | 0  | 0  | 0   | 0   | 0   | 2  |
| Acyl-CoA dehydrogenase family member 9, mitochondrial OS=Homo sapiens GN=ACAD9 PE=1 SV=1                                          | ACAD9_HUMAN           | 69 kDa  | 0.54    | []                    | 0  | 2  | 1   | 2   | 2   | 3  |
| Acyl-CoA synthetase family member 2, mitochondrial OS=Homo sapiens GN=ACSF2 PE=1 SV=2                                             | ACSF2_HUMAN (+2)      | 68 kDa  | 0.07    | []                    | 0  | 0  | 0   | 1   | 1   | 4  |
| Acyl-CoA synthetase long-chain family member 3, isoform CRA_a OS=Homo sapiens GN=ACSL3 PE=4 SV=1                                  | A0A024R497_HUMAN (+2) | 80 kDa  | 0.32    | []                    | 2  | 4  | 5   | 5   | 7   | 17 |
| Acyl-coenzyme A thioesterase 9, mitochondrial OS=Homo sapiens GN=ACOT9 PE=1 SV=2                                                  | ACOT9_HUMAN           | 50 kDa  | 0.00091 | BRAC1 low, Naive high | 1  | 1  | 2   | 0   | 0   | 0  |
| Acylglycerol kinase, mitochondrial OS=Homo sapiens GN=AGK PE=1 SV=2                                                               | AGK_HUMAN (+3)        | 47 kDa  | 0.5     | []                    | 0  | 0  | 1   | 0   | 1   | 2  |
| Adenine phosphoribosyltransferase OS=Homo sapiens GN=APRT PE=1 SV=2                                                               | APT_HUMAN (+2)        | 20 kDa  | 0.05    | BRAC1 high, Naive low | 0  | 0  | 0   | 2   | 2   | 7  |
| Adenosylhomocysteinase OS=Homo sapiens GN=AHCY PE=1 SV=4                                                                          | SAHH_HUMAN            | 48 kDa  | 0.0014  | BRAC1 high, Naive low | 1  | 1  | 1   | 5   | 6   | 6  |
| Adenosylhomocysteinase OS=Homo sapiens GN=AHCYL1 PE=3 SV=1                                                                        | A0A024R0A8_HUMAN (+6) | 59 kDa  | 0.2     | []                    | 0  | 0  | 0   | 1   | 3   | 0  |
| Adenylate kinase 2, mitochondrial OS=Homo sapiens GN=AK2 PE=1 SV=1                                                                | F8VY04_HUMAN (+2)     | 21 kDa  | 0.29    | []                    | 1  | 0  | 4   | 6   | 5   | 3  |
| Adenylosuccinate synthetase isozyme 2 OS=Homo sapiens GN=ADSS PE=1 SV=3                                                           | PURA2_HUMAN (+2)      | 50 kDa  | 0.37    | []                    | 0  | 0  | 0   | 0   | 0   | 3  |
| Adenylyl cyclase-associated protein OS=Homo sapiens PE=2 SV=1                                                                     | B4DI38_HUMAN (+1)     | 49 kDa  | 0.85    | []                    | 4  | 4  | 11  | 7   | 14  | 11 |
| tr B4DNA3 B4DNA3_HUMAN Adenylyl cyclase-associated protein OS=Homo sapiens PE=2 SV=1                                              | B4DNA3_HUMAN          | ?       | 0.68    | []                    | 2  | 0  | 8   | 0   | 4   | 7  |
| Adipocyte plasma membrane-associated protein OS=Homo sapiens GN=APMAP PE=1 SV=2                                                   | APMAP_HUMAN           | 46 kDa  | 0.61    | []                    | 0  | 1  | 4   | 2   | 2   | 7  |
| Afadin (Fragment) OS=Homo sapiens GN=MLLT4 PE=1 SV=1                                                                              | H0Y7R8_HUMAN (+1)     | 43 kDa  | 0.12    | []                    | 0  | 0  | 0   | 5   | 5   | 0  |
| Afadin OS=Homo sapiens GN=MLLT4 PE=1 SV=2                                                                                         | A8MQ02_HUMAN (+3)     | 202 kDa | 0.061   | []                    | 0  | 0  | 0   | 19  | 18  | 4  |
| Aflatoxin B1 aldehyde reductase member 2 OS=Homo sapiens GN=AKR7A2 PE=1 SV=3                                                      | ARK72_HUMAN (+2)      | 40 kDa  | 0.011   | BRAC1 high, Naive low | 0  | 0  | 0   | 1   | 2   | 3  |
| Agtrin OS=Homo sapiens GN=AGRN PE=1 SV=5                                                                                          | AGRN_HUMAN            | 217 kDa | 0.0037  | BRAC1 high, Naive low | 0  | 0  | 0   | 6   | 7   | 5  |
| Aladin OS=Homo sapiens GN=AAAS PE=1 SV=1                                                                                          | AAAS_HUMAN (+3)       | 60 kDa  | 0.37    | []                    | 0  | 0  | 0   | 0   | 0   | 2  |

|                                                                                                               |                       |         |         |                       |     |     |     |     |     |    |
|---------------------------------------------------------------------------------------------------------------|-----------------------|---------|---------|-----------------------|-----|-----|-----|-----|-----|----|
| Alanine--tRNA ligase, cytoplasmic OS=Homo sapiens GN=AARS PE=1 SV=2                                           | SYAC_HUMAN            | 107 kDa | 0.04    | BRAC1 high, Naive low | 0   | 0   | 0   | 8   | 8   | 26 |
| Alcohol dehydrogenase [NADP(+)] OS=Homo sapiens GN=AKR1A1 PE=1 SV=3                                           | AK1A1_HUMAN (+1)      | 37 kDa  | 0.07    | []                    | 0   | 0   | 0   | 1   | 1   | 4  |
| Alcohol dehydrogenase class-3 OS=Homo sapiens GN=ADH5 PE=1 SV=4                                               | ADHX_HUMAN (+3)       | 40 kDa  | 0.98    | []                    | 0   | 0   | 2   | 0   | 0   | 3  |
| Aldehyde dehydrogenase 4 family, member A1, isoform CRA_a OS=Homo sapiens GN=ALDH4A1 PE=3 SV=1                | A0A024RAD8_HUMAN (+1) | 62 kDa  | 0.27    | []                    | 1   | 1   | 1   | 2   | 2   | 8  |
| Aldehyde dehydrogenase X, mitochondrial OS=Homo sapiens GN=ALDH1B1 PE=1 SV=3                                  | AL1B1_HUMAN           | 57 kDa  | 0.0054  | BRAC1 low, Naive high | 3   | 2   | 5   | 0   | 0   | 0  |
| Aldehyde dehydrogenase family 16 member A1 OS=Homo sapiens GN=ALDH16A1 PE=1 SV=2                              | A16A1_HUMAN           | 85 kDa  | 0.26    | []                    | 0   | 0   | 1   | 0   | 2   | 4  |
| Aldehyde dehydrogenase, mitochondrial OS=Homo sapiens GN=ALDH2 PE=1 SV=2                                      | ALDH2_HUMAN (+1)      | 56 kDa  | 0.45    | []                    | 0   | 1   | 5   | 4   | 7   | 3  |
| Aldo-keto reductase family 1 member C3 OS=Homo sapiens GN=AKR1C3 PE=1 SV=1                                    | A0A0A0MSS8_HUMAN (+2) | 37 kDa  | 0.07    | []                    | 0   | 0   | 0   | 1   | 1   | 4  |
| Alkylidihydroxyacetonephosphate synthase, peroxisomal OS=Homo sapiens GN=AGPS PE=1 SV=1                       | ADAS_HUMAN            | 73 kDa  | 0.023   | BRAC1 high, Naive low | 0   | 1   | 0   | 3   | 5   | 9  |
| Alpha-1-antitrypsin OS=Homo sapiens GN=SERPINA1 PE=1 SV=3                                                     | A1AT_HUMAN (+3)       | 47 kDa  | 0.37    | []                    | 0   | 0   | 0   | 0   | 0   | 6  |
| Alpha-2-macroglobulin receptor-associated protein OS=Homo sapiens GN=LRPAP1 PE=1 SV=1                         | AMRP_HUMAN (+1)       | 41 kDa  | 0.81    | []                    | 0   | 1   | 2   | 0   | 0   | 4  |
| Alpha-2A adrenergic receptor OS=Homo sapiens GN=ADRA2A PE=1 SV=3                                              | ADA2A_HUMAN           | 49 kDa  | 0.12    | []                    | 0   | 0   | 0   | 5   | 10  | 1  |
| Alpha-N-acetylgalactosaminidase OS=Homo sapiens GN=NAGLU PE=1 SV=2                                            | ANAG_HUMAN (+2)       | 82 kDa  | 0.37    | []                    | 0   | 0   | 0   | 0   | 0   | 2  |
| Actinin, alpha 1, isoform CRA_a OS=Homo sapiens GN=ACTN1 PE=4 SV=1                                            | A0A024R694_HUMAN (+1) | 103 kDa | 0.75    | []                    | 27  | 27  | 58  | 80  | 75  | 39 |
| Alpha-actinin-2 OS=Homo sapiens GN=ACTN2 PE=1 SV=1                                                            | ACTN2_HUMAN           | 104 kDa | 0.37    | []                    | 0   | 0   | 0   | 0   | 19  | 0  |
| Alpha-actinin-3 OS=Homo sapiens GN=ACTN3 PE=1 SV=2                                                            | ACTN3_HUMAN (+1)      | 103 kDa | 0.37    | []                    | 0   | 0   | 7   | 0   | 0   | 0  |
| Alpha-actinin-4 OS=Homo sapiens GN=ACTN4 PE=1 SV=2                                                            | ACTN4_HUMAN           | 105 kDa | 0.074   | []                    | 26  | 27  | 54  | 174 | 166 | 88 |
| Alpha-actinin-4 OS=Homo sapiens GN=ACTN4 PE=1 SV=2                                                            | F5GX52_HUMAN          | 60 kDa  | 0.073   | []                    | 14  | 15  | 31  | 106 | 97  | 50 |
| Alpha-adducin OS=Homo sapiens GN=ADD1 PE=1 SV=2                                                               | ADDA_HUMAN (+2)       | 81 kDa  | 0.19    | []                    | 0   | 2   | 0   | 2   | 3   | 5  |
| Alpha-aminoadipic semialdehyde dehydrogenase OS=Homo sapiens GN=ALDH7A1 PE=1 SV=5                             | AL7A1_HUMAN           | 58 kDa  | 0.0044  | BRAC1 low, Naive high | 3   | 2   | 4   | 0   | 0   | 0  |
| Alpha-centractin OS=Homo sapiens GN=ACTR1A PE=1 SV=1                                                          | ACTZ_HUMAN (+3)       | 43 kDa  | 0.022   | BRAC1 low, Naive high | 2   | 3   | 6   | 0   | 1   | 3  |
| Beta-centractin OS=Homo sapiens GN=ACTR1B PE=1 SV=1                                                           | ACTY_HUMAN (+1)       | 42 kDa  | 0.37    | []                    | 0   | 0   | 2   | 0   | 0   | 0  |
| Alpha-mannosidase 2 OS=Homo sapiens GN=MAN2A1 PE=1 SV=2                                                       | MA2A1_HUMAN           | 131 kDa | 0.37    | []                    | 0   | 0   | 0   | 0   | 0   | 2  |
| Amine oxidase [flavin-containing] A OS=Homo sapiens GN=MAOA PE=1 SV=1                                         | A0FA_HUMAN (+3)       | 60 kDa  | 0.0068  | BRAC1 high, Naive low | 0   | 0   | 0   | 3   | 3   | 2  |
| Amino acid transporter (Fragment) OS=Homo sapiens PE=2 SV=1                                                   | Q59E53_HUMAN          | 57 kDa  | 0.049   | BRAC1 high, Naive low | 4   | 6   | 6   | 42  | 40  | 20 |
| Neutral amino acid transporter B(0) OS=Homo sapiens GN=SLC1A5 PE=1 SV=2                                       | AAAT_HUMAN (+1)       | 57 kDa  | 0.038   | BRAC1 high, Naive low | 4   | 5   | 5   | 38  | 37  | 20 |
| Amino acid transporter OS=Homo sapiens PE=2 SV=1                                                              | B2R7N6_HUMAN (+2)     | 56 kDa  | 0.04    | BRAC1 high, Naive low | 0   | 0   | 1   | 5   | 7   | 3  |
| Aminoacyl tRNA synthase complex-interacting multifunctional protein 1 OS=Homo sapiens GN=AIMP1 PE=1 SV=2      | AIMP1_HUMAN           | 34 kDa  | 0.21    | []                    | 0   | 0   | 0   | 1   | 0   | 4  |
| Aminoacyl tRNA synthase complex-interacting multifunctional protein 2 OS=Homo sapiens GN=AIMP2 PE=1 SV=2      | AIMP2_HUMAN (+2)      | 35 kDa  | 0.37    | []                    | 0   | 0   | 0   | 0   | 0   | 5  |
| tr A8MU58 A8MU58_HUMAN Aminoacyl tRNA synthase complex-interacting multifunctional...                         | A8MU58_HUMAN          | ?       | 0.37    | []                    | 0   | 0   | 0   | 0   | 0   | 5  |
| Aminopeptidase B OS=Homo sapiens GN=RNPEP PE=1 SV=2                                                           | AMPB_HUMAN            | 73 kDa  | 0.11    | []                    | 0   | 0   | 1   | 2   | 1   | 5  |
| Aminopeptidase N OS=Homo sapiens GN=ANPEP PE=1 SV=4                                                           | AMPN_HUMAN (+2)       | 110 kDa | 0.0092  | BRAC1 low, Naive high | 76  | 83  | 58  | 0   | 0   | 0  |
| Anion exchange protein 2 OS=Homo sapiens GN=SLC4A2 PE=1 SV=4                                                  | B3A2_HUMAN (+1)       | 137 kDa | 0.12    | []                    | 0   | 0   | 0   | 2   | 2   | 0  |
| Ankyrin OS=Homo sapiens GN=ANK1 PE=1 SV=2                                                                     | RAI14_HUMAN           | 110 kDa | 0.2     | []                    | 1   | 1   | 8   | 1   | 0   | 0  |
| Annexin (Fragment) OS=Homo sapiens PE=2 SV=1                                                                  | Q59EP1_HUMAN (+1)     | 55 kDa  | 0.41    | []                    | 3   | 3   | 15  | 6   | 4   | 9  |
| Annexin A1 OS=Homo sapiens GN=ANXA1 PE=1 SV=2                                                                 | ANXA1_HUMAN (+1)      | 39 kDa  | 0.00029 | BRAC1 low, Naive high | 43  | 42  | 69  | 10  | 12  | 11 |
| Annexin A3 OS=Homo sapiens GN=ANXA3 PE=1 SV=3                                                                 | ANXA3_HUMAN           | 36 kDa  | 0.54    | []                    | 0   | 0   | 5   | 4   | 3   | 4  |
| Annexin A5 OS=Homo sapiens GN=ANXA5 PE=1 SV=2                                                                 | ANXA5_HUMAN (+1)      | 36 kDa  | 0.013   | BRAC1 low, Naive high | 31  | 20  | 44  | 13  | 12  | 11 |
| Annexin A6 OS=Homo sapiens GN=ANXA6 PE=1 SV=3                                                                 | ANXA6_HUMAN           | 76 kDa  | 0.00067 | BRAC1 low, Naive high | 26  | 39  | 58  | 2   | 5   | 15 |
| Annexin OS=Homo sapiens GN=ANXA6 PE=1 SV=1                                                                    | E5RK69_HUMAN          | 52 kDa  | 0.0017  | BRAC1 low, Naive high | 18  | 24  | 42  | 2   | 5   | 12 |
| Annexin A7 OS=Homo sapiens GN=ANXA7 PE=1 SV=3                                                                 | ANXA7_HUMAN (+6)      | 53 kDa  | 0.52    | []                    | 0   | 0   | 2   | 1   | 1   | 3  |
| Annexin A9 OS=Homo sapiens GN=ANXA9 PE=1 SV=3                                                                 | ANXA9_HUMAN           | 38 kDa  | 0.37    | []                    | 0   | 0   | 0   | 0   | 0   | 2  |
| Annexin A13 OS=Homo sapiens GN=ANXA13 PE=1 SV=3                                                               | ANX13_HUMAN (+1)      | 35 kDa  | 0.12    | []                    | 0   | 0   | 0   | 12  | 11  | 0  |
| Annexin OS=Homo sapiens PE=2 SV=1                                                                             | A8K2L6_HUMAN          | 40 kDa  | 0.12    | []                    | 0   | 0   | 0   | 10  | 10  | 0  |
| Annexin (Fragment) OS=Homo sapiens GN=ANXA2 PE=1 SV=1                                                         | H0YNP5_HUMAN          | 20 kDa  | 0.85    | []                    | 80  | 83  | 62  | 205 | 164 | 44 |
| Annexin OS=Homo sapiens GN=ANXA2 PE=3 SV=1                                                                    | A0A024R527_HUMAN (+2) | 39 kDa  | 0.86    | []                    | 114 | 134 | 100 | 303 | 251 | 74 |
| Annexin OS=Homo sapiens GN=HEL-5-274 PE=2 SV=1                                                                | V9HW59_HUMAN          | 39 kDa  | 0.82    | []                    | 3   | 5   | 15  | 12  | 12  | 14 |
| Annexin OS=Homo sapiens PE=2 SV=1                                                                             | B4DE02_HUMAN          | 34 kDa  | 0.95    | []                    | 3   | 5   | 15  | 11  | 11  | 14 |
| Anoctamin-6 OS=Homo sapiens GN=ANO6 PE=1 SV=2                                                                 | ANO6_HUMAN (+1)       | 106 kDa | 0.0062  | BRAC1 high, Naive low | 0   | 1   | 0   | 6   | 4   | 5  |
| Anterior gradient protein 2 homolog OS=Homo sapiens GN=AGR2 PE=1 SV=1                                         | AGR2_HUMAN (+4)       | 20 kDa  | 0.0074  | BRAC1 high, Naive low | 0   | 0   | 0   | 6   | 8   | 5  |
| Antigen peptide transporter 1 OS=Homo sapiens GN=TAP1 PE=1 SV=2                                               | TAP1_HUMAN (+1)       | 87 kDa  | 0.059   | []                    | 4   | 2   | 9   | 1   | 1   | 3  |
| TAP1 OS=Homo sapiens GN=TAP1 PE=2 SV=1                                                                        | Q6QWCO_HUMAN (+1)     | 81 kDa  | 0.059   | []                    | 4   | 2   | 9   | 1   | 1   | 3  |
| Apolipoprotein B-100 OS=Homo sapiens GN=APOB PE=1 SV=1                                                        | A0A087W7M7_HUMAN (+3) | 490 kDa | 0.2     | []                    | 0   | 0   | 1   | 3   | 4   | 0  |
| Apolipoprotein L2 OS=Homo sapiens GN=APOL2 PE=1 SV=1                                                          | APOL2_HUMAN (+3)      | 37 kDa  | 0.1     | []                    | 1   | 2   | 1   | 0   | 0   | 2  |
| Apoptosis inhibitor 5 OS=Homo sapiens GN=API5 PE=1 SV=3                                                       | API5_HUMAN (+1)       | 59 kDa  | 0.5     | []                    | 0   | 0   | 1   | 0   | 1   | 2  |
| Apoptosis-inducing factor 1, mitochondrial OS=Homo sapiens GN=AIFM1 PE=1 SV=1                                 | AIFM1_HUMAN           | 69 kDa  | 0.69    | []                    | 2   | 1   | 1   | 1   | 2   | 8  |
| Archaein 1, isoform CRA_b OS=Homo sapiens GN=ARCN1 PE=2 SV=1                                                  | B0YIW5_HUMAN (+3)     | 57 kDa  | 0.74    | []                    | 0   | 1   | 2   | 1   | 1   | 4  |
| Arf-GAP with Rho-GAP domain, ANK repeat and PH domain-containing protein 1 OS=Homo sapiens GN=ARAP1 PE=1 SV=3 | ARAP1_HUMAN (+3)      | 162 kDa | 0.37    | []                    | 0   | 0   | 0   | 0   | 0   | 2  |
| Arfaptin-1 OS=Homo sapiens GN=ARFP1 PE=1 SV=2                                                                 | ARFP1_HUMAN (+1)      | 42 kDa  | 0.12    | []                    | 0   | 0   | 0   | 3   | 0   | 5  |
| Arginine--tRNA ligase, cytoplasmic OS=Homo sapiens GN=RARS PE=1 SV=2                                          | SYRC_HUMAN            | 75 kDa  | 0.32    | []                    | 0   | 0   | 1   | 2   | 0   | 18 |
| Argininosuccinate lyase OS=Homo sapiens GN=ASL PE=1 SV=4                                                      | ARLY_HUMAN (+2)       | 52 kDa  | 0.17    | []                    | 0   | 0   | 0   | 0   | 1   | 3  |
| Armadillo repeat protein deleted in velo-cardio-facial syndrome OS=Homo sapiens GN=ARVCF PE=1 SV=1            | ARVC_HUMAN (+3)       | 105 kDa | 0.0031  | BRAC1 high, Naive low | 0   | 0   | 0   | 25  | 24  | 19 |

|                                                                                                                   |                       |         |         |                       |    |    |    |    |    |    |
|-------------------------------------------------------------------------------------------------------------------|-----------------------|---------|---------|-----------------------|----|----|----|----|----|----|
| Armadillo repeat-containing protein 10 OS=Homo sapiens GN=ARMC10 PE=1 SV=1                                        | ARM10_HUMAN (+2)      | 38 kDa  | 0.37    | []                    | 0  | 0  | 0  | 0  | 0  | 2  |
| Asparagine--tRNA ligase, cytoplasmic OS=Homo sapiens GN=NARS PE=1 SV=1                                            | SYNC_HUMAN            | 63 kDa  | 0.6     | []                    | 1  | 0  | 1  | 0  | 2  | 4  |
| Aspartate aminotransferase OS=Homo sapiens GN=GOT2 PE=3 SV=1                                                      | A0A024R6WO_HUMAN (+2) | 47 kDa  | 0.031   | BRAC1 low, Naive high | 5  | 7  | 6  | 5  | 6  | 4  |
| Aspartate aminotransferase OS=Homo sapiens PE=2 SV=1                                                              | A8K482_HUMAN          | 48 kDa  | 0.0056  | BRAC1 low, Naive high | 2  | 3  | 3  | 2  | 3  | 3  |
| Aspartate aminotransferase, cytoplasmic OS=Homo sapiens GN=GOT1 PE=1 SV=3                                         | AATC_HUMAN            | 46 kDa  | 0.37    | []                    | 0  | 0  | 0  | 0  | 0  | 2  |
| Aspartyl-tRNA synthetase, isoform CRA_b OS=Homo sapiens GN=DARS PE=3 SV=1                                         | D3DP78_HUMAN (+1)     | 53 kDa  | 0.93    | []                    | 2  | 2  | 2  | 2  | 1  | 8  |
| Aspartyl/asparaginyl beta-hydroxylase OS=Homo sapiens GN=ASPH PE=1 SV=3                                           | ASP_HUMAN             | 86 kDa  | 0.1     | []                    | 8  | 11 | 11 | 3  | 6  | 19 |
| Ataxin-2-like protein OS=Homo sapiens GN=ATXN2L PE=1 SV=2                                                         | ATX2L_HUMAN (+3)      | 113 kDa | 0.37    | []                    | 0  | 0  | 0  | 0  | 0  | 2  |
| Atlastin-3 OS=Homo sapiens GN=ATL3 PE=1 SV=1                                                                      | ATLA3_HUMAN (+2)      | 61 kDa  | 0.78    | []                    | 0  | 0  | 9  | 0  | 0  | 9  |
| Autoantigen La (Fragment) OS=Homo sapiens GN=SSB PE=2 SV=1                                                        | B5BU85_HUMAN (+1)     | 47 kDa  | 0.88    | []                    | 0  | 0  | 2  | 1  | 1  | 1  |
| Autophagy protein 5 OS=Homo sapiens GN=ATG5 PE=1 SV=2                                                             | ATG5_HUMAN (+2)       | 32 kDa  | 0.37    | []                    | 0  | 0  | 0  | 0  | 0  | 2  |
| B-cell receptor-associated protein 31 OS=Homo sapiens GN=BCAP31 PE=1 SV=3                                         | BAP31_HUMAN (+1)      | 28 kDa  | 0.68    | []                    | 1  | 0  | 3  | 1  | 2  | 6  |
| BAG family molecular chaperone regulator 2 OS=Homo sapiens GN=BAG2 PE=1 SV=1                                      | BAG2_HUMAN (+2)       | 24 kDa  | 0.2     | []                    | 1  | 2  | 0  | 0  | 0  | 1  |
| BRI3-binding protein OS=Homo sapiens GN=BRI3BP PE=1 SV=1                                                          | BRI3B_HUMAN           | 28 kDa  | 0.00029 | BRAC1 high, Naive low | 0  | 0  | 0  | 2  | 2  | 2  |
| BRO1 domain-containing protein BROX OS=Homo sapiens GN=BROX PE=1 SV=1                                             | BROX_HUMAN            | 46 kDa  | 0.12    | []                    | 0  | 0  | 0  | 2  | 0  | 2  |
| Band 4.1-like protein 1 OS=Homo sapiens GN=EPB41L1 PE=1 SV=1                                                      | A0A0C4DH22_HUMAN (+1) | 98 kDa  | 0.042   | BRAC1 high, Naive low | 0  | 0  | 0  | 13 | 12 | 4  |
| Band 4.1-like protein 2 OS=Homo sapiens GN=EPB41L2 PE=1 SV=1                                                      | E41L2_HUMAN (+5)      | 113 kDa | 0.23    | []                    | 0  | 1  | 5  | 0  | 0  | 0  |
| Band 4.1-like protein 3 OS=Homo sapiens GN=EPB41L3 PE=1 SV=2                                                      | E41L3_HUMAN (+1)      | 121 kDa | 0.066   | []                    | 1  | 5  | 3  | 0  | 0  | 0  |
| Band 4.1-like protein 5 OS=Homo sapiens GN=EPB41L5 PE=1 SV=3                                                      | E41L5_HUMAN (+1)      | 82 kDa  | 0.0079  | BRAC1 high, Naive low | 0  | 0  | 0  | 3  | 2  | 2  |
| Basal cell adhesion molecule (Lutheran blood group) OS=Homo sapiens GN=BCAM PE=4 SV=1                             | A0A068W6HO_HUMAN (+6) | 67 kDa  | 0.00019 | BRAC1 high, Naive low | 0  | 0  | 0  | 16 | 13 | 17 |
| Basic leucine zipper and W2 domain-containing protein 1 OS=Homo sapiens GN=BZW1 PE=1 SV=1                         | BZW1_HUMAN (+2)       | 48 kDa  | 0.37    | []                    | 0  | 0  | 0  | 0  | 0  | 4  |
| Basic leucine zipper and W2 domains 2, isoform CRA_a OS=Homo sapiens GN=BZW2 PE=4 SV=1                            | A0A024RA42_HUMAN (+4) | 48 kDa  | 0.13    | []                    | 0  | 0  | 0  | 1  | 0  | 2  |
| Beta 5-tubulin OS=Homo sapiens GN=TUBB PE=1 SV=1                                                                  | Q5SU16_HUMAN (+1)     | 50 kDa  | 0.46    | []                    | 25 | 30 | 34 | 37 | 42 | 64 |
| Tubulin beta-2B chain OS=Homo sapiens GN=TUBB2B PE=1 SV=1                                                         | TBB2B_HUMAN           | 50 kDa  | 0.86    | []                    | 16 | 24 | 25 | 30 | 31 | 49 |
| Tubulin beta-6 chain OS=Homo sapiens GN=TUBB6 PE=1 SV=1                                                           | TBB6_HUMAN            | 50 kDa  | 0.14    | []                    | 6  | 7  | 15 | 10 | 6  | 14 |
| Tubulin beta-8 chain OS=Homo sapiens GN=TUBB8 PE=1 SV=1                                                           | A0A075B736_HUMAN (+2) | 46 kDa  | 0.37    | []                    | 0  | 0  | 8  | 0  | 0  | 0  |
| cDNA FLJ11352 fis, clone HEMBA1000020, highly similar to Tubulin beta-2C chain OS=Homo sapiens PE=2 SV=1          | B3KML9_HUMAN          | 45 kDa  | 0.86    | []                    | 8  | 9  | 15 | 16 | 12 | 29 |
| cDNA, FLJ93005, highly similar to Homo sapiens tubulin, beta polypeptide (TUBB), mRNA OS=Homo sapiens PE=2 SV=1   | B2R6L0_HUMAN (+1)     | 50 kDa  | 0.46    | []                    | 17 | 25 | 26 | 29 | 31 | 48 |
| Beta globin (Fragment) OS=Homo sapiens PE=3 SV=1                                                                  | B3VLO5_HUMAN (+18)    | 11 kDa  | 0.011   | BRAC1 low, Naive high | 1  | 2  | 3  | 1  | 0  | 0  |
| Beta-1-syntrophin OS=Homo sapiens GN=SNTB1 PE=1 SV=3                                                              | SNTB1_HUMAN           | 58 kDa  | 0.0015  | BRAC1 high, Naive low | 0  | 1  | 0  | 11 | 8  | 11 |
| Beta-hexosaminidase subunit alpha OS=Homo sapiens GN=HEXA PE=1 SV=2                                               | HEXA_HUMAN (+4)       | 61 kDa  | 0.37    | []                    | 0  | 0  | 0  | 0  | 0  | 7  |
| Beta-hexosaminidase subunit beta OS=Homo sapiens GN=HEXB PE=1 SV=3                                                | HEXB_HUMAN (+1)       | 63 kDa  | 0.005   | BRAC1 low, Naive high | 3  | 4  | 4  | 0  | 1  | 3  |
| Bifunctional 3'-phosphoadenosine 5'-phosphosulfate synthase 2 OS=Homo sapiens GN=PAPSS2 PE=1 SV=2                 | PAPS2_HUMAN (+2)      | 70 kDa  | 0.37    | []                    | 0  | 0  | 2  | 0  | 0  | 0  |
| Bifunctional coenzyme A synthase OS=Homo sapiens GN=COASY PE=1 SV=4                                               | COASY_HUMAN           | 62 kDa  | 0.19    | []                    | 0  | 0  | 0  | 1  | 1  | 8  |
| Bifunctional glutamate/proline--tRNA ligase OS=Homo sapiens GN=EPRS PE=1 SV=5                                     | SYEP_HUMAN            | 171 kDa | 0.34    | []                    | 0  | 1  | 1  | 2  | 1  | 30 |
| Bifunctional purine biosynthesis protein PURH OS=Homo sapiens GN=ATIC PE=1 SV=3                                   | PUR9_HUMAN (+1)       | 65 kDa  | 0.19    | []                    | 0  | 0  | 3  | 7  | 3  | 29 |
| cDNA FLJ57133, highly similar to Bifunctional purine biosynthesis protein PURH OS=Homo sapiens PE=2 SV=1          | B4DP06_HUMAN          | 59 kDa  | 0.21    | []                    | 0  | 0  | 3  | 5  | 3  | 25 |
| Bone marrow stromal cell antigen 2, isoform CRA_a OS=Homo sapiens GN=BST2 PE=4 SV=1                               | A0A024R7H5_HUMAN (+2) | 20 kDa  | 0.64    | []                    | 1  | 0  | 2  | 2  | 2  | 2  |
| Brain acid soluble protein 1 OS=Homo sapiens GN=BASP1 PE=1 SV=2                                                   | BASP1_HUMAN           | 23 kDa  | 0.00029 | BRAC1 low, Naive high | 14 | 14 | 18 | 0  | 0  | 0  |
| Brain-specific angiogenesis inhibitor 1-associated protein 2 OS=Homo sapiens GN=BAIAP2 PE=1 SV=1                  | BAIP2_HUMAN (+1)      | 61 kDa  | 0.017   | BRAC1 high, Naive low | 0  | 0  | 0  | 15 | 16 | 8  |
| Brain-specific angiogenesis inhibitor 1-associated protein 2-like protein 1 OS=Homo sapiens GN=BAIAP2L1 PE=1 SV=2 | BI2L1_HUMAN           | 57 kDa  | 0.00029 | BRAC1 high, Naive low | 0  | 0  | 0  | 2  | 2  | 2  |
| Brefeldin A-inhibited guanine nucleotide-exchange protein 1 OS=Homo sapiens GN=ARFGEF1 PE=1 SV=2                  | BIG1_HUMAN (+3)       | 209 kDa | 0.37    | []                    | 0  | 0  | 0  | 0  | 0  | 3  |
| Brefeldin A-inhibited guanine nucleotide-exchange protein 2 OS=Homo sapiens GN=ARFGEF2 PE=1 SV=3                  | BIG2_HUMAN            | 202 kDa | 0.37    | []                    | 0  | 0  | 0  | 0  | 0  | 5  |
| Bumetanide-sensitive Na-K-Cl cotransporter OS=Homo sapiens GN=SLC12A2 PE=2 SV=1                                   | Q53ZR1_HUMAN (+1)     | 131 kDa | 0.036   | BRAC1 high, Naive low | 0  | 1  | 0  | 48 | 55 | 19 |
| C-1-tetrahydrofolate synthase, cytoplasmic OS=Homo sapiens GN=MTHFD1 PE=1 SV=3                                    | C1TC_HUMAN (+1)       | 102 kDa | 0.082   | []                    | 1  | 3  | 3  | 6  | 6  | 14 |
| C-terminal-binding protein 1 OS=Homo sapiens GN=CTBP1 PE=1 SV=2                                                   | CTBP1_HUMAN (+1)      | 48 kDa  | 0.37    | []                    | 0  | 0  | 0  | 0  | 0  | 4  |
| C-type mannose receptor 2 OS=Homo sapiens GN=MRC2 PE=1 SV=2                                                       | MRC2_HUMAN            | 167 kDa | 0.0028  | BRAC1 low, Naive high | 7  | 13 | 11 | 0  | 0  | 0  |
| CAAX prenyl protease 1 homolog OS=Homo sapiens GN=ZMPSTE24 PE=1 SV=2                                              | FACE1_HUMAN (+1)      | 55 kDa  | 0.37    | []                    | 0  | 0  | 0  | 0  | 0  | 4  |
| CAD protein OS=Homo sapiens GN=CAD PE=1 SV=1                                                                      | F8VPD4_HUMAN (+1)     | 236 kDa | 0.019   | BRAC1 high, Naive low | 0  | 1  | 1  | 6  | 5  | 13 |
| CCR4-NOT transcription complex subunit 1 OS=Homo sapiens GN=CNOT1 PE=1 SV=2                                       | CNOT1_HUMAN           | 267 kDa | 0.012   | BRAC1 high, Naive low | 0  | 0  | 0  | 3  | 5  | 3  |
| CD2-associated protein OS=Homo sapiens GN=CD2AP PE=1 SV=1                                                         | CD2AP_HUMAN           | 71 kDa  | 0.17    | []                    | 0  | 0  | 0  | 0  | 1  | 3  |
| CD59 glycoprotein OS=Homo sapiens GN=CD59 PE=1 SV=1                                                               | CD59_HUMAN (+3)       | 14 kDa  | 0.89    | []                    | 1  | 3  | 3  | 4  | 5  | 1  |
| CD82 antigen OS=Homo sapiens GN=CD82 PE=1 SV=1                                                                    | CD82_HUMAN (+1)       | 30 kDa  | 0.039   | BRAC1 high, Naive low | 0  | 0  | 0  | 3  | 3  | 1  |
| CD99 antigen OS=Homo sapiens GN=CD99 PE=1 SV=1                                                                    | CD99_HUMAN (+1)       | 19 kDa  | 0.014   | BRAC1 low, Naive high | 2  | 1  | 3  | 0  | 0  | 0  |
| CD109 antigen OS=Homo sapiens GN=CD109 PE=1 SV=2                                                                  | CD109_HUMAN           | 162 kDa | 0.023   | BRAC1 low, Naive high | 16 | 15 | 9  | 0  | 0  | 0  |
| CD133 isoform H OS=Homo sapiens GN=CD133 PE=2 SV=1                                                                | A0A0A0NOM1_HUMAN (+3) | 96 kDa  | 0.004   | BRAC1 high, Naive low | 0  | 0  | 0  | 4  | 3  | 7  |
| CD166 antigen OS=Homo sapiens GN=ALCAM PE=1 SV=2                                                                  | CD166_HUMAN           | 65 kDa  | 0.011   | BRAC1 low, Naive high | 5  | 8  | 16 | 1  | 3  | 0  |
| CD276 antigen OS=Homo sapiens GN=CD276 PE=1 SV=1                                                                  | A0A0C4DGH0_HUMAN (+2) | 42 kDa  | 0.84    | []                    | 1  | 3  | 4  | 4  | 3  | 7  |
| CD42 effector protein (Rho GTPase binding) 4, isoform CRA_a OS=Homo sapiens GN=CDC42EP4 PE=2 SV=1                 | B2R6D8_HUMAN (+1)     | 38 kDa  | 0.028   | BRAC1 high, Naive low | 0  | 0  | 0  | 1  | 2  | 1  |
| CDGSH iron-sulfur domain-containing protein 2 OS=Homo sapiens GN=CISD2 PE=1 SV=1                                  | CISD2_HUMAN (+1)      | 15 kDa  | 0.37    | []                    | 0  | 0  | 0  | 0  | 3  | 0  |
| CDK5 regulatory subunit-associated protein 3 OS=Homo sapiens GN=CDK5RAP3 PE=1 SV=2                                | CKSP3_HUMAN           | 57 kDa  | 0.58    | []                    | 0  | 2  | 1  | 0  | 1  | 2  |
| COP9 signalosome complex subunit 2 OS=Homo sapiens GN=COPS2 PE=1 SV=1                                             | CSN2_HUMAN (+4)       | 52 kDa  | 0.37    | []                    | 0  | 0  | 2  | 0  | 0  | 0  |

|                                                                                                                              |                       |         |         |                       |    |    |    |     |     |    |
|------------------------------------------------------------------------------------------------------------------------------|-----------------------|---------|---------|-----------------------|----|----|----|-----|-----|----|
| CTD (Carboxy-terminal domain, RNA polymerase II, polypeptide A) small phosphatase 1, isoform CRA_b (Fragment) OS=Homo sapien | A0A024R414_HUMAN (+2) | 29 kDa  | 0.3     | []                    | 0  | 0  | 1  | 2   | 2   | 0  |
| CTP synthase 1 OS=Homo sapiens GN=CTPS1 PE=1 SV=2                                                                            | PYRG1_HUMAN           | 67 kDa  | 0.67    | []                    | 0  | 0  | 3  | 0   | 1   | 7  |
| CUB domain containing protein 1, isoform CRA_a OS=Homo sapiens GN=CDCP1 PE=4 SV=1                                            | A0A024R2T5_HUMAN (+1) | 93 kDa  | 0.0027  | BRAC1 high, Naive low | 0  | 0  | 0  | 1   | 1   | 2  |
| Cadherin-1 OS=Homo sapiens GN=CDH1 PE=1 SV=1                                                                                 | A0A087WXI5_HUMAN (+4) | 100 kDa | 0.048   | BRAC1 high, Naive low | 0  | 0  | 0  | 31  | 30  | 9  |
| Cadherin-2 OS=Homo sapiens GN=CDH2 PE=1 SV=4                                                                                 | CADH2_HUMAN (+1)      | 100 kDa | 0.005   | BRAC1 low, Naive high | 2  | 3  | 6  | 0   | 0   | 0  |
| Cadherin-11 OS=Homo sapiens GN=CDH11 PE=2 SV=2                                                                               | CAD11_HUMAN (+3)      | 88 kDa  | 0.37    | []                    | 0  | 2  | 0  | 0   | 0   | 0  |
| Cadherin-13 OS=Homo sapiens GN=CDH13 PE=1 SV=1                                                                               | CAD13_HUMAN (+2)      | 78 kDa  | 0.069   | []                    | 3  | 1  | 2  | 0   | 0   | 0  |
| Calcium binding protein 39, isoform CRA_a OS=Homo sapiens GN=CAB39 PE=4 SV=1                                                 | A0A024R496_HUMAN (+3) | 40 kDa  | 0.36    | []                    | 0  | 1  | 1  | 2   | 2   | 1  |
| Calcium-binding mitochondrial carrier protein Aralar2 OS=Homo sapiens GN=SLC25A13 PE=1 SV=2                                  | CMC2_HUMAN (+1)       | 74 kDa  | 0.18    | []                    | 0  | 2  | 0  | 2   | 3   | 8  |
| Calcium-transporting ATPase OS=Homo sapiens GN=ATP2B1 PE=3 SV=1                                                              | A0A024RBC7_HUMAN (+1) | 135 kDa | 0.21    | []                    | 14 | 19 | 17 | 24  | 21  | 12 |
| Calcium-transporting ATPase OS=Homo sapiens GN=ATP2B4 PE=3 SV=1                                                              | A0A024R968_HUMAN (+1) | 134 kDa | 0.0017  | BRAC1 low, Naive high | 30 | 37 | 35 | 7   | 10  | 3  |
| Calcium/calmodulin-dependent protein kinase (CaM kinase) II alpha, isoform CRA_b OS=Homo sapiens GN=CAMK2A PE=2 SV=1         | A8K161_HUMAN (+3)     | 55 kDa  | 0.37    | []                    | 0  | 0  | 0  | 1   | 0   | 0  |
| Calcium/calmodulin-dependent protein kinase (CaM kinase) II delta, isoform CRA_a OS=Homo sapiens GN=CAMK2D PE=4 SV=1         | A0A024RDK3_HUMAN (+5) | 56 kDa  | 0.46    | []                    | 0  | 3  | 4  | 3   | 5   | 8  |
| Calcium/calmodulin-dependent protein kinase (CaM kinase) II gamma, isoform CRA_a OS=Homo sapiens GN=CAMK2G PE=1 SV=1         | A0A0A0MS52_HUMAN (+8) | 60 kDa  | 0.37    | []                    | 0  | 0  | 0  | 0   | 0   | 3  |
| Calcyclin-binding protein OS=Homo sapiens GN=CACYBP PE=1 SV=2                                                                | CYBP_HUMAN (+2)       | 26 kDa  | 0.37    | []                    | 0  | 0  | 0  | 0   | 0   | 3  |
| Calnexin OS=Homo sapiens GN=CANX PE=1 SV=2                                                                                   | CALX_HUMAN            | 68 kDa  | 0.94    | []                    | 21 | 18 | 25 | 30  | 33  | 48 |
| Calpain 1, (Mu/I) large subunit, isoform CRA_a OS=Homo sapiens GN=CAPN1 PE=4 SV=1                                            | A0A024R580_HUMAN (+3) | 82 kDa  | 0.86    | []                    | 0  | 3  | 8  | 3   | 1   | 11 |
| Calpain-1 catalytic subunit (Fragment) OS=Homo sapiens GN=CAPN1 PE=1 SV=1                                                    | E9PL37_HUMAN          | 21 kDa  | 0.37    | []                    | 0  | 0  | 0  | 0   | 0   | 3  |
| Calpain small subunit 1 OS=Homo sapiens GN=CAPNS1 PE=1 SV=1                                                                  | A0A0C4DGQ5_HUMAN (+3) | 34 kDa  | 0.94    | []                    | 0  | 1  | 4  | 3   | 3   | 0  |
| Calpain-5 OS=Homo sapiens GN=CAPN5 PE=1 SV=1                                                                                 | A0A087X0C8_HUMAN (+2) | 73 kDa  | 0.017   | BRAC1 high, Naive low | 0  | 0  | 0  | 7   | 10  | 5  |
| Calponin OS=Homo sapiens GN=CNN2 PE=1 SV=1                                                                                   | B4DUT8_HUMAN (+4)     | 36 kDa  | 0.39    | []                    | 4  | 5  | 4  | 8   | 5   | 2  |
| Calponin-1 OS=Homo sapiens GN=CNN1 PE=1 SV=2                                                                                 | CNN1_HUMAN (+2)       | 33 kDa  | 0.049   | BRAC1 low, Naive high | 1  | 1  | 4  | 0   | 0   | 0  |
| Calponin-3 OS=Homo sapiens GN=CNN3 PE=1 SV=1                                                                                 | CNN3_HUMAN            | 36 kDa  | 0.63    | []                    | 0  | 0  | 3  | 0   | 0   | 2  |
| Calreticulin OS=Homo sapiens GN=CALR PE=1 SV=1                                                                               | CALR_HUMAN (+2)       | 48 kDa  | 0.013   | BRAC1 low, Naive high | 27 | 26 | 31 | 16  | 15  | 33 |
| cDNA FLJ53009, highly similar to Calreticulin OS=Homo sapiens PE=2 SV=1                                                      | B4DHR1_HUMAN          | 24 kDa  | 0.026   | BRAC1 low, Naive high | 22 | 21 | 20 | 13  | 10  | 21 |
| Calumenin OS=Homo sapiens GN=CALU PE=1 SV=2                                                                                  | CALU_HUMAN (+2)       | 37 kDa  | 0.056   | []                    | 8  | 4  | 14 | 0   | 0   | 9  |
| tr A0A024R755 A0A024R755_HUMAN Calumenin, isoform CRA_a OS=Homo sapiens GN=CALU PE=4...                                      | A0A024R755_HUMAN (+1) | ?       | 0.083   | []                    | 5  | 3  | 11 | 0   | 0   | 8  |
| Canalicular multispecific organic anion transporter 2 OS=Homo sapiens GN=ABCC3 PE=1 SV=3                                     | MRP3_HUMAN            | 169 kDa | 0.0059  | BRAC1 high, Naive low | 1  | 0  | 1  | 19  | 14  | 14 |
| Capping protein (Actin filament) muscle Z-line, alpha 1, isoform CRA_a OS=Homo sapiens GN=CAPZA1 PE=4 SV=1                   | A0A024R0E5_HUMAN (+2) | 33 kDa  | 0.16    | []                    | 3  | 3  | 6  | 7   | 9   | 9  |
| Capping protein (Actin filament) muscle Z-line, alpha 2 OS=Homo sapiens GN=CAPZA2 PE=2 SV=1                                  | A4D0V4_HUMAN (+3)     | 33 kDa  | 0.0028  | BRAC1 high, Naive low | 1  | 2  | 2  | 5   | 6   | 7  |
| Capping protein (Actin filament) muscle Z-line, beta, isoform CRA_a OS=Homo sapiens GN=CAPZB PE=1 SV=1                       | B1AK87_HUMAN (+2)     | 29 kDa  | 0.3     | []                    | 1  | 1  | 4  | 5   | 3   | 6  |
| Caprin-1 OS=Homo sapiens GN=CAPRIN1 PE=1 SV=1                                                                                | A0A087X082_HUMAN (+1) | 73 kDa  | 0.022   | BRAC1 high, Naive low | 0  | 0  | 0  | 1   | 3   | 3  |
| Carbonic anhydrase 9 OS=Homo sapiens GN=CA9 PE=1 SV=2                                                                        | CAH9_HUMAN            | 50 kDa  | 0.036   | BRAC1 high, Naive low | 0  | 0  | 0  | 7   | 11  | 4  |
| Carbonic anhydrase 12 OS=Homo sapiens GN=CA12 PE=1 SV=1                                                                      | CAH12_HUMAN           | 39 kDa  | 0.029   | BRAC1 high, Naive low | 0  | 0  | 0  | 15  | 11  | 6  |
| Carbonyl reductase [NADPH] 1 OS=Homo sapiens GN=CBR1 PE=1 SV=3                                                               | CBR1_HUMAN            | 30 kDa  | 0.74    | []                    | 1  | 2  | 1  | 1   | 3   | 2  |
| Carboxypeptidase D OS=Homo sapiens GN=CPD PE=1 SV=2                                                                          | CBPD_HUMAN            | 153 kDa | 0.36    | []                    | 0  | 1  | 1  | 2   | 2   | 1  |
| Carcinoembryonic antigen-related cell adhesion molecule 1 OS=Homo sapiens GN=CEACAM1 PE=1 SV=2                               | CEAM1_HUMAN (+1)      | 58 kDa  | 0.0042  | BRAC1 high, Naive low | 0  | 0  | 0  | 5   | 7   | 12 |
| Carcinoembryonic antigen-related cell adhesion molecule 5 OS=Homo sapiens GN=CEACAM5 PE=1 SV=1                               | A0A024R0K5_HUMAN (+6) | 77 kDa  | 0.12    | []                    | 0  | 0  | 0  | 2   | 2   | 0  |
| Carcinoembryonic antigen-related cell adhesion molecule 6 OS=Homo sapiens GN=CEACAM6 PE=1 SV=3                               | CEAM6_HUMAN           | 37 kDa  | 0.16    | []                    | 0  | 0  | 0  | 2   | 1   | 0  |
| Carnitine O-acetyltransferase OS=Homo sapiens GN=CRAT PE=1 SV=5                                                              | CACP_HUMAN (+2)       | 71 kDa  | 0.37    | []                    | 0  | 0  | 0  | 0   | 0   | 2  |
| Carnitine O-palmitoyltransferase 1, liver isoform OS=Homo sapiens GN=CPT1A PE=1 SV=2                                         | CPT1A_HUMAN (+2)      | 88 kDa  | 0.014   | BRAC1 low, Naive high | 1  | 1  | 2  | 0   | 1   | 0  |
| Casein kinase I isoform alpha OS=Homo sapiens GN=CSNK1A1 PE=1 SV=2                                                           | KC1A_HUMAN (+1)       | 39 kDa  | 0.03    | BRAC1 high, Naive low | 0  | 0  | 0  | 1   | 1   | 3  |
| Casein kinase I isoform gamma-3 OS=Homo sapiens GN=CSNK1G3 PE=1 SV=2                                                         | KC1G3_HUMAN           | 51 kDa  | 0.12    | []                    | 0  | 0  | 0  | 2   | 2   | 0  |
| Casein kinase II subunit alpha OS=Homo sapiens GN=CSNK2A1 PE=1 SV=1                                                          | CSK21_HUMAN (+2)      | 45 kDa  | 0.45    | []                    | 0  | 0  | 2  | 1   | 2   | 2  |
| Caspase-8 OS=Homo sapiens GN=CASP8 PE=1 SV=1                                                                                 | CASP8_HUMAN (+3)      | 55 kDa  | 0.37    | []                    | 0  | 0  | 0  | 0   | 0   | 2  |
| Catalase OS=Homo sapiens GN=CAT PE=1 SV=3                                                                                    | CATA_HUMAN (+1)       | 60 kDa  | 0.91    | []                    | 5  | 4  | 5  | 3   | 9   | 15 |
| Catechol O-methyltransferase OS=Homo sapiens GN=COMT PE=1 SV=2                                                               | COMT_HUMAN            | 30 kDa  | 0.38    | []                    | 1  | 1  | 2  | 2   | 2   | 7  |
| Catenin (Cadherin-associated protein), beta 1, 88kDa, isoform CRA_a OS=Homo sapiens GN=CTNNB1 PE=4 SV=1                      | A0A024R2Q3_HUMAN (+3) | 85 kDa  | 0.04    | BRAC1 high, Naive low | 3  | 9  | 11 | 53  | 47  | 27 |
| CTNNA2 protein OS=Homo sapiens GN=CTNNA2 PE=2 SV=1                                                                           | Q49AD3_HUMAN          | 76 kDa  | 0.37    | []                    | 0  | 0  | 0  | 0   | 10  | 0  |
| Catenin alpha-1 OS=Homo sapiens GN=CTNNA1 PE=1 SV=1                                                                          | CTNA1_HUMAN           | 100 kDa | 0.041   | BRAC1 high, Naive low | 9  | 10 | 15 | 111 | 100 | 52 |
| Catenin alpha-2 OS=Homo sapiens GN=CTNNA2 PE=1 SV=5                                                                          | CTNA2_HUMAN           | 105 kDa | 0.37    | []                    | 0  | 0  | 0  | 10  | 0   | 0  |
| Catenin delta-1 OS=Homo sapiens GN=CTNND1 PE=1 SV=2                                                                          | C9JZR2_HUMAN (+2)     | 105 kDa | 0.026   | BRAC1 high, Naive low | 5  | 9  | 14 | 95  | 88  | 50 |
| Cathepsin B OS=Homo sapiens GN=CTSB PE=1 SV=3                                                                                | CATB_HUMAN (+5)       | 38 kDa  | 0.37    | []                    | 0  | 0  | 4  | 0   | 0   | 0  |
| Cathepsin D OS=Homo sapiens GN=CTSD PE=1 SV=1                                                                                | CATD_HUMAN (+2)       | 45 kDa  | 0.98    | []                    | 3  | 2  | 0  | 2   | 4   | 4  |
| Cathepsin Z OS=Homo sapiens GN=CTSZ PE=1 SV=1                                                                                | CATZ_HUMAN (+1)       | 34 kDa  | 0.65    | []                    | 0  | 1  | 0  | 0   | 2   | 1  |
| Cation-dependent mannose-6-phosphate receptor OS=Homo sapiens GN=M6PR PE=1 SV=1                                              | MPRD_HUMAN (+1)       | 31 kDa  | 0.66    | []                    | 0  | 1  | 1  | 1   | 1   | 2  |
| Caveolin-1 OS=Homo sapiens GN=CAV1 PE=1 SV=4                                                                                 | CAV1_HUMAN (+1)       | 20 kDa  | 0.003   | BRAC1 low, Naive high | 9  | 7  | 10 | 0   | 0   | 0  |
| tr A0A024R757 A0A024R757_HUMAN Caveolin OS=Homo sapiens GN=CAV1 PE=3 SV=1                                                    | A0A024R757_HUMAN (+2) | ?       | 0.00055 | BRAC1 low, Naive high | 5  | 5  | 6  | 0   | 0   | 0  |
| Cell cycle control protein 50B OS=Homo sapiens GN=TMEM30B PE=1 SV=1                                                          | CS50B_HUMAN           | 39 kDa  | 0.0027  | BRAC1 high, Naive low | 0  | 0  | 0  | 1   | 1   | 2  |
| Cell division cycle 2, G1 to S and G2 to M, isoform CRA_c OS=Homo sapiens GN=CDC2 PE=4 SV=1                                  | A0A024QZJ8_HUMAN (+3) | 28 kDa  | 0.0014  | BRAC1 high, Naive low | 0  | 0  | 0  | 3   | 2   | 3  |
| Cell division cycle 42 (GTP binding protein, 25kDa), isoform CRA_a OS=Homo sapiens GN=CDC42 PE=3 SV=1                        | A0A024RAE4_HUMAN (+2) | 21 kDa  | 0.64    | []                    | 3  | 10 | 11 | 18  | 15  | 11 |
| Cell migration-inducing and hyaluronan-binding protein OS=Homo sapiens GN=CEMIP PE=1 SV=2                                    | CEMIP_HUMAN           | 153 kDa | 0.089   | []                    | 4  | 3  | 18 | 0   | 0   | 0  |

|                                                                                                   |                       |         |           |                       |    |    |    |    |    |    |
|---------------------------------------------------------------------------------------------------|-----------------------|---------|-----------|-----------------------|----|----|----|----|----|----|
| Cell surface A33 antigen OS=Homo sapiens GN=GPA33 PE=1 SV=1                                       | GPA33_HUMAN           | 36 kDa  | 0.16      | []                    | 0  | 0  | 0  | 4  | 2  | 0  |
| Centromere/kinetochore protein zw10 homolog OS=Homo sapiens GN=ZW10 PE=1 SV=3                     | ZW10_HUMAN (+1)       | 89 kDa  | 0.13      | []                    | 0  | 0  | 0  | 0  | 1  | 2  |
| Ceramide synthase 2 OS=Homo sapiens GN=CERS2 PE=1 SV=1                                            | CERS2_HUMAN (+1)      | 45 kDa  | 0.6       | []                    | 0  | 0  | 1  | 0  | 0  | 4  |
| Ceramide synthase 6 OS=Homo sapiens GN=CERS6 PE=1 SV=1                                            | CERS6_HUMAN           | 45 kDa  | 0.13      | []                    | 0  | 0  | 0  | 1  | 0  | 2  |
| Chaperonin containing TCP1, subunit 6A (Zeta 1), isoform CRA_a OS=Homo sapiens GN=CCT6A PE=3 SV=1 | A0A024RDL1_HUMAN (+3) | 58 kDa  | 0.057     | []                    | 0  | 1  | 6  | 8  | 10 | 20 |
| Chaperonin containing TCP1, subunit 7 (Eta) variant (Fragment) OS=Homo sapiens PE=2 SV=1          | Q53HV2_HUMAN (+1)     | 59 kDa  | 0.22      | []                    | 1  | 2  | 10 | 10 | 9  | 17 |
| Chaperonin containing TCP1, subunit 8 (Theta) variant (Fragment) OS=Homo sapiens PE=2 SV=1        | Q53HU0_HUMAN (+1)     | 60 kDa  | 0.67      | []                    | 3  | 4  | 7  | 8  | 8  | 8  |
| Charged multivesicular body protein 2a OS=Homo sapiens GN=CHMP2A PE=1 SV=1                        | CHM2A_HUMAN (+1)      | 25 kDa  | 0.37      | []                    | 0  | 0  | 0  | 0  | 0  | 3  |
| Charged multivesicular body protein 4a OS=Homo sapiens GN=CHMP4A PE=1 SV=3                        | CHM4A_HUMAN (+4)      | 25 kDa  | 0.37      | []                    | 0  | 0  | 0  | 0  | 0  | 2  |
| Charged multivesicular body protein 4b OS=Homo sapiens GN=CHMP4B PE=1 SV=1                        | CHM4B_HUMAN           | 25 kDa  | 0.94      | []                    | 2  | 2  | 0  | 2  | 1  | 6  |
| Chitobiosyldiphosphodolichol beta-mannosyltransferase OS=Homo sapiens GN=ALG1 PE=1 SV=2           | ALG1_HUMAN            | 53 kDa  | 0.82      | []                    | 0  | 0  | 2  | 0  | 1  | 1  |
| Chloride intracellular channel protein 1 OS=Homo sapiens GN=CLIC1 PE=1 SV=4                       | CLIC1_HUMAN (+2)      | 27 kDa  | 0.14      | []                    | 2  | 6  | 5  | 15 | 12 | 10 |
| Chloride intracellular channel protein 3 OS=Homo sapiens GN=CLIC3 PE=1 SV=2                       | CLIC3_HUMAN (+1)      | 27 kDa  | 0.23      | []                    | 0  | 0  | 0  | 0  | 1  | 5  |
| Chloride intracellular channel protein OS=Homo sapiens PE=2 SV=1                                  | B4DWC4_HUMAN (+2)     | 28 kDa  | 0.97      | []                    | 2  | 3  | 5  | 8  | 5  | 2  |
| Chondroitin sulfate proteoglycan 4 OS=Homo sapiens GN=CSPG4 PE=1 SV=2                             | CSPG4_HUMAN           | 251 kDa | 0.056     | []                    | 14 | 24 | 6  | 0  | 0  | 0  |
| Chromosome 6 open reading frame 55, isoform CRA_b OS=Homo sapiens GN=VTA1 PE=1 SV=1               | A0A087WY55_HUMAN (+1) | 31 kDa  | 0.1       | []                    | 1  | 0  | 0  | 2  | 2  | 3  |
| Chromosome 7 open reading frame 24 OS=Homo sapiens GN=C7orf24 PE=4 SV=1                           | A0A090N7V5_HUMAN (+2) | 21 kDa  | 0.12      | []                    | 0  | 0  | 0  | 2  | 2  | 0  |
| Chromosome 9 open reading frame 88, isoform CRA_a OS=Homo sapiens GN=C9orf88 PE=4 SV=1            | A0A024R872_HUMAN (+1) | 83 kDa  | 0.031     | BRAC1 high, Naive low | 2  | 2  | 6  | 35 | 29 | 18 |
| Chromosome-associated kinesin KIF4A OS=Homo sapiens GN=KIF4A PE=1 SV=3                            | KIF4A_HUMAN (+2)      | 140 kDa | 0.19      | []                    | 0  | 0  | 0  | 2  | 0  | 1  |
| Cingulin OS=Homo sapiens GN=CGN PE=2 SV=1                                                         | B9EK46_HUMAN (+1)     | 137 kDa | 0.042     | BRAC1 high, Naive low | 0  | 0  | 0  | 3  | 2  | 1  |
| Citrate synthase OS=Homo sapiens GN=CS PE=1 SV=1                                                  | A0A0C4DG13_HUMAN      | 45 kDa  | 0.34      | []                    | 4  | 3  | 5  | 5  | 4  | 8  |
| Citron Rho-interacting kinase OS=Homo sapiens GN=CIT PE=1 SV=2                                    | CTRO_HUMAN            | 231 kDa | 0.12      | []                    | 0  | 0  | 0  | 2  | 2  | 0  |
| Claritin-3 OS=Homo sapiens GN=CLRN3 PE=2 SV=1                                                     | CLRN3_HUMAN           | 25 kDa  | 0.028     | BRAC1 high, Naive low | 0  | 0  | 0  | 1  | 2  | 1  |
| Clathrin heavy chain OS=Homo sapiens GN=CLTC PE=1 SV=1                                            | A0A087WVQ6_HUMAN (+1) | 192 kDa | 0.14      | []                    | 19 | 29 | 51 | 21 | 31 | 55 |
| Clathrin interactor 1 OS=Homo sapiens GN=CLINT1 PE=1 SV=1                                         | EPN4_HUMAN            | 68 kDa  | 0.21      | []                    | 0  | 0  | 0  | 0  | 1  | 4  |
| Claudin OS=Homo sapiens PE=2 SV=1                                                                 | B3KW38_HUMAN (+3)     | 21 kDa  | 0.37      | []                    | 0  | 0  | 0  | 0  | 0  | 2  |
| Claudin-3 OS=Homo sapiens GN=CLDN3 PE=1 SV=1                                                      | CLD3_HUMAN (+1)       | 23 kDa  | 0.047     | BRAC1 high, Naive low | 0  | 0  | 0  | 7  | 7  | 2  |
| Cleft lip and palate transmembrane protein 1 OS=Homo sapiens GN=CLPTM1 PE=1 SV=1                  | CLPT1_HUMAN           | 76 kDa  | 0.72      | []                    | 1  | 3  | 2  | 2  | 4  | 6  |
| Coagulation factor V OS=Homo sapiens GN=F5 PE=1 SV=1                                              | A0A0A0MRJ7_HUMAN (+1) | 252 kDa | 0.4       | []                    | 1  | 1  | 13 | 2  | 0  | 5  |
| Coatamer protein complex, subunit zeta 1, isoform CRA_a OS=Homo sapiens GN=COPZ1 PE=4 SV=1        | A0A024RB72_HUMAN (+3) | 20 kDa  | 0.13      | []                    | 0  | 0  | 0  | 1  | 0  | 2  |
| Coatamer subunit alpha OS=Homo sapiens GN=COPA PE=1 SV=2                                          | COPA_HUMAN            | 138 kDa | 0.58      | []                    | 2  | 2  | 4  | 3  | 2  | 18 |
| Coatamer subunit beta OS=Homo sapiens GN=COPB1 PE=1 SV=3                                          | COPB_HUMAN            | 107 kDa | 0.32      | []                    | 0  | 0  | 4  | 3  | 2  | 13 |
| Coatamer subunit beta' OS=Homo sapiens GN=COPB2 PE=1 SV=2                                         | COPB2_HUMAN           | 102 kDa | 0.29      | []                    | 0  | 0  | 2  | 1  | 2  | 11 |
| Coatamer subunit epsilon OS=Homo sapiens GN=COPE PE=1 SV=3                                        | COPE_HUMAN (+3)       | 34 kDa  | 0.87      | []                    | 0  | 0  | 1  | 0  | 0  | 2  |
| Coatamer subunit gamma-1 OS=Homo sapiens GN=COPG1 PE=1 SV=1                                       | COPG1_HUMAN           | 98 kDa  | 0.34      | []                    | 1  | 0  | 1  | 2  | 1  | 19 |
| Coatamer subunit gamma-2 OS=Homo sapiens GN=COPG2 PE=1 SV=1                                       | COPG2_HUMAN           | 98 kDa  | 0.51      | []                    | 1  | 0  | 0  | 0  | 0  | 10 |
| Cofilin-1 OS=Homo sapiens GN=CFL1 PE=1 SV=3                                                       | COF1_HUMAN (+1)       | 19 kDa  | 0.25      | []                    | 7  | 5  | 6  | 19 | 24 | 10 |
| Cofilin-2 OS=Homo sapiens GN=CFL2 PE=1 SV=1                                                       | COF2_HUMAN (+1)       | 19 kDa  | 0.24      | []                    | 1  | 3  | 3  | 0  | 4  | 0  |
| Coiled-coil domain-containing protein 47 OS=Homo sapiens GN=CCDC47 PE=1 SV=1                      | CCD47_HUMAN           | 56 kDa  | 0.23      | []                    | 0  | 1  | 1  | 1  | 2  | 4  |
| Coiled-coil-helix-coiled-coil-helix domain containing 3 OS=Homo sapiens GN=CHCHD3 PE=4 SV=1       | A4D1N4_HUMAN (+4)     | 26 kDa  | 0.36      | []                    | 2  | 0  | 2  | 1  | 1  | 1  |
| Cold shock domain-containing protein E1 OS=Homo sapiens GN=CSDE1 PE=1 SV=2                        | CSDE1_HUMAN (+4)      | 89 kDa  | 0.37      | []                    | 0  | 0  | 0  | 0  | 0  | 2  |
| Collagen alpha-1(I) chain OS=Homo sapiens GN=COL1A1 PE=1 SV=5                                     | COL1A1_HUMAN          | 139 kDa | < 0.00010 | BRAC1 low, Naive high | 12 | 15 | 18 | 0  | 0  | 0  |
| tr D3DXT7 D3DXT7_HUMAN Collagen, type I, alpha 1, isoform CRA_a OS=Homo sapiens GN=COL1A1...      | D3DXT7_HUMAN          | ?       | < 0.00010 | BRAC1 low, Naive high | 10 | 12 | 17 | 0  | 0  | 0  |
| Collagen alpha-1(VI) chain OS=Homo sapiens GN=COL6A1 PE=1 SV=3                                    | COL6A1_HUMAN (+1)     | 109 kDa | 0.00019   | BRAC1 low, Naive high | 7  | 8  | 9  | 0  | 0  | 0  |
| Collagen alpha-1(XII) chain OS=Homo sapiens GN=COL12A1 PE=1 SV=2                                  | COL12A1_HUMAN (+1)    | 333 kDa | 0.12      | []                    | 10 | 13 | 0  | 0  | 0  | 0  |
| Collagen alpha-2(I) chain OS=Homo sapiens GN=COL1A2 PE=1 SV=7                                     | COL1A2_HUMAN (+1)     | 129 kDa | 0.00018   | BRAC1 low, Naive high | 6  | 7  | 12 | 0  | 0  | 0  |
| Collagen alpha-2(VI) chain OS=Homo sapiens GN=COL6A2 PE=1 SV=4                                    | COL6A2_HUMAN          | 109 kDa | 0.022     | BRAC1 low, Naive high | 3  | 6  | 3  | 0  | 0  | 0  |
| Collagen alpha-3(VI) chain OS=Homo sapiens GN=COL6A3 PE=1 SV=5                                    | COL6A3_HUMAN (+1)     | 344 kDa | 0.043     | BRAC1 low, Naive high | 39 | 52 | 16 | 0  | 0  | 0  |
| tr B7ZW00 B7ZW00_HUMAN COL6A3 protein OS=Homo sapiens GN=COL6A3 PE=2 SV=1                         | B7ZW00_HUMAN (+1)     | ?       | 0.045     | BRAC1 low, Naive high | 38 | 50 | 15 | 0  | 0  | 0  |
| Collectin-12 OS=Homo sapiens GN=COLE12 PE=1 SV=3                                                  | COL12_HUMAN           | 82 kDa  | 0.0064    | BRAC1 low, Naive high | 2  | 3  | 2  | 0  | 0  | 0  |
| Complement C5 OS=Homo sapiens GN=C5 PE=1 SV=4                                                     | CO5_HUMAN (+1)        | 188 kDa | 0.0044    | BRAC1 low, Naive high | 3  | 2  | 4  | 0  | 0  | 0  |
| Complement component 9, isoform CRA_a OS=Homo sapiens GN=C9 PE=4 SV=1                             | A0A024R035_HUMAN (+1) | 63 kDa  | 0.14      | []                    | 5  | 5  | 1  | 2  | 2  | 0  |
| Complement decay-accelerating factor OS=Homo sapiens GN=CD55 PE=1 SV=1                            | B1AP13_HUMAN (+3)     | 49 kDa  | < 0.00010 | BRAC1 high, Naive low | 0  | 0  | 0  | 5  | 6  | 8  |
| Conserved oligomeric Golgi complex subunit 1 OS=Homo sapiens GN=COG1 PE=1 SV=1                    | COG1_HUMAN (+4)       | 109 kDa | 0.37      | []                    | 0  | 0  | 0  | 0  | 0  | 3  |
| Conserved oligomeric Golgi complex subunit 2 OS=Homo sapiens GN=COG2 PE=1 SV=1                    | COG2_HUMAN (+2)       | 83 kDa  | 0.37      | []                    | 0  | 0  | 0  | 0  | 0  | 3  |
| Conserved oligomeric Golgi complex subunit 3 OS=Homo sapiens GN=COG3 PE=1 SV=3                    | COG3_HUMAN            | 94 kDa  | 0.13      | []                    | 0  | 0  | 0  | 1  | 0  | 2  |
| Conserved oligomeric Golgi complex subunit 5 OS=Homo sapiens GN=COG5 PE=1 SV=3                    | COG5_HUMAN            | 93 kDa  | 0.37      | []                    | 0  | 0  | 0  | 0  | 0  | 2  |
| Conserved oligomeric Golgi complex subunit 7 OS=Homo sapiens GN=COG7 PE=1 SV=1                    | COG7_HUMAN            | 86 kDa  | 0.37      | []                    | 0  | 0  | 0  | 0  | 0  | 3  |
| Constitutive coactivator of PPAR-gamma-like protein 1 OS=Homo sapiens GN=FAM120A PE=1 SV=2        | F120A_HUMAN           | 122 kDa | 0.042     | BRAC1 low, Naive high | 1  | 2  | 2  | 0  | 1  | 2  |
| Copine-1 OS=Homo sapiens GN=CPNE1 PE=1 SV=1                                                       | B0QZ18_HUMAN (+1)     | 60 kDa  | 0.042     | BRAC1 high, Naive low | 0  | 0  | 4  | 8  | 6  | 8  |
| Copine-3 OS=Homo sapiens GN=CPNE3 PE=1 SV=1                                                       | CPNE3_HUMAN (+1)      | 60 kDa  | 0.093     | []                    | 1  | 6  | 7  | 0  | 0  | 3  |
| Core histone macro-H2A.1 OS=Homo sapiens GN=H2AFY PE=1 SV=4                                       | H2AY_HUMAN            | 40 kDa  | 0.71      | []                    | 1  | 0  | 2  | 1  | 1  | 5  |

|                                                                                                                                    |                         |         |         |                       |    |    |    |    |    |    |
|------------------------------------------------------------------------------------------------------------------------------------|-------------------------|---------|---------|-----------------------|----|----|----|----|----|----|
| Coronin OS=Homo sapiens GN=CORO1B PE=3 SV=1                                                                                        | A0A024R5K1_HUMAN (+1)   | 54 kDa  | 0.14    | []                    | 1  | 2  | 2  | 8  | 9  | 3  |
| Coronin OS=Homo sapiens GN=CORO1C PE=3 SV=1                                                                                        | A0A024RB15_HUMAN (+4)   | 53 kDa  | 0.11    | []                    | 8  | 12 | 12 | 15 | 10 | 7  |
| Cortactin isoform a variant (Fragment) OS=Homo sapiens PE=1 SV=1                                                                   | Q53HG7_HUMAN (+1)       | 62 kDa  | 0.45    | []                    | 1  | 3  | 11 | 11 | 10 | 10 |
| cDNA FLJ54828, highly similar to Src substrate cortactin OS=Homo sapiens PE=2 SV=1                                                 | B4E358_HUMAN            | 35 kDa  | 0.37    | []                    | 0  | 0  | 0  | 3  | 0  | 0  |
| Creatine kinase B-type OS=Homo sapiens GN=CKB PE=1 SV=1                                                                            | KCRB_HUMAN (+2)         | 43 kDa  | 0.37    | []                    | 0  | 0  | 0  | 0  | 0  | 5  |
| Crk-like protein OS=Homo sapiens GN=CRKL PE=1 SV=1                                                                                 | CRKL_HUMAN              | 34 kDa  | 0.37    | []                    | 0  | 0  | 0  | 0  | 0  | 3  |
| Cullin-4B OS=Homo sapiens GN=CUL4B PE=1 SV=4                                                                                       | CUL4B_HUMAN (+1)        | 104 kDa | 0.37    | []                    | 0  | 0  | 3  | 0  | 0  | 0  |
| Cysteine and glycine-rich protein 2 OS=Homo sapiens GN=CSR2 PE=1 SV=3                                                              | CSR2_HUMAN (+1)         | 21 kDa  | 0.017   | BRAC1 low, Naive high | 1  | 1  | 3  | 0  | 0  | 0  |
| Cysteine-rich protein 2 OS=Homo sapiens GN=CRIP2 PE=1 SV=1                                                                         | CRIP2_HUMAN (+2)        | 22 kDa  | 0.01    | BRAC1 high, Naive low | 0  | 0  | 0  | 5  | 5  | 3  |
| Cystine/glutamate transporter OS=Homo sapiens GN=SLC7A11 PE=1 SV=1                                                                 | XCT_HUMAN               | 55 kDa  | 0.37    | []                    | 0  | 0  | 0  | 0  | 0  | 2  |
| Cytochrome P450 2S1 OS=Homo sapiens GN=CYP2S1 PE=1 SV=2                                                                            | CP2S1_HUMAN             | 56 kDa  | 0.031   | BRAC1 high, Naive low | 0  | 0  | 0  | 2  | 1  | 1  |
| Cytochrome b5 OS=Homo sapiens GN=CYB5A PE=1 SV=2                                                                                   | CYB5_HUMAN (+2)         | 15 kDa  | 0.98    | []                    | 1  | 1  | 1  | 2  | 2  | 1  |
| Cytochrome b5 type B OS=Homo sapiens GN=CYB5B PE=1 SV=2                                                                            | CYB5B_HUMAN (+3)        | 16 kDa  | 0.38    | []                    | 0  | 1  | 3  | 2  | 2  | 9  |
| Cytochrome b reductase 1 OS=Homo sapiens GN=CYBRD1 PE=1 SV=1                                                                       | CYBR1_HUMAN             | 32 kDa  | 0.37    | []                    | 0  | 0  | 2  | 0  | 0  | 0  |
| Cytochrome b-c1 complex subunit 1, mitochondrial OS=Homo sapiens GN=UQCRC1 PE=1 SV=3                                               | QCR1_HUMAN              | 53 kDa  | 0.96    | []                    | 1  | 3  | 7  | 1  | 7  | 10 |
| Cytochrome b-c1 complex subunit 2, mitochondrial OS=Homo sapiens GN=UQCRC2 PE=1 SV=1                                               | H3BRG4_HUMAN (+1)       | 45 kDa  | 0.77    | []                    | 1  | 3  | 10 | 3  | 5  | 12 |
| Cytochrome b-c1 complex subunit Rieske, mitochondrial OS=Homo sapiens GN=UQCRCF51 PE=1 SV=2                                        | UCR1_HUMAN              | 30 kDa  | 0.55    | []                    | 0  | 0  | 2  | 0  | 0  | 1  |
| Cytochrome c1, heme protein, mitochondrial OS=Homo sapiens GN=CYC1 PE=1 SV=3                                                       | CY1_HUMAN (+1)          | 35 kDa  | 0.47    | []                    | 1  | 0  | 1  | 1  | 1  | 5  |
| Cytochrome c (Fragment) OS=Homo sapiens GN=CYCS PE=1 SV=1                                                                          | C9JFR7_HUMAN (+3)       | 11 kDa  | 0.0075  | BRAC1 low, Naive high | 2  | 2  | 2  | 1  | 0  | 0  |
| Cytochrome c oxidase subunit 2 OS=Homo sapiens GN=COX2 PE=3 SV=1                                                                   | A0A023QZ25_HUMAN (+258) | 26 kDa  | 0.44    | []                    | 2  | 0  | 1  | 1  | 1  | 0  |
| Cytochrome c oxidase subunit 5B, mitochondrial OS=Homo sapiens GN=COX5B PE=1 SV=2                                                  | COX5B_HUMAN (+2)        | 14 kDa  | 0.37    | []                    | 0  | 0  | 0  | 0  | 2  | 0  |
| Cytochrome c oxidase subunit 7A2, mitochondrial OS=Homo sapiens GN=COX7A2 PE=1 SV=1                                                | CX7A2_HUMAN (+4)        | 9 kDa   | 0.37    | []                    | 0  | 0  | 0  | 0  | 2  | 0  |
| Cytoplasmic FMR1-interacting protein 1 (Fragment) OS=Homo sapiens GN=CYFIP1 PE=1 SV=1                                              | A0A087WVZ5_HUMAN (+1)   | 21 kDa  | 0.37    | []                    | 0  | 0  | 0  | 0  | 1  | 0  |
| Cytoplasmic FMR1-interacting protein 1 OS=Homo sapiens GN=CYFIP1 PE=1 SV=1                                                         | CYFIP1_HUMAN (+1)       | 145 kDa | 0.15    | []                    | 3  | 2  | 4  | 17 | 16 | 5  |
| Cytoplasmic FMR1-interacting protein 2 OS=Homo sapiens GN=CYFIP2 PE=1 SV=1                                                         | E7EVJ5_HUMAN            | 143 kDa | 0.032   | BRAC1 high, Naive low | 0  | 0  | 0  | 8  | 6  | 3  |
| Cytoplasmic dynein 1 heavy chain 1 OS=Homo sapiens GN=DYNC1H1 PE=1 SV=5                                                            | DYHC1_HUMAN             | 532 kDa | 0.58    | []                    | 7  | 18 | 6  | 10 | 9  | 24 |
| Cytoskeleton-associated protein 4, isoform CRA_c OS=Homo sapiens GN=CKAP4 PE=4 SV=1                                                | A0A024RBH2_HUMAN (+1)   | 66 kDa  | 0.017   | BRAC1 low, Naive high | 57 | 77 | 42 | 4  | 7  | 7  |
| Cytoskeleton-associated protein 5 OS=Homo sapiens GN=CKAP5 PE=1 SV=3                                                               | CKAP5_HUMAN             | 226 kDa | 0.15    | []                    | 0  | 1  | 1  | 2  | 2  | 2  |
| Cytosol aminopeptidase OS=Homo sapiens GN=LAP3 PE=1 SV=3                                                                           | AMPL_HUMAN (+1)         | 56 kDa  | 0.62    | []                    | 1  | 1  | 3  | 2  | 1  | 10 |
| Cytosolic 10-formyltetrahydrofolate dehydrogenase OS=Homo sapiens GN=ALDH1L1 PE=1 SV=2                                             | AL1L1_HUMAN (+2)        | 99 kDa  | 0.37    | []                    | 0  | 0  | 0  | 0  | 0  | 2  |
| Cytosolic purine 5'-nucleotidase OS=Homo sapiens GN=NT5C2 PE=1 SV=1                                                                | SNTC_HUMAN (+1)         | 65 kDa  | 0.87    | []                    | 0  | 0  | 1  | 0  | 0  | 2  |
| D-3-phosphoglycerate dehydrogenase OS=Homo sapiens GN=PHGDH PE=1 SV=4                                                              | SERA_HUMAN              | 57 kDa  | 0.91    | []                    | 2  | 2  | 3  | 1  | 4  | 7  |
| DBH-like monoxygenase protein 1 OS=Homo sapiens GN=MOXD1 PE=1 SV=1                                                                 | MOXD1_HUMAN             | 70 kDa  | 0.12    | []                    | 1  | 0  | 2  | 0  | 0  | 0  |
| DDRGK domain-containing protein 1 OS=Homo sapiens GN=DDRGK1 PE=1 SV=2                                                              | DDRGK_HUMAN             | 36 kDa  | 0.58    | []                    | 1  | 4  | 2  | 2  | 1  | 6  |
| DEAD (Asp-Glu-Ala-Asp) box polypeptide 48, isoform CRA_a OS=Homo sapiens GN=DDX48 PE=3 SV=1                                        | A0A024R8WO_HUMAN (+1)   | 47 kDa  | 0.38    | []                    | 1  | 1  | 2  | 2  | 2  | 8  |
| DERP12 (Dermal papilla derived protein 12) OS=Homo sapiens GN=derp12 PE=2 SV=1                                                     | Q8TE01_HUMAN            | 38 kDa  | 0.027   | BRAC1 low, Naive high | 25 | 29 | 16 | 7  | 7  | 15 |
| DNA-(apurinic or apyrimidinic site) lyase OS=Homo sapiens GN=APEX1 PE=1 SV=2                                                       | APEX1_HUMAN (+3)        | 36 kDa  | 0.07    | []                    | 0  | 0  | 1  | 1  | 2  | 3  |
| DNA-dependent protein kinase catalytic subunit OS=Homo sapiens GN=PRKDC PE=1 SV=3                                                  | PRKDC_HUMAN             | 469 kDa | 0.045   | BRAC1 high, Naive low | 0  | 0  | 0  | 1  | 4  | 6  |
| Dedicator of cytokinesis protein 7 OS=Homo sapiens GN=DOCK7 PE=1 SV=4                                                              | DOCK7_HUMAN             | 243 kDa | 0.04    | BRAC1 high, Naive low | 0  | 0  | 0  | 2  | 3  | 1  |
| Dehydrogenase/reductase SDR family member 7B OS=Homo sapiens GN=DHRS7B PE=1 SV=2                                                   | DRS7B_HUMAN (+2)        | 35 kDa  | 0.37    | []                    | 0  | 0  | 0  | 0  | 0  | 2  |
| Delta(3,5)-Delta(2,4)-dienoyl-CoA isomerase, mitochondrial OS=Homo sapiens GN=ECH1 PE=1 SV=2                                       | ECH1_HUMAN              | 36 kDa  | 0.12    | []                    | 2  | 0  | 2  | 3  | 9  | 9  |
| Delta(14)-sterol reductase OS=Homo sapiens GN=TM7SF2 PE=2 SV=3                                                                     | ERG24_HUMAN (+2)        | 46 kDa  | 0.37    | []                    | 0  | 0  | 0  | 0  | 0  | 2  |
| Delta(24)-sterol reductase OS=Homo sapiens GN=DHCR24 PE=1 SV=2                                                                     | DHC24_HUMAN (+1)        | 60 kDa  | 0.17    | []                    | 0  | 0  | 0  | 1  | 0  | 3  |
| Delta-1-pyrroline-5-carboxylate synthase OS=Homo sapiens GN=ALDH18A1 PE=1 SV=2                                                     | P5CS_HUMAN              | 87 kDa  | 0.04    | BRAC1 low, Naive high | 4  | 4  | 5  | 5  | 1  | 3  |
| Delta-sarcoglycan OS=Homo sapiens GN=SGCD PE=1 SV=2                                                                                | SGCD_HUMAN              | 32 kDa  | 0.00091 | BRAC1 low, Naive high | 1  | 1  | 2  | 0  | 0  | 0  |
| Deoxynucleoside triphosphate triphosphohydrolase SAMHD1 OS=Homo sapiens GN=SAMHD1 PE=1 SV=2                                        | SAMH1_HUMAN             | 72 kDa  | 0.22    | []                    | 0  | 1  | 2  | 0  | 0  | 1  |
| Deoxyribonuclease-1-like 1 (Fragment) OS=Homo sapiens GN=DNASE1L1 PE=1 SV=1                                                        | A6QRJ0_HUMAN (+2)       | 24 kDa  | 0.48    | []                    | 1  | 0  | 3  | 2  | 0  | 1  |
| Desmoglein-2 OS=Homo sapiens GN=DSG2 PE=1 SV=2                                                                                     | DSG2_HUMAN              | 122 kDa | 0.023   | BRAC1 high, Naive low | 0  | 0  | 0  | 11 | 11 | 5  |
| Desmoplakin OS=Homo sapiens GN=DSP PE=1 SV=3                                                                                       | DESP_HUMAN              | 332 kDa | 0.028   | BRAC1 high, Naive low | 0  | 0  | 0  | 2  | 4  | 2  |
| Developmentally-regulated GTP-binding protein 1 OS=Homo sapiens GN=DRG1 PE=1 SV=1                                                  | DRG1_HUMAN              | 41 kDa  | 0.013   | BRAC1 high, Naive low | 0  | 0  | 0  | 2  | 3  | 6  |
| Dihydroliipoamide S-succinyltransferase (E2 component of 2-oxo-glutarate complex), isoform CRA_a OS=Homo sapiens GN=DLST PE=3 SV=1 | A0A024R6C9_HUMAN (+1)   | 49 kDa  | 0.0092  | BRAC1 low, Naive high | 4  | 3  | 5  | 1  | 1  | 3  |
| Dihydroliipoamide dehydrogenase OS=Homo sapiens GN=DLD PE=4 SV=1                                                                   | A0A024R713_HUMAN (+3)   | 54 kDa  | 0.074   | []                    | 2  | 2  | 5  | 2  | 3  | 2  |
| Dihydroxyrimidinase-related protein 2 OS=Homo sapiens GN=DPYSL2 PE=1 SV=1                                                          | DPYL2_HUMAN (+1)        | 62 kDa  | 0.35    | []                    | 0  | 1  | 5  | 1  | 0  | 1  |
| Dihydroxyacetone phosphate acyltransferase OS=Homo sapiens GN=GNPAT PE=1 SV=1                                                      | GNPAT_HUMAN (+1)        | 77 kDa  | 0.37    | []                    | 0  | 0  | 0  | 0  | 0  | 9  |
| Dimethylarginine dimethylaminohydrolase 1, isoform CRA_b OS=Homo sapiens GN=DDAH1 PE=2 SV=1                                        | B1AKK2_HUMAN (+1)       | 31 kDa  | 0.93    | []                    | 0  | 2  | 0  | 1  | 1  | 2  |
| Dinucleotide oxidase disulfide thiol exchanger 3 superfamily member 3 OS=Homo sapiens PE=2 SV=1                                    | A0A024QYS2_HUMAN (+2)   | 68 kDa  | 0.4     | []                    | 0  | 1  | 1  | 1  | 1  | 5  |
| Dipeptidase 1 OS=Homo sapiens GN=DPEP1 PE=1 SV=3                                                                                   | DPEP1_HUMAN (+1)        | 46 kDa  | 0.001   | BRAC1 high, Naive low | 0  | 0  | 0  | 6  | 9  | 9  |
| Dipeptidyl peptidase 2 OS=Homo sapiens GN=DPP7 PE=1 SV=3                                                                           | DPP2_HUMAN              | 54 kDa  | 0.37    | []                    | 0  | 0  | 0  | 0  | 0  | 2  |
| Dipeptidyl peptidase 3 OS=Homo sapiens GN=DPP3 PE=1 SV=2                                                                           | DPP3_HUMAN (+3)         | 83 kDa  | 0.00037 | BRAC1 high, Naive low | 0  | 0  | 0  | 4  | 3  | 5  |
| Dipeptidyl peptidase 4 OS=Homo sapiens GN=DPP4 PE=1 SV=2                                                                           | DPP4_HUMAN              | 88 kDa  | 0.031   | BRAC1 low, Naive high | 3  | 3  | 6  | 2  | 4  | 1  |
| Discoidin domain receptor family, member 1, isoform CRA_b OS=Homo sapiens GN=DDR1 PE=4 SV=1                                        | A0A024RCJ0_HUMAN (+3)   | 102 kDa | 0.039   | BRAC1 high, Naive low | 0  | 0  | 0  | 3  | 3  | 1  |
| Discoidin domain-containing receptor 2 OS=Homo sapiens GN=DDR2 PE=1 SV=2                                                           | DDR2_HUMAN (+2)         | 97 kDa  | 0.0036  | BRAC1 low, Naive high | 1  | 2  | 3  | 0  | 0  | 0  |



|                                                                                                                  |                       |         |          |                       |    |    |    |    |    |     |
|------------------------------------------------------------------------------------------------------------------|-----------------------|---------|----------|-----------------------|----|----|----|----|----|-----|
| Disintegrin and metalloproteinase domain-containing protein 15 OS=Homo sapiens GN=ADAM15 PE=1 SV=4               | ADA15_HUMAN (+2)      | 93 kDa  | 0.16     | []                    | 0  | 0  | 0  | 1  | 2  | 0   |
| Disks large homolog 1 OS=Homo sapiens GN=DLG1 PE=1 SV=1                                                          | A0A0C4DFT3_HUMAN      | 100 kDa | 0.01     | BRAC1 high, Naive low | 1  | 2  | 1  | 10 | 8  | 7   |
| Disks large homolog 3 OS=Homo sapiens GN=DLG3 PE=1 SV=2                                                          | DLG3_HUMAN (+2)       | 90 kDa  | 0.063    | []                    | 0  | 0  | 0  | 4  | 5  | 1   |
| DnaJ (Hsp40) homolog, subfamily A, member 2, isoform CRA_a OS=Homo sapiens GN=DNAJA2 PE=3 SV=1                   | A0A024R6S1_HUMAN (+1) | 46 kDa  | 0.17     | []                    | 0  | 0  | 0  | 1  | 1  | 7   |
| DnaJ (Hsp40) homolog, subfamily C, member 3 OS=Homo sapiens GN=DNAJC3 PE=2 SV=1                                  | A8KA82_HUMAN (+1)     | 58 kDa  | 0.16     | []                    | 0  | 1  | 1  | 1  | 4  | 4   |
| DnaJ homolog subfamily A member 1 OS=Homo sapiens GN=DNAJA1 PE=1 SV=2                                            | DNAJA1_HUMAN          | 45 kDa  | 0.044    | BRAC1 high, Naive low | 0  | 0  | 1  | 2  | 4  | 8   |
| DnaJ homolog subfamily A member 3, mitochondrial OS=Homo sapiens GN=DNAJA3 PE=1 SV=2                             | DNAJ3_HUMAN (+3)      | 52 kDa  | 0.37     | []                    | 0  | 0  | 0  | 0  | 0  | 3   |
| DnaJ homolog subfamily B member 4 OS=Homo sapiens GN=DNAJB4 PE=1 SV=1                                            | DNAJB4_HUMAN (+1)     | 38 kDa  | 0.37     | []                    | 0  | 0  | 2  | 0  | 0  | 0   |
| DnaJ homolog subfamily B member 11 OS=Homo sapiens GN=DNAJB11 PE=1 SV=1                                          | DJB11_HUMAN           | 41 kDa  | 0.39     | []                    | 0  | 1  | 2  | 1  | 2  | 7   |
| DnaJ homolog subfamily C member 2 OS=Homo sapiens GN=DNAJC2 PE=1 SV=4                                            | DNJC2_HUMAN           | 72 kDa  | 0.37     | []                    | 0  | 0  | 0  | 0  | 0  | 3   |
| DnaJ homolog subfamily C member 5 OS=Homo sapiens GN=DNAJC5 PE=1 SV=1                                            | DNJC5_HUMAN           | 22 kDa  | 0.99     | []                    | 0  | 0  | 4  | 1  | 0  | 5   |
| DnaJ homolog subfamily C member 10 OS=Homo sapiens GN=DNAJC10 PE=1 SV=2                                          | DJC10_HUMAN           | 91 kDa  | 0.37     | []                    | 0  | 0  | 1  | 1  | 0  | 7   |
| DnaJ homolog subfamily C member 11 OS=Homo sapiens GN=DNAJC11 PE=1 SV=2                                          | DJC11_HUMAN           | 63 kDa  | 0.73     | []                    | 0  | 0  | 2  | 0  | 2  | 2   |
| DnaJ homolog subfamily C member 13 OS=Homo sapiens GN=DNAJC13 PE=1 SV=5                                          | DJC13_HUMAN (+1)      | 254 kDa | 0.35     | []                    | 0  | 1  | 3  | 0  | 0  | 2   |
| Dolichol-phosphate mannosyltransferase subunit 1 OS=Homo sapiens GN=DPM1 PE=1 SV=1                               | DPM1_HUMAN (+2)       | 30 kDa  | 0.45     | []                    | 0  | 0  | 2  | 1  | 1  | 4   |
| Dolichyl-diphosphooligosaccharide--protein glycosyltransferase 48 kDa subunit OS=Homo sapiens GN=DDOST PE=3 SV=1 | A0A024RAD5_HUMAN (+2) | 51 kDa  | 0.5      | []                    | 8  | 7  | 8  | 7  | 10 | 18  |
| Dolichyl-diphosphooligosaccharide--protein glycosyltransferase subunit 1 OS=Homo sapiens GN=RPN1 PE=1 SV=1       | RPN1_HUMAN            | 69 kDa  | 0.27     | []                    | 11 | 20 | 21 | 15 | 20 | 35  |
| Dolichyl-diphosphooligosaccharide--protein glycosyltransferase subunit 2 OS=Homo sapiens GN=RPN2 PE=1 SV=3       | RPN2_HUMAN            | 69 kDa  | 0.86     | []                    | 7  | 16 | 17 | 14 | 23 | 26  |
| Dolichyl-diphosphooligosaccharide--protein glycosyltransferase subunit STT3B OS=Homo sapiens GN=STT3B PE=1 SV=1  | STT3B_HUMAN           | 94 kDa  | 0.056    | []                    | 0  | 1  | 1  | 2  | 3  | 3   |
| Dolichyl-phosphate beta-glucosyltransferase OS=Homo sapiens GN=ALG5 PE=1 SV=1                                    | ALG5_HUMAN (+2)       | 37 kDa  | 0.5      | []                    | 0  | 0  | 1  | 0  | 1  | 2   |
| Drebrin OS=Homo sapiens GN=DBN1 PE=1 SV=4                                                                        | DREB_HUMAN            | 71 kDa  | 0.039    | BRAC1 low, Naive high | 3  | 5  | 6  | 4  | 5  | 2   |
| Drebrin-like protein OS=Homo sapiens GN=DBNL PE=1 SV=1                                                           | DBNL_HUMAN            | 48 kDa  | 0.29     | []                    | 3  | 3  | 4  | 3  | 6  | 3   |
| Drebrin-like protein OS=Homo sapiens GN=DBNL PE=1 SV=1                                                           | B4DD6_HUMAN           | 46 kDa  | 0.66     | []                    | 2  | 3  | 3  | 3  | 6  | 2   |
| Drug-sensitive protein 1 OS=Homo sapiens GN=YAG1 PE=2 SV=1                                                       | Q9N2Z3_HUMAN          | 15 kDa  | 0.046    | BRAC1 low, Naive high | 39 | 33 | 20 | 5  | 6  | 8   |
| Dynactin 2 (P50), isoform CRA_b OS=Homo sapiens GN=DCTN2 PE=2 SV=1                                               | A8K8J9_HUMAN (+4)     | 34 kDa  | 0.0013   | BRAC1 low, Naive high | 2  | 2  | 3  | 1  | 0  | 0   |
| Dynactin subunit 1 OS=Homo sapiens GN=DCTN1 PE=1 SV=3                                                            | DCTN1_HUMAN (+2)      | 142 kDa | 0.12     | []                    | 1  | 1  | 5  | 1  | 0  | 0   |
| Dynamin-1 OS=Homo sapiens GN=DNM1 PE=1 SV=1                                                                      | A0A0D9SFB1_HUMAN (+3) | 94 kDa  | 0.01     | BRAC1 high, Naive low | 0  | 0  | 0  | 2  | 4  | 3   |
| Dynamin-2 OS=Homo sapiens GN=DNM2 PE=1 SV=2                                                                      | DYN2_HUMAN            | 98 kDa  | 0.00022  | BRAC1 high, Naive low | 0  | 0  | 1  | 13 | 11 | 18  |
| Dynamin-like 120 kDa protein, mitochondrial OS=Homo sapiens GN=OPA1 PE=1 SV=1                                    | E5KLJ5_HUMAN (+11)    | 118 kDa | 0.5      | []                    | 0  | 0  | 1  | 2  | 0  | 1   |
| Dynein assembly factor 5, axonemal OS=Homo sapiens GN=DNAAF5 PE=1 SV=4                                           | DAAF5_HUMAN           | 94 kDa  | 0.25     | []                    | 0  | 0  | 0  | 0  | 1  | 6   |
| Cytoplasmic dynein 1 light intermediate chain 1 OS=Homo sapiens GN=DYNC1L1 PE=1 SV=3                             | DC1L1_HUMAN (+3)      | 57 kDa  | 0.37     | []                    | 0  | 0  | 1  | 0  | 0  | 0   |
| Dynein, cytoplasmic 1, light intermediate chain 2, isoform CRA_a OS=Homo sapiens GN=DYNC1L2 PE=4 SV=1            | A0A024R6Z0_HUMAN (+1) | 54 kDa  | 0.29     | []                    | 1  | 2  | 2  | 1  | 0  | 4   |
| E3 SUMO-protein ligase RanBP2 OS=Homo sapiens GN=RANBP2 PE=1 SV=2                                                | RBP2_HUMAN            | 358 kDa | 0.37     | []                    | 0  | 0  | 0  | 0  | 0  | 3   |
| E3 UFM1-protein ligase 1 OS=Homo sapiens GN=UFL1 PE=1 SV=2                                                       | UFL1_HUMAN            | 90 kDa  | 0.3      | []                    | 1  | 0  | 1  | 1  | 2  | 6   |
| E3 ubiquitin-protein ligase DTX3L OS=Homo sapiens GN=DTX3L PE=1 SV=1                                             | DTX3L_HUMAN           | 84 kDa  | 0.048    | BRAC1 high, Naive low | 0  | 1  | 1  | 2  | 3  | 5   |
| E3 ubiquitin-protein ligase NEDD4-like OS=Homo sapiens GN=NEDD4L PE=1 SV=2                                       | NED4L_HUMAN           | 112 kDa | 0.15     | []                    | 0  | 0  | 0  | 2  | 0  | 5   |
| E3 ubiquitin-protein ligase UBR4 OS=Homo sapiens GN=UBR4 PE=1 SV=1                                               | UBR4_HUMAN            | 574 kDa | 0.37     | []                    | 0  | 0  | 0  | 0  | 0  | 6   |
| E3 ubiquitin/ISG15 ligase TRIM25 OS=Homo sapiens GN=TRIM25 PE=1 SV=2                                             | TRI25_HUMAN           | 71 kDa  | 0.37     | []                    | 0  | 0  | 1  | 1  | 0  | 5   |
| Tripartite motif-containing 25 variant (Fragment) OS=Homo sapiens PE=1 SV=1                                      | Q59GW5_HUMAN          | 72 kDa  | 0.67     | []                    | 0  | 0  | 2  | 1  | 0  | 4   |
| EFR3A protein (Fragment) OS=Homo sapiens GN=EFR3A PE=2 SV=1                                                      | A2VDI4_HUMAN (+1)     | 76 kDa  | 0.041    | BRAC1 low, Naive high | 2  | 2  | 3  | 2  | 3  | 2   |
| EH domain-binding protein 1-like protein 1 OS=Homo sapiens GN=EHB1L1 PE=1 SV=2                                   | EH1L1_HUMAN           | 162 kDa | 0.031    | BRAC1 high, Naive low | 0  | 0  | 0  | 2  | 1  | 1   |
| EH domain-containing protein 1 OS=Homo sapiens GN=EHD1 PE=1 SV=1                                                 | A0A024R571_HUMAN (+2) | 62 kDa  | 0.41     | []                    | 3  | 5  | 9  | 4  | 8  | 10  |
| EH domain-containing protein 3 OS=Homo sapiens GN=EHD3 PE=1 SV=1                                                 | A0A0C4DH83_HUMAN (+1) | 62 kDa  | 0.46     | []                    | 0  | 0  | 5  | 1  | 0  | 0   |
| EH domain-containing protein 2 OS=Homo sapiens GN=EHD2 PE=1 SV=2                                                 | EHD2_HUMAN (+1)       | 61 kDa  | 0.0013   | BRAC1 low, Naive high | 12 | 10 | 15 | 0  | 0  | 0   |
| EH-domain containing 4, isoform CRA_a OS=Homo sapiens GN=EHD4 PE=4 SV=1                                          | A0A024R9N6_HUMAN (+2) | 61 kDa  | 0.022    | BRAC1 high, Naive low | 2  | 1  | 2  | 7  | 5  | 8   |
| EIF2AK2 protein OS=Homo sapiens GN=EIF2AK2 PE=2 SV=1                                                             | B7ZKK7_HUMAN (+1)     | 62 kDa  | 0.68     | []                    | 0  | 2  | 4  | 2  | 2  | 9   |
| EIF4G1 protein OS=Homo sapiens GN=EIF4G1 PE=2 SV=1                                                               | B2RU06_HUMAN (+8)     | 176 kDa | 0.31     | []                    | 0  | 2  | 2  | 2  | 3  | 11  |
| ELAV-like protein 1 OS=Homo sapiens GN=ELAVL1 PE=1 SV=2                                                          | ELAV1_HUMAN           | 36 kDa  | 0.87     | []                    | 0  | 0  | 1  | 0  | 0  | 2   |
| EMILIN-1 OS=Homo sapiens GN=EMILIN1 PE=1 SV=2                                                                    | EMIL1_HUMAN (+1)      | 107 kDa | 0.0081   | BRAC1 low, Naive high | 3  | 2  | 3  | 0  | 0  | 0   |
| ER lumen protein-retaining receptor 1 OS=Homo sapiens GN=KDELR1 PE=1 SV=1                                        | ERD21_HUMAN           | 25 kDa  | 0.69     | []                    | 0  | 0  | 1  | 0  | 0  | 3   |
| ER lumen protein-retaining receptor 2 OS=Homo sapiens GN=KDELR2 PE=1 SV=1                                        | ERD22_HUMAN (+1)      | 24 kDa  | 0.37     | []                    | 0  | 0  | 0  | 0  | 0  | 4   |
| ER membrane protein complex subunit 1 OS=Homo sapiens GN=EMC1 PE=1 SV=1                                          | EMC1_HUMAN            | 112 kDa | 0.33     | []                    | 1  | 3  | 4  | 1  | 1  | 6   |
| ER membrane protein complex subunit 3 OS=Homo sapiens GN=EMC3 PE=1 SV=3                                          | EMC3_HUMAN            | 30 kDa  | 0.55     | []                    | 0  | 0  | 2  | 0  | 0  | 1   |
| ER membrane protein complex subunit 7 OS=Homo sapiens GN=EMC7 PE=1 SV=1                                          | EMC7_HUMAN (+2)       | 26 kDa  | 0.69     | []                    | 0  | 1  | 0  | 0  | 1  | 2   |
| ERO1-like protein alpha OS=Homo sapiens GN=ERO1A PE=1 SV=2                                                       | ERO1A_HUMAN           | 54 kDa  | 0.22     | []                    | 3  | 3  | 6  | 2  | 4  | 8   |
| Early endosome antigen 1 OS=Homo sapiens GN=EEA1 PE=1 SV=2                                                       | EEA1_HUMAN            | 162 kDa | 0.37     | []                    | 0  | 0  | 0  | 0  | 0  | 5   |
| Echinoderm microtubule-associated protein-like 4 OS=Homo sapiens GN=EML4 PE=1 SV=3                               | B5MBZ0_HUMAN (+1)     | 110 kDa | <0.00010 | BRAC1 high, Naive low | 0  | 0  | 0  | 4  | 4  | 5   |
| Electron transfer flavoprotein subunit alpha, mitochondrial OS=Homo sapiens GN=ETFA PE=1 SV=1                    | ETFA_HUMAN            | 35 kDa  | 0.18     | []                    | 5  | 5  | 8  | 12 | 15 | 12  |
| Electron transfer flavoprotein subunit beta OS=Homo sapiens GN=ETFB PE=1 SV=3                                    | ETFB_HUMAN            | 28 kDa  | 0.029    | BRAC1 high, Naive low | 0  | 0  | 2  | 3  | 4  | 6   |
| EEF1A1 protein OS=Homo sapiens GN=EEF1A1 PE=2 SV=1                                                               | Q504Z0_HUMAN          | 33 kDa  | 0.29     | []                    | 7  | 8  | 10 | 12 | 18 | 20  |
| Elongation factor 1-alpha 1 OS=Homo sapiens GN=EEF1A1 PE=1 SV=1                                                  | EF1A1_HUMAN (+8)      | 50 kDa  | 0.43     | []                    | 13 | 13 | 24 | 18 | 28 | 107 |
| Elongation factor 1-alpha OS=Homo sapiens GN=PTI-1 PE=2 SV=1                                                     | Q16577_HUMAN          | 43 kDa  | 0.6      | []                    | 6  | 6  | 7  | 8  | 10 | 13  |

|                                                                                                                       |                        |         |          |                       |    |    |    |    |    |    |
|-----------------------------------------------------------------------------------------------------------------------|------------------------|---------|----------|-----------------------|----|----|----|----|----|----|
| tr Q96EB3 Q96EB3_HUMAN EEF1A1 protein (Fragment) OS=Homo sapiens GN=EEF1A1 PE=1 SV=1                                  | Q96EB3_HUMAN           | ?       | 0.37     | []                    | 0  | 0  | 0  | 0  | 1  | 0  |
| Elongation factor 1-delta OS=Homo sapiens GN=EEF1D PE=1 SV=1                                                          | A0A087X1X7_HUMAN (+7)  | 69 kDa  | 0.07     | []                    | 3  | 3  | 5  | 5  | 3  | 4  |
| Elongation factor 1-gamma OS=Homo sapiens GN=EEF1G PE=1 SV=3                                                          | EF1G_HUMAN (+1)        | 50 kDa  | 0.81     | []                    | 5  | 5  | 12 | 10 | 11 | 13 |
| Elongation factor 2 OS=Homo sapiens GN=EEF2 PE=1 SV=4                                                                 | EF2_HUMAN              | 95 kDa  | 0.78     | []                    | 13 | 19 | 23 | 17 | 15 | 57 |
| Elongation factor Tu, mitochondrial OS=Homo sapiens GN=TUFM PE=1 SV=2                                                 | EFTU_HUMAN             | 50 kDa  | 0.037    | BRAC1 low, Naive high | 5  | 7  | 11 | 7  | 8  | 12 |
| Elongation of very long chain fatty acids protein 1 OS=Homo sapiens GN=ELOVL1 PE=1 SV=1                               | ELOV1_HUMAN            | 33 kDa  | 0.16     | []                    | 0  | 0  | 0  | 1  | 2  | 0  |
| Emerin OS=Homo sapiens GN=EMD PE=1 SV=1                                                                               | EMD_HUMAN              | 29 kDa  | 0.12     | []                    | 2  | 2  | 4  | 1  | 1  | 5  |
| Endoglin OS=Homo sapiens GN=ENG PE=1 SV=2                                                                             | EGLN_HUMAN (+3)        | 71 kDa  | 0.017    | BRAC1 low, Naive high | 8  | 12 | 6  | 0  | 0  | 0  |
| tr Q96CG0 Q96CG0_HUMAN ENG protein OS=Homo sapiens GN=ENG PE=2 SV=1                                                   | Q96CG0_HUMAN           | ?       | 0.014    | BRAC1 low, Naive high | 7  | 11 | 6  | 0  | 0  | 0  |
| Endonuclease domain-containing 1 protein OS=Homo sapiens GN=ENDOD1 PE=1 SV=2                                          | ENDD1_HUMAN            | 55 kDa  | 0.49     | []                    | 1  | 2  | 1  | 2  | 2  | 1  |
| Endophilin-B1 OS=Homo sapiens GN=SH3GLB1 PE=1 SV=1                                                                    | A0A087WW40_HUMAN (+1)  | 44 kDa  | 0.03     | BRAC1 high, Naive low | 0  | 0  | 0  | 1  | 1  | 3  |
| Endoplasmic reticulum aminopeptidase 2 OS=Homo sapiens GN=ERAP2 PE=1 SV=2                                             | ERAP2_HUMAN (+1)       | 110 kDa | 0.17     | []                    | 0  | 0  | 0  | 0  | 1  | 3  |
| Endoplasmic reticulum lectin 1 OS=Homo sapiens GN=ERLEC1 PE=1 SV=1                                                    | ERLEC_HUMAN (+1)       | 55 kDa  | 0.98     | []                    | 0  | 0  | 2  | 0  | 0  | 3  |
| Endoplasmic reticulum metalloproteinase 1 OS=Homo sapiens GN=ERMP1 PE=1 SV=2                                          | ERMP1_HUMAN            | 100 kDa | 0.013    | BRAC1 high, Naive low | 0  | 0  | 0  | 8  | 8  | 20 |
| Endoplasmic reticulum resident protein 29 OS=Homo sapiens GN=ERP29 PE=1 SV=4                                          | ERP29_HUMAN (+1)       | 29 kDa  | 0.99     | []                    | 0  | 0  | 4  | 1  | 3  | 1  |
| Endoplasmic reticulum resident protein 44 OS=Homo sapiens GN=ERP44 PE=1 SV=1                                          | ERP44_HUMAN            | 47 kDa  | 0.2      | []                    | 4  | 2  | 3  | 1  | 2  | 5  |
| Endoplasmin OS=Homo sapiens GN=HSP90B1 PE=1 SV=1                                                                      | ENPL_HUMAN (+2)        | 92 kDa  | 0.35     | []                    | 25 | 32 | 23 | 25 | 29 | 58 |
| Endosialin OS=Homo sapiens GN=CD248 PE=1 SV=1                                                                         | CD248_HUMAN            | 81 kDa  | 0.14     | []                    | 1  | 2  | 0  | 0  | 0  | 0  |
| Endothelial cell-selective adhesion molecule OS=Homo sapiens GN=ESAM PE=1 SV=1                                        | ESAM_HUMAN             | 41 kDa  | 0.13     | []                    | 0  | 0  | 0  | 0  | 1  | 2  |
| Endothelial protein C receptor OS=Homo sapiens GN=PROCR PE=1 SV=1                                                     | EPCR_HUMAN             | 27 kDa  | 0.68     | []                    | 0  | 0  | 2  | 1  | 3  | 0  |
| Endothelin-converting enzyme 1 OS=Homo sapiens GN=ECE1 PE=1 SV=2                                                      | ECE1_HUMAN (+3)        | 87 kDa  | 0.75     | []                    | 0  | 3  | 5  | 0  | 3  | 7  |
| Enhancer of mRNA-decapping protein 4 OS=Homo sapiens GN=EDC4 PE=1 SV=1                                                | EDC4_HUMAN             | 152 kDa | 0.37     | []                    | 0  | 0  | 0  | 0  | 0  | 3  |
| Enolase 1, (Alpha), isoform CRA_a OS=Homo sapiens GN=ENO1 PE=2 SV=1                                                   | A0A024R4F1_HUMAN (+1)  | 47 kDa  | 0.11     | []                    | 9  | 9  | 11 | 31 | 31 | 21 |
| Enoyl-CoA delta isomerase 1, mitochondrial OS=Homo sapiens GN=ECI1 PE=1 SV=1                                          | ECI1_HUMAN             | 33 kDa  | 0.89     | []                    | 0  | 0  | 2  | 1  | 1  | 0  |
| Enoyl-CoA delta isomerase 2, mitochondrial OS=Homo sapiens GN=ECI2 PE=1 SV=4                                          | ECI2_HUMAN (+11)       | 44 kDa  | 0.00091  | BRAC1 low, Naive high | 1  | 1  | 2  | 0  | 0  | 0  |
| Enoyl-CoA hydratase, mitochondrial OS=Homo sapiens GN=ECHS1 PE=1 SV=4                                                 | ECHM_HUMAN             | 31 kDa  | 0.039    | BRAC1 high, Naive low | 1  | 2  | 3  | 6  | 8  | 6  |
| Ephrin type-B receptor 4 OS=Homo sapiens GN=EPHB4 PE=1 SV=2                                                           | EPHB4_HUMAN (+3)       | 108 kDa | 0.051    | []                    | 0  | 0  | 0  | 9  | 5  | 3  |
| Receptor protein-tyrosine kinase OS=Homo sapiens GN=EPHB3 PE=4 SV=1                                                   | D3DNT9_HUMAN (+1)      | 106 kDa | 0.13     | []                    | 0  | 0  | 0  | 4  | 3  | 0  |
| Ephrin-B1 OS=Homo sapiens GN=EFNB1 PE=1 SV=1                                                                          | EFNB1_HUMAN            | 38 kDa  | 0.064    | []                    | 0  | 0  | 0  | 10 | 10 | 2  |
| Epidermal growth factor receptor kinase substrate 8 OS=Homo sapiens GN=EPS8 PE=1 SV=1                                 | EPS8_HUMAN             | 92 kDa  | <0.00010 | BRAC1 high, Naive low | 0  | 0  | 0  | 6  | 6  | 9  |
| Epidermal growth factor receptor kinase substrate 8-like protein 1 OS=Homo sapiens GN=EPS8L1 PE=1 SV=3                | ES8L1_HUMAN            | 80 kDa  | 0.11     | []                    | 0  | 0  | 0  | 2  | 2  | 10 |
| Epidermal growth factor receptor kinase substrate 8-like protein 2 OS=Homo sapiens GN=EPS8L2 PE=1 SV=2                | ES8L2_HUMAN            | 81 kDa  | 0.073    | []                    | 0  | 0  | 0  | 2  | 3  | 10 |
| Epidermal growth factor receptor substrate 15 OS=Homo sapiens GN=EPS15 PE=1 SV=2                                      | EPS15_HUMAN            | 99 kDa  | 0.44     | []                    | 0  | 0  | 1  | 2  | 1  | 0  |
| Epididymis luminal protein 113 OS=Homo sapiens GN=HEL113 PE=2 SV=1                                                    | V9HWE1_HUMAN (+1)      | 54 kDa  | 0.0061   | BRAC1 low, Naive high | 52 | 86 | 59 | 0  | 2  | 0  |
| cDNA FLJ34494 fis, clone HLUNG2005030, highly similar to VIMENTIN OS=Homo sapiens PE=2 SV=1                           | B3RRK8_HUMAN           | 47 kDa  | 0.0088   | BRAC1 low, Naive high | 39 | 75 | 50 | 0  | 0  | 0  |
| Epididymis secretory protein Li 96 (Fragment) OS=Homo sapiens GN=HEL-S-96 PE=2 SV=1                                   | A0A0K0K1J6_HUMAN (+3)  | 16 kDa  | 0.0068   | BRAC1 high, Naive low | 0  | 0  | 0  | 2  | 3  | 2  |
| Epididymis secretory protein Li 276 OS=Homo sapiens GN=HEL-S-276 PE=2 SV=1                                            | A0A0K0K1K4_HUMAN (+1)  | 28 kDa  | 0.88     | []                    | 1  | 0  | 4  | 2  | 1  | 4  |
| Epididymis secretory sperm binding protein Li 129m OS=Homo sapiens GN=HEL-S-129m PE=2 SV=1                            | A0A0K0K1L8_HUMAN (+1)  | 29 kDa  | 0.7      | []                    | 0  | 2  | 5  | 1  | 5  | 8  |
| Epididymis secretory sperm binding protein Li 284 OS=Homo sapiens GN=HEL-S-284 PE=2 SV=1                              | A0A0K0K1H7_HUMAN (+4)  | 86 kDa  | 0.0085   | BRAC1 low, Naive high | 9  | 7  | 10 | 3  | 4  | 2  |
| Epididymis tissue sperm binding protein Li 3a OS=Homo sapiens PE=1 SV=1                                               | E9KL35_HUMAN (+1)      | 35 kDa  | 0.12     | []                    | 5  | 5  | 6  | 7  | 7  | 7  |
| Epididymis tissue sperm binding protein Li 14m OS=Homo sapiens PE=2 SV=1                                              | E9KL44_HUMAN (+1)      | 83 kDa  | 0.013    | BRAC1 low, Naive high | 5  | 8  | 10 | 4  | 6  | 10 |
| Epiplakin OS=Homo sapiens GN=EPPK1 PE=1 SV=2                                                                          | A0A075B730_HUMAN (+1)  | 553 kDa | 0.2      | []                    | 0  | 0  | 0  | 4  | 3  | 30 |
| Epiplakin OS=Homo sapiens GN=EPPK1 PE=1 SV=2                                                                          | EPIPL_HUMAN            | 556 kDa | 0.19     | []                    | 0  | 0  | 0  | 4  | 3  | 29 |
| Epithelial cell adhesion molecule OS=Homo sapiens GN=EPCAM PE=1 SV=2                                                  | EPCAM_HUMAN            | 35 kDa  | 0.019    | BRAC1 high, Naive low | 0  | 0  | 1  | 30 | 36 | 16 |
| Epoxide hydrolase 1 OS=Homo sapiens GN=EPHX1 PE=1 SV=1                                                                | HYEP_HUMAN (+1)        | 53 kDa  | 0.53     | []                    | 1  | 0  | 3  | 2  | 1  | 9  |
| Equilibrative nucleoside transporter 1 OS=Homo sapiens GN=SLC29A1 PE=1 SV=3                                           | S29A1_HUMAN            | 50 kDa  | 0.17     | []                    | 0  | 0  | 0  | 1  | 5  | 1  |
| Erythrocyte band 7 integral membrane protein OS=Homo sapiens GN=STOM PE=1 SV=3                                        | STOM_HUMAN (+1)        | 32 kDa  | 0.0097   | BRAC1 low, Naive high | 8  | 8  | 6  | 0  | 0  | 0  |
| Ethanolamine-phosphate cytidyltransferase OS=Homo sapiens GN=PCYT2 PE=1 SV=1                                          | PCY2_HUMAN (+1)        | 44 kDa  | 0.37     | []                    | 0  | 0  | 0  | 0  | 0  | 3  |
| Ethanolaminephosphotransferase 1 OS=Homo sapiens GN=EPT1 PE=1 SV=1                                                    | A0A087WW58_HUMAN (+5)  | 45 kDa  | 0.028    | BRAC1 high, Naive low | 0  | 0  | 0  | 1  | 2  | 1  |
| Ethylmalonic encephalopathy 1, isoform CRA_a OS=Homo sapiens GN=ETHE1 PE=2 SV=1                                       | B2RCZ7_HUMAN (+2)      | 25 kDa  | 0.19     | []                    | 1  | 2  | 2  | 2  | 2  | 0  |
| Eukaryotic translation elongation factor 1 beta 2, isoform CRA_a OS=Homo sapiens GN=EEF1B2 PE=3 SV=1                  | A0A024R3W7_HUMAN (+1)  | 25 kDa  | 0.68     | []                    | 2  | 0  | 2  | 2  | 2  | 1  |
| Eukaryotic translation initiation factor 2 subunit 1 OS=Homo sapiens GN=EIF2S1 PE=1 SV=3                              | IF2A_HUMAN (+1)        | 36 kDa  | 0.22     | []                    | 1  | 1  | 1  | 1  | 1  | 2  |
| Eukaryotic translation initiation factor 2 subunit 2 OS=Homo sapiens GN=EIF2S2 PE=1 SV=2                              | IF2B_HUMAN (+2)        | 38 kDa  | 0.65     | []                    | 0  | 0  | 3  | 0  | 1  | 1  |
| Eukaryotic translation initiation factor 2, subunit 3 gamma, 52kDa, isoform CRA_a OS=Homo sapiens GN=EIF2S3 PE=4 SV=1 | A0A024RB4_Y_HUMAN (+3) | 51 kDa  | 0.61     | []                    | 2  | 3  | 1  | 4  | 4  | 5  |
| Eukaryotic translation initiation factor 2A OS=Homo sapiens GN=EIF2A PE=1 SV=3                                        | EIF2A_HUMAN (+1)       | 65 kDa  | 0.11     | []                    | 0  | 0  | 0  | 1  | 1  | 5  |
| Eukaryotic translation initiation factor 3 subunit A OS=Homo sapiens GN=EIF3A PE=1 SV=1                               | EIF3A_HUMAN (+2)       | 167 kDa | 0.35     | []                    | 2  | 1  | 2  | 3  | 3  | 7  |
| Eukaryotic translation initiation factor 3 subunit B OS=Homo sapiens GN=EIF3B PE=3 SV=1                               | A0A024R821_HUMAN (+3)  | 92 kDa  | 0.4      | []                    | 1  | 1  | 1  | 1  | 2  | 10 |
| Eukaryotic translation initiation factor 3 subunit C OS=Homo sapiens GN=EIF3C PE=1 SV=1                               | EIF3C_HUMAN (+6)       | 105 kDa | 0.94     | []                    | 1  | 1  | 1  | 0  | 2  | 4  |
| Eukaryotic translation initiation factor 3 subunit E OS=Homo sapiens GN=EIF3E PE=1 SV=1                               | EIF3E_HUMAN (+2)       | 52 kDa  | 0.55     | []                    | 0  | 0  | 2  | 0  | 0  | 1  |
| Eukaryotic translation initiation factor 3 subunit F OS=Homo sapiens GN=EIF3F PE=2 SV=1                               | B3KSH1_HUMAN (+2)      | 39 kDa  | 0.71     | []                    | 2  | 1  | 2  | 2  | 2  | 4  |
| Eukaryotic translation initiation factor 3 subunit L OS=Homo sapiens GN=EIF3L PE=1 SV=1                               | B0QY89_HUMAN (+2)      | 71 kDa  | 0.59     | []                    | 2  | 2  | 2  | 1  | 2  | 6  |
| Eukaryotic translation initiation factor 3 subunit M OS=Homo sapiens GN=EIF3M PE=1 SV=1                               | EIF3M_HUMAN            | 43 kDa  | 0.86     | []                    | 1  | 1  | 1  | 1  | 0  | 6  |

|                                                                                                                        |                       |         |           |                       |     |     |     |     |     |    |
|------------------------------------------------------------------------------------------------------------------------|-----------------------|---------|-----------|-----------------------|-----|-----|-----|-----|-----|----|
| Eukaryotic translation initiation factor 4B OS=Homo sapiens GN=EIF4B PE=1 SV=2                                         | IF4B_HUMAN (+3)       | 69 kDa  | 0.87      | []                    | 0   | 0   | 1   | 0   | 0   | 2  |
| Eukaryotic translation initiation factor 4E OS=Homo sapiens GN=EIF4E PE=1 SV=2                                         | IF4E_HUMAN            | 25 kDa  | 0.37      | []                    | 0   | 0   | 0   | 0   | 0   | 4  |
| Eukaryotic translation initiation factor 4H OS=Homo sapiens GN=EIF4H PE=1 SV=5                                         | IF4H_HUMAN            | 27 kDa  | 0.13      | []                    | 0   | 0   | 0   | 0   | 1   | 2  |
| Eukaryotic translation initiation factor 5A (Fragment) OS=Homo sapiens GN=EIF5A PE=1 SV=6                              | I3L397_HUMAN (+2)     | 16 kDa  | 0.59      | []                    | 0   | 0   | 3   | 1   | 1   | 6  |
| Eukaryotic translation initiation factor 5B OS=Homo sapiens GN=EIF5B PE=1 SV=1                                         | A0A087WUT6_HUMAN (+4) | 139 kDa | 0.36      | []                    | 0   | 0   | 1   | 1   | 0   | 10 |
| Eukaryotic translation initiation factor 6 OS=Homo sapiens GN=EIF6 PE=1 SV=1                                           | IF6_HUMAN             | 27 kDa  | 0.00025   | BRAC1 high, Naive low | 0   | 0   | 0   | 3   | 4   | 5  |
| Exocyst complex component 1, isoform CRA_a OS=Homo sapiens GN=EXOC1 PE=4 SV=1                                          | A0A024RDA1_HUMAN (+2) | 100 kDa | 0.85      | []                    | 0   | 1   | 1   | 1   | 0   | 3  |
| Exocyst complex component 2, isoform CRA_a OS=Homo sapiens GN=EXOC2 PE=4 SV=1                                          | A0A024QZT2_HUMAN (+2) | 104 kDa | 0.5       | []                    | 0   | 0   | 1   | 1   | 0   | 2  |
| Exocyst complex component 3 OS=Homo sapiens GN=EXOC3 PE=1 SV=2                                                         | EXOC3_HUMAN (+2)      | 87 kDa  | 0.69      | []                    | 0   | 0   | 1   | 0   | 0   | 3  |
| Exocyst complex component 4 OS=Homo sapiens GN=EXOC4 PE=1 SV=1                                                         | EXOC4_HUMAN (+1)      | 111 kDa | 0.3       | []                    | 2   | 1   | 3   | 3   | 5   | 6  |
| Exocyst complex component 7 OS=Homo sapiens GN=EXOC7 PE=1 SV=3                                                         | EXOC7_HUMAN (+4)      | 83 kDa  | 0.37      | []                    | 0   | 0   | 0   | 0   | 0   | 2  |
| Exocyst complex component 8 OS=Homo sapiens GN=EXOC8 PE=1 SV=2                                                         | EXOC8_HUMAN           | 82 kDa  | 0.12      | []                    | 0   | 0   | 0   | 0   | 2   | 2  |
| Exportin-1 OS=Homo sapiens GN=XPO1 PE=1 SV=1                                                                           | XPO1_HUMAN            | 123 kDa | 0.37      | []                    | 0   | 0   | 0   | 0   | 0   | 10 |
| Exportin-2 OS=Homo sapiens GN=CSE1L PE=1 SV=3                                                                          | XPO2_HUMAN            | 110 kDa | 0.098     | []                    | 0   | 0   | 1   | 5   | 5   | 22 |
| Exportin-5 OS=Homo sapiens GN=XPO5 PE=1 SV=1                                                                           | XPO5_HUMAN (+1)       | 136 kDa | 0.37      | []                    | 0   | 0   | 0   | 0   | 0   | 2  |
| Exportin-T OS=Homo sapiens GN=XPOT PE=1 SV=2                                                                           | XPOT_HUMAN (+2)       | 110 kDa | 0.37      | []                    | 0   | 0   | 0   | 0   | 0   | 2  |
| Extended synaptotagmin-2 (Fragment) OS=Homo sapiens GN=ESYT2 PE=1 SV=1                                                 | H7BXI1_HUMAN          | 98 kDa  | 0.36      | []                    | 3   | 1   | 4   | 5   | 5   | 9  |
| FACT complex subunit SSRP1 OS=Homo sapiens GN=SSRP1 PE=1 SV=1                                                          | SSRP1_HUMAN (+1)      | 81 kDa  | 0.37      | []                    | 0   | 0   | 0   | 0   | 0   | 3  |
| FAD synthase OS=Homo sapiens GN=FLAD1 PE=1 SV=1                                                                        | FAD1_HUMAN (+2)       | 65 kDa  | 0.37      | []                    | 0   | 0   | 0   | 0   | 0   | 3  |
| FARSB protein (Fragment) OS=Homo sapiens GN=FARSB PE=2 SV=2                                                            | Q9BR63_HUMAN (+1)     | 66 kDa  | 0.64      | []                    | 1   | 0   | 1   | 1   | 1   | 3  |
| FERM, RhoGEF and pleckstrin domain-containing protein 1 OS=Homo sapiens GN=FARP1 PE=1 SV=1                             | FARP1_HUMAN           | 119 kDa | 0.095     | []                    | 4   | 3   | 5   | 4   | 4   | 6  |
| FERM, RhoGEF and pleckstrin domain-containing protein 2 OS=Homo sapiens GN=FARP2 PE=1 SV=3                             | FARP2_HUMAN           | 120 kDa | 0.12      | []                    | 0   | 0   | 0   | 4   | 5   | 0  |
| Family with sequence similarity 49, member B, isoform CRA_a OS=Homo sapiens GN=FAM49B PE=4 SV=1                        | A0A024R9G4_HUMAN (+2) | 37 kDa  | 0.0092    | BRAC1 high, Naive low | 0   | 0   | 1   | 3   | 4   | 7  |
| Family with sequence similarity 62 (C2 domain containing), member A, isoform CRA_a OS=Homo sapiens GN=FAM62A PE=4 SV=1 | A0A024RB16_HUMAN (+3) | 124 kDa | 0.0032    | BRAC1 low, Naive high | 11  | 13  | 20  | 11  | 10  | 19 |
| Far upstream element-binding protein 1 OS=Homo sapiens GN=FUBP1 PE=1 SV=3                                              | FUBP1_HUMAN (+4)      | 68 kDa  | 0.37      | []                    | 0   | 0   | 0   | 0   | 0   | 2  |
| Fascin OS=Homo sapiens GN=FSCN1 PE=1 SV=3                                                                              | FSCN1_HUMAN (+1)      | 55 kDa  | 0.0017    | BRAC1 low, Naive high | 3   | 6   | 7   | 0   | 0   | 0  |
| Fatty acid synthase OS=Homo sapiens GN=FASN PE=1 SV=3                                                                  | FAS_HUMAN             | 273 kDa | 0.029     | BRAC1 high, Naive low | 0   | 0   | 2   | 15  | 19  | 51 |
| Fatty aldehyde dehydrogenase OS=Homo sapiens GN=ALDH3A2 PE=1 SV=1                                                      | AL3A2_HUMAN (+3)      | 55 kDa  | 0.018     | BRAC1 high, Naive low | 0   | 0   | 0   | 2   | 2   | 1  |
| Fermitin family homolog 2 OS=Homo sapiens GN=FERMT2 PE=1 SV=1                                                          | FERM2_HUMAN (+3)      | 78 kDa  | 0.12      | []                    | 1   | 1   | 6   | 0   | 0   | 0  |
| Fibulin-2 OS=Homo sapiens GN=FBLN2 PE=1 SV=2                                                                           | FBLN2_HUMAN (+2)      | 127 kDa | 0.025     | BRAC1 low, Naive high | 1   | 3   | 2   | 0   | 0   | 0  |
| Filamin-A OS=Homo sapiens GN=FLNA PE=1 SV=4                                                                            | FLNA_HUMAN            | 281 kDa | 0.00083   | BRAC1 low, Naive high | 102 | 117 | 134 | 55  | 40  | 26 |
| Filamin-B OS=Homo sapiens GN=FLNB PE=1 SV=2                                                                            | FLNB_HUMAN            | 278 kDa | 0.05      | []                    | 13  | 12  | 8   | 103 | 86  | 48 |
| Filamin-C OS=Homo sapiens GN=FLNC PE=1 SV=3                                                                            | FLNC_HUMAN            | 291 kDa | < 0.00010 | BRAC1 low, Naive high | 43  | 48  | 63  | 5   | 3   | 1  |
| Flavin reductase (NADPH) OS=Homo sapiens GN=BLVRB PE=1 SV=3                                                            | BLVRB_HUMAN (+1)      | 22 kDa  | 0.5       | []                    | 0   | 0   | 1   | 1   | 0   | 2  |
| Flotillin-1 OS=Homo sapiens GN=FLOT1 PE=1 SV=3                                                                         | FLOT1_HUMAN (+2)      | 47 kDa  | 0.023     | BRAC1 high, Naive low | 4   | 4   | 8   | 13  | 13  | 14 |
| Focal adhesion kinase 1 OS=Homo sapiens GN=PTK2 PE=1 SV=2                                                              | FAK1_HUMAN (+1)       | 119 kDa | 0.37      | []                    | 0   | 0   | 0   | 0   | 0   | 2  |
| Fragile X mental retardation syndrome-related protein 1 OS=Homo sapiens GN=FXR1 PE=1 SV=3                              | FXR1_HUMAN (+9)       | 70 kDa  | 0.77      | []                    | 0   | 0   | 2   | 0   | 0   | 5  |
| Fructose-1,6-bisphosphatase 1 OS=Homo sapiens GN=FBP1 PE=1 SV=5                                                        | F16P1_HUMAN (+1)      | 37 kDa  | 0.13      | []                    | 0   | 0   | 0   | 3   | 2   | 0  |
| Fructose-bisphosphate aldolase A OS=Homo sapiens GN=ALDOA PE=1 SV=2                                                    | ALDOA_HUMAN (+1)      | 39 kDa  | 0.51      | []                    | 20  | 23  | 31  | 40  | 33  | 40 |
| Fructose-bisphosphate aldolase OS=Homo sapiens GN=ALDOC PE=3 SV=1                                                      | A0A024QZ64_HUMAN (+4) | 39 kDa  | 0.011     | BRAC1 high, Naive low | 5   | 7   | 10  | 12  | 14  | 17 |
| Fumarate hydratase, mitochondrial OS=Homo sapiens GN=FH PE=1 SV=3                                                      | FUMH_HUMAN            | 55 kDa  | 0.03      | BRAC1 low, Naive high | 1   | 3   | 3   | 1   | 0   | 1  |
| GDH/6PGL endoplasmic bifunctional protein OS=Homo sapiens GN=H6PD PE=1 SV=2                                            | G6PE_HUMAN (+1)       | 89 kDa  | 0.46      | []                    | 2   | 1   | 0   | 1   | 0   | 2  |
| GDP-L-fucose synthase OS=Homo sapiens GN=TSTA3 PE=1 SV=1                                                               | FCL_HUMAN (+1)        | 36 kDa  | 0.37      | []                    | 0   | 0   | 0   | 0   | 0   | 2  |
| GDP-fucose protein O-fucosyltransferase 2 OS=Homo sapiens GN=POFUT2 PE=1 SV=3                                          | OFUT2_HUMAN (+1)      | 50 kDa  | 0.78      | []                    | 0   | 0   | 2   | 0   | 0   | 2  |
| GIPC PDZ domain containing family, member 1, isoform CRA_a OS=Homo sapiens GN=GIPC1 PE=4 SV=1                          | A0A024R7I0_HUMAN (+2) | 36 kDa  | 0.15      | []                    | 0   | 1   | 0   | 2   | 2   | 9  |
| GRAM domain-containing protein 3 OS=Homo sapiens GN=GRAMD3 PE=1 SV=1                                                   | GRAM3_HUMAN (+2)      | 48 kDa  | 0.37      | []                    | 0   | 4   | 0   | 0   | 0   | 0  |
| GTP-binding nuclear protein Ran OS=Homo sapiens GN=RRAN PE=1 SV=1                                                      | B5MDFS_HUMAN (+1)     | 26 kDa  | 0.29      | []                    | 0   | 0   | 2   | 2   | 1   | 4  |
| GTP-binding protein 1 OS=Homo sapiens GN=GTPBP1 PE=1 SV=3                                                              | GTPB1_HUMAN (+1)      | 72 kDa  | 0.37      | []                    | 0   | 0   | 0   | 0   | 0   | 3  |
| GTP-binding protein SAR1B OS=Homo sapiens GN=SAR1B PE=1 SV=1                                                           | SAR1B_HUMAN (+2)      | 22 kDa  | 0.58      | []                    | 0   | 1   | 1   | 0   | 0   | 2  |
| GTP-AMP phosphotransferase AK3, mitochondrial OS=Homo sapiens GN=AK3 PE=1 SV=4                                         | KAD3_HUMAN (+3)       | 26 kDa  | 0.14      | []                    | 3   | 2   | 1   | 0   | 2   | 0  |
| Galectin OS=Homo sapiens GN=hCG_22119 PE=4 SV=1                                                                        | A0A024R693_HUMAN (+3) | 26 kDa  | 0.53      | []                    | 2   | 2   | 2   | 7   | 6   | 1  |
| Galectin-1 OS=Homo sapiens GN=LGALS1 PE=1 SV=2                                                                         | LEG1_HUMAN            | 15 kDa  | 0.0096    | BRAC1 low, Naive high | 3   | 6   | 4   | 0   | 0   | 0  |
| Galectin-4 OS=Homo sapiens GN=LGALS4 PE=1 SV=1                                                                         | LEG4_HUMAN (+1)       | 36 kDa  | 0.057     | []                    | 0   | 0   | 2   | 104 | 113 | 26 |
| Gamma-adducin OS=Homo sapiens GN=ADD3 PE=1 SV=1                                                                        | ADDG_HUMAN (+2)       | 79 kDa  | 0.0014    | BRAC1 high, Naive low | 0   | 0   | 0   | 3   | 2   | 3  |
| Gamma-glutamyltransferase 5 OS=Homo sapiens GN=GGT5 PE=1 SV=2                                                          | GGT5_HUMAN (+2)       | 62 kDa  | 0.13      | []                    | 0   | 1   | 2   | 0   | 0   | 0  |
| Gamma-interferon-inducible protein 16 OS=Homo sapiens GN=IFI16 PE=1 SV=3                                               | IF16_HUMAN (+3)       | 88 kDa  | 0.37      | []                    | 0   | 0   | 2   | 0   | 0   | 0  |
| Gamma-synuclein OS=Homo sapiens GN=SNCG PE=1 SV=1                                                                      | Q6FHG5_HUMAN (+1)     | 13 kDa  | 0.028     | BRAC1 high, Naive low | 0   | 0   | 0   | 1   | 2   | 1  |
| Gamma-tubulin complex component 3 OS=Homo sapiens GN=TUBGCP3 PE=1 SV=2                                                 | GCP3_HUMAN            | 104 kDa | 0.37      | []                    | 0   | 0   | 0   | 0   | 0   | 4  |
| Gap junction alpha-1 protein OS=Homo sapiens GN=GJA1 PE=1 SV=2                                                         | CXA1_HUMAN (+5)       | 43 kDa  | 0.0021    | BRAC1 low, Naive high | 1   | 2   | 2   | 0   | 0   | 0  |
| Gasdermin-D OS=Homo sapiens GN=GSDMD PE=1 SV=1                                                                         | GSDMD_HUMAN (+2)      | 53 kDa  | 0.37      | []                    | 0   | 0   | 0   | 0   | 0   | 2  |
| Gem-associated protein 5 OS=Homo sapiens GN=GEMIN5 PE=1 SV=3                                                           | GEMI5_HUMAN (+1)      | 169 kDa | 0.37      | []                    | 0   | 0   | 0   | 0   | 0   | 2  |
| Glia-derived nexin OS=Homo sapiens GN=SERPINE2 PE=1 SV=1                                                               | GDN_HUMAN (+3)        | 44 kDa  | 0.14      | []                    | 1   | 2   | 0   | 0   | 0   | 0  |

|                                                                                                                     |                       |         |           |                       |    |    |    |     |    |    |
|---------------------------------------------------------------------------------------------------------------------|-----------------------|---------|-----------|-----------------------|----|----|----|-----|----|----|
| Glucosamine (N-acetyl)-6-sulfatase (Sanfilippo disease IIID), isoform CRA_a OS=Homo sapiens GN=GNS PE=4 SV=1        | A0A024RBC5_HUMAN (+7) | 62 kDa  | 0.5       | []                    | 0  | 0  | 1  | 1   | 0  | 2  |
| Glucosaminyl (N-acetyl) transferase 3, mucin type, isoform CRA_a OS=Homo sapiens GN=GCNT3 PE=4 SV=1                 | A0A024R5T9_HUMAN (+2) | 51 kDa  | 0.038     | BRAC1 high, Naive low | 0  | 0  | 0  | 1   | 4  | 5  |
| Glucose-6-phosphate 1-dehydrogenase OS=Homo sapiens PE=2 SV=1                                                       | A8K8D9_HUMAN (+3)     | 59 kDa  | 0.61      | []                    | 4  | 3  | 5  | 6   | 6  | 12 |
| Glucose-6-phosphate isomerase (Fragment) OS=Homo sapiens GN=GPI PE=1 SV=1                                           | A0A0A0MTS2_HUMAN (+2) | 65 kDa  | 0.0043    | BRAC1 high, Naive low | 1  | 1  | 5  | 15  | 16 | 28 |
| Glucosylceramidase OS=Homo sapiens GN=GBA PE=1 SV=3                                                                 | GLCM_HUMAN (+5)       | 60 kDa  | 0.14      | []                    | 1  | 7  | 4  | 0   | 0  | 3  |
| GLUD1 protein (Fragment) OS=Homo sapiens GN=GLUD1 PE=2 SV=1                                                         | Q14400_HUMAN          | 29 kDa  | 0.73      | []                    | 1  | 0  | 4  | 2   | 3  | 0  |
| Glutamate dehydrogenase OS=Homo sapiens PE=2 SV=1                                                                   | B4DMF5_HUMAN (+2)     | 57 kDa  | 0.087     | []                    | 5  | 6  | 6  | 5   | 8  | 6  |
| Glutamate-rich WD repeat-containing protein 1 OS=Homo sapiens GN=GRWD1 PE=1 SV=1                                    | GRWD1_HUMAN (+4)      | 49 kDa  | 0.37      | []                    | 0  | 0  | 0  | 0   | 0  | 2  |
| Glutaminase kidney isoform, mitochondrial OS=Homo sapiens GN=GLS PE=1 SV=1                                          | GLSK_HUMAN (+1)       | 73 kDa  | < 0.00010 | BRAC1 low, Naive high | 4  | 6  | 7  | 0   | 0  | 0  |
| tr B3KM58 B3KM58_HUMAN cDNA FLJ10358 fis, clone NT2RM2001238, highly similar to Glutaminase...                      | B3KM58_HUMAN          | ?       | 0.034     | BRAC1 low, Naive high | 1  | 2  | 5  | 0   | 0  | 0  |
| Glutamine--fructose-6-phosphate aminotransferase [isomerizing] 1 OS=Homo sapiens GN=GFPT1 PE=1 SV=3                 | GFPT1_HUMAN           | 79 kDa  | 0.34      | []                    | 2  | 2  | 3  | 5   | 3  | 24 |
| Glutamine--tRNA ligase OS=Homo sapiens GN=QARS PE=1 SV=1                                                            | SYQ_HUMAN             | 88 kDa  | 0.5       | []                    | 0  | 1  | 3  | 1   | 1  | 14 |
| Glutaminyl-peptide cyclotransferase-like protein OS=Homo sapiens GN=QPCTL PE=1 SV=1                                 | K7EQG1_HUMAN (+1)     | 14 kDa  | 0.13      | []                    | 0  | 0  | 0  | 1   | 0  | 2  |
| Glutaredoxin-3 OS=Homo sapiens GN=GLRX3 PE=1 SV=2                                                                   | GLRX3_HUMAN           | 37 kDa  | 0.37      | []                    | 0  | 0  | 0  | 0   | 0  | 2  |
| Glutathione S-transferase P OS=Homo sapiens GN=GSTP1 PE=1 SV=2                                                      | GSTP1_HUMAN (+2)      | 23 kDa  | 0.073     | []                    | 1  | 0  | 3  | 14  | 11 | 5  |
| Glutathione S-transferase pi (Fragment) OS=Homo sapiens GN=GSTP1 PE=2 SV=1                                          | C7DJS2_HUMAN          | 17 kDa  | 0.019     | BRAC1 high, Naive low | 0  | 0  | 0  | 5   | 8  | 4  |
| Glutathione S-transferase kappa 1 OS=Homo sapiens GN=GSTK1 PE=1 SV=1                                                | E9PFN5_HUMAN (+2)     | 22 kDa  | 0.82      | []                    | 1  | 1  | 1  | 2   | 1  | 2  |
| Glyceraldehyde-3-phosphate dehydrogenase OS=Homo sapiens GN=GAPDH PE=1 SV=3                                         | G3P_HUMAN (+1)        | 36 kDa  | 0.11      | []                    | 26 | 34 | 57 | 53  | 40 | 38 |
| Glycerol-3-phosphate dehydrogenase OS=Homo sapiens PE=2 SV=1                                                        | A8K1Z2_HUMAN (+2)     | 81 kDa  | 0.52      | []                    | 0  | 3  | 3  | 1   | 1  | 4  |
| Glycogen [starch] synthase, muscle OS=Homo sapiens GN=GYS1 PE=1 SV=2                                                | GYS1_HUMAN (+2)       | 84 kDa  | 0.37      | []                    | 0  | 0  | 0  | 0   | 0  | 6  |
| Glycogen phosphorylase, brain form OS=Homo sapiens GN=PYGB PE=1 SV=5                                                | PYGB_HUMAN            | 97 kDa  | 0.14      | []                    | 0  | 0  | 4  | 9   | 8  | 42 |
| Glycyl-tRNA synthetase OS=Homo sapiens GN=GARS PE=3 SV=1                                                            | A0A090N8G0_HUMAN (+1) | 78 kDa  | 0.75      | []                    | 1  | 2  | 6  | 3   | 4  | 8  |
| Glycylpeptide N-tetradecanoyltransferase 1 OS=Homo sapiens GN=NMT1 PE=1 SV=2                                        | NMT1_HUMAN (+1)       | 57 kDa  | 0.37      | []                    | 0  | 0  | 0  | 0   | 0  | 2  |
| Glypican-1 OS=Homo sapiens GN=GPC1 PE=1 SV=2                                                                        | GPC1_HUMAN (+3)       | 62 kDa  | 0.37      | []                    | 0  | 2  | 0  | 0   | 0  | 0  |
| Golgi apparatus protein 1 OS=Homo sapiens GN=GLG1 PE=1 SV=2                                                         | GLSG1_HUMAN           | 135 kDa | 0.015     | BRAC1 high, Naive low | 1  | 1  | 1  | 4   | 5  | 4  |
| Golgi integral membrane protein 4 OS=Homo sapiens GN=GOLIM4 PE=1 SV=1                                               | GOLI4_HUMAN (+1)      | 82 kDa  | 0.37      | []                    | 0  | 0  | 3  | 0   | 0  | 0  |
| Golgi phosphoprotein 3 OS=Homo sapiens GN=GOLPH3 PE=1 SV=1                                                          | GOLP3_HUMAN (+4)      | 34 kDa  | 0.37      | []                    | 0  | 0  | 0  | 0   | 0  | 4  |
| Golgi resident protein GCP60 OS=Homo sapiens GN=ACBD3 PE=1 SV=4                                                     | GCP60_HUMAN (+1)      | 61 kDa  | 0.82      | []                    | 0  | 1  | 0  | 0   | 0  | 3  |
| Golgi-associated plant pathogenesis-related protein 1 OS=Homo sapiens GN=GLIPR2 PE=1 SV=3                           | GAPR1_HUMAN (+2)      | 17 kDa  | 0.061     | []                    | 2  | 1  | 1  | 0   | 0  | 0  |
| Golgi-specific brefeldin A-resistance guanine nucleotide exchange factor 1 OS=Homo sapiens GN=GBF1 PE=1 SV=2        | GBF1_HUMAN            | 206 kDa | 0.37      | []                    | 0  | 0  | 0  | 0   | 0  | 2  |
| Golgin subfamily A member 2 OS=Homo sapiens GN=GOLGA2 PE=1 SV=3                                                     | GOGA2_HUMAN (+1)      | 113 kDa | 0.38      | []                    | 1  | 3  | 0  | 0   | 1  | 2  |
| Golgin subfamily B member 1 OS=Homo sapiens GN=GOLGB1 PE=1 SV=2                                                     | GOGB1_HUMAN           | 376 kDa | 0.14      | []                    | 1  | 2  | 0  | 0   | 0  | 0  |
| Grem1-1 OS=Homo sapiens GN=GREM1 PE=1 SV=1                                                                          | GREM1_HUMAN (+2)      | 21 kDa  | 0.017     | BRAC1 low, Naive high | 1  | 1  | 3  | 0   | 0  | 0  |
| Growth factor receptor-bound protein 2 OS=Homo sapiens GN=GRB2 PE=2 SV=1                                            | B0LPF3_HUMAN (+3)     | 25 kDa  | 0.031     | BRAC1 high, Naive low | 0  | 0  | 0  | 2   | 1  | 1  |
| Growth factor receptor-bound protein 7 OS=Homo sapiens GN=GRB7 PE=1 SV=2                                            | GRB7_HUMAN            | 60 kDa  | 0.0027    | BRAC1 high, Naive low | 0  | 0  | 0  | 1   | 1  | 2  |
| Guanine deaminase, isoform CRA_b OS=Homo sapiens GN=GDA PE=4 SV=1                                                   | A0A024R231_HUMAN (+1) | 51 kDa  | 0.0027    | BRAC1 high, Naive low | 0  | 0  | 0  | 1   | 1  | 2  |
| Guanine nucleotide binding protein (G protein), alpha 13, isoform CRA_a OS=Homo sapiens GN=GNA13 PE=4 SV=1          | A0A024R8M0_HUMAN (+1) | 44 kDa  | 0.42      | []                    | 1  | 2  | 3  | 5   | 4  | 3  |
| Guanine nucleotide binding protein (G protein), beta polypeptide 1, isoform CRA_a OS=Homo sapiens GN=GNB1 PE=4 SV=1 | A0A024R056_HUMAN (+2) | 37 kDa  | 0.6       | []                    | 7  | 9  | 10 | 24  | 17 | 10 |
| Guanine nucleotide-binding protein G(i)/G(s)/G(t) subunit beta-2 OS=Homo sapiens GN=GNB2 PE=1 SV=3                  | GBB2_HUMAN (+1)       | 37 kDa  | 0.66      | []                    | 6  | 8  | 11 | 19  | 14 | 12 |
| Guanine nucleotide-binding protein subunit beta-4 OS=Homo sapiens GN=GNB4 PE=1 SV=3                                 | GBB4_HUMAN            | 38 kDa  | 0.75      | []                    | 3  | 3  | 5  | 5   | 7  | 5  |
| Guanine nucleotide binding protein (G protein), q polypeptide, isoform CRA_c OS=Homo sapiens GN=GNAQ PE=4 SV=1      | A0A024R240_HUMAN (+2) | 42 kDa  | 0.37      | []                    | 1  | 3  | 6  | 4   | 2  | 4  |
| Guanine nucleotide-binding protein G(i)/G(s)/G(o) subunit gamma-12 OS=Homo sapiens GN=GNG12 PE=1 SV=3               | GBG12_HUMAN           | 8 kDa   | 0.88      | []                    | 4  | 2  | 2  | 5   | 6  | 2  |
| Guanine nucleotide-binding protein G(i) subunit alpha-1 OS=Homo sapiens GN=GNAI1 PE=1 SV=2                          | GNAI1_HUMAN           | 40 kDa  | 0.23      | []                    | 2  | 2  | 10 | 10  | 11 | 48 |
| Guanine nucleotide-binding protein G(i) subunit alpha-2 OS=Homo sapiens GN=GNAI2 PE=1 SV=3                          | GNAI2_HUMAN           | 40 kDa  | 0.18      | []                    | 12 | 15 | 22 | 27  | 32 | 67 |
| Guanine nucleotide-binding protein G(k) subunit alpha OS=Homo sapiens GN=GNAI3 PE=1 SV=3                            | GNAI3_HUMAN           | 41 kDa  | 0.087     | []                    | 1  | 2  | 9  | 15  | 19 | 55 |
| Guanine nucleotide-binding protein G(s) subunit alpha isoforms XLas OS=Homo sapiens GN=GNAS PE=1 SV=2               | GNAS1_HUMAN (+1)      | 111 kDa | 0.038     | BRAC1 high, Naive low | 1  | 1  | 5  | 28  | 21 | 13 |
| Guanine nucleotide-binding protein subunit alpha-11 OS=Homo sapiens GN=GNA11 PE=1 SV=2                              | GNA11_HUMAN (+1)      | 42 kDa  | 0.68      | []                    | 1  | 5  | 10 | 6   | 8  | 5  |
| Guanine nucleotide-binding protein-like 1 OS=Homo sapiens GN=GNL1 PE=1 SV=2                                         | GNL1_HUMAN (+9)       | 69 kDa  | 0.37      | []                    | 0  | 0  | 0  | 0   | 0  | 2  |
| H.sapiens ras-related Hrab1A protein OS=Homo sapiens GN=RAB1A PE=2 SV=1                                             | Q5U0I6_HUMAN (+1)     | 23 kDa  | 0.065     | []                    | 2  | 1  | 2  | 6   | 7  | 5  |
| H.sapiens ras-related Hrab3B protein OS=Homo sapiens PE=2 SV=1                                                      | A0A0A1HAV6_HUMAN (+1) | 25 kDa  | 0.37      | []                    | 0  | 0  | 3  | 0   | 0  | 0  |
| H/ACA ribonucleoprotein complex subunit 4 OS=Homo sapiens GN=DKC1 PE=1 SV=3                                         | DKC1_HUMAN (+3)       | 58 kDa  | 0.37      | []                    | 0  | 0  | 0  | 0   | 0  | 3  |
| HCG24487, isoform CRA_c OS=Homo sapiens GN=hCG_24487 PE=3 SV=1                                                      | A0A024R261_HUMAN (+5) | 21 kDa  | 0.55      | []                    | 0  | 1  | 3  | 1   | 3  | 5  |
| HCG26477 OS=Homo sapiens GN=RPS28 PE=2 SV=1                                                                         | B2R4R9_HUMAN (+1)     | 8 kDa   | 0.65      | []                    | 2  | 0  | 0  | 1   | 1  | 0  |
| HCG27198, isoform CRA_c OS=Homo sapiens GN=hCG_27198 PE=4 SV=1                                                      | A0A024QZ63_HUMAN (+2) | 231 kDa | 0.016     | BRAC1 high, Naive low | 0  | 0  | 0  | 12  | 6  | 8  |
| cDNA FLJ59649, highly similar to Myosin-18A OS=Homo sapiens PE=2 SV=1                                               | B4E0T8_HUMAN          | 134 kDa | 0.014     | BRAC1 high, Naive low | 0  | 0  | 0  | 10  | 5  | 7  |
| HCG30204, isoform CRA_a OS=Homo sapiens GN=hCG_30204 PE=4 SV=1                                                      | A0A024R0Y2_HUMAN (+2) | 257 kDa | 0.14      | []                    | 0  | 0  | 0  | 3   | 1  | 11 |
| HCG1640809, isoform CRA_b OS=Homo sapiens GN=hCG_1640809 PE=4 SV=1                                                  | A0A024R4N0_HUMAN (+2) | 35 kDa  | 0.15      | []                    | 2  | 2  | 6  | 3   | 3  | 1  |
| HCG1821276, isoform CRA_a OS=Homo sapiens GN=hCG_1821276 PE=4 SV=1                                                  | A0A024RCJ8_HUMAN (+2) | 68 kDa  | 0.62      | []                    | 0  | 0  | 2  | 1   | 0  | 70 |
| HCG1991735, isoform CRA_a OS=Homo sapiens GN=hCG_1991735 PE=4 SV=1                                                  | A0A024RC65_HUMAN (+2) | 189 kDa | 0.053     | []                    | 18 | 24 | 34 | 118 | 97 | 70 |
| HCG1996054, isoform CRA_d OS=Homo sapiens GN=hCG_1996054 PE=3 SV=1                                                  | D3DV69_HUMAN          | 19 kDa  | 0.16      | []                    | 0  | 0  | 0  | 2   | 1  | 0  |
| HCG1998851, isoform CRA_c OS=Homo sapiens GN=hCG_1998851 PE=4 SV=1                                                  | A0A024QZ62_HUMAN (+4) | 47 kDa  | 0.42      | []                    | 3  | 2  | 9  | 10  | 11 | 8  |
| HCG2005638, isoform CRA_a OS=Homo sapiens GN=hCG_2005638 PE=4 SV=1                                                  | A0A024RCM3_HUMAN (+1) | 49 kDa  | 0.15      | []                    | 0  | 0  | 2  | 2   | 2  | 6  |

|                                                                                                                             |                        |         |         |                       |    |    |    |    |    |    |
|-----------------------------------------------------------------------------------------------------------------------------|------------------------|---------|---------|-----------------------|----|----|----|----|----|----|
| HCG2016482, isoform CRA_b OS=Homo sapiens GN=hCG_2016482 PE=4 SV=1                                                          | A0A024RB41_HUMAN (+7)  | 23 kDa  | 0.48    | []                    | 2  | 0  | 3  | 2  | 1  | 2  |
| HCG2032701, isoform CRA_a OS=Homo sapiens GN=hCG_2032701 PE=4 SV=1                                                          | A0A024R3J7_HUMAN (+1)  | 80 kDa  | 0.2     | []                    | 1  | 2  | 2  | 3  | 3  | 6  |
| HECT, UBA and WWE domain containing 1, isoform CRA_c OS=Homo sapiens GN=HUWE1 PE=4 SV=1                                     | A0A024R9U8_HUMAN (+3)  | 481 kDa | 0.048   | BRAC1 high, Naive low | 0  | 0  | 0  | 4  | 3  | 12 |
| HLA-B associated transcript 3, isoform CRA_a OS=Homo sapiens GN=BAT3 PE=1 SV=1                                              | A0A024RCR6_HUMAN (+3)  | 119 kDa | 0.03    | BRAC1 high, Naive low | 0  | 0  | 0  | 1  | 1  | 3  |
| HSPA9 protein (Fragment) OS=Homo sapiens GN=HSPA9 PE=2 SV=1                                                                 | Q8N1C8_HUMAN           | 74 kDa  | 0.26    | []                    | 16 | 15 | 15 | 19 | 22 | 20 |
| Heat shock 60kDa protein 1 (Chaperonin), isoform CRA_a OS=Homo sapiens GN=HSPD1 PE=3 SV=1                                   | A0A024R3X4_HUMAN (+1)  | 61 kDa  | 0.15    | []                    | 15 | 22 | 14 | 32 | 50 | 53 |
| Heat shock 70 kDa protein 4 OS=Homo sapiens GN=HSPA4 PE=1 SV=1                                                              | A0A087WYC1_HUMAN (+4)  | 79 kDa  | 0.15    | []                    | 0  | 0  | 3  | 3  | 3  | 6  |
| Heat shock 70 kDa protein 14 OS=Homo sapiens GN=HSPA14 PE=1 SV=1                                                            | HSP7E_HUMAN            | 55 kDa  | 0.37    | []                    | 0  | 0  | 0  | 0  | 0  | 2  |
| Heat shock 105kDa/110kDa protein 1, isoform CRA_a OS=Homo sapiens GN=HSPH1 PE=3 SV=1                                        | A0A024RDQ0_HUMAN (+2)  | 92 kDa  | 0.015   | BRAC1 high, Naive low | 0  | 0  | 2  | 9  | 11 | 24 |
| Heat shock 70kDa protein 2, isoform CRA_a OS=Homo sapiens GN=HSPA2 PE=3 SV=1                                                | A0A024R6B5_HUMAN (+1)  | 70 kDa  | 0.12    | []                    | 16 | 13 | 18 | 20 | 15 | 18 |
| Heat shock cognate 71 kDa protein OS=Homo sapiens GN=HSPA8 PE=1 SV=1                                                        | HSP7C_HUMAN (+1)       | 71 kDa  | 0.43    | []                    | 24 | 20 | 27 | 44 | 42 | 49 |
| Heat shock protein HSP 90-alpha OS=Homo sapiens GN=HSP90AA1 PE=1 SV=5                                                       | HS90A_HUMAN (+1)       | 85 kDa  | 0.42    | []                    | 9  | 4  | 19 | 18 | 15 | 48 |
| Heat shock protein beta-1 OS=Homo sapiens GN=HSPB1 PE=1 SV=2                                                                | HSPB1_HUMAN (+1)       | 23 kDa  | 0.41    | []                    | 4  | 3  | 11 | 2  | 1  | 15 |
| Helicase SKI2W OS=Homo sapiens GN=SKI2L PE=1 SV=3                                                                           | SKI2V2_HUMAN (+7)      | 138 kDa | 0.37    | []                    | 0  | 0  | 0  | 0  | 0  | 5  |
| Hemoglobin subunit alpha OS=Homo sapiens GN=HBA1 PE=1 SV=2                                                                  | HBA_HUMAN (+4)         | 15 kDa  | 0.092   | []                    | 1  | 2  | 6  | 0  | 0  | 2  |
| Heparan sulfate 2-O-sulfotransferase 1 OS=Homo sapiens GN=HS2T1 PE=1 SV=1                                                   | HS2ST_HUMAN (+1)       | 42 kDa  | 0.37    | []                    | 0  | 0  | 0  | 0  | 0  | 2  |
| Heparan sulfate proteoglycan 2 (Perlecan), isoform CRA_b OS=Homo sapiens GN=HSPG2 PE=4 SV=1                                 | A0A024RAB6_HUMAN (+1)  | 464 kDa | 0.25    | []                    | 9  | 6  | 0  | 2  | 4  | 0  |
| Hephaestin OS=Homo sapiens GN=HEPH PE=1 SV=1                                                                                | A0A0C4DG76_HUMAN (+3)  | 131 kDa | 0.16    | []                    | 0  | 0  | 0  | 1  | 2  | 0  |
| Heterogeneous nuclear ribonucleoprotein A1, isoform CRA_b OS=Homo sapiens GN=HNRPA1 PE=4 SV=1                               | A0A024RAZ7_HUMAN (+4)  | 39 kDa  | 0.68    | []                    | 1  | 1  | 13 | 1  | 1  | 13 |
| Heterogeneous nuclear ribonucleoprotein A2/B1, isoform CRA_c OS=Homo sapiens GN=HNRPA2B1 PE=4 SV=1                          | A0A024RA61_HUMAN (+1)  | 37 kDa  | 0.81    | []                    | 0  | 1  | 16 | 1  | 2  | 16 |
| Heterogeneous nuclear ribonucleoprotein A3 OS=Homo sapiens GN=HNRPA3 PE=1 SV=2                                              | ROA3_HUMAN (+2)        | 40 kDa  | 0.53    | []                    | 1  | 1  | 4  | 0  | 0  | 6  |
| Heterogeneous nuclear ribonucleoprotein A/B OS=Homo sapiens GN=HNRNPAB PE=1 SV=1                                            | A0A087WZV1_HUMAN (+5)  | 37 kDa  | 0.25    | []                    | 1  | 1  | 3  | 1  | 2  | 2  |
| Heterogeneous nuclear ribonucleoprotein D (AU-rich element RNA binding protein 1, 37kDa), isoform CRA_d OS=Homo sapiens GN= | A0A024RDF3_HUMAN (+2)  | 38 kDa  | 0.69    | []                    | 0  | 1  | 5  | 1  | 0  | 5  |
| Heterogeneous nuclear ribonucleoprotein D-like OS=Homo sapiens GN=HNRNPD PE=1 SV=3                                          | HNRDL_HUMAN (+3)       | 46 kDa  | 0.37    | []                    | 0  | 0  | 3  | 0  | 0  | 0  |
| Heterogeneous nuclear ribonucleoprotein F, isoform CRA_a OS=Homo sapiens GN=HNRPF PE=4 SV=1                                 | A0A024R7T3_HUMAN (+1)  | 46 kDa  | 0.28    | []                    | 0  | 1  | 1  | 1  | 2  | 9  |
| Heterogeneous nuclear ribonucleoprotein H3 OS=Homo sapiens GN=HNRNPH3 PE=1 SV=2                                             | HNRH3_HUMAN (+4)       | 37 kDa  | 0.87    | []                    | 0  | 0  | 1  | 0  | 0  | 2  |
| Heterogeneous nuclear ribonucleoprotein H OS=Homo sapiens GN=HNRNPH1 PE=1 SV=1                                              | E9PCY7_HUMAN (+2)      | 47 kDa  | 0.9     | []                    | 0  | 2  | 5  | 2  | 2  | 8  |
| Heterogeneous nuclear ribonucleoprotein K, isoform CRA_d OS=Homo sapiens GN=HNRPK PE=4 SV=1                                 | A0A024R2Z8_HUMAN (+2)  | 51 kDa  | 0.97    | []                    | 3  | 2  | 10 | 6  | 4  | 14 |
| Heterogeneous nuclear ribonucleoprotein L OS=Homo sapiens GN=HNRNPL PE=1 SV=2                                               | HNRPL_HUMAN (+2)       | 64 kDa  | 0.76    | []                    | 0  | 1  | 2  | 0  | 0  | 8  |
| Heterogeneous nuclear ribonucleoprotein Q OS=Homo sapiens GN=SYNCRIP PE=1 SV=2                                              | HNRPQ_HUMAN (+1)       | 70 kDa  | 0.91    | []                    | 1  | 2  | 6  | 1  | 2  | 11 |
| cDNA, FLJ93632, highly similar to Homo sapiens heterogeneous nuclear ribonucleoprotein R (HNRPR), mRNA OS=Homo sapiens PE=2 | B2R7W4_HUMAN (+3)      | 71 kDa  | 0.96    | []                    | 0  | 0  | 2  | 1  | 0  | 2  |
| Heterogeneous nuclear ribonucleoproteins C1/C2 OS=Homo sapiens GN=HNRNPC PE=1 SV=4                                          | HNRPC_HUMAN (+7)       | 34 kDa  | 0.37    | []                    | 0  | 0  | 4  | 0  | 0  | 0  |
| Hexokinase OS=Homo sapiens PE=2 SV=1                                                                                        | A8K7J7_HUMAN (+3)      | 102 kDa | 0.036   | BRAC1 low, Naive high | 5  | 9  | 6  | 2  | 4  | 6  |
| Putative hexokinase HKDC1 OS=Homo sapiens GN=HKDC1 PE=1 SV=3                                                                | HKDC1_HUMAN (+3)       | 103 kDa | 1       | []                    | 0  | 0  | 0  | 0  | 0  | 0  |
| High-mobility group box 1, isoform CRA_a OS=Homo sapiens GN=HMGB1 PE=4 SV=1                                                 | A0A024RDR0_HUMAN (+1)  | 25 kDa  | 0.35    | []                    | 0  | 0  | 2  | 1  | 3  | 2  |
| Histidine--tRNA ligase, cytoplasmic OS=Homo sapiens GN=HARS PE=1 SV=1                                                       | B3KWE1_HUMAN (+3)      | 50 kDa  | 0.44    | []                    | 0  | 0  | 1  | 2  | 1  | 0  |
| Histone H1.0 OS=Homo sapiens GN=H1F0 PE=1 SV=3                                                                              | H10_HUMAN              | 21 kDa  | 0.056   | []                    | 1  | 1  | 2  | 0  | 0  | 2  |
| Histone H1.2 OS=Homo sapiens GN=HIST1H1C PE=1 SV=2                                                                          | H12_HUMAN              | 21 kDa  | 0.63    | []                    | 1  | 1  | 3  | 0  | 0  | 6  |
| Histone H1.4 OS=Homo sapiens GN=HIST1H1E PE=1 SV=2                                                                          | H14_HUMAN (+4)         | 22 kDa  | 0.47    | []                    | 1  | 1  | 3  | 0  | 0  | 5  |
| Histone H1.5 OS=Homo sapiens GN=HIST1H1B PE=1 SV=3                                                                          | H15_HUMAN              | 23 kDa  | 0.69    | []                    | 0  | 0  | 1  | 0  | 0  | 3  |
| Histone H2A type 2-A OS=Homo sapiens GN=HIST2H2AA3 PE=1 SV=3                                                                | H2A2A_HUMAN (+1)       | 14 kDa  | 0.16    | []                    | 1  | 2  | 1  | 1  | 0  | 2  |
| Histone H2A type 2-B OS=Homo sapiens GN=HIST2H2AB PE=1 SV=3                                                                 | H2A2B_HUMAN (+1)       | 14 kDa  | 0.92    | []                    | 0  | 0  | 3  | 0  | 0  | 4  |
| Histone H2B OS=Homo sapiens GN=HIST1H2BD PE=3 SV=1                                                                          | A0A024QZ77_HUMAN (+16) | 14 kDa  | 0.6     | []                    | 1  | 1  | 3  | 2  | 2  | 7  |
| Histone H2B OS=Homo sapiens GN=HIST1H2BJ PE=3 SV=1                                                                          | A0A024RCJ2_HUMAN (+5)  | 14 kDa  | 0.89    | []                    | 1  | 1  | 3  | 1  | 1  | 6  |
| Histone H3 OS=Homo sapiens PE=1 SV=1                                                                                        | A8K4Y7_HUMAN (+4)      | 15 kDa  | 0.15    | []                    | 0  | 0  | 1  | 1  | 1  | 2  |
| Histone H3.2 OS=Homo sapiens GN=HIST2H3A PE=1 SV=3                                                                          | H32_HUMAN              | 15 kDa  | 0.00029 | BRAC1 high, Naive low | 0  | 0  | 0  | 1  | 1  | 1  |
| Histone H4 OS=Homo sapiens GN=HIST1H4L PE=2 SV=1                                                                            | B2R4R0_HUMAN (+2)      | 11 kDa  | 0.7     | []                    | 5  | 3  | 3  | 6  | 6  | 5  |
| Histone deacetylase 6 OS=Homo sapiens GN=HDAC6 PE=1 SV=2                                                                    | HDAC6_HUMAN (+8)       | 131 kDa | 0.37    | []                    | 0  | 0  | 0  | 0  | 0  | 3  |
| Hormone-sensitive lipase OS=Homo sapiens GN=LIPE PE=1 SV=4                                                                  | LIPS_HUMAN (+1)        | 117 kDa | 0.37    | []                    | 0  | 0  | 0  | 0  | 0  | 9  |
| Huntingtin interacting protein 1 related, isoform CRA_a OS=Homo sapiens GN=HIP1R PE=4 SV=1                                  | A0A024RBR4_HUMAN (+1)  | 99 kDa  | 0.031   | BRAC1 high, Naive low | 0  | 0  | 0  | 2  | 1  | 1  |
| Hydroxyacyl-coenzyme A dehydrogenase, mitochondrial OS=Homo sapiens GN=HADH PE=1 SV=1                                       | A0A0A0MSE2_HUMAN (+2)  | 42 kDa  | 0.91    | []                    | 2  | 0  | 0  | 1  | 2  | 2  |
| Hydroxymethylglutaryl-CoA synthase, cytoplasmic OS=Homo sapiens GN=HMGC1 PE=1 SV=2                                          | HMCS1_HUMAN (+3)       | 57 kDa  | 0.37    | []                    | 0  | 0  | 0  | 0  | 0  | 5  |
| Hydroxysteroid (17-beta) dehydrogenase 12, isoform CRA_a OS=Homo sapiens GN=HSD17B12 PE=3 SV=1                              | D3DR22_HUMAN (+1)      | 39 kDa  | 0.53    | []                    | 1  | 1  | 6  | 3  | 4  | 12 |
| Hydroxysteroid dehydrogenase-like protein 2 OS=Homo sapiens GN=HSDL2 PE=1 SV=1                                              | HSDL2_HUMAN            | 45 kDa  | 0.87    | []                    | 1  | 1  | 3  | 1  | 1  | 8  |
| Hypoxia up-regulated protein 1 OS=Homo sapiens GN=HYOU1 PE=1 SV=1                                                           | HYOU1_HUMAN            | 111 kDa | 0.075   | []                    | 2  | 2  | 9  | 12 | 20 | 43 |
| IQ motif containing GTPase activating protein 2, isoform CRA_b OS=Homo sapiens GN=IQGAP2 PE=4 SV=1                          | A0A024RAJ8_HUMAN       | 181 kDa | 0.025   | BRAC1 high, Naive low | 0  | 0  | 0  | 52 | 54 | 23 |
| cDNA FLJ52376, highly similar to Ras GTPase-activating-like protein IQGAP2 OS=Homo sapiens PE=2 SV=1                        | B7Z881_HUMAN           | 99 kDa  | 0.034   | BRAC1 high, Naive low | 0  | 0  | 0  | 28 | 22 | 10 |
| IQ motif containing GTPase activating protein 3 OS=Homo sapiens GN=IQGAP3 PE=1 SV=1                                         | A2RR9C_HUMAN (+2)      | 185 kDa | 0.031   | BRAC1 high, Naive low | 0  | 0  | 0  | 4  | 2  | 2  |
| ITGAV protein OS=Homo sapiens GN=ITGAV PE=2 SV=1                                                                            | A5YM53_HUMAN (+2)      | 116 kDa | 0.68    | []                    | 5  | 10 | 15 | 17 | 16 | 16 |
| Immunoglobulin superfamily member 3 OS=Homo sapiens GN=IGSF3 PE=2 SV=3                                                      | IGSF3_HUMAN            | 135 kDa | 0.031   | BRAC1 high, Naive low | 0  | 0  | 0  | 4  | 2  | 2  |
| Immunoglobulin superfamily member 8 OS=Homo sapiens GN=IGSF8 PE=1 SV=1                                                      | IGSF8_HUMAN            | 65 kDa  | 0.58    | []                    | 1  | 0  | 0  | 3  | 1  | 0  |
| Importin subunit alpha-3 OS=Homo sapiens GN=KPNA4 PE=1 SV=1                                                                 | IMA3_HUMAN             | 58 kDa  | 0.27    | []                    | 0  | 0  | 2  | 2  | 2  | 2  |

|                                                                                                                      |                       |         |         |                       |    |    |    |    |    |    |
|----------------------------------------------------------------------------------------------------------------------|-----------------------|---------|---------|-----------------------|----|----|----|----|----|----|
| Importin-4 OS=Homo sapiens GN=IPO4 PE=1 SV=2                                                                         | IPO4_HUMAN (+1)       | 119 kDa | 0.26    | []                    | 0  | 0  | 0  | 0  | 2  | 13 |
| Importin-7 OS=Homo sapiens GN=IPO7 PE=1 SV=1                                                                         | IPO7_HUMAN            | 120 kDa | 0.31    | []                    | 0  | 0  | 3  | 1  | 3  | 11 |
| Importin-9 OS=Homo sapiens GN=IPO9 PE=1 SV=3                                                                         | IPO9_HUMAN            | 116 kDa | 0.018   | BRAC1 high, Naive low | 0  | 0  | 0  | 3  | 3  | 8  |
| Inactive tyrosine-protein kinase 7 OS=Homo sapiens GN=PTK7 PE=1 SV=2                                                 | PTK7_HUMAN            | 118 kDa | 0.44    | []                    | 6  | 11 | 13 | 16 | 15 | 1  |
| Inhibitor of nuclear factor kappa-B kinase-interacting protein OS=Homo sapiens GN=IKBIP PE=1 SV=1                    | IKIP_HUMAN            | 39 kDa  | 0.00091 | BRAC1 low, Naive high | 2  | 2  | 4  | 0  | 0  | 0  |
| Inorganic pyrophosphatase 2, mitochondrial OS=Homo sapiens GN=PPA2 PE=1 SV=2                                         | IPYR2_HUMAN (+3)      | 38 kDa  | 0.26    | []                    | 0  | 0  | 1  | 0  | 2  | 4  |
| Inorganic pyrophosphatase OS=Homo sapiens GN=PPA1 PE=1 SV=2                                                          | IPYR_HUMAN (+1)       | 33 kDa  | 0.14    | []                    | 0  | 0  | 0  | 1  | 2  | 9  |
| Inosine-5'-monophosphate dehydrogenase 2 (Fragment) OS=Homo sapiens GN=IMPDH2 PE=1 SV=1                              | H0Y4R1_HUMAN (+1)     | 51 kDa  | 0.38    | []                    | 1  | 0  | 2  | 2  | 1  | 18 |
| Inositol 1,4,5-trisphosphate receptor type 3 OS=Homo sapiens GN=ITPR3 PE=1 SV=2                                      | ITPR3_HUMAN (+1)      | 304 kDa | 0.17    | []                    | 0  | 0  | 0  | 0  | 2  | 6  |
| Inositol monophosphatase 3 OS=Homo sapiens GN=IMPAD1 PE=1 SV=1                                                       | IMPA3_HUMAN (+1)      | 39 kDa  | 0.86    | []                    | 0  | 1  | 1  | 0  | 0  | 3  |
| Insulin receptor substrate 2 OS=Homo sapiens GN=IRS2 PE=1 SV=2                                                       | IRS2_HUMAN (+2)       | 137 kDa | 0.016   | BRAC1 high, Naive low | 0  | 0  | 0  | 3  | 4  | 2  |
| Insulin-like growth factor 2 mRNA-binding protein 2 OS=Homo sapiens GN=IGF2BP2 PE=1 SV=2                             | IF2B2_HUMAN (+1)      | 66 kDa  | 0.25    | []                    | 2  | 4  | 4  | 0  | 1  | 8  |
| Insulin-like growth factor 2 mRNA-binding protein 3 OS=Homo sapiens GN=IGF2BP3 PE=1 SV=2                             | IF2B3_HUMAN           | 64 kDa  | 0.21    | []                    | 0  | 0  | 1  | 1  | 2  | 10 |
| Insulin-like growth factor-binding protein 5 OS=Homo sapiens GN=IGFBP5 PE=1 SV=1                                     | IBP5_HUMAN (+1)       | 31 kDa  | 0.37    | []                    | 0  | 0  | 2  | 0  | 0  | 0  |
| Integrin alpha-2 OS=Homo sapiens GN=ITGA2 PE=1 SV=1                                                                  | ITA2_HUMAN            | 129 kDa | 0.2     | []                    | 10 | 12 | 14 | 41 | 34 | 20 |
| Integrin alpha-2 OS=Homo sapiens GN=ITGA2 PE=1 SV=1                                                                  | E7ESP4_HUMAN          | 103 kDa | 0.18    | []                    | 8  | 12 | 13 | 40 | 33 | 19 |
| Integrin alpha-5 OS=Homo sapiens GN=ITGA5 PE=1 SV=2                                                                  | ITA5_HUMAN (+1)       | 115 kDa | 0.00086 | BRAC1 low, Naive high | 7  | 7  | 8  | 0  | 0  | 0  |
| Integrin alpha-6 OS=Homo sapiens GN=ITGA6 PE=1 SV=5                                                                  | ITA6_HUMAN            | 127 kDa | 0.0036  | BRAC1 high, Naive low | 0  | 0  | 0  | 41 | 36 | 30 |
| Integrin alpha-11 OS=Homo sapiens GN=ITGA11 PE=1 SV=2                                                                | ITA11_HUMAN           | 133 kDa | 0.37    | []                    | 0  | 0  | 5  | 0  | 0  | 0  |
| Integrin beta OS=Homo sapiens GN=ITGB4 PE=3 SV=1                                                                     | A0A024R8K7_HUMAN (+2) | 195 kDa | 0.0049  | BRAC1 high, Naive low | 0  | 0  | 0  | 59 | 54 | 41 |
| Integrin beta OS=Homo sapiens PE=2 SV=1                                                                              | A8K2N5_HUMAN (+3)     | 86 kDa  | 0.013   | BRAC1 high, Naive low | 0  | 0  | 0  | 2  | 3  | 6  |
| Integrin beta-1 OS=Homo sapiens GN=ITGB1 PE=1 SV=2                                                                   | ITB1_HUMAN            | 88 kDa  | 0.77    | []                    | 14 | 18 | 21 | 38 | 39 | 17 |
| Integrin beta-5 OS=Homo sapiens GN=ITGB5 PE=1 SV=1                                                                   | ITB5_HUMAN (+1)       | 88 kDa  | 0.061   | []                    | 1  | 1  | 2  | 3  | 5  | 9  |
| Intercellular adhesion molecule 1 OS=Homo sapiens GN=ICAM1 PE=1 SV=2                                                 | ICAM1_HUMAN (+1)      | 58 kDa  | 0.003   | BRAC1 low, Naive high | 7  | 11 | 10 | 3  | 4  | 2  |
| Interferon-induced GTP-binding protein Mx1 OS=Homo sapiens GN=MX1 PE=1 SV=4                                          | MX1_HUMAN             | 76 kDa  | 0.0051  | BRAC1 low, Naive high | 8  | 11 | 21 | 3  | 4  | 6  |
| Interferon-induced GTP-binding protein Mx2 OS=Homo sapiens GN=MX2 PE=1 SV=1                                          | MX2_HUMAN             | 82 kDa  | 0.00012 | BRAC1 low, Naive high | 6  | 7  | 11 | 2  | 2  | 4  |
| Interferon-induced protein with tetratricopeptide repeats 1 OS=Homo sapiens GN=IFIT1 PE=1 SV=2                       | IFIT1_HUMAN           | 55 kDa  | 0.48    | []                    | 0  | 2  | 11 | 2  | 1  | 5  |
| Interferon-induced protein with tetratricopeptide repeats 2 OS=Homo sapiens GN=IFIT2 PE=1 SV=1                       | IFIT2_HUMAN (+2)      | 55 kDa  | 0.37    | []                    | 0  | 0  | 2  | 0  | 0  | 0  |
| Interferon-induced protein with tetratricopeptide repeats 3 OS=Homo sapiens GN=IFIT3 PE=1 SV=1                       | IFIT3_HUMAN (+1)      | 56 kDa  | 0.44    | []                    | 1  | 0  | 3  | 0  | 0  | 3  |
| Interferon-induced protein with tetratricopeptide repeats 5 OS=Homo sapiens GN=IFIT5 PE=1 SV=1                       | IFIT5_HUMAN           | 56 kDa  | 0.37    | []                    | 0  | 0  | 0  | 0  | 0  | 3  |
| Interleukin enhancer-binding factor 2 OS=Homo sapiens GN=ILF2 PE=1 SV=2                                              | ILF2_HUMAN (+2)       | 43 kDa  | 0.66    | []                    | 0  | 0  | 4  | 0  | 0  | 3  |
| Interleukin enhancer-binding factor 3 OS=Homo sapiens GN=ILF3 PE=1 SV=3                                              | ILF3_HUMAN (+5)       | 95 kDa  | 0.52    | []                    | 0  | 0  | 3  | 0  | 1  | 0  |
| Inverted formin-2 OS=Homo sapiens GN=INF2 PE=1 SV=2                                                                  | INF2_HUMAN            | 136 kDa | 0.11    | []                    | 1  | 2  | 4  | 4  | 8  | 13 |
| Isocitrate dehydrogenase [NADP] cytoplasmic OS=Homo sapiens GN=IDH1 PE=1 SV=2                                        | IDHC_HUMAN (+3)       | 47 kDa  | 0.00054 | BRAC1 high, Naive low | 0  | 0  | 1  | 7  | 6  | 10 |
| Isocitrate dehydrogenase [NADP], mitochondrial OS=Homo sapiens GN=IDH2 PE=1 SV=2                                     | IDHP_HUMAN (+1)       | 51 kDa  | 0.04    | BRAC1 low, Naive high | 10 | 9  | 7  | 1  | 6  | 4  |
| Isocitrate dehydrogenase [NAD] subunit, mitochondrial OS=Homo sapiens PE=2 SV=1                                      | B4DJB4_HUMAN (+6)     | 35 kDa  | 0.31    | []                    | 1  | 1  | 2  | 1  | 1  | 3  |
| Isoleucyl-tRNA synthetase, cytoplasmic variant (Fragment) OS=Homo sapiens PE=2 SV=1                                  | Q59G75_HUMAN (+1)     | 146 kDa | 0.36    | []                    | 0  | 0  | 2  | 1  | 1  | 20 |
| Junction plakoglobin, isoform CRA_a OS=Homo sapiens GN=JUP PE=4 SV=1                                                 | A0A024R1X8_HUMAN (+1) | 82 kDa  | 0.019   | BRAC1 high, Naive low | 0  | 1  | 2  | 75 | 69 | 37 |
| Junction adhesion molecule OS=Homo sapiens PE=2 SV=1                                                                 | Q9Y5B2_HUMAN          | 28 kDa  | 0.0046  | BRAC1 high, Naive low | 0  | 0  | 0  | 10 | 9  | 7  |
| Junctional adhesion molecule A OS=Homo sapiens GN=F11R PE=1 SV=1                                                     | A0A087WY82_HUMAN (+4) | 30 kDa  | 0.0015  | BRAC1 high, Naive low | 0  | 0  | 0  | 12 | 11 | 10 |
| KIAA0528, isoform CRA_b OS=Homo sapiens GN=KIAA0528 PE=4 SV=1                                                        | A0A024RB03_HUMAN (+3) | 121 kDa | 0.028   | BRAC1 high, Naive low | 0  | 0  | 0  | 1  | 2  | 1  |
| KIF1-binding protein OS=Homo sapiens GN=KIF1BP PE=1 SV=1                                                             | KBP_HUMAN             | 72 kDa  | 0.37    | []                    | 0  | 0  | 0  | 0  | 0  | 2  |
| KN motif and ankyrin repeat domain-containing protein 2 OS=Homo sapiens GN=KANK2 PE=1 SV=1                           | KANK2_HUMAN           | 91 kDa  | 0.01    | BRAC1 low, Naive high | 2  | 3  | 2  | 0  | 0  | 1  |
| Kallikrein 6 (Neurosin, zyme), isoform CRA_b OS=Homo sapiens GN=KLK6 PE=3 SV=1                                       | A0A024R4J8_HUMAN (+1) | 27 kDa  | 0.0027  | BRAC1 high, Naive low | 0  | 0  | 0  | 1  | 1  | 2  |
| Keratin 18, isoform CRA_a OS=Homo sapiens GN=KRT18 PE=3 SV=1                                                         | A0A024RAY2_HUMAN (+2) | 48 kDa  | 0.0015  | BRAC1 high, Naive low | 4  | 3  | 7  | 42 | 44 | 39 |
| Keratin, type I cytoskeletal 9 OS=Homo sapiens GN=KRT9 PE=1 SV=3                                                     | K1C9_HUMAN            | 62 kDa  | 0.088   | []                    | 8  | 4  | 18 | 4  | 7  | 2  |
| Keratin, type I cytoskeletal 10 OS=Homo sapiens GN=KRT10 PE=1 SV=6                                                   | K1C10_HUMAN (+1)      | 69 kDa  | 0.22    | []                    | 10 | 8  | 15 | 2  | 20 | 2  |
| Keratin 14 (Epidermolysis bullosa simplex, Dowling-Meara, Koebner), isoform CRA_a OS=Homo sapiens GN=KRT14 PE=3 SV=1 | A0A024R1X6_HUMAN      | 30 kDa  | 0.7     | []                    | 1  | 1  | 0  | 1  | 3  | 1  |
| Keratin, type I cytoskeletal 14 OS=Homo sapiens GN=KRT14 PE=1 SV=4                                                   | K1C14_HUMAN           | 52 kDa  | 0.066   | []                    | 3  | 2  | 2  | 0  | 2  | 0  |
| Keratin, type I cytoskeletal 16 OS=Homo sapiens GN=KRT16 PE=1 SV=4                                                   | K1C16_HUMAN           | 51 kDa  | 0.37    | []                    | 0  | 0  | 2  | 0  | 0  | 0  |
| Keratin, type I cytoskeletal 17 OS=Homo sapiens GN=KRT17 PE=1 SV=2                                                   | K1C17_HUMAN           | 48 kDa  | 0.37    | []                    | 0  | 0  | 0  | 0  | 2  | 0  |
| Keratin, type I cytoskeletal 19 OS=Homo sapiens GN=KRT19 PE=1 SV=4                                                   | K1C19_HUMAN           | 44 kDa  | 0.12    | []                    | 2  | 4  | 7  | 13 | 15 | 9  |
| Keratin, type I cytoskeletal 20 OS=Homo sapiens GN=KRT20 PE=1 SV=1                                                   | K1C20_HUMAN           | 48 kDa  | 0.04    | BRAC1 high, Naive low | 0  | 0  | 1  | 3  | 4  | 2  |
| Keratin, type II cytoskeletal 7 OS=Homo sapiens GN=KRT7 PE=1 SV=5                                                    | K2C7_HUMAN            | 51 kDa  | 0.0063  | BRAC1 low, Naive high | 5  | 6  | 14 | 0  | 0  | 0  |
| Keratin, type II cytoskeletal 72 OS=Homo sapiens GN=KRT72 PE=1 SV=2                                                  | K2C72_HUMAN           | 56 kDa  | 0.71    | []                    | 0  | 0  | 3  | 0  | 2  | 0  |
| cDNA FLJ46620 fis, clone TLUNG200654, highly similar to Keratin, type II cytoskeletal 7 OS=Homo sapiens PE=2 SV=1    | B3KY79_HUMAN          | 49 kDa  | 0.04    | BRAC1 low, Naive high | 3  | 4  | 13 | 0  | 0  | 0  |
| Keratin 1 OS=Homo sapiens GN=KRT1 PE=3 SV=1                                                                          | H6VRF8_HUMAN (+4)     | 66 kDa  | 0.24    | []                    | 26 | 9  | 27 | 11 | 25 | 20 |
| Keratin, type II cytoskeletal 2 epidermal OS=Homo sapiens GN=KRT2 PE=1 SV=2                                          | K22E_HUMAN (+1)       | 65 kDa  | 0.44    | []                    | 4  | 2  | 12 | 4  | 10 | 1  |
| Keratin, type II cytoskeletal 6B OS=Homo sapiens GN=KRT6B PE=1 SV=5                                                  | K2C6B_HUMAN           | 60 kDa  | 0.37    | []                    | 0  | 0  | 4  | 0  | 0  | 0  |
| Keratin, type II cytoskeletal 8 OS=Homo sapiens GN=KRT8 PE=1 SV=7                                                    | K2C8_HUMAN            | 54 kDa  | 0.0029  | BRAC1 high, Naive low | 1  | 3  | 5  | 49 | 35 | 41 |
| cDNA FLJ54081, highly similar to Keratin, type II cytoskeletal 5 OS=Homo sapiens PE=2 SV=1                           | B4E1T1_HUMAN (+1)     | 59 kDa  | 0.37    | []                    | 1  | 0  | 0  | 0  | 0  | 0  |
| Keratin, type II cytoskeletal 80 OS=Homo sapiens GN=KRT80 PE=1 SV=2                                                  | K2C80_HUMAN           | 51 kDa  | 0.37    | []                    | 0  | 0  | 0  | 0  | 0  | 12 |

|                                                                                                             |                       |         |         |                       |    |    |    |    |    |    |
|-------------------------------------------------------------------------------------------------------------|-----------------------|---------|---------|-----------------------|----|----|----|----|----|----|
| Kin of IRRE-like protein 1 OS=Homo sapiens GN=KIRREL PE=1 SV=2                                              | KIRR1_HUMAN           | 84 kDa  | 0.028   | BRAC1 low, Naive high | 2  | 2  | 1  | 0  | 0  | 0  |
| Kinectin 1 (Kinesin receptor), isoform CRA_a OS=Homo sapiens GN=KTN1 PE=4 SV=1                              | A0A024R663_HUMAN (+1) | 156 kDa | 0.24    | []                    | 5  | 9  | 3  | 6  | 5  | 5  |
| Kinesin light chain 4, isoform CRA_a OS=Homo sapiens GN=KLC4 PE=4 SV=1                                      | A0A024RCZ8_HUMAN (+1) | 69 kDa  | 0.0027  | BRAC1 high, Naive low | 0  | 0  | 0  | 1  | 1  | 2  |
| Kinesin-like protein KIF13B OS=Homo sapiens GN=KIF13B PE=1 SV=2                                             | K113B_HUMAN (+1)      | 203 kDa | 0.37    | []                    | 0  | 0  | 0  | 0  | 0  | 3  |
| Kinesin-like protein OS=Homo sapiens GN=KIF5B PE=3 SV=1                                                     | D3DRX6_HUMAN (+2)     | 110 kDa | 0.82    | []                    | 1  | 3  | 12 | 8  | 6  | 13 |
| Kinesin-like protein OS=Homo sapiens GN=KIF23 PE=1 SV=1                                                     | H7BYN4_HUMAN (+1)     | 109 kDa | 0.019   | BRAC1 high, Naive low | 0  | 0  | 1  | 11 | 14 | 7  |
| L-lactate dehydrogenase A chain OS=Homo sapiens GN=LDHA PE=1 SV=2                                           | LDHA_HUMAN (+1)       | 37 kDa  | 0.25    | []                    | 9  | 7  | 17 | 11 | 11 | 20 |
| L-lactate dehydrogenase B chain OS=Homo sapiens GN=LDHB PE=1 SV=2                                           | LDHB_HUMAN (+1)       | 37 kDa  | 0.14    | []                    | 3  | 2  | 7  | 8  | 10 | 11 |
| L-xylulose reductase OS=Homo sapiens GN=DCXR PE=1 SV=2                                                      | DCXR_HUMAN (+5)       | 26 kDa  | 0.028   | BRAC1 high, Naive low | 0  | 0  | 0  | 1  | 2  | 1  |
| LDLR chaperone MESD OS=Homo sapiens GN=MESDC2 PE=1 SV=2                                                     | MESD_HUMAN            | 26 kDa  | 0.54    | []                    | 0  | 0  | 2  | 0  | 1  | 6  |
| LIM and SH3 protein 1, isoform CRA_b OS=Homo sapiens GN=LASP1 PE=4 SV=1                                     | A0A024R1S8_HUMAN (+2) | 30 kDa  | 0.61    | []                    | 0  | 2  | 2  | 3  | 2  | 3  |
| LIM domain and actin-binding protein 1 OS=Homo sapiens GN=LIMA1 PE=1 SV=1                                   | LIMA1_HUMAN (+1)      | 85 kDa  | 0.004   | BRAC1 high, Naive low | 3  | 5  | 12 | 27 | 26 | 31 |
| LIM domain only 7 protein OS=Homo sapiens GN=LMO7 PE=2 SV=1                                                 | F8J2B5_HUMAN (+3)     | 186 kDa | 0.55    | []                    | 5  | 11 | 13 | 13 | 18 | 3  |
| LIM domain only protein 7 OS=Homo sapiens GN=LMO7 PE=1 SV=1                                                 | E9PMS6_HUMAN          | 145 kDa | 0.69    | []                    | 4  | 12 | 11 | 13 | 18 | 3  |
| Lactadherin OS=Homo sapiens GN=MFG8 PE=1 SV=2                                                               | MFGM_HUMAN (+1)       | 43 kDa  | 0.0071  | BRAC1 low, Naive high | 12 | 13 | 32 | 0  | 0  | 2  |
| tr X6R3G6 X6R3G6_HUMAN Lactadherin OS=Homo sapiens GN=MFG8 PE=1 SV=1                                        | X6R3G6_HUMAN          | ?       | 0.006   | BRAC1 low, Naive high | 11 | 13 | 30 | 0  | 0  | 2  |
| Ladlinin 1 OS=Homo sapiens GN=LAD1 PE=2 SV=1                                                                | Q6IPJ9_HUMAN          | 57 kDa  | 0.003   | BRAC1 high, Naive low | 0  | 0  | 0  | 6  | 4  | 5  |
| Lamin-B1 OS=Homo sapiens GN=LMNB1 PE=1 SV=2                                                                 | LMNB1_HUMAN           | 66 kDa  | 0.37    | []                    | 0  | 0  | 0  | 0  | 0  | 2  |
| Lamin-B2 OS=Homo sapiens GN=LMNB2 PE=1 SV=4                                                                 | LMNB2_HUMAN (+1)      | 70 kDa  | 0.29    | []                    | 0  | 1  | 6  | 0  | 0  | 1  |
| Laminin subunit alpha-4 OS=Homo sapiens GN=LAMA4 PE=1 SV=4                                                  | LAMA4_HUMAN (+5)      | 203 kDa | 0.37    | []                    | 0  | 3  | 0  | 0  | 0  | 0  |
| Laminin subunit beta-2 OS=Homo sapiens GN=LAMB2 PE=1 SV=2                                                   | LAMB2_HUMAN (+1)      | 196 kDa | 0.0023  | BRAC1 low, Naive high | 3  | 3  | 3  | 0  | 0  | 0  |
| Laminin subunit gamma-1 OS=Homo sapiens GN=LAMC1 PE=1 SV=3                                                  | LAMC1_HUMAN (+1)      | 178 kDa | 0.0023  | BRAC1 low, Naive high | 5  | 5  | 5  | 0  | 0  | 0  |
| Lanosterol 14-alpha demethylase OS=Homo sapiens GN=CYP51A1 PE=1 SV=3                                        | CP51A_HUMAN (+2)      | 57 kDa  | 0.59    | []                    | 0  | 0  | 2  | 0  | 1  | 5  |
| Lanosterol synthase OS=Homo sapiens GN=LSS PE=1 SV=1                                                        | ERG7_HUMAN            | 83 kDa  | 0.15    | []                    | 0  | 0  | 1  | 1  | 1  | 2  |
| Large neutral amino acids transporter 1 (Fragment) OS=Homo sapiens GN=SLC7A5 PE=4 SV=1                      | Q2MCL6_HUMAN          | 7 kDa   | 0.13    | []                    | 0  | 0  | 0  | 8  | 6  | 0  |
| Large neutral amino acids transporter small subunit 1 OS=Homo sapiens GN=SLC7A5 PE=1 SV=2                   | LAT1_HUMAN            | 55 kDa  | 0.22    | []                    | 4  | 4  | 5  | 13 | 9  | 9  |
| Lck-interacting transmembrane adapter 1 OS=Homo sapiens GN=LIME1 PE=1 SV=1                                  | LIME1_HUMAN           | 31 kDa  | 0.0027  | BRAC1 high, Naive low | 0  | 0  | 0  | 2  | 2  | 4  |
| Lectin, mannose-binding, 1, isoform CRA_b OS=Homo sapiens GN=LMAN1 PE=4 SV=1                                | A0A024R2A7_HUMAN (+2) | 58 kDa  | 0.88    | []                    | 1  | 2  | 4  | 1  | 2  | 8  |
| Leucine rich repeat containing 47, isoform CRA_a OS=Homo sapiens GN=LRRC47 PE=4 SV=1                        | A0A024R4G1_HUMAN (+1) | 63 kDa  | 0.67    | []                    | 1  | 1  | 0  | 2  | 1  | 2  |
| Leucine zipper-EF-hand containing transmembrane protein 1, isoform CRA_a OS=Homo sapiens GN=LETM1 PE=4 SV=1 | D3DVQ1_HUMAN (+1)     | 64 kDa  | 0.15    | []                    | 0  | 1  | 1  | 2  | 2  | 2  |
| Leucine-rich PPR-motif containing OS=Homo sapiens GN=LRPPRC PE=4 SV=1                                       | E5KNY5_HUMAN (+1)     | 158 kDa | 0.081   | []                    | 2  | 1  | 8  | 8  | 19 | 21 |
| Leucine-rich repeat and calponin homology domain-containing protein 1 OS=Homo sapiens GN=LRCH1 PE=1 SV=3    | LRCH1_HUMAN (+1)      | 81 kDa  | 0.37    | []                    | 0  | 0  | 0  | 0  | 3  | 0  |
| Leucine-rich repeat-containing protein 59 OS=Homo sapiens GN=LRRC59 PE=1 SV=1                               | LRC59_HUMAN           | 35 kDa  | 0.077   | []                    | 5  | 9  | 6  | 3  | 7  | 6  |
| Lipid phosphate phosphohydrolase 1 OS=Homo sapiens GN=PPAP2A PE=1 SV=1                                      | LPP1_HUMAN (+1)       | 32 kDa  | 0.6     | []                    | 0  | 0  | 1  | 0  | 0  | 4  |
| Lipid phosphate phosphohydrolase 2 (Fragment) OS=Homo sapiens GN=PPAP2C PE=1 SV=1                           | A0A0J9YXA3_HUMAN (+3) | 24 kDa  | 0.12    | []                    | 0  | 0  | 0  | 2  | 0  | 2  |
| Lipolysis-stimulated lipoprotein receptor OS=Homo sapiens GN=LSR PE=1 SV=4                                  | LSR_HUMAN (+1)        | 71 kDa  | 0.0068  | BRAC1 high, Naive low | 0  | 0  | 0  | 14 | 12 | 9  |
| Lipopolysaccharide-responsive and beige-like anchor protein OS=Homo sapiens GN=LRBA PE=1 SV=1               | E9PEM5_HUMAN (+3)     | 287 kDa | 0.37    | []                    | 0  | 0  | 0  | 0  | 0  | 4  |
| Lish domain-containing protein ARMC9 OS=Homo sapiens GN=ARMC9 PE=1 SV=2                                     | ARMC9_HUMAN (+2)      | 92 kDa  | 0.87    | []                    | 0  | 0  | 1  | 0  | 0  | 2  |
| Lon protease homolog OS=Homo sapiens PE=2 SV=1                                                              | B3KU28_HUMAN (+6)     | 95 kDa  | 0.0089  | BRAC1 low, Naive high | 3  | 4  | 6  | 1  | 2  | 5  |
| Long-chain-fatty-acid--CoA ligase 1 OS=Homo sapiens GN=ACSL1 PE=1 SV=1                                      | ACSL1_HUMAN (+4)      | 78 kDa  | 0.37    | []                    | 0  | 0  | 0  | 0  | 0  | 2  |
| Long-chain-fatty-acid--CoA ligase 4 OS=Homo sapiens GN=ACSL4 PE=1 SV=2                                      | ACSL4_HUMAN (+1)      | 79 kDa  | 0.049   | BRAC1 high, Naive low | 3  | 2  | 4  | 7  | 11 | 18 |
| Long-chain-fatty-acid--CoA ligase 5 OS=Homo sapiens GN=ACSL5 PE=1 SV=1                                      | ACSL5_HUMAN           | 76 kDa  | 0.0027  | BRAC1 high, Naive low | 0  | 0  | 0  | 6  | 6  | 12 |
| Low-density lipoprotein receptor OS=Homo sapiens GN=LDLR PE=1 SV=1                                          | LDLR_HUMAN (+4)       | 95 kDa  | 0.37    | []                    | 0  | 0  | 0  | 0  | 0  | 3  |
| Lymphocyte antigen 75 OS=Homo sapiens GN=LY75 PE=1 SV=3                                                     | LY75_HUMAN            | 198 kDa | 0.093   | []                    | 0  | 0  | 0  | 10 | 16 | 2  |
| Lymphocyte antigen 75 variant (Fragment) OS=Homo sapiens PE=2 SV=1                                          | Q59H44_HUMAN          | 155 kDa | 0.12    | []                    | 0  | 0  | 0  | 10 | 12 | 0  |
| Lymphocyte function-associated antigen 3 OS=Homo sapiens GN=CD58 PE=1 SV=1                                  | LFA3_HUMAN (+5)       | 28 kDa  | 0.37    | []                    | 0  | 0  | 0  | 0  | 2  | 0  |
| Lysine--tRNA ligase OS=Homo sapiens GN=KARS PE=1 SV=3                                                       | SYK_HUMAN             | 68 kDa  | 0.17    | []                    | 0  | 0  | 0  | 1  | 1  | 7  |
| Lysophosphatidic acid receptor 1 OS=Homo sapiens GN=LPAR1 PE=1 SV=3                                         | LPAR1_HUMAN (+3)      | 41 kDa  | 0.00091 | BRAC1 low, Naive high | 1  | 1  | 2  | 0  | 0  | 0  |
| Lysophosphatidylcholine acyltransferase 1 OS=Homo sapiens GN=LPCAT1 PE=1 SV=2                               | PCAT1_HUMAN           | 59 kDa  | 0.38    | []                    | 0  | 0  | 1  | 0  | 1  | 5  |
| Lysophosphatidylcholine acyltransferase 2 OS=Homo sapiens GN=LPCAT2 PE=1 SV=1                               | PCAT2_HUMAN           | 60 kDa  | 0.11    | []                    | 0  | 0  | 0  | 1  | 1  | 5  |
| Lysophospholipid acyltransferase 7 OS=Homo sapiens GN=MBOAT7 PE=1 SV=2                                      | MBOAT7_HUMAN          | 53 kDa  | 0.15    | []                    | 0  | 2  | 3  | 4  | 4  | 9  |
| Lysophospholipid acyltransferase LPCAT4 OS=Homo sapiens GN=LPCAT4 PE=1 SV=1                                 | LPCT4_HUMAN (+1)      | 57 kDa  | 0.37    | []                    | 0  | 0  | 0  | 0  | 0  | 4  |
| Lysosomal Pro-X carboxypeptidase OS=Homo sapiens GN=PRCP PE=1 SV=1                                          | PCP_HUMAN (+2)        | 56 kDa  | 0.19    | []                    | 0  | 2  | 1  | 0  | 0  | 0  |
| Lysosomal-associated membrane protein 1, isoform CRA_a OS=Homo sapiens GN=LAMP1 PE=4 SV=1                   | A0A024RDY3_HUMAN (+2) | 45 kDa  | 0.1     | []                    | 8  | 6  | 3  | 2  | 1  | 4  |
| MARCKS-related protein OS=Homo sapiens GN=MARCKSL1 PE=1 SV=2                                                | MRP_HUMAN             | 20 kDa  | 0.063   | []                    | 1  | 0  | 0  | 10 | 10 | 3  |
| MHC class I antigen (Fragment) OS=Homo sapiens GN=HLA-A PE=3 SV=1                                           | E9LXZ0_HUMAN          | 21 kDa  | 0.24    | []                    | 14 | 12 | 10 | 16 | 14 | 8  |
| HLA class I antigen OS=Homo sapiens GN=HLA-C PE=3 SV=1                                                      | A0A090MEW7_HUMAN      | 41 kDa  | 0.079   | []                    | 12 | 11 | 13 | 12 | 12 | 0  |
| MHC class I antigen (Fragment) OS=Homo sapiens GN=HLA-A PE=3 SV=1                                           | X5MFD7_HUMAN          | 38 kDa  | 0.12    | []                    | 20 | 15 | 17 | 18 | 18 | 12 |
| MHC class I antigen (Fragment) OS=Homo sapiens GN=HLA-A PE=3 SV=1                                           | A6YT90_HUMAN          | 36 kDa  | 0.56    | []                    | 15 | 0  | 10 | 23 | 25 | 16 |
| MHC class I antigen (Fragment) OS=Homo sapiens GN=HLA-A PE=3 SV=1                                           | G1EN46_HUMAN          | 21 kDa  | 0.032   | BRAC1 high, Naive low | 0  | 0  | 0  | 18 | 19 | 7  |
| MHC class I antigen (Fragment) OS=Homo sapiens GN=HLA-A PE=3 SV=1                                           | D5H3V9_HUMAN (+1)     | 34 kDa  | 0.87    | []                    | 15 | 9  | 10 | 23 | 24 | 17 |
| MHC class I antigen (Fragment) OS=Homo sapiens GN=HLA-A PE=3 SV=1                                           | F6KRM6_HUMAN          | 21 kDa  | 0.024   | BRAC1 high, Naive low | 0  | 0  | 0  | 20 | 21 | 9  |

|                                                                                             |                       |        |           |                       |    |    |    |    |    |    |
|---------------------------------------------------------------------------------------------|-----------------------|--------|-----------|-----------------------|----|----|----|----|----|----|
| MHC class I antigen (Fragment) OS=Homo sapiens GN=HLA-A PE=3 SV=1                           | I7GY09_HUMAN          | 32 kDa | 0.12      | []                    | 14 | 13 | 0  | 0  | 0  | 0  |
| MHC class I antigen (Fragment) OS=Homo sapiens GN=HLA-A PE=3 SV=1                           | D6MLL3_HUMAN          | 21 kDa | 0.4       | []                    | 0  | 9  | 6  | 15 | 15 | 8  |
| MHC class I antigen (Fragment) OS=Homo sapiens GN=HLA-A PE=3 SV=1                           | F6IQY8_HUMAN          | 38 kDa | 0.28      | []                    | 24 | 15 | 12 | 18 | 19 | 14 |
| MHC class I antigen (Fragment) OS=Homo sapiens GN=HLA-A PE=3 SV=1                           | V5L1W2_HUMAN          | 32 kDa | 0.24      | []                    | 19 | 13 | 12 | 17 | 16 | 12 |
| HLA class I histocompatibility antigen, B-44 alpha chain OS=Homo sapiens GN=HLA-B PE=1 SV=1 | 1B44_HUMAN (+33)      | 40 kDa | 0.29      | []                    | 16 | 16 | 0  | 10 | 6  | 5  |
| MHC class I antigen (Fragment) OS=Homo sapiens GN=HLA-A PE=3 SV=1                           | A0A0H3W567_HUMAN      | 32 kDa | 0.22      | []                    | 13 | 11 | 10 | 13 | 15 | 9  |
| MHC class I antigen (Fragment) OS=Homo sapiens GN=HLA-A PE=3 SV=1                           | F2X133_HUMAN          | 31 kDa | 0.0046    | BRAC1 high, Naive low | 0  | 0  | 0  | 18 | 18 | 13 |
| MHC class I antigen (Fragment) OS=Homo sapiens GN=HLA-A PE=3 SV=1                           | U5YJN1_HUMAN          | 38 kDa | 0.011     | BRAC1 high, Naive low | 0  | 0  | 0  | 21 | 23 | 13 |
| MHC class I antigen (Fragment) OS=Homo sapiens GN=HLA-A PE=3 SV=1                           | H9C5F6_HUMAN          | 21 kDa | 0.81      | []                    | 14 | 7  | 0  | 13 | 15 | 6  |
| MHC class I antigen (Fragment) OS=Homo sapiens GN=HLA-A PE=3 SV=1                           | D6MJ95_HUMAN (+23)    | 21 kDa | 0.64      | []                    | 12 | 9  | 0  | 12 | 14 | 0  |
| MHC class I antigen (Fragment) OS=Homo sapiens GN=HLA-A PE=3 SV=1                           | D5G2L1_HUMAN (+2)     | 21 kDa | 0.018     | BRAC1 high, Naive low | 0  | 0  | 0  | 18 | 21 | 10 |
| MHC class I antigen (Fragment) OS=Homo sapiens GN=HLA-A PE=3 SV=1                           | J9PWW7_HUMAN          | 21 kDa | 0.37      | []                    | 0  | 0  | 0  | 0  | 8  | 0  |
| MHC class I antigen (Fragment) OS=Homo sapiens GN=HLA-A PE=3 SV=1                           | C9DSL3_HUMAN          | 21 kDa | 0.37      | []                    | 0  | 0  | 6  | 0  | 0  | 0  |
| MHC class I antigen (Fragment) OS=Homo sapiens GN=HLA-A PE=4 SV=2                           | A0A0F7W082_HUMAN      | 23 kDa | 0.091     | []                    | 0  | 0  | 9  | 16 | 15 | 11 |
| MHC class I antigen (Fragment) OS=Homo sapiens GN=HLA-B PE=3 SV=1                           | C7FDR3_HUMAN (+1)     | 21 kDa | 0.044     | BRAC1 low, Naive high | 9  | 10 | 9  | 8  | 8  | 4  |
| MHC class I antigen (Fragment) OS=Homo sapiens GN=HLA-B PE=3 SV=1                           | A0A0G3EHC5_HUMAN      | 32 kDa | 0.0034    | BRAC1 low, Naive high | 17 | 21 | 18 | 3  | 5  | 0  |
| HLA-A26 protein OS=Homo sapiens GN=HLA-A26 PE=3 SV=1                                        | I019633_HUMAN         | 24 kDa | 1         | []                    | 0  | 0  | 0  | 0  | 0  | 0  |
| MHC class I antigen (Fragment) OS=Homo sapiens GN=HLA-B PE=3 SV=1                           | W0G8G7_HUMAN          | 32 kDa | 0.32      | []                    | 0  | 19 | 19 | 0  | 12 | 10 |
| MHC class I antigen (Fragment) OS=Homo sapiens GN=HLA-B PE=3 SV=1                           | D9UAZ0_HUMAN          | 34 kDa | 0.026     | BRAC1 low, Naive high | 7  | 8  | 9  | 7  | 6  | 0  |
| MHC class I antigen (Fragment) OS=Homo sapiens GN=HLA-B PE=3 SV=1                           | M5JF4_HUMAN           | 21 kDa | 0.0084    | BRAC1 low, Naive high | 10 | 12 | 8  | 0  | 0  | 0  |
| MHC class I antigen (Fragment) OS=Homo sapiens GN=HLA-B PE=3 SV=1                           | G9HZ41_HUMAN          | 32 kDa | 0.0058    | BRAC1 low, Naive high | 23 | 25 | 22 | 7  | 6  | 5  |
| MHC class I antigen (Fragment) OS=Homo sapiens GN=HLA-B PE=3 SV=1                           | A0A0A7C605_HUMAN (+2) | 21 kDa | 0.28      | []                    | 0  | 0  | 0  | 5  | 0  | 1  |
| MHC class I antigen (Fragment) OS=Homo sapiens GN=HLA-B PE=3 SV=1                           | A0A0E3DDF4_HUMAN      | 21 kDa | 0.65      | []                    | 10 | 0  | 0  | 4  | 5  | 0  |
| MHC class I antigen (Fragment) OS=Homo sapiens GN=HLA-B PE=3 SV=1                           | L7PEW7_HUMAN          | 21 kDa | 0.0076    | BRAC1 low, Naive high | 19 | 23 | 16 | 2  | 0  | 0  |
| MHC class I antigen (Fragment) OS=Homo sapiens GN=HLA-B PE=3 SV=1                           | F5A500_HUMAN          | 32 kDa | 0.0025    | BRAC1 low, Naive high | 22 | 26 | 24 | 7  | 5  | 6  |
| MHC class I antigen (Fragment) OS=Homo sapiens GN=HLA-B PE=3 SV=1                           | D5FZT2_HUMAN          | 21 kDa | 0.013     | BRAC1 low, Naive high | 13 | 15 | 9  | 0  | 0  | 0  |
| HLA-C protein (Fragment) OS=Homo sapiens GN=HLA-C PE=2 SV=1                                 | Q29958_HUMAN          | 35 kDa | 0.0041    | BRAC1 low, Naive high | 11 | 14 | 12 | 0  | 0  | 6  |
| MHC class I antigen (Fragment) OS=Homo sapiens GN=HLA-B PE=3 SV=1                           | D9I8N4_HUMAN          | 34 kDa | < 0.00010 | BRAC1 low, Naive high | 11 | 13 | 17 | 0  | 0  | 0  |
| MHC class I antigen (Fragment) OS=Homo sapiens GN=HLA-B PE=3 SV=1                           | F4NBS9_HUMAN          | 38 kDa | 0.0012    | BRAC1 low, Naive high | 14 | 17 | 18 | 0  | 6  | 0  |
| MHC class I antigen (Fragment) OS=Homo sapiens GN=HLA-B PE=3 SV=1                           | F4NB7_HUMAN           | 38 kDa | 0.26      | []                    | 0  | 15 | 18 | 0  | 12 | 0  |
| MHC class I antigen (Fragment) OS=Homo sapiens GN=HLA-B PE=3 SV=1                           | A0A0G2R0X5_HUMAN      | 21 kDa | 0.62      | []                    | 10 | 0  | 0  | 5  | 4  | 0  |
| MHC class I antigen (Fragment) OS=Homo sapiens GN=HLA-B PE=3 SV=1                           | S4TZG0_HUMAN          | 21 kDa | 0.015     | BRAC1 low, Naive high | 18 | 20 | 12 | 0  | 0  | 0  |
| MHC class I antigen (Fragment) OS=Homo sapiens GN=HLA-B PE=3 SV=1                           | D3HIE9_HUMAN          | 34 kDa | 0.66      | []                    | 0  | 0  | 12 | 0  | 0  | 9  |
| MHC class I antigen (Fragment) OS=Homo sapiens GN=HLA-B PE=3 SV=1                           | F4YTD6_HUMAN          | 38 kDa | 0.12      | []                    | 0  | 0  | 0  | 0  | 6  | 6  |
| MHC class I antigen (Fragment) OS=Homo sapiens GN=HLA-B PE=3 SV=1                           | B2DG08_HUMAN          | 32 kDa | 0.37      | []                    | 0  | 0  | 0  | 13 | 0  | 0  |
| MHC class I antigen (Fragment) OS=Homo sapiens GN=HLA-B PE=3 SV=1                           | J7K012_HUMAN          | 21 kDa | 0.37      | []                    | 0  | 0  | 0  | 0  | 11 | 0  |
| MHC class I antigen (Fragment) OS=Homo sapiens GN=HLA-B PE=3 SV=1                           | A0A077GYB2_HUMAN      | 21 kDa | 0.37      | []                    | 0  | 0  | 0  | 11 | 0  | 0  |
| Leucocyte antigen A OS=Homo sapiens GN=HLA-A PE=2 SV=1                                      | Q95J05_HUMAN          | 41 kDa | 0.58      | []                    | 10 | 10 | 7  | 15 | 16 | 6  |
| MHC class I antigen (Fragment) OS=Homo sapiens GN=HLA-B PE=3 SV=1                           | C9WCW0_HUMAN          | 21 kDa | 0.37      | []                    | 0  | 7  | 0  | 0  | 0  | 0  |
| MHC class I antigen (Fragment) OS=Homo sapiens GN=HLA-B PE=4 SV=1                           | A0A0K0KR71_HUMAN (+1) | 21 kDa | 0.0074    | BRAC1 low, Naive high | 17 | 23 | 15 | 0  | 0  | 0  |
| MHC class I antigen (Fragment) OS=Homo sapiens GN=HLA-B PE=4 SV=1                           | A0A0K2GUN1_HUMAN      | 32 kDa | 0.056     | []                    | 17 | 15 | 17 | 16 | 12 | 0  |
| MHC class I antigen (Fragment) OS=Homo sapiens GN=HLA-C PE=3 SV=1                           | A2BCX7_HUMAN (+1)     | 21 kDa | 0.37      | []                    | 0  | 12 | 8  | 5  | 6  | 0  |
| MHC class I antigen (Fragment) OS=Homo sapiens GN=HLA-C PE=3 SV=1                           | K7RE26_HUMAN          | 21 kDa | 0.37      | []                    | 10 | 0  | 0  | 0  | 0  | 0  |
| MHC class I antigen (Fragment) OS=Homo sapiens GN=HLA-C PE=3 SV=1                           | A0A0B6VWV2_HUMAN (+1) | 41 kDa | 0.84      | []                    | 15 | 0  | 9  | 15 | 13 | 9  |
| MHC class I antigen (Fragment) OS=Homo sapiens GN=HLA-C PE=3 SV=1                           | F6IQL0_HUMAN (+1)     | 39 kDa | 0.0062    | BRAC1 low, Naive high | 11 | 15 | 13 | 0  | 7  | 0  |
| MHC class I antigen (Fragment) OS=Homo sapiens GN=HLA-C PE=3 SV=1                           | E2D5R5_HUMAN          | 21 kDa | 0.2       | []                    | 0  | 15 | 11 | 0  | 0  | 6  |
| MHC class I antigen (Fragment) OS=Homo sapiens GN=HLA-C PE=3 SV=1                           | V5JAP0_HUMAN          | 21 kDa | 0.015     | BRAC1 low, Naive high | 10 | 16 | 10 | 5  | 0  | 0  |
| MHC class I antigen (Fragment) OS=Homo sapiens GN=HLA-C PE=3 SV=1                           | F6IQJ6_HUMAN          | 39 kDa | 0.0078    | BRAC1 low, Naive high | 13 | 20 | 14 | 0  | 0  | 6  |
| Lymphocyte antigen OS=Homo sapiens GN=HLA-G PE=2 SV=1                                       | Q30182_HUMAN          | 38 kDa | 0.13      | []                    | 0  | 0  | 0  | 3  | 2  | 0  |
| MHC class I antigen (Fragment) OS=Homo sapiens GN=HLA-C PE=3 SV=1                           | E0WMMV4_HUMAN         | 32 kDa | 0.25      | []                    | 0  | 14 | 10 | 0  | 4  | 5  |
| MHC class I antigen (Fragment) OS=Homo sapiens GN=HLA-C PE=3 SV=1                           | F6IQI7_HUMAN (+1)     | 39 kDa | 0.006     | BRAC1 low, Naive high | 15 | 18 | 16 | 6  | 0  | 9  |
| MHC class I antigen (Fragment) OS=Homo sapiens GN=HLA-C PE=3 SV=1                           | A0A0D5CB98_HUMAN      | 21 kDa | 0.27      | []                    | 0  | 13 | 7  | 0  | 5  | 0  |
| MHC class I antigen (Fragment) OS=Homo sapiens GN=HLA-C PE=3 SV=1                           | C0KJY7_HUMAN (+1)     | 21 kDa | 0.0084    | BRAC1 low, Naive high | 11 | 16 | 10 | 0  | 0  | 0  |
| MHC class I antigen (Fragment) OS=Homo sapiens GN=HLA-C PE=3 SV=1                           | J7F7D0_HUMAN          | 21 kDa | 0.17      | []                    | 0  | 16 | 10 | 0  | 0  | 0  |
| MHC class I antigen (Fragment) OS=Homo sapiens GN=HLA-C PE=3 SV=1                           | A0A0A7C4Z3_HUMAN      | 21 kDa | 0.37      | []                    | 0  | 9  | 0  | 0  | 0  | 0  |
| MHC class I antigen (Fragment) OS=Homo sapiens GN=HLA-Cw PE=3 SV=1                          | A0A0E3DD33_HUMAN      | 21 kDa | 0.17      | []                    | 0  | 16 | 10 | 0  | 0  | 0  |
| MHC class I antigen (Fragment) OS=Homo sapiens GN=HLA-C PE=3 SV=1                           | D3JT89_HUMAN          | 21 kDa | 0.37      | []                    | 0  | 0  | 0  | 0  | 0  | 2  |
| MHC class I antigen (Fragment) OS=Homo sapiens GN=HLA-Cw PE=3 SV=1                          | E7CYP5_HUMAN          | 21 kDa | 0.76      | []                    | 0  | 15 | 0  | 14 | 13 | 7  |
| MHC class I antigen (Fragment) OS=Homo sapiens GN=HLA-Cw PE=3 SV=1                          | A5PHT5_HUMAN (+1)     | 41 kDa | 0.48      | []                    | 9  | 0  | 0  | 0  | 0  | 5  |
| MHC Class I antigen (Fragment) OS=Homo sapiens GN=HLA-A PE=3 SV=1                           | A0A078N209_HUMAN      | 38 kDa | 0.35      | []                    | 16 | 14 | 8  | 17 | 18 | 5  |
| MHC class I antigen (Fragment) OS=Homo sapiens GN=HLA-G PE=3 SV=1                           | A0A0H4LTY3_HUMAN      | 31 kDa | 0.37      | []                    | 0  | 0  | 0  | 0  | 1  | 0  |
| MHC class I antigen OS=Homo sapiens GN=HLA-A PE=3 SV=1                                      | D5H3V5_HUMAN          | 41 kDa | 0.17      | []                    | 0  | 0  | 0  | 12 | 0  | 7  |



|                                                                                                                    |                       |         |          |                       |    |    |    |    |    |    |
|--------------------------------------------------------------------------------------------------------------------|-----------------------|---------|----------|-----------------------|----|----|----|----|----|----|
| MHC class I antigen OS=Homo sapiens GN=HLA-A PE=3 SV=1                                                             | A0A0D6E067_HUMAN      | 41 kDa  | 0.38     | []                    | 21 | 15 | 12 | 21 | 23 | 13 |
| MHC class I antigen OS=Homo sapiens GN=HLA-B PE=3 SV=1                                                             | A0A0B7MI00_HUMAN      | 41 kDa  | 0.037    | BRAC1 low, Naive high | 14 | 13 | 13 | 0  | 11 | 11 |
| MHC class I antigen OS=Homo sapiens GN=HLA-C PE=2 SV=1                                                             | Q5UGI4_HUMAN          | 27 kDa  | 0.018    | BRAC1 low, Naive high | 14 | 15 | 14 | 10 | 0  | 9  |
| MHC class I antigen OS=Homo sapiens GN=HLA-C PE=3 SV=1                                                             | X5M224_HUMAN          | 41 kDa  | 0.015    | BRAC1 low, Naive high | 14 | 20 | 15 | 8  | 8  | 7  |
| Putative HLA class I histocompatibility antigen, alpha chain H OS=Homo sapiens GN=HLA-H PE=5 SV=3                  | HLAH_HUMAN            | 41 kDa  | 0.51     | []                    | 12 | 0  | 0  | 0  | 0  | 8  |
| cDNA FLJ51097, highly similar to HLA class I histocompatibility antigen, B-7alpha chain OS=Homo sapiens PE=2 SV=1  | B4DUK6_HUMAN          | 27 kDa  | 0.12     | []                    | 11 | 0  | 15 | 0  | 0  | 0  |
| cDNA FLJ52207, highly similar to HLA class I histocompatibility antigen, B-7 alpha chain OS=Homo sapiens PE=2 SV=1 | B4DV83_HUMAN          | 23 kDa  | 0.37     | []                    | 0  | 0  | 0  | 2  | 0  | 0  |
| MHC class I antigen (Fragment) OS=Homo sapiens GN=HLA PE=3 SV=1                                                    | Q0MX32_HUMAN          | 33 kDa  | 0.37     | []                    | 0  | 0  | 0  | 0  | 0  | 7  |
| MHC class I antigen (Fragment) OS=Homo sapiens GN=HLA-A PE=3 SV=1                                                  | F6IQX8_HUMAN          | 38 kDa  | 0.29     | []                    | 21 | 15 | 10 | 18 | 18 | 11 |
| MMS19 nucleotide excision repair protein homolog OS=Homo sapiens GN=MMS19 PE=1 SV=2                                | MMS19_HUMAN           | 113 kDa | 0.37     | []                    | 0  | 0  | 0  | 0  | 0  | 5  |
| MYO1B variant protein OS=Homo sapiens GN=MYO1B PE=2 SV=1                                                           | B0I1S9_HUMAN (+2)     | 132 kDa | 0.011    | BRAC1 low, Naive high | 7  | 17 | 16 | 4  | 2  | 3  |
| Magnesium transporter protein 1 OS=Homo sapiens GN=MAGT1 PE=1 SV=1                                                 | MAGT1_HUMAN (+3)      | 38 kDa  | 0.87     | []                    | 0  | 0  | 1  | 0  | 0  | 2  |
| Major facilitator superfamily domain-containing protein 10 OS=Homo sapiens GN=MFSD10 PE=1 SV=1                     | MFS10_HUMAN           | 48 kDa  | 0.97     | []                    | 1  | 1  | 0  | 1  | 1  | 2  |
| Major vault protein OS=Homo sapiens GN=MVP PE=1 SV=4                                                               | MVP_HUMAN (+1)        | 99 kDa  | 0.0047   | BRAC1 low, Naive high | 10 | 10 | 22 | 3  | 1  | 6  |
| Mal, T-cell differentiation protein 2, isoform CRA_a OS=Homo sapiens GN=MAL2 PE=4 SV=1                             | A0A024R9E4_HUMAN (+1) | 19 kDa  | 0.004    | BRAC1 high, Naive low | 0  | 0  | 0  | 7  | 6  | 5  |
| Malate dehydrogenase OS=Homo sapiens GN=MDH2 PE=3 SV=1                                                             | A0A024R4K3_HUMAN (+4) | 36 kDa  | 0.33     | []                    | 17 | 11 | 11 | 14 | 17 | 16 |
| Malate dehydrogenase, cytoplasmic OS=Homo sapiens GN=MDH1 PE=1 SV=4                                                | MDHC_HUMAN (+1)       | 36 kDa  | 0.82     | []                    | 0  | 0  | 5  | 2  | 1  | 2  |
| Malectin OS=Homo sapiens GN=MLEC PE=1 SV=1                                                                         | MLEC_HUMAN            | 32 kDa  | 0.3      | []                    | 3  | 2  | 3  | 4  | 6  | 10 |
| Mannose-1-phosphate guanyltransferase alpha OS=Homo sapiens GN=GMPPA PE=1 SV=1                                     | GMPPA_HUMAN (+1)      | 46 kDa  | 0.37     | []                    | 0  | 0  | 0  | 0  | 0  | 2  |
| Mannosyl-oligosaccharide glucosidase OS=Homo sapiens GN=MOGS PE=1 SV=5                                             | MOGS_HUMAN            | 92 kDa  | 0.46     | []                    | 1  | 2  | 6  | 3  | 5  | 16 |
| Matrin-3 OS=Homo sapiens GN=MATR3 PE=1 SV=2                                                                        | MATR3_HUMAN (+4)      | 95 kDa  | 0.55     | []                    | 0  | 0  | 2  | 0  | 0  | 1  |
| Matrix metalloproteinase 15 (Membrane-inserted), isoform CRA_a OS=Homo sapiens GN=MMP15 PE=4 SV=1                  | A0A024R6U8_HUMAN (+2) | 76 kDa  | 0.0058   | BRAC1 high, Naive low | 0  | 0  | 0  | 6  | 5  | 4  |
| Matrix-remodeling-associated protein 7 OS=Homo sapiens GN=MXRA7 PE=1 SV=1                                          | MXRA7_HUMAN           | 21 kDa  | 0.37     | []                    | 0  | 0  | 2  | 0  | 0  | 0  |
| Medium-chain specific acyl-CoA dehydrogenase, mitochondrial OS=Homo sapiens GN=ACADM PE=1 SV=1                     | ACADM_HUMAN (+4)      | 47 kDa  | 0.69     | []                    | 2  | 1  | 2  | 1  | 3  | 8  |
| Melanoma cell adhesion molecule, isoform CRA_a OS=Homo sapiens GN=MCAM PE=4 SV=1                                   | A0A024R315_HUMAN (+4) | 72 kDa  | 0.64     | []                    | 2  | 2  | 3  | 2  | 4  | 5  |
| Melanoma inhibitory activity protein 3 OS=Homo sapiens GN=MIA3 PE=1 SV=1                                           | MIA3_HUMAN            | 214 kDa | 0.37     | []                    | 0  | 0  | 0  | 0  | 0  | 2  |
| Membrane cofactor protein (Fragment) OS=Homo sapiens GN=CD46 PE=1 SV=1                                             | R4GN18_HUMAN          | 9 kDa   | 0.04     | BRAC1 high, Naive low | 0  | 0  | 0  | 2  | 3  | 1  |
| Membrane-associated progesterone receptor component 1 OS=Homo sapiens GN=PGRMC1 PE=1 SV=3                          | PGRMC1_HUMAN (+1)     | 22 kDa  | 0.043    | BRAC1 low, Naive high | 6  | 9  | 6  | 4  | 3  | 8  |
| Membrane-associated progesterone receptor component 2 OS=Homo sapiens GN=PGRMC2 PE=1 SV=1                          | PGRMC2_HUMAN          | 24 kDa  | 0.015    | BRAC1 low, Naive high | 3  | 3  | 3  | 1  | 1  | 3  |
| Metal transporter CNNM3 OS=Homo sapiens GN=CNNM3 PE=1 SV=1                                                         | CNNM3_HUMAN           | 76 kDa  | <0.00010 | BRAC1 high, Naive low | 0  | 0  | 0  | 4  | 5  | 6  |
| Metal transporter CNNM4 OS=Homo sapiens GN=CNNM4 PE=1 SV=3                                                         | CNNM4_HUMAN           | 87 kDa  | 0.00029  | BRAC1 high, Naive low | 0  | 0  | 0  | 2  | 2  | 2  |
| Metastasis related protein (Fragment) OS=Homo sapiens GN=MB2 PE=2 SV=1                                             | Q9HC85_HUMAN          | 10 kDa  | 0.19     | []                    | 0  | 2  | 1  | 0  | 0  | 0  |
| Methionine aminopeptidase 1 OS=Homo sapiens GN=METAP1 PE=1 SV=2                                                    | MAP11_HUMAN           | 43 kDa  | 0.37     | []                    | 0  | 0  | 0  | 0  | 0  | 4  |
| Microsomal glutathione S-transferase 1 OS=Homo sapiens GN=MGST1 PE=1 SV=1                                          | MGST1_HUMAN (+2)      | 18 kDa  | 0.52     | []                    | 0  | 2  | 1  | 0  | 2  | 0  |
| Microsomal glutathione S-transferase 3 OS=Homo sapiens GN=MGST3 PE=1 SV=1                                          | MGST3_HUMAN (+3)      | 17 kDa  | 0.092    | []                    | 2  | 1  | 1  | 0  | 0  | 1  |
| Microtubule-associated protein 1B OS=Homo sapiens GN=MAP1B PE=1 SV=2                                               | MAP1B_HUMAN (+1)      | 271 kDa | 0.033    | BRAC1 low, Naive high | 6  | 8  | 3  | 0  | 0  | 0  |
| Microtubule-associated protein OS=Homo sapiens GN=MAP4 PE=1 SV=1                                                   | E7EVA0_HUMAN (+1)     | 245 kDa | 0.024    | BRAC1 low, Naive high | 6  | 5  | 14 | 1  | 2  | 6  |
| Microtubule-associated protein RP/EB family member 1 OS=Homo sapiens GN=MAPRE1 PE=1 SV=3                           | MARE1_HUMAN (+2)      | 30 kDa  | 0.42     | []                    | 0  | 0  | 1  | 0  | 1  | 3  |
| Minor histocompatibility antigen H13 OS=Homo sapiens GN=HM13 PE=1 SV=1                                             | HM13_HUMAN            | 41 kDa  | 0.89     | []                    | 0  | 3  | 1  | 0  | 3  | 2  |
| Mitochondrial 2-oxoglutarate/malate carrier protein (Fragment) OS=Homo sapiens GN=SLC25A11 PE=1 SV=1               | I3L1P8_HUMAN (+2)     | 32 kDa  | 0.27     | []                    | 3  | 1  | 3  | 2  | 2  | 3  |
| Mitochondrial 10-formyltetrahydrofolate dehydrogenase OS=Homo sapiens GN=ALDH1L2 PE=1 SV=2                         | AL1L2_HUMAN (+1)      | 102 kDa | 0.017    | BRAC1 low, Naive high | 1  | 1  | 3  | 0  | 0  | 0  |
| Mitochondrial carrier homolog 2 OS=Homo sapiens GN=MTCH2 PE=1 SV=1                                                 | MTCH2_HUMAN (+1)      | 33 kDa  | 0.48     | []                    | 1  | 2  | 6  | 5  | 5  | 8  |
| Mitochondrial import inner membrane translocase subunit TIM44 OS=Homo sapiens GN=TIMM44 PE=1 SV=2                  | TIM44_HUMAN (+3)      | 51 kDa  | 0.42     | []                    | 0  | 0  | 1  | 0  | 1  | 3  |
| Mitochondrial import receptor subunit TOM34 OS=Homo sapiens GN=TOMM34 PE=1 SV=2                                    | TOM34_HUMAN           | 35 kDa  | 0.011    | BRAC1 high, Naive low | 0  | 0  | 0  | 2  | 1  | 3  |
| Mitochondrial import receptor subunit TOM40 homolog OS=Homo sapiens GN=TOMM40 PE=1 SV=1                            | TOM40_HUMAN (+1)      | 38 kDa  | 0.5      | []                    | 0  | 0  | 2  | 0  | 2  | 4  |
| Mitochondrial import receptor subunit TOM70 OS=Homo sapiens GN=TOMM70A PE=1 SV=1                                   | TOM70_HUMAN           | 67 kDa  | 0.38     | []                    | 0  | 5  | 0  | 4  | 7  | 7  |
| Mitogen-activated protein kinase 14 OS=Homo sapiens GN=MAPK14 PE=1 SV=3                                            | MK14_HUMAN (+3)       | 41 kDa  | 0.37     | []                    | 0  | 0  | 0  | 0  | 0  | 2  |
| Dual specificity mitogen-activated protein kinase kinase 2 OS=Homo sapiens GN=MAP2K2 PE=1 SV=1                     | MP2K2_HUMAN           | 44 kDa  | 0.37     | []                    | 0  | 0  | 0  | 0  | 0  | 3  |
| Mitogen-activated protein kinase kinase 1 OS=Homo sapiens GN=MAP2K1 PE=2 SV=1                                      | A4QPA9_HUMAN (+1)     | 43 kDa  | 0.078    | []                    | 0  | 0  | 0  | 2  | 1  | 6  |
| Mitotic interactor and substrate of PLK1 OS=Homo sapiens GN=MISP PE=1 SV=1                                         | MISP_HUMAN            | 75 kDa  | 0.017    | BRAC1 high, Naive low | 0  | 0  | 0  | 4  | 3  | 2  |
| Ezrin OS=Homo sapiens GN=EZR PE=1 SV=3                                                                             | E7EQR4_HUMAN (+2)     | 69 kDa  | 0.09     | []                    | 5  | 8  | 13 | 44 | 45 | 20 |
| Moesin OS=Homo sapiens GN=MSN PE=1 SV=3                                                                            | MOES_HUMAN (+1)       | 68 kDa  | 0.1      | []                    | 9  | 13 | 17 | 36 | 34 | 27 |
| Radixin OS=Homo sapiens GN=RDY PE=2 SV=1                                                                           | B0YJ88_HUMAN (+1)     | 69 kDa  | 0.26     | []                    | 0  | 0  | 6  | 6  | 8  | 5  |
| Monoacylglycerol lipase ABHD12 OS=Homo sapiens GN=ABHD12 PE=1 SV=2                                                 | ABD12_HUMAN           | 45 kDa  | 0.18     | []                    | 0  | 0  | 0  | 1  | 2  | 11 |
| Monoglyceride lipase OS=Homo sapiens GN=MGLL PE=1 SV=1                                                             | A0A0C4DFN3_HUMAN (+1) | 34 kDa  | 0.17     | []                    | 0  | 0  | 0  | 1  | 0  | 3  |
| Mothers against decapentaplegic homolog 2 OS=Homo sapiens GN=SMAD2 PE=1 SV=1                                       | SMAD2_HUMAN (+5)      | 52 kDa  | 0.37     | []                    | 0  | 0  | 0  | 0  | 0  | 3  |
| Multidrug resistance-associated protein 1 OS=Homo sapiens GN=ABCC1 PE=1 SV=3                                       | MRP1_HUMAN            | 172 kDa | 0.019    | BRAC1 low, Naive high | 3  | 3  | 6  | 3  | 1  | 4  |
| Multidrug resistance-associated protein 4 OS=Homo sapiens GN=ABCC4 PE=1 SV=3                                       | MRP4_HUMAN            | 150 kDa | 0.027    | BRAC1 high, Naive low | 0  | 0  | 0  | 12 | 15 | 6  |
| Myelin protein zero-like 1, isoform CRA_b OS=Homo sapiens GN=MPZL1 PE=2 SV=1                                       | A8K5D4_HUMAN (+3)     | 29 kDa  | 0.077    | []                    | 0  | 0  | 0  | 4  | 2  | 1  |
| Myoferlin OS=Homo sapiens GN=MYOF PE=1 SV=1                                                                        | MYOF_HUMAN            | 235 kDa | 0.00077  | BRAC1 low, Naive high | 40 | 72 | 89 | 1  | 0  | 5  |
| tr B3KSL7 B3KSL7_HUMAN cDNA FLJ36571 fis, clone TRACH2012242, highly similar to Myoferlin...                       | B3KSL7_HUMAN          | ?       | 0.37     | []                    | 0  | 0  | 5  | 0  | 0  | 0  |
| Myosin light chain kinase, smooth muscle OS=Homo sapiens GN=MYLK PE=1 SV=4                                         | MYLK_HUMAN            | 211 kDa | 0.023    | BRAC1 low, Naive high | 5  | 14 | 9  | 0  | 0  | 0  |

|                                                                                                                   |                        |         |           |                       |    |     |     |     |     |    |
|-------------------------------------------------------------------------------------------------------------------|------------------------|---------|-----------|-----------------------|----|-----|-----|-----|-----|----|
| Myosin light polypeptide 6 OS=Homo sapiens GN=MYL6 PE=1 SV=1                                                      | F8W1R7_HUMAN (+4)      | 16 kDa  | 0.29      | []                    | 8  | 4   | 5   | 6   | 7   | 3  |
| Myosin regulatory light chain 12A OS=Homo sapiens GN=MYL12A PE=1 SV=1                                             | J3QR53_HUMAN (+3)      | 20 kDa  | 0.014     | BRAC1 low, Naive high | 2  | 2   | 3   | 2   | 1   | 0  |
| Myosin regulatory light polypeptide 9 OS=Homo sapiens GN=MYL9 PE=1 SV=4                                           | MYL9_HUMAN (+2)        | 20 kDa  | 0.015     | BRAC1 low, Naive high | 1  | 1   | 2   | 1   | 0   | 0  |
| Myosin, heavy polypeptide 9, non-muscle, isoform CRA_a OS=Homo sapiens GN=MYH9 PE=4 SV=1                          | A0A024R1N1_HUMAN (+1)  | 227 kDa | < 0.00010 | BRAC1 low, Naive high | 91 | 119 | 148 | 66  | 61  | 89 |
| Myosin-10 OS=Homo sapiens GN=MYH10 PE=1 SV=3                                                                      | MYH10_HUMAN            | 229 kDa | 0.028     | BRAC1 low, Naive high | 11 | 18  | 40  | 5   | 5   | 12 |
| Myosin-14 (Fragment) OS=Homo sapiens GN=MYH14 PE=1 SV=6                                                           | M0QY43_HUMAN           | 114 kDa | 0.00038   | BRAC1 high, Naive low | 0  | 0   | 0   | 26  | 27  | 26 |
| Myosin-14 OS=Homo sapiens GN=MYH14 PE=1 SV=2                                                                      | MYH14_HUMAN            | 228 kDa | 0.0029    | BRAC1 high, Naive low | 8  | 9   | 10  | 63  | 59  | 56 |
| Myristoylated alanine-rich C-kinase substrate OS=Homo sapiens GN=MARCKS PE=1 SV=1                                 | A0A087WZ7_HUMAN (+1)   | 32 kDa  | 0.016     | BRAC1 low, Naive high | 13 | 19  | 20  | 14  | 16  | 7  |
| N(G),N(G)-dimethylarginine dimethylaminohydrolase 2 OS=Homo sapiens GN=DDAH2 PE=1 SV=1                            | DDAH2_HUMAN (+1)       | 30 kDa  | 0.76      | []                    | 1  | 1   | 0   | 2   | 0   | 1  |
| N-acetyl-D-glucosamine kinase OS=Homo sapiens GN=NAGK PE=1 SV=4                                                   | NAGK_HUMAN (+4)        | 37 kDa  | 0.37      | []                    | 0  | 0   | 0   | 0   | 0   | 3  |
| N-acetylgalactosaminyltransferase 7 OS=Homo sapiens GN=GALNT7 PE=1 SV=1                                           | GALT7_HUMAN            | 75 kDa  | 0.0027    | BRAC1 high, Naive low | 0  | 0   | 0   | 1   | 1   | 2  |
| N-alpha-acetyltransferase 15, NatA auxiliary subunit OS=Homo sapiens GN=NAA15 PE=1 SV=1                           | NAA15_HUMAN (+4)       | 101 kDa | 0.37      | []                    | 0  | 0   | 0   | 0   | 0   | 2  |
| N-ethylmaleimide-sensitive factor attachment protein, alpha, isoform CRA_c OS=Homo sapiens GN=NAPA PE=4 SV=1      | A0A024R0R9_HUMAN (+1)  | 33 kDa  | 0.14      | []                    | 0  | 0   | 3   | 4   | 3   | 12 |
| N-ethylmaleimide-sensitive factor attachment protein, gamma, isoform CRA_b OS=Homo sapiens GN=NAPG PE=2 SV=1      | Q6FHY4_HUMAN (+1)      | 35 kDa  | 0.0027    | BRAC1 high, Naive low | 0  | 0   | 0   | 1   | 1   | 2  |
| N-myc downstream regulated gene 1, isoform CRA_b OS=Homo sapiens GN=NDRG1 PE=4 SV=1                               | A0A024R9I3_HUMAN (+11) | 39 kDa  | 0.96      | []                    | 1  | 1   | 2   | 1   | 1   | 5  |
| N-terminal kinase-like protein OS=Homo sapiens GN=SCYL1 PE=1 SV=1                                                 | NTKL_HUMAN (+3)        | 90 kDa  | 0.37      | []                    | 0  | 0   | 0   | 0   | 0   | 2  |
| NAD(P) transhydrogenase, mitochondrial OS=Homo sapiens GN=NNT PE=1 SV=3                                           | NNTM_HUMAN (+2)        | 114 kDa | 0.17      | []                    | 0  | 1   | 3   | 0   | 0   | 0  |
| NAD(P)H dehydrogenase [quinone] 1 OS=Homo sapiens GN=NQO1 PE=1 SV=1                                               | NQO1_HUMAN (+1)        | 31 kDa  | 0.062     | []                    | 0  | 0   | 3   | 4   | 5   | 11 |
| NADH dehydrogenase (Ubiquinone) 1 alpha subcomplex, 10, 42kDa, isoform CRA_b OS=Homo sapiens GN=NDUFA10 PE=4 SV=1 | A0A024R4B3_HUMAN (+5)  | 41 kDa  | 0.45      | []                    | 1  | 2   | 2   | 2   | 3   | 1  |
| NADH dehydrogenase [ubiquinone] flavoprotein 1, mitochondrial OS=Homo sapiens GN=NDUFV1 PE=1 SV=4                 | NDUV1_HUMAN (+6)       | 51 kDa  | 0.82      | []                    | 0  | 0   | 2   | 0   | 1   | 1  |
| NADH dehydrogenase [ubiquinone] iron-sulfur protein 2, mitochondrial OS=Homo sapiens GN=NDUFS2 PE=1 SV=2          | NDUS2_HUMAN (+1)       | 53 kDa  | 0.82      | []                    | 0  | 1   | 2   | 0   | 1   | 3  |
| NADH dehydrogenase [ubiquinone] iron-sulfur protein 3, mitochondrial OS=Homo sapiens GN=NDUFS3 PE=1 SV=1          | NDUS3_HUMAN (+1)       | 30 kDa  | 0.78      | []                    | 0  | 1   | 3   | 1   | 3   | 3  |
| NADH-cytochrome b5 reductase OS=Homo sapiens GN=CYB5R3 PE=3 SV=1                                                  | A0A024R4X0_HUMAN (+1)  | 33 kDa  | 0.00085   | BRAC1 low, Naive high | 9  | 11  | 14  | 1   | 4   | 8  |
| NADH-ubiquinone oxidoreductase 75 kDa subunit, mitochondrial OS=Homo sapiens GN=NDUFS1 PE=1 SV=1                  | B4DJ81_HUMAN (+2)      | 67 kDa  | 0.33      | []                    | 1  | 3   | 7   | 3   | 3   | 4  |
| NADPH-cytochrome P450 reductase OS=Homo sapiens PE=2 SV=1                                                         | A8K3B4_HUMAN (+4)      | 77 kDa  | 0.0076    | BRAC1 high, Naive low | 1  | 0   | 1   | 4   | 6   | 7  |
| NADPH:adrenodoxin oxidoreductase, mitochondrial OS=Homo sapiens GN=FDXR PE=1 SV=3                                 | ADRO_HUMAN (+9)        | 54 kDa  | 0.2       | []                    | 1  | 0   | 2   | 0   | 0   | 1  |
| Na(+)/H(+) exchange regulatory cofactor NHE-RF1 OS=Homo sapiens GN=SLC9A3R1 PE=1 SV=4                             | NHRF1_HUMAN            | 39 kDa  | 0.012     | BRAC1 high, Naive low | 0  | 0   | 0   | 7   | 7   | 4  |
| Na(+)/H(+) exchange regulatory cofactor NHE-RF2 (Fragment) OS=Homo sapiens GN=SLC9A3R2 PE=1 SV=1                  | H3BMF5_HUMAN           | 17 kDa  | 0.37      | []                    | 0  | 0   | 0   | 0   | 1   | 0  |
| Na(+)/H(+) exchange regulatory cofactor NHE-RF2 OS=Homo sapiens GN=SLC9A3R2 PE=1 SV=2                             | NHRF2_HUMAN (+1)       | 37 kDa  | 0.00018   | BRAC1 high, Naive low | 0  | 0   | 0   | 6   | 7   | 7  |
| Nck-associated protein 1 OS=Homo sapiens GN=NCKAP1 PE=1 SV=1                                                      | NCKP1_HUMAN            | 129 kDa | 0.013     | BRAC1 high, Naive low | 1  | 0   | 2   | 5   | 5   | 7  |
| Nectin-2 OS=Homo sapiens GN=PVRL2 PE=1 SV=1                                                                       | PVRL2_HUMAN            | 58 kDa  | 0.58      | []                    | 1  | 1   | 2   | 3   | 4   | 1  |
| Polio virus related protein 2, alpha isoform (Fragment) OS=Homo sapiens PE=4 SV=1                                 | Q9UEI6_HUMAN           | 48 kDa  | 0.8       | []                    | 1  | 1   | 2   | 4   | 3   | 0  |
| Nephrilysin OS=Homo sapiens GN=MME PE=1 SV=2                                                                      | NEP_HUMAN (+1)         | 86 kDa  | 0.049     | BRAC1 low, Naive high | 3  | 3   | 12  | 0   | 0   | 0  |
| Nestin OS=Homo sapiens GN=NES PE=1 SV=2                                                                           | NEST_HUMAN (+3)        | 177 kDa | 0.37      | []                    | 0  | 0   | 2   | 0   | 0   | 0  |
| Neural cell adhesion molecule L1 OS=Homo sapiens GN=L1CAM PE=1 SV=2                                               | L1CAM_HUMAN (+2)       | 140 kDa | < 0.00010 | BRAC1 low, Naive high | 4  | 5   | 7   | 0   | 0   | 0  |
| Neurobeachin-like protein 2 OS=Homo sapiens GN=NBEL2 PE=1 SV=2                                                    | NBEL2_HUMAN            | 303 kDa | 0.37      | []                    | 0  | 0   | 0   | 0   | 0   | 5  |
| Neuroblast differentiation-associated protein AHNAK OS=Homo sapiens GN=AHNAK PE=1 SV=2                            | AHNAK_HUMAN            | 629 kDa | 0.47      | []                    | 82 | 134 | 80  | 174 | 129 | 40 |
| Neuroblastoma RAS viral (V-ras) oncogene homolog OS=Homo sapiens GN=NRAS PE=2 SV=1                                | Q5U091_HUMAN (+1)      | 21 kDa  | 0.58      | []                    | 0  | 2   | 0   | 1   | 2   | 3  |
| V-Ki-ras2 Kirsten rat sarcoma viral oncogene homolog, isoform CRA_b OS=Homo sapiens GN=KRAS PE=1 SV=1             | A0A024RAV5_HUMAN       | 21 kDa  | 0.29      | []                    | 0  | 1   | 1   | 3   | 2   | 1  |
| Neurofascin OS=Homo sapiens GN=NFASC PE=1 SV=4                                                                    | NFASC_HUMAN (+2)       | 150 kDa | 0.37      | []                    | 0  | 2   | 0   | 0   | 0   | 0  |
| Neurofibromin OS=Homo sapiens GN=NF1 PE=1 SV=2                                                                    | NF1_HUMAN              | 319 kDa | 0.005     | BRAC1 high, Naive low | 0  | 0   | 0   | 2   | 3   | 5  |
| Neuropilin-1 OS=Homo sapiens GN=NRP1 PE=1 SV=3                                                                    | NRP1_HUMAN (+4)        | 103 kDa | 0.0044    | BRAC1 low, Naive high | 3  | 2   | 4   | 0   | 0   | 0  |
| Neuroplastin OS=Homo sapiens GN=NPTN PE=1 SV=2                                                                    | NPTN_HUMAN (+1)        | 44 kDa  | 0.0014    | BRAC1 low, Naive high | 4  | 4   | 6   | 3   | 2   | 2  |
| Neutral cholesterol ester hydrolase 1 OS=Homo sapiens GN=NCEH1 PE=1 SV=1                                          | A0A0A0MTJ9_HUMAN (+1)  | 50 kDa  | 0.093     | []                    | 4  | 2   | 5   | 1   | 3   | 4  |
| Neutrophil gelatinase-associated lipocalin OS=Homo sapiens GN=NGAL PE=2 SV=1                                      | B2ZDQ1_HUMAN (+2)      | 23 kDa  | < 0.00010 | BRAC1 high, Naive low | 0  | 0   | 0   | 2   | 2   | 3  |
| Nexilin OS=Homo sapiens GN=NEXN PE=1 SV=1                                                                         | NEXN_HUMAN (+2)        | 81 kDa  | 0.37      | []                    | 0  | 0   | 2   | 0   | 0   | 0  |
| Nicalin OS=Homo sapiens PE=2 SV=1                                                                                 | B2RA56_HUMAN (+1)      | 62 kDa  | 0.52      | []                    | 0  | 1   | 5   | 2   | 4   | 8  |
| Nicastrin OS=Homo sapiens GN=NCSTN PE=1 SV=2                                                                      | NICA_HUMAN             | 78 kDa  | 0.92      | []                    | 1  | 1   | 3   | 1   | 2   | 6  |
| Nicotinate phosphoribosyltransferase OS=Homo sapiens GN=NAPRT PE=1 SV=2                                           | PNCB_HUMAN             | 58 kDa  | 0.3       | []                    | 0  | 0   | 0   | 1   | 0   | 11 |
| PP3856 OS=Homo sapiens PE=2 SV=1                                                                                  | Q8WY82_HUMAN           | 15 kDa  | 0.37      | []                    | 0  | 0   | 0   | 0   | 0   | 2  |
| Nidogen-2 OS=Homo sapiens GN=NID2 PE=1 SV=3                                                                       | NID2_HUMAN (+3)        | 151 kDa | 0.0021    | BRAC1 low, Naive high | 1  | 2   | 2   | 0   | 0   | 0  |
| Niemann-Pick C1 protein OS=Homo sapiens GN=NPC1 PE=1 SV=2                                                         | NPC1_HUMAN (+2)        | 142 kDa | 0.5       | []                    | 0  | 2   | 0   | 0   | 0   | 1  |
| Nodal modulator 1 OS=Homo sapiens GN=NOMO1 PE=1 SV=1                                                              | A0A087X117_HUMAN (+2)  | 139 kDa | 0.87      | []                    | 0  | 4   | 7   | 2   | 4   | 14 |
| Nodal modulator 3 OS=Homo sapiens GN=NOMO3 PE=1 SV=1                                                              | J3KN36_HUMAN (+2)      | 139 kDa | 1         | []                    | 0  | 3   | 7   | 1   | 3   | 12 |
| Non-POU domain-containing octamer-binding protein OS=Homo sapiens GN=NONO PE=1 SV=4                               | NONO_HUMAN (+1)        | 54 kDa  | 0.23      | []                    | 0  | 0   | 0   | 0   | 1   | 5  |
| Non-specific serine/threonine protein kinase OS=Homo sapiens GN=CDC42BPA PE=1 SV=1                                | A0A0A0MRJ0_HUMAN (+3)  | 194 kDa | 0.091     | []                    | 0  | 0   | 0   | 3   | 1   | 1  |
| Non-specific serine/threonine protein kinase OS=Homo sapiens GN=PAK4 PE=4 SV=1                                    | A0A024R0J1_HUMAN (+2)  | 64 kDa  | 0.012     | BRAC1 high, Naive low | 0  | 0   | 0   | 3   | 5   | 3  |
| Non-specific serine/threonine protein kinase OS=Homo sapiens GN=PAK1 PE=4 SV=1                                    | A0A024R5P0_HUMAN (+5)  | 61 kDa  | 0.028     | BRAC1 high, Naive low | 0  | 0   | 0   | 1   | 2   | 1  |
| Non-specific serine/threonine protein kinase OS=Homo sapiens GN=PAK5 PE=2 SV=1                                    | A8K5M4_HUMAN (+1)      | 58 kDa  | 0.0058    | BRAC1 high, Naive low | 0  | 0   | 0   | 1   | 2   | 2  |
| Nuclear migration protein nudC OS=Homo sapiens GN=NUDC PE=1 SV=1                                                  | NUDC_HUMAN             | 38 kDa  | 0.12      | []                    | 0  | 0   | 0   | 2   | 2   | 0  |
| Nuclear pore complex protein Nup205 OS=Homo sapiens GN=NUP205 PE=1 SV=3                                           | NUP205_HUMAN           | 228 kDa | 0.13      | []                    | 0  | 0   | 0   | 0   | 1   | 2  |
| Cold shock domain protein A, isoform CRA_a OS=Homo sapiens GN=CSDA PE=4 SV=1                                      | A0A024RAQ1_HUMAN (+2)  | 40 kDa  | 0.99      | []                    | 0  | 2   | 4   | 2   | 3   | 4  |

|                                                                                                                                                       |                        |         |         |                       |    |    |    |    |    |    |
|-------------------------------------------------------------------------------------------------------------------------------------------------------|------------------------|---------|---------|-----------------------|----|----|----|----|----|----|
| Nuclease-sensitive element-binding protein 1 OS=Homo sapiens GN=YBX1 PE=1 SV=3                                                                        | YBOX1_HUMAN            | 36 kDa  | 0.29    | []                    | 4  | 6  | 8  | 4  | 8  | 12 |
| Nucleolin, isoform CRA_b OS=Homo sapiens GN=NCL PE=4 SV=1                                                                                             | A0A024R4A0_HUMAN (+4)  | 77 kDa  | 0.11    | []                    | 0  | 0  | 4  | 4  | 5  | 10 |
| Nucleoside diphosphate kinase A OS=Homo sapiens GN=NME1 PE=1 SV=1                                                                                     | NDKA_HUMAN             | 17 kDa  | 0.00029 | BRAC1 high, Naive low | 0  | 0  | 0  | 3  | 3  | 3  |
| Nucleoside diphosphate kinase B OS=Homo sapiens GN=NME2 PE=1 SV=1                                                                                     | NDKB_HUMAN (+2)        | 17 kDa  | 0.22    | BRAC1 high, Naive low | 0  | 0  | 1  | 2  | 2  | 4  |
| Nucleosome assembly protein 1-like 1, isoform CRA_a OS=Homo sapiens GN=NAP1L1 PE=3 SV=1                                                               | A0A024RBB7_HUMAN (+12) | 45 kDa  | 0.22    | []                    | 1  | 0  | 1  | 1  | 3  | 4  |
| Nucleosome assembly protein 1-like 4 OS=Homo sapiens GN=NAP1L4 PE=1 SV=1                                                                              | NP1L4_HUMAN (+4)       | 43 kDa  | 0.5     | []                    | 0  | 0  | 1  | 0  | 1  | 2  |
| OCLIA domain-containing protein 1 OS=Homo sapiens GN=OC1AD1 PE=1 SV=1                                                                                 | OCAD1_HUMAN (+1)       | 28 kDa  | 0.37    | []                    | 0  | 0  | 2  | 0  | 0  | 0  |
| Occludin OS=Homo sapiens GN=OCLN PE=1 SV=1                                                                                                            | A0A0G2JMZ8_HUMAN (+1)  | 59 kDa  | 0.04    | BRAC1 high, Naive low | 0  | 0  | 0  | 4  | 6  | 2  |
| Omega-amidase NIT2 OS=Homo sapiens GN=NIT2 PE=1 SV=1                                                                                                  | NIT2_HUMAN (+1)        | 31 kDa  | 0.028   | BRAC1 high, Naive low | 0  | 0  | 0  | 1  | 2  | 1  |
| Opioid growth factor receptor OS=Homo sapiens GN=OGFR PE=1 SV=3                                                                                       | OGFR_HUMAN             | 73 kDa  | 0.37    | []                    | 0  | 0  | 0  | 0  | 0  | 4  |
| Ornithine aminotransferase, mitochondrial OS=Homo sapiens GN=OAT PE=1 SV=1                                                                            | OAT_HUMAN              | 49 kDa  | 0.082   | []                    | 2  | 4  | 3  | 0  | 3  | 3  |
| Overexpressed in colon carcinoma 1 protein OS=Homo sapiens GN=OCC1 PE=1 SV=2                                                                          | OCC1_HUMAN (+1)        | 6 kDa   | 0.37    | []                    | 0  | 0  | 2  | 0  | 0  | 0  |
| Oxysterol-binding protein 1 OS=Homo sapiens GN=OSBP PE=1 SV=1                                                                                         | OSBP1_HUMAN            | 89 kDa  | 0.25    | []                    | 0  | 0  | 0  | 1  | 0  | 6  |
| Oxysterol-binding protein OS=Homo sapiens GN=OSBPL8 PE=3 SV=1                                                                                         | A0A024RBB8_HUMAN (+2)  | 101 kDa | 0.088   | []                    | 0  | 0  | 1  | 2  | 1  | 2  |
| PDZ and LIM domain 5, isoform CRA_c OS=Homo sapiens GN=PDLIM5 PE=4 SV=1                                                                               | A0A024RDE8_HUMAN (+1)  | 64 kDa  | 0.31    | []                    | 1  | 1  | 1  | 2  | 4  | 2  |
| PDZ and LIM domain protein 1 OS=Homo sapiens GN=PDLIM1 PE=1 SV=4                                                                                      | PDLI1_HUMAN (+1)       | 36 kDa  | 0.95    | []                    | 3  | 3  | 2  | 8  | 4  | 1  |
| PDZ and LIM domain protein 7 OS=Homo sapiens GN=PDLIM7 PE=1 SV=1                                                                                      | PDLI7_HUMAN            | 50 kDa  | 0.054   | []                    | 1  | 4  | 8  | 0  | 0  | 1  |
| PDZ domain-containing protein GIPC2 OS=Homo sapiens GN=GIPC2 PE=1 SV=1                                                                                | GIPC2_HUMAN            | 34 kDa  | 0.37    | []                    | 0  | 0  | 0  | 0  | 0  | 3  |
| PTGFRN protein (Fragment) OS=Homo sapiens GN=PTGFRN PE=2 SV=1                                                                                         | Q1WWL2_HUMAN (+1)      | 83 kDa  | 0.00029 | BRAC1 high, Naive low | 0  | 0  | 0  | 3  | 3  | 3  |
| Prostaglandin F2 receptor negative regulator OS=Homo sapiens GN=PTGFRN PE=1 SV=2                                                                      | FPRP_HUMAN             | 99 kDa  | 0.00029 | BRAC1 high, Naive low | 0  | 0  | 0  | 2  | 2  | 2  |
| Pachytene checkpoint protein 2 homolog OS=Homo sapiens GN=TRIP13 PE=1 SV=2                                                                            | PCH2_HUMAN             | 49 kDa  | 0.027   | BRAC1 high, Naive low | 0  | 0  | 0  | 1  | 2  | 4  |
| Paladin OS=Homo sapiens GN=PALD1 PE=1 SV=3                                                                                                            | PALD_HUMAN (+1)        | 97 kDa  | 0.37    | []                    | 0  | 0  | 0  | 0  | 0  | 2  |
| Palladin OS=Homo sapiens GN=PALLD PE=1 SV=3                                                                                                           | PALLD_HUMAN (+4)       | 151 kDa | 0.13    | []                    | 0  | 1  | 2  | 0  | 0  | 0  |
| Palmitoyltransferase OS=Homo sapiens GN=ZDHHC5 PE=3 SV=1                                                                                              | A0A024R546_HUMAN (+1)  | 78 kDa  | 0.12    | []                    | 0  | 0  | 0  | 3  | 4  | 0  |
| Palmitoyltransferase OS=Homo sapiens GN=ZDHHC20 PE=1 SV=1                                                                                             | B4DRN8_HUMAN (+1)      | 34 kDa  | 0.031   | BRAC1 high, Naive low | 0  | 0  | 0  | 2  | 1  | 1  |
| Paraoxonase 2, isoform CRA_a OS=Homo sapiens GN=PON2 PE=1 SV=1                                                                                        | A0A0J9YXF2_HUMAN (+2)  | 42 kDa  | 0.67    | []                    | 1  | 2  | 2  | 1  | 0  | 6  |
| Paraspeckle component 1 OS=Homo sapiens GN=PSPC1 PE=1 SV=1                                                                                            | PSPC1_HUMAN (+2)       | 59 kDa  | 0.37    | []                    | 0  | 0  | 0  | 0  | 0  | 2  |
| Pentatricopeptide repeat domain-containing protein 3, mitochondrial OS=Homo sapiens GN=PTCD3 PE=1 SV=3                                                | PTCD3_HUMAN            | 79 kDa  | 0.37    | []                    | 0  | 0  | 0  | 0  | 0  | 3  |
| Peptidyl-prolyl cis-trans isomerase B OS=Homo sapiens GN=PPIB PE=1 SV=2                                                                               | PPIB_HUMAN (+1)        | 24 kDa  | 0.84    | []                    | 5  | 5  | 4  | 8  | 9  | 9  |
| Peptidyl-prolyl cis-trans isomerase FKBP4 OS=Homo sapiens GN=FKBP4 PE=1 SV=3                                                                          | FKBP4_HUMAN            | 52 kDa  | 0.07    | []                    | 0  | 0  | 0  | 1  | 1  | 4  |
| Peptidyl-prolyl cis-trans isomerase FKBP9 OS=Homo sapiens GN=FKBP9 PE=1 SV=2                                                                          | FKBP9_HUMAN (+2)       | 63 kDa  | 0.029   | BRAC1 low, Naive high | 1  | 3  | 5  | 0  | 0  | 1  |
| Peptidyl-prolyl cis-trans isomerase FKBP10 OS=Homo sapiens GN=FKBP10 PE=1 SV=1                                                                        | FKB10_HUMAN (+2)       | 64 kDa  | 0.2     | []                    | 1  | 1  | 7  | 0  | 0  | 2  |
| Peptidyl-prolyl cis-trans isomerase OS=Homo sapiens PE=2 SV=1                                                                                         | A8K486_HUMAN (+2)      | 18 kDa  | 0.088   | []                    | 1  | 4  | 4  | 21 | 18 | 8  |
| Perilipin-3 OS=Homo sapiens GN=PLIN3 PE=1 SV=3                                                                                                        | PLIN3_HUMAN            | 47 kDa  | 0.0059  | BRAC1 low, Naive high | 2  | 2  | 5  | 0  | 0  | 0  |
| Peripheral plasma membrane protein CASK OS=Homo sapiens GN=CASK PE=1 SV=3                                                                             | CASK_HUMAN             | 105 kDa | 0.12    | []                    | 0  | 1  | 0  | 7  | 10 | 1  |
| Periplakin OS=Homo sapiens GN=PPL PE=1 SV=1                                                                                                           | K7EKI8_HUMAN (+2)      | 204 kDa | 0.13    | []                    | 0  | 0  | 0  | 0  | 1  | 2  |
| Peroxiredoxin-1 OS=Homo sapiens GN=PRDX1 PE=1 SV=1                                                                                                    | PRDX1_HUMAN (+1)       | 22 kDa  | 0.77    | []                    | 6  | 4  | 3  | 10 | 6  | 4  |
| Peroxiredoxin-4 OS=Homo sapiens GN=PRDX4 PE=1 SV=1                                                                                                    | PRDX4_HUMAN (+1)       | 31 kDa  | 0.2     | []                    | 7  | 8  | 4  | 8  | 6  | 3  |
| Peroxiredoxin-5, mitochondrial OS=Homo sapiens GN=PRDX5 PE=1 SV=4                                                                                     | PRDX5_HUMAN (+1)       | 22 kDa  | 0.071   | []                    | 0  | 0  | 1  | 4  | 2  | 2  |
| Peroxiredoxin-6 OS=Homo sapiens GN=PRDX6 PE=1 SV=3                                                                                                    | PRDX6_HUMAN (+1)       | 25 kDa  | 0.28    | []                    | 4  | 1  | 6  | 0  | 2  | 7  |
| Peroxisomal acyl-coenzyme A oxidase 1 OS=Homo sapiens GN=ACOX1 PE=1 SV=3                                                                              | ACOX1_HUMAN (+3)       | 74 kDa  | 0.29    | []                    | 0  | 0  | 1  | 0  | 2  | 10 |
| Peroxisomal membrane protein PEX14 OS=Homo sapiens GN=PEX14 PE=1 SV=1                                                                                 | PEX14_HUMAN (+1)       | 41 kDa  | 0.37    | []                    | 0  | 0  | 0  | 0  | 0  | 2  |
| Peroxisomal multifunctional enzyme type 2 OS=Homo sapiens GN=HSD17B4 PE=1 SV=3                                                                        | DHB4_HUMAN             | 80 kDa  | 0.99    | []                    | 10 | 16 | 15 | 19 | 25 | 26 |
| Peroxisome proliferator activated receptor interacting complex protein OS=Homo sapiens GN=PRIC295 PE=2 SV=1                                           | E1NZA1_HUMAN           | 293 kDa | 0.043   | BRAC1 high, Naive low | 0  | 0  | 4  | 16 | 16 | 49 |
| Phenylalanine--tRNA ligase alpha subunit (Fragment) OS=Homo sapiens GN=FARSA PE=1 SV=6                                                                | K7EK06_HUMAN (+3)      | 18 kDa  | 0.21    | []                    | 2  | 1  | 2  | 2  | 1  | 2  |
| Phosphatidylinositol 3,4,5-trisphosphate 5-phosphatase 1 OS=Homo sapiens GN=INPP5D PE=1 SV=2                                                          | SHIP1_HUMAN            | 133 kDa | 0.37    | []                    | 0  | 0  | 0  | 0  | 0  | 2  |
| Phosphatidylinositol binding clathrin assembly protein, isoform CRA_c OS=Homo sapiens GN=PICALM PE=4 SV=1                                             | A0A024R5L7_HUMAN (+4)  | 66 kDa  | 0.16    | []                    | 3  | 3  | 4  | 7  | 9  | 7  |
| Phosphatidylinositol-binding clathrin assembly protein (Fragment) OS=Homo sapiens GN=PICALM PE=1 SV=1                                                 | H0YEF7_HUMAN (+1)      | 31 kDa  | 0.27    | []                    | 3  | 0  | 2  | 6  | 8  | 4  |
| Phosphatidylinositol-4-phosphate 3-kinase, catalytic subunit type 2 alpha OS=Homo sapiens GN=PIK3C2A PE=4 SV=1                                        | L7RRS0_HUMAN (+1)      | 191 kDa | 0.13    | []                    | 0  | 0  | 0  | 1  | 0  | 2  |
| Phosphatidylserine synthase 1 OS=Homo sapiens GN=PTDSS1 PE=1 SV=1                                                                                     | PTSS1_HUMAN (+2)       | 56 kDa  | 0.47    | []                    | 0  | 1  | 0  | 0  | 2  | 2  |
| Phosphoenolpyruvate carboxykinase [GTP], mitochondrial OS=Homo sapiens GN=PCK2 PE=1 SV=3                                                              | PCKGM_HUMAN            | 71 kDa  | 0.2     | []                    | 0  | 1  | 2  | 4  | 2  | 3  |
| Phosphoglycerate kinase 1 OS=Homo sapiens GN=PGK1 PE=1 SV=3                                                                                           | PGK1_HUMAN (+1)        | 45 kDa  | 0.55    | []                    | 7  | 8  | 13 | 20 | 12 | 20 |
| Phosphoglycerate mutase 1 OS=Homo sapiens GN=PGAM1 PE=1 SV=2                                                                                          | PGAM1_HUMAN (+3)       | 29 kDa  | 0.68    | []                    | 2  | 2  | 5  | 5  | 3  | 5  |
| Phospholipase A-2-activating protein OS=Homo sapiens GN=PLAA PE=1 SV=2                                                                                | PLAP_HUMAN (+2)        | 87 kDa  | 0.37    | []                    | 0  | 0  | 0  | 0  | 0  | 2  |
| Phospholipase D3 OS=Homo sapiens GN=PLD3 PE=1 SV=1                                                                                                    | PLD3_HUMAN (+1)        | 55 kDa  | 0.14    | []                    | 1  | 2  | 0  | 0  | 0  | 0  |
| Phospholipid hydroperoxide glutathione peroxidase, mitochondrial OS=Homo sapiens GN=GPX4 PE=1 SV=3                                                    | GPX4_HUMAN (+9)        | 22 kDa  | 0.37    | []                    | 0  | 0  | 0  | 0  | 0  | 2  |
| Phospholipid scramblase 1 OS=Homo sapiens GN=PLSCR1 PE=1 SV=1                                                                                         | C9J7K9_HUMAN (+1)      | 34 kDa  | 0.23    | []                    | 1  | 0  | 0  | 6  | 4  | 0  |
| Phospholipid-transporting ATPase IC OS=Homo sapiens GN=ATP8B1 PE=1 SV=3                                                                               | AT8B1_HUMAN            | 144 kDa | 0.071   | []                    | 0  | 0  | 0  | 8  | 3  | 3  |
| Phosphoribosylaminoimidazole carboxylase, phosphoribosylaminoimidazole succinocarboxamide synthetase, isoform CRA_c OS=Homo sapiens GN=PRF1 PE=1 SV=1 | A0A024RD93_HUMAN (+2)  | 47 kDa  | 0.063   | []                    | 0  | 1  | 1  | 2  | 7  | 9  |
| Phosphoserine aminotransferase OS=Homo sapiens GN=PSAT1 PE=3 SV=1                                                                                     | A0A024R222_HUMAN (+3)  | 40 kDa  | 0.6     | []                    | 0  | 0  | 1  | 0  | 0  | 3  |
| Piezo-type mechanosensitive ion channel component 1 OS=Homo sapiens GN=PIEZO1 PE=1 SV=4                                                               | PIEZ1_HUMAN (+1)       | 287 kDa | 0.89    | []                    | 0  | 1  | 0  | 0  | 2  | 0  |
| Plakophilin-2 OS=Homo sapiens GN=PKP2 PE=1 SV=1                                                                                                       | B8QGS9_HUMAN (+1)      | 91 kDa  | 0.05    | []                    | 0  | 0  | 0  | 4  | 1  | 3  |

|                                                                                                                              |                       |         |         |                       |    |    |    |    |    |    |
|------------------------------------------------------------------------------------------------------------------------------|-----------------------|---------|---------|-----------------------|----|----|----|----|----|----|
| Plakophilin-3 OS=Homo sapiens GN=PKP3 PE=1 SV=1                                                                              | PKP3_HUMAN            | 87 kDa  | 0.00056 | BRAC1 high, Naive low | 0  | 0  | 0  | 9  | 13 | 15 |
| Plakophilin-4 OS=Homo sapiens GN=PKP4 PE=1 SV=1                                                                              | A0A0D9SF60_HUMAN (+2) | 134 kDa | 0.0086  | BRAC1 high, Naive low | 0  | 0  | 0  | 10 | 6  | 7  |
| Plasma membrane citrate carrier OS=Homo sapiens GN=SLC25A1 PE=2 SV=1                                                         | D9HTE9_HUMAN (+2)     | 35 kDa  | 0.85    | []                    | 0  | 2  | 0  | 0  | 1  | 2  |
| Plasminogen activator inhibitor 1 RNA-binding protein OS=Homo sapiens GN=SERBP1 PE=1 SV=2                                    | PAIRB_HUMAN (+1)      | 45 kDa  | 0.96    | []                    | 1  | 1  | 6  | 0  | 1  | 12 |
| Plastin-1 OS=Homo sapiens GN=PLS1 PE=1 SV=2                                                                                  | PLS1_HUMAN            | 70 kDa  | 0.0048  | BRAC1 high, Naive low | 1  | 1  | 1  | 12 | 13 | 10 |
| Plastin-3 OS=Homo sapiens GN=PLS3 PE=1 SV=1                                                                                  | A0A0A0MSQ0_HUMAN (+3) | 69 kDa  | 0.14    | []                    | 2  | 4  | 3  | 3  | 3  | 4  |
| Platelet-activating factor acetylhydrolase IB subunit alpha OS=Homo sapiens GN=PFAFAH1B1 PE=1 SV=2                           | LIS1_HUMAN            | 47 kDa  | 0.59    | []                    | 0  | 1  | 2  | 1  | 1  | 1  |
| Platelet-activating factor acetylhydrolase IB subunit beta OS=Homo sapiens GN=PFAFAH1B2 PE=1 SV=1                            | PA1B2_HUMAN (+1)      | 26 kDa  | 0.028   | BRAC1 high, Naive low | 0  | 0  | 1  | 2  | 2  | 2  |
| Platelet-activating factor acetylhydrolase, isoform Ib, gamma subunit 29kDa, isoform CRA_a OS=Homo sapiens GN=PFAFAH1B3 PE=4 | A0A024R0L6_HUMAN (+1) | 26 kDa  | 0.1     | []                    | 0  | 0  | 0  | 2  | 1  | 7  |
| Platelet-derived growth factor receptor beta OS=Homo sapiens GN=PDGFRB PE=1 SV=1                                             | PGFRB_HUMAN           | 124 kDa | 0.007   | BRAC1 low, Naive high | 3  | 4  | 9  | 0  | 0  | 0  |
| Pleckstrin homology domain containing, family A member 5, isoform CRA_a OS=Homo sapiens GN=PLEKHA5 PE=4 SV=1                 | A0A024RAY7_HUMAN (+2) | 134 kDa | 0.033   | BRAC1 high, Naive low | 0  | 0  | 0  | 3  | 5  | 2  |
| Pleckstrin homology domain-containing family A member 6 OS=Homo sapiens GN=PLEKHA6 PE=1 SV=4                                 | PKHA6_HUMAN (+1)      | 117 kDa | 0.088   | []                    | 0  | 0  | 0  | 10 | 9  | 1  |
| Pleckstrin homology-like domain family A member 2 OS=Homo sapiens GN=PHLDA2 PE=1 SV=2                                        | PHLA2_HUMAN           | 17 kDa  | 0.37    | []                    | 0  | 0  | 0  | 2  | 0  | 0  |
| Pleckstrin homology-like domain family B member 2 OS=Homo sapiens GN=PHLDB2 PE=1 SV=2                                        | PHLB2_HUMAN (+5)      | 142 kDa | 0.37    | []                    | 0  | 0  | 2  | 0  | 0  | 0  |
| Plectin OS=Homo sapiens GN=PLEC PE=1 SV=3                                                                                    | PLEC_HUMAN            | 532 kDa | 0.05    | BRAC1 low, Naive high | 34 | 65 | 40 | 18 | 24 | 45 |
| Plexin-A1 OS=Homo sapiens GN=PLXNA1 PE=1 SV=3                                                                                | PLXA1_HUMAN           | 211 kDa | 0.001   | BRAC1 high, Naive low | 0  | 0  | 0  | 2  | 3  | 3  |
| Plexin-B1 OS=Homo sapiens GN=PLXNB1 PE=1 SV=3                                                                                | PLXB1_HUMAN           | 232 kDa | 0.16    | []                    | 0  | 0  | 0  | 2  | 4  | 0  |
| Plexin-B2 OS=Homo sapiens GN=PLXNB2 PE=1 SV=3                                                                                | PLXB2_HUMAN           | 205 kDa | 0.0084  | BRAC1 high, Naive low | 2  | 4  | 10 | 27 | 21 | 27 |
| Podocalyxin OS=Homo sapiens GN=PODXL PE=1 SV=2                                                                               | PODXL_HUMAN (+2)      | 59 kDa  | 0.12    | []                    | 0  | 0  | 0  | 0  | 2  | 2  |
| Poliovirus receptor OS=Homo sapiens GN=PVR PE=1 SV=1                                                                         | A0A0C4DG49_HUMAN (+3) | 45 kDa  | 0.23    | []                    | 0  | 1  | 1  | 1  | 2  | 4  |
| Poly [ADP-ribose] polymerase 1 OS=Homo sapiens GN=PARP1 PE=1 SV=4                                                            | PARP1_HUMAN (+3)      | 113 kDa | 0.17    | []                    | 0  | 0  | 0  | 0  | 1  | 2  |
| Poly [ADP-ribose] polymerase 14 OS=Homo sapiens GN=PARP14 PE=1 SV=3                                                          | PARP14_HUMAN          | 203 kDa | 0.095   | []                    | 0  | 0  | 1  | 5  | 5  | 1  |
| Poly(rC)-binding protein 1 OS=Homo sapiens GN=PCBP1 PE=1 SV=2                                                                | PCBP1_HUMAN (+1)      | 37 kDa  | 0.96    | []                    | 1  | 2  | 5  | 0  | 4  | 9  |
| Poly(rC)-binding protein 2 (Fragment) OS=Homo sapiens GN=PCBP2 PE=1 SV=2                                                     | F8VRH0_HUMAN          | 32 kDa  | 0.13    | []                    | 0  | 0  | 0  | 0  | 1  | 2  |
| Poly(rC)-binding protein 2 OS=Homo sapiens GN=PCBP2 PE=1 SV=1                                                                | PCBP2_HUMAN           | 39 kDa  | 0.75    | []                    | 1  | 2  | 3  | 1  | 2  | 6  |
| Polyadenylate-binding protein OS=Homo sapiens GN=PABPC1 PE=3 SV=1                                                            | A0A024R9C1_HUMAN (+3) | 71 kDa  | 0.74    | []                    | 3  | 3  | 6  | 4  | 5  | 10 |
| Polyadenylate-binding protein OS=Homo sapiens GN=PABPC4 PE=1 SV=1                                                            | B1ANR0_HUMAN (+2)     | 68 kDa  | 0.81    | []                    | 0  | 2  | 4  | 2  | 2  | 7  |
| Polymerase I and transcript release factor OS=Homo sapiens GN=PTRF PE=1 SV=1                                                 | PTRF_HUMAN            | 43 kDa  | 0.0041  | BRAC1 low, Naive high | 13 | 9  | 21 | 0  | 0  | 0  |
| Polypeptide N-acetylgalactosaminyltransferase 2 OS=Homo sapiens GN=GALNT2 PE=1 SV=1                                          | GALT2_HUMAN (+2)      | 65 kDa  | 0.39    | []                    | 0  | 3  | 1  | 0  | 1  | 1  |
| Polypeptide N-acetylgalactosaminyltransferase 3 OS=Homo sapiens GN=GALNT3 PE=1 SV=2                                          | GALT3_HUMAN (+1)      | 73 kDa  | 0.25    | []                    | 0  | 0  | 0  | 0  | 1  | 6  |
| Polypyrimidine tract binding protein 1, isoform CRA_b OS=Homo sapiens GN=PTBP1 PE=1 SV=4                                     | A6NLN1_HUMAN (+1)     | 57 kDa  | 0.85    | []                    | 1  | 4  | 7  | 2  | 2  | 14 |
| Polypyrimidine tract-binding protein 3 OS=Homo sapiens GN=PTBP3 PE=1 SV=2                                                    | PTBP3_HUMAN (+1)      | 60 kDa  | 0.37    | []                    | 0  | 0  | 0  | 0  | 0  | 3  |
| Pre-B-cell colony enhancing factor 1, isoform CRA_a OS=Homo sapiens GN=PBEF1 PE=4 SV=1                                       | A0A024R718_HUMAN (+1) | 56 kDa  | 0.31    | []                    | 0  | 0  | 0  | 1  | 0  | 12 |
| Pre-mRNA-processing-splicing factor 8 OS=Homo sapiens GN=PRPF8 PE=1 SV=2                                                     | PRP8_HUMAN            | 274 kDa | 0.37    | []                    | 0  | 0  | 0  | 0  | 0  | 4  |
| Pre-mRNA-splicing factor ATP-dependent RNA helicase DHX15 OS=Homo sapiens GN=DHX15 PE=1 SV=2                                 | DHX15_HUMAN           | 91 kDa  | 0.37    | []                    | 0  | 0  | 0  | 0  | 0  | 4  |
| Lamin A/C OS=Homo sapiens GN=LMNA PE=3 SV=1                                                                                  | W8QEH3_HUMAN          | 65 kDa  | 0.016   | BRAC1 low, Naive high | 12 | 24 | 38 | 4  | 2  | 18 |
| Prelamin-A/C OS=Homo sapiens GN=LMNA PE=1 SV=1                                                                               | LMNA_HUMAN            | 74 kDa  | 0.0061  | BRAC1 low, Naive high | 16 | 27 | 41 | 5  | 2  | 20 |
| Presenilin OS=Homo sapiens GN=PSEN1 PE=3 SV=1                                                                                | A0A024R6A3_HUMAN (+3) | 53 kDa  | 0.16    | []                    | 0  | 0  | 0  | 1  | 2  | 0  |
| Probable ATP-dependent RNA helicase DDX5 OS=Homo sapiens GN=DDX5 PE=1 SV=1                                                   | DDX5_HUMAN (+3)       | 69 kDa  | 0.54    | []                    | 0  | 0  | 2  | 0  | 1  | 6  |
| Probable ATP-dependent RNA helicase DDX17 OS=Homo sapiens GN=DDX17 PE=1 SV=2                                                 | DDX17_HUMAN (+2)      | 80 kDa  | 0.76    | []                    | 1  | 1  | 3  | 0  | 3  | 4  |
| Procollagen galactosyltransferase 1 OS=Homo sapiens GN=COLGALT1 PE=1 SV=1                                                    | GT251_HUMAN           | 72 kDa  | 0.15    | []                    | 1  | 3  | 1  | 0  | 0  | 2  |
| Procollagen-lysine,2-oxoglutarate 5-dioxygenase 1 OS=Homo sapiens GN=PLOD1 PE=1 SV=2                                         | PLOD1_HUMAN (+2)      | 84 kDa  | 0.0041  | BRAC1 low, Naive high | 5  | 5  | 5  | 0  | 0  | 2  |
| Procollagen-lysine,2-oxoglutarate 5-dioxygenase 2 OS=Homo sapiens GN=PLOD2 PE=1 SV=2                                         | PLOD2_HUMAN           | 85 kDa  | 0.3     | []                    | 5  | 7  | 2  | 1  | 1  | 11 |
| Procollagen-lysine,2-oxoglutarate 5-dioxygenase 3 OS=Homo sapiens GN=PLOD3 PE=1 SV=1                                         | PLOD3_HUMAN           | 85 kDa  | 0.62    | []                    | 3  | 3  | 1  | 3  | 3  | 14 |
| Profilin-1 OS=Homo sapiens GN=PFN1 PE=1 SV=2                                                                                 | PROF1_HUMAN           | 15 kDa  | 0.69    | []                    | 4  | 8  | 4  | 10 | 8  | 5  |
| Programmed cell death 1 ligand 2 OS=Homo sapiens GN=PDCC1LG2 PE=1 SV=2                                                       | PD1L2_HUMAN (+2)      | 31 kDa  | 0.37    | []                    | 0  | 0  | 2  | 0  | 0  | 0  |
| Programmed cell death 6-interacting protein OS=Homo sapiens GN=PDCC6IP PE=1 SV=1                                             | PDCC6_HUMAN           | 96 kDa  | 0.008   | BRAC1 high, Naive low | 2  | 2  | 6  | 11 | 13 | 14 |
| Programmed cell death protein 4 OS=Homo sapiens GN=PDCC4 PE=1 SV=2                                                           | PDCC4_HUMAN (+2)      | 52 kDa  | 0.37    | []                    | 0  | 0  | 0  | 0  | 0  | 5  |
| Programmed cell death protein 6 OS=Homo sapiens GN=PDCC6 PE=1 SV=1                                                           | PDCC6_HUMAN (+1)      | 22 kDa  | 0.098   | []                    | 1  | 2  | 2  | 6  | 8  | 4  |
| Prohibitin, isoform CRA_a OS=Homo sapiens GN=PHB PE=2 SV=1                                                                   | A8K401_HUMAN (+1)     | 30 kDa  | 0.14    | []                    | 5  | 4  | 10 | 6  | 4  | 10 |
| Prohibitin-2 OS=Homo sapiens GN=PHB2 PE=1 SV=2                                                                               | J3KPX7_HUMAN (+1)     | 33 kDa  | 0.35    | []                    | 4  | 6  | 6  | 3  | 9  | 9  |
| Prolactin regulatory element-binding protein OS=Homo sapiens GN=PREB PE=1 SV=2                                               | PREB_HUMAN (+2)       | 45 kDa  | 0.37    | []                    | 0  | 0  | 0  | 0  | 0  | 2  |
| Proliferating cell nuclear antigen OS=Homo sapiens GN=PCNA PE=1 SV=1                                                         | PCNA_HUMAN (+2)       | 29 kDa  | 0.0027  | BRAC1 high, Naive low | 0  | 0  | 0  | 1  | 1  | 2  |
| Proliferation-associated 2G4, 38kDa, isoform CRA_a OS=Homo sapiens GN=PA2G4 PE=4 SV=1                                        | A0A024RB85_HUMAN (+3) | 44 kDa  | 0.32    | []                    | 0  | 1  | 1  | 0  | 3  | 11 |
| Prolow-density lipoprotein receptor-related protein 1 OS=Homo sapiens GN=LRP1 PE=1 SV=2                                      | LRP1_HUMAN            | 505 kDa | 0.21    | []                    | 1  | 7  | 1  | 0  | 0  | 0  |
| Prolyl 3-hydroxylase 1 OS=Homo sapiens GN=P3H1 PE=1 SV=2                                                                     | P3H1_HUMAN (+1)       | 83 kDa  | 0.013   | BRAC1 low, Naive high | 1  | 3  | 3  | 0  | 0  | 0  |
| Prolyl 3-hydroxylase 3 OS=Homo sapiens GN=P3H3 PE=1 SV=1                                                                     | P3H3_HUMAN (+1)       | 82 kDa  | 0.19    | []                    | 0  | 2  | 1  | 0  | 0  | 0  |
| Prolyl 4-hydroxylase subunit alpha-1 OS=Homo sapiens GN=P4HA1 PE=1 SV=2                                                      | P4HA1_HUMAN           | 61 kDa  | 0.45    | []                    | 4  | 5  | 9  | 0  | 2  | 18 |
| Prolyl 4-hydroxylase subunit alpha-2 OS=Homo sapiens GN=P4HA2 PE=1 SV=1                                                      | P4HA2_HUMAN (+1)      | 61 kDa  | 0.28    | []                    | 2  | 6  | 8  | 0  | 1  | 12 |
| Prolyl endopeptidase FAP OS=Homo sapiens GN=FAP PE=1 SV=5                                                                    | SEPR_HUMAN (+1)       | 88 kDa  | 0.1     | []                    | 1  | 2  | 8  | 0  | 0  | 0  |
| Prominin 2, isoform CRA_a OS=Homo sapiens GN=PROM2 PE=4 SV=1                                                                 | A0A024RE18_HUMAN (+2) | 92 kDa  | 0.028   | BRAC1 high, Naive low | 0  | 0  | 0  | 1  | 2  | 1  |
| Prosaposin OS=Homo sapiens GN=PSAP PE=1 SV=2                                                                                 | SAP_HUMAN (+6)        | 58 kDa  | 0.37    | []                    | 0  | 0  | 0  | 0  | 0  | 4  |

|                                                                                                                |                       |         |        |                       |    |    |    |    |    |    |
|----------------------------------------------------------------------------------------------------------------|-----------------------|---------|--------|-----------------------|----|----|----|----|----|----|
| Prostacyclin synthase OS=Homo sapiens GN=PTGIS PE=1 SV=1                                                       | PTGIS_HUMAN (+2)      | 57 kDa  | 0.0019 | BRAC1 low, Naive high | 5  | 4  | 6  | 0  | 0  | 0  |
| Prostaglandin E synthase 2 OS=Homo sapiens GN=PTGES2 PE=1 SV=1                                                 | PTGES2_HUMAN          | 42 kDa  | 0.028  | BRAC1 high, Naive low | 0  | 0  | 0  | 2  | 1  | 4  |
| Prostaglandin E synthase 3 (Cytosolic), isoform CRA_a OS=Homo sapiens GN=PTGES3 PE=4 SV=1                      | A0A024RB32_HUMAN (+3) | 19 kDa  | 0.13   | []                    | 0  | 0  | 0  | 1  | 0  | 2  |
| Prostaglandin G/H synthase 1 OS=Homo sapiens GN=PTGS1 PE=1 SV=2                                                | PGH1_HUMAN (+1)       | 69 kDa  | 0.16   | []                    | 1  | 2  | 5  | 0  | 0  | 4  |
| Prostasin OS=Homo sapiens GN=PRSS8 PE=1 SV=1                                                                   | PRSS8_HUMAN           | 36 kDa  | 0.23   | []                    | 0  | 0  | 0  | 0  | 1  | 5  |
| Proteasomal ubiquitin receptor ADRM1 OS=Homo sapiens GN=ADRM1 PE=1 SV=2                                        | ADRM1_HUMAN (+2)      | 42 kDa  | 0.87   | []                    | 0  | 0  | 1  | 0  | 0  | 2  |
| Proteasome (Prosome, macropain) subunit, beta type, 2, isoform CRA_b OS=Homo sapiens GN=PSMB2 PE=2 SV=1        | B7Z478_HUMAN (+1)     | 20 kDa  | 0.018  | BRAC1 high, Naive low | 0  | 0  | 0  | 2  | 2  | 1  |
| Proteasome activator complex subunit 2 OS=Homo sapiens GN=PSME2 PE=1 SV=1                                      | A0A087X1Z3_HUMAN (+4) | 29 kDa  | 0.35   | []                    | 0  | 0  | 5  | 2  | 6  | 7  |
| Proteasome subunit alpha type-1 OS=Homo sapiens GN=PSMA1 PE=1 SV=1                                             | PSA1_HUMAN            | 30 kDa  | 0.6    | []                    | 1  | 1  | 4  | 2  | 3  | 2  |
| Proteasome subunit alpha type-2 OS=Homo sapiens GN=PSMA2 PE=1 SV=2                                             | PSA2_HUMAN (+2)       | 26 kDa  | 0.87   | []                    | 0  | 0  | 2  | 0  | 0  | 4  |
| Proteasome subunit alpha type-5 OS=Homo sapiens GN=PSMA5 PE=1 SV=3                                             | PSA5_HUMAN (+1)       | 26 kDa  | 0.82   | []                    | 0  | 0  | 2  | 1  | 0  | 1  |
| Proteasome-associated protein ECM29 homolog OS=Homo sapiens GN=ECM29 PE=1 SV=2                                 | ECM29_HUMAN (+2)      | 204 kDa | 0.37   | []                    | 0  | 0  | 0  | 0  | 0  | 4  |
| Protein 4.1 OS=Homo sapiens GN=EPB41 PE=1 SV=4                                                                 | 41_HUMAN (+4)         | 97 kDa  | 0.021  | BRAC1 high, Naive low | 0  | 0  | 0  | 8  | 5  | 4  |
| Protein ARPC4-TTL3 OS=Homo sapiens GN=ARPC4-TLL3 PE=4 SV=1                                                     | A0A0A6YYG9_HUMAN (+3) | 72 kDa  | 0.99   | []                    | 2  | 1  | 1  | 3  | 3  | 1  |
| Protein FAM83H OS=Homo sapiens GN=FAM83H PE=1 SV=3                                                             | FA83H_HUMAN (+1)      | 127 kDa | 0.37   | []                    | 0  | 0  | 0  | 0  | 0  | 3  |
| Protein FAM91A1 OS=Homo sapiens GN=FAM91A1 PE=1 SV=3                                                           | F91A1_HUMAN           | 94 kDa  | 0.0027 | BRAC1 high, Naive low | 0  | 0  | 0  | 1  | 1  | 2  |
| Protein FAM98A OS=Homo sapiens GN=FAM98A PE=1 SV=1                                                             | FA98A_HUMAN (+2)      | 55 kDa  | 0.87   | []                    | 0  | 0  | 1  | 0  | 0  | 2  |
| Protein GPR107 OS=Homo sapiens GN=GPR107 PE=1 SV=1                                                             | GP107_HUMAN (+1)      | 67 kDa  | 0.37   | []                    | 0  | 0  | 0  | 0  | 0  | 2  |
| Protein LAP2 OS=Homo sapiens GN=ERBB2IP PE=1 SV=2                                                              | LAP2_HUMAN (+1)       | 158 kDa | 0.13   | []                    | 0  | 3  | 1  | 7  | 10 | 4  |
| Protein LYRIC OS=Homo sapiens GN=MTDH PE=1 SV=2                                                                | LYRIC_HUMAN (+1)      | 64 kDa  | 0.92   | []                    | 0  | 3  | 0  | 0  | 2  | 3  |
| Protein PML OS=Homo sapiens GN=PML PE=1 SV=3                                                                   | PML_HUMAN (+1)        | 98 kDa  | 0.37   | []                    | 0  | 0  | 2  | 0  | 0  | 0  |
| Protein POF1B OS=Homo sapiens GN=POF1B PE=1 SV=3                                                               | POF1B_HUMAN           | 68 kDa  | 0.16   | []                    | 0  | 0  | 0  | 1  | 2  | 10 |
| Protein RER1 (Fragment) OS=Homo sapiens GN=RER1 PE=1 SV=1                                                      | A0A0A0MR06_HUMAN (+7) | 21 kDa  | 0.36   | []                    | 0  | 1  | 1  | 2  | 2  | 1  |
| Protein S100-A4 OS=Homo sapiens GN=S100A4 PE=1 SV=1                                                            | S10A4_HUMAN           | 12 kDa  | 0.37   | []                    | 0  | 0  | 0  | 2  | 0  | 0  |
| Protein S100-A11 OS=Homo sapiens GN=S100A11 PE=1 SV=2                                                          | S10AB_HUMAN (+1)      | 12 kDa  | 0.014  | BRAC1 low, Naive high | 4  | 4  | 4  | 1  | 3  | 2  |
| Protein S100-A14 OS=Homo sapiens GN=S100A14 PE=1 SV=1                                                          | S10AE_HUMAN           | 12 kDa  | 0.2    | []                    | 0  | 0  | 0  | 1  | 3  | 0  |
| Protein S100-A16 OS=Homo sapiens GN=S100A16 PE=1 SV=1                                                          | S10AG_HUMAN           | 12 kDa  | 0.16   | []                    | 0  | 0  | 0  | 1  | 2  | 0  |
| Protein S100-P OS=Homo sapiens GN=S100P PE=1 SV=2                                                              | S10OP_HUMAN           | 10 kDa  | 0.13   | []                    | 0  | 0  | 0  | 3  | 2  | 0  |
| Protein SEC13 homolog OS=Homo sapiens GN=SEC13 PE=1 SV=1                                                       | A0A0C4DFR6_HUMAN (+3) | 36 kDa  | 0.92   | []                    | 0  | 0  | 3  | 1  | 0  | 4  |
| Protein Shroom1 OS=Homo sapiens GN=SHROOM1 PE=1 SV=1                                                           | SHRM1_HUMAN (+1)      | 91 kDa  | 0.37   | []                    | 0  | 0  | 0  | 0  | 0  | 2  |
| Protein TSSC1 OS=Homo sapiens GN=TSSC1 PE=1 SV=2                                                               | TSSC1_HUMAN (+1)      | 44 kDa  | 0.37   | []                    | 0  | 0  | 0  | 0  | 0  | 2  |
| Protein Wnt OS=Homo sapiens PE=2 SV=1                                                                          | Q5U0K5_HUMAN (+1)     | 39 kDa  | 0.16   | []                    | 0  | 0  | 0  | 1  | 2  | 0  |
| Protein XRP2 OS=Homo sapiens GN=RP2 PE=1 SV=4                                                                  | XRP2_HUMAN (+1)       | 40 kDa  | 0.87   | []                    | 0  | 0  | 1  | 0  | 0  | 2  |
| Protein arginine N-methyltransferase 1 OS=Homo sapiens GN=PRMT1 PE=1 SV=2                                      | ANM1_HUMAN (+3)       | 42 kDa  | 0.45   | []                    | 0  | 0  | 2  | 1  | 2  | 2  |
| Protein deglycase DJ-1 OS=Homo sapiens GN=PARK7 PE=1 SV=2                                                      | PARK7_HUMAN (+1)      | 20 kDa  | 0.15   | []                    | 0  | 0  | 2  | 2  | 2  | 4  |
| Protein diaphanous homolog 1 OS=Homo sapiens GN=DIAPH1 PE=1 SV=1                                               | A0A0G2JH68_HUMAN (+2) | 141 kDa | 0.28   | []                    | 0  | 0  | 0  | 1  | 0  | 8  |
| Protein disulfide-isomerase A4 OS=Homo sapiens GN=ERP70 PE=3 SV=1                                              | A0A090N8Y2_HUMAN (+1) | 73 kDa  | 0.061  | []                    | 4  | 5  | 7  | 15 | 17 | 41 |
| Protein disulfide-isomerase A5 OS=Homo sapiens GN=PDI A5 PE=1 SV=1                                             | PDI A5_HUMAN          | 60 kDa  | 0.37   | []                    | 0  | 0  | 0  | 0  | 0  | 4  |
| Protein disulfide-isomerase A6 OS=Homo sapiens GN=PDI A6 PE=1 SV=1                                             | PDI A6_HUMAN          | 48 kDa  | 0.68   | []                    | 23 | 25 | 18 | 34 | 29 | 45 |
| Protein disulfide-isomerase OS=Homo sapiens GN=P4HB PE=1 SV=2                                                  | H7BZ94_HUMAN          | 53 kDa  | 0.058  | []                    | 26 | 28 | 24 | 16 | 20 | 37 |
| cDNA FLJ56766, highly similar to Protein disulfide-isomerase (EC5.3.4.1) OS=Homo sapiens PE=2 SV=1             | B4DJS0_HUMAN          | 27 kDa  | 0.27   | []                    | 21 | 24 | 16 | 17 | 26 | 35 |
| Protein disulfide-isomerase A3 (Fragment) OS=Homo sapiens GN=PDI A3 PE=1 SV=1                                  | H7BZ13_HUMAN          | 14 kDa  | 0.15   | []                    | 14 | 14 | 7  | 0  | 13 | 12 |
| Protein disulfide-isomerase OS=Homo sapiens PE=2 SV=1                                                          | B3KQT9_HUMAN (+2)     | 54 kDa  | 0.38   | []                    | 47 | 48 | 35 | 50 | 58 | 77 |
| Protein disulfide-isomerase TMX3 OS=Homo sapiens GN=TMX3 PE=1 SV=2                                             | TMX3_HUMAN            | 52 kDa  | 0.45   | []                    | 0  | 0  | 4  | 0  | 0  | 1  |
| Protein eva-1 homolog B OS=Homo sapiens GN=EVA1B PE=1 SV=1                                                     | EVA1B_HUMAN           | 18 kDa  | 0.12   | []                    | 0  | 2  | 2  | 0  | 0  | 0  |
| Protein kinase C OS=Homo sapiens PE=1 SV=1                                                                     | B2RCZ4_HUMAN (+2)     | 67 kDa  | 0.13   | []                    | 0  | 0  | 0  | 1  | 0  | 2  |
| Protein kinase C alpha type OS=Homo sapiens GN=PRKCA PE=1 SV=4                                                 | KPCA_HUMAN (+3)       | 77 kDa  | 0.19   | []                    | 0  | 2  | 1  | 0  | 0  | 0  |
| Protein kinase C and casein kinase substrate in neurons 2, isoform CRA_a OS=Homo sapiens GN=PAC SIN2 PE=4 SV=1 | A0A024R4X1_HUMAN (+2) | 50 kDa  | 0.11   | []                    | 0  | 0  | 1  | 2  | 2  | 1  |
| Protein kinase C delta type OS=Homo sapiens GN=PRKCD PE=1 SV=2                                                 | KPCD_HUMAN (+2)       | 78 kDa  | 0.13   | []                    | 0  | 0  | 0  | 0  | 1  | 2  |
| Protein kinase C delta-binding protein OS=Homo sapiens GN=PRK CDBP PE=1 SV=3                                   | PRDBP_HUMAN           | 28 kDa  | 0.0001 | BRAC1 low, Naive high | 5  | 5  | 8  | 0  | 0  | 0  |
| Protein kinase C substrate 80K-H, isoform CRA_a OS=Homo sapiens GN=PRKCSH PE=4 SV=1                            | A0A024R7F1_HUMAN (+2) | 59 kDa  | 0.39   | []                    | 2  | 2  | 3  | 2  | 1  | 6  |
| Protein kinase, cAMP-dependent, regulatory, type II, alpha, isoform CRA_a OS=Homo sapiens GN=PRKAR2A PE=4 SV=1 | A0A024R2W3_HUMAN (+2) | 46 kDa  | 0.13   | []                    | 0  | 0  | 0  | 2  | 0  | 4  |
| Protein lin-7 homolog C OS=Homo sapiens GN=LIN7C PE=1 SV=1                                                     | LIN7C_HUMAN (+1)      | 22 kDa  | 0.12   | []                    | 0  | 0  | 0  | 3  | 3  | 0  |
| Protein lunapark OS=Homo sapiens GN=LNP PE=1 SV=2                                                              | LNP_HUMAN (+3)        | 48 kDa  | 0.25   | []                    | 2  | 3  | 0  | 0  | 1  | 2  |
| Protein pelota homolog OS=Homo sapiens GN=PELO PE=1 SV=2                                                       | PELO_HUMAN (+2)       | 43 kDa  | 0.69   | []                    | 0  | 0  | 1  | 0  | 0  | 3  |
| Protein phosphatase 1 regulatory subunit 12A OS=Homo sapiens GN=PPP1R12A PE=1 SV=1                             | MYPT1_HUMAN (+1)      | 115 kDa | 0.0022 | BRAC1 low, Naive high | 2  | 3  | 4  | 0  | 0  | 2  |
| Protein scribble homolog OS=Homo sapiens GN=SCRIB PE=1 SV=1                                                    | A0A0G2JNZ2_HUMAN (+1) | 175 kDa | 0.0075 | BRAC1 high, Naive low | 0  | 1  | 1  | 35 | 38 | 25 |
| Protein sel-1 homolog 1 OS=Homo sapiens GN=SEL1L PE=1 SV=3                                                     | SE11L_HUMAN           | 89 kDa  | 0.31   | []                    | 0  | 2  | 3  | 0  | 1  | 2  |
| Protein translocation complex beta variant (Fragment) OS=Homo sapiens PE=2 SV=1                                | Q53FA5_HUMAN (+1)     | 10 kDa  | 0.26   | []                    | 0  | 1  | 0  | 1  | 1  | 3  |
| Protein transport protein Sec16A OS=Homo sapiens GN=SEC16A PE=1 SV=3                                           | SC16A_HUMAN (+4)      | 234 kDa | 0.37   | []                    | 0  | 0  | 0  | 0  | 0  | 4  |
| Protein transport protein Sec23A OS=Homo sapiens GN=SEC23A PE=1 SV=2                                           | SC23A_HUMAN           | 86 kDa  | 0.15   | []                    | 5  | 3  | 9  | 1  | 2  | 10 |
| Protein transport protein Sec24A OS=Homo sapiens GN=SEC24A PE=1 SV=2                                           | SC24A_HUMAN (+1)      | 120 kDa | 0.21   | []                    | 0  | 0  | 0  | 0  | 1  | 4  |

|                                                                                                                                |                       |         |         |                       |    |    |    |    |    |    |
|--------------------------------------------------------------------------------------------------------------------------------|-----------------------|---------|---------|-----------------------|----|----|----|----|----|----|
| Protein transport protein Sec24B OS=Homo sapiens GN=SEC24B PE=1 SV=2                                                           | SC24B_HUMAN           | 137 kDa | 0.7     | []                    | 0  | 1  | 0  | 0  | 0  | 4  |
| Protein transport protein Sec24D OS=Homo sapiens GN=SEC24D PE=1 SV=2                                                           | SC24D_HUMAN (+5)      | 113 kDa | 0.87    | []                    | 0  | 0  | 1  | 0  | 0  | 2  |
| Protein tweety homolog OS=Homo sapiens GN=TTYH3 PE=3 SV=1                                                                      | A0A024R816_HUMAN (+1) | 58 kDa  | 0.55    | []                    | 0  | 2  | 0  | 1  | 0  | 0  |
| Protein unc-45 homolog A OS=Homo sapiens GN=UNC45A PE=1 SV=1                                                                   | UN45A_HUMAN           | 103 kDa | 0.056   | []                    | 0  | 0  | 0  | 4  | 1  | 7  |
| Protein-glutamine gamma-glutamyltransferase 2 OS=Homo sapiens GN=TGM2 PE=1 SV=2                                                | TGM2_HUMAN (+1)       | 77 kDa  | 0.66    | []                    | 9  | 7  | 12 | 5  | 7  | 30 |
| Protein-methionine sulfoxide oxidase MICAL1 OS=Homo sapiens GN=MICAL1 PE=1 SV=2                                                | MICA1_HUMAN (+1)      | 118 kDa | 0.37    | []                    | 0  | 0  | 0  | 0  | 0  | 2  |
| Protein-methionine sulfoxide oxidase MICAL2 OS=Homo sapiens GN=MICAL2 PE=1 SV=1                                                | MICA2_HUMAN           | 127 kDa | 0.37    | []                    | 0  | 0  | 0  | 0  | 0  | 2  |
| Protein-tyrosine-phosphatase OS=Homo sapiens GN=PTPRK PE=2 SV=1                                                                | Q86WJ2_HUMAN          | 162 kDa | 0.093   | []                    | 0  | 0  | 1  | 5  | 9  | 2  |
| Proto-oncogene tyrosine-protein kinase Src OS=Homo sapiens GN=SRC PE=1 SV=3                                                    | SRC_HUMAN             | 60 kDa  | 0.0029  | BRAC1 high, Naive low | 0  | 1  | 1  | 8  | 12 | 11 |
| Putative helicase MOV-10 OS=Homo sapiens GN=MOV10 PE=1 SV=2                                                                    | MOV10_HUMAN (+2)      | 114 kDa | 0.5     | []                    | 0  | 2  | 0  | 0  | 0  | 1  |
| Putative uncharacterized protein DKFZp547A0616 (Fragment) OS=Homo sapiens GN=DKFZp547A0616 PE=2 SV=1                           | Q5JQ44_HUMAN (+1)     | 20 kDa  | 0.2     | []                    | 0  | 0  | 1  | 2  | 1  | 1  |
| Putative uncharacterized protein DKFZp686E1899 OS=Homo sapiens GN=DKFZp686E1899 PE=2 SV=1                                      | Q5HYL6_HUMAN (+1)     | 40 kDa  | 0.14    | []                    | 3  | 1  | 1  | 6  | 6  | 7  |
| Putative uncharacterized protein DKFZp686F17268 (Fragment) OS=Homo sapiens GN=DKFZp686F17268 PE=2 SV=1                         | A4GY8_HUMAN (+7)      | 50 kDa  | 0.054   | []                    | 9  | 9  | 12 | 12 | 12 | 10 |
| Pyridoxal kinase OS=Homo sapiens GN=PDXX PE=1 SV=1                                                                             | PDXK_HUMAN (+1)       | 35 kDa  | 0.27    | []                    | 0  | 0  | 1  | 0  | 2  | 7  |
| Pyridoxal-dependent decarboxylase domain-containing protein 1 OS=Homo sapiens GN=PDXDC1 PE=1 SV=2                              | PDXD1_HUMAN (+2)      | 87 kDa  | 0.37    | []                    | 0  | 0  | 0  | 0  | 0  | 10 |
| Pyroline-5-carboxylate reductase 1, mitochondrial OS=Homo sapiens GN=PYCR1 PE=1 SV=2                                           | P5CR1_HUMAN (+7)      | 33 kDa  | 0.63    | []                    | 0  | 0  | 3  | 0  | 0  | 2  |
| Pyruvate dehydrogenase E1 component subunit beta, mitochondrial OS=Homo sapiens GN=PDHB PE=1 SV=3                              | ODPB_HUMAN            | 39 kDa  | 0.34    | []                    | 1  | 0  | 2  | 1  | 0  | 1  |
| Pyruvate kinase OS=Homo sapiens GN=PKM2 PE=3 SV=1                                                                              | A0A024R529_HUMAN      | 58 kDa  | 0.22    | []                    | 29 | 33 | 42 | 48 | 53 | 44 |
| Pyruvate kinase OS=Homo sapiens PE=2 SV=1                                                                                      | B4DPMO_HUMAN (+3)     | 53 kDa  | 0.37    | []                    | 0  | 0  | 0  | 0  | 1  | 0  |
| Pyruvate kinase PKM OS=Homo sapiens GN=PKM PE=1 SV=4                                                                           | KPYM_HUMAN (+1)       | 58 kDa  | 0.27    | []                    | 35 | 39 | 47 | 55 | 64 | 54 |
| Quinone oxidoreductase OS=Homo sapiens GN=CRYZ PE=1 SV=1                                                                       | QOR_HUMAN             | 35 kDa  | 0.42    | []                    | 0  | 1  | 3  | 2  | 2  | 7  |
| RAB2, member RAS oncogene family, isoform CRA_a OS=Homo sapiens GN=RAB2 PE=3 SV=1                                              | A0A024R7V6_HUMAN (+1) | 24 kDa  | 0.66    | []                    | 3  | 2  | 1  | 5  | 3  | 6  |
| RAB5A, member RAS oncogene family, isoform CRA_a OS=Homo sapiens GN=RAB5A PE=3 SV=1                                            | A0A024R2K1_HUMAN (+1) | 24 kDa  | 0.82    | []                    | 1  | 1  | 2  | 3  | 0  | 3  |
| RAB5B, member RAS oncogene family, isoform CRA_a OS=Homo sapiens GN=RAB5B PE=3 SV=1                                            | A0A024RB09_HUMAN (+1) | 24 kDa  | 0.6     | []                    | 3  | 2  | 0  | 1  | 2  | 4  |
| RAB5C, member RAS oncogene family, isoform CRA_a OS=Homo sapiens GN=RAB5C PE=3 SV=1                                            | A0A024R1U4_HUMAN (+1) | 23 kDa  | 0.13    | []                    | 6  | 4  | 8  | 4  | 8  | 6  |
| RAB6A, member RAS oncogene family, isoform CRA_b OS=Homo sapiens GN=RAB6A PE=3 SV=1                                            | A0A024R5H8_HUMAN (+2) | 24 kDa  | 0.35    | []                    | 1  | 1  | 1  | 5  | 3  | 1  |
| RAB11A, member RAS oncogene family, isoform CRA_a OS=Homo sapiens GN=RAB11A PE=3 SV=1                                          | A0A024R5Z8_HUMAN (+1) | 24 kDa  | 0.46    | []                    | 6  | 3  | 3  | 4  | 7  | 3  |
| Ras-related protein Rab-11B OS=Homo sapiens GN=RAB11B PE=1 SV=4                                                                | RB11B_HUMAN           | 24 kDa  | 0.57    | []                    | 5  | 2  | 2  | 3  | 6  | 2  |
| RAB14, member RAS oncogene family, isoform CRA_a OS=Homo sapiens GN=RAB14 PE=3 SV=1                                            | A0A024R845_HUMAN (+1) | 24 kDa  | 0.18    | []                    | 3  | 2  | 5  | 8  | 8  | 7  |
| RAB21, member RAS oncogene family, isoform CRA_a OS=Homo sapiens GN=RAB21 PE=3 SV=1                                            | A0A024RBA9_HUMAN (+1) | 24 kDa  | 0.49    | []                    | 1  | 2  | 1  | 3  | 4  | 2  |
| RAN binding protein 5, isoform CRA_d OS=Homo sapiens GN=RANBP5 PE=4 SV=1                                                       | A0A024RDY0_HUMAN (+1) | 124 kDa | 0.31    | []                    | 1  | 3  | 8  | 10 | 11 | 6  |
| Ran-binding protein 6 OS=Homo sapiens GN=RANBP6 PE=1 SV=2                                                                      | RNBP6_HUMAN           | 125 kDa | 0.37    | []                    | 0  | 0  | 0  | 0  | 0  | 1  |
| RAP1A, member of RAS oncogene family OS=Homo sapiens GN=RAP1A PE=2 SV=1                                                        | A8KAH9_HUMAN (+1)     | 21 kDa  | 0.74    | []                    | 9  | 8  | 4  | 22 | 17 | 5  |
| RAP1B, member of RAS oncogene family, isoform CRA_a OS=Homo sapiens GN=RAP1B PE=4 SV=1                                         | A0A024RB87_HUMAN (+1) | 21 kDa  | 0.79    | []                    | 10 | 8  | 5  | 22 | 18 | 6  |
| RNA-binding motif protein, X chromosome OS=Homo sapiens GN=RBMX PE=1 SV=3                                                      | RBMX_HUMAN            | 42 kDa  | 0.21    | []                    | 1  | 0  | 3  | 0  | 0  | 1  |
| RNA-binding protein 39 OS=Homo sapiens GN=RBM39 PE=1 SV=2                                                                      | RBM39_HUMAN (+10)     | 59 kDa  | 0.13    | []                    | 0  | 0  | 0  | 0  | 1  | 2  |
| RNA-binding protein 47 OS=Homo sapiens GN=RBM47 PE=1 SV=2                                                                      | RBM47_HUMAN (+3)      | 64 kDa  | 0.13    | []                    | 0  | 0  | 0  | 0  | 1  | 2  |
| RNA-binding protein EWS OS=Homo sapiens GN=EWSR1 PE=1 SV=1                                                                     | A0A0095FL3_HUMAN (+4) | 61 kDa  | 0.0027  | BRAC1 high, Naive low | 0  | 0  | 0  | 1  | 1  | 2  |
| RPLP1 protein OS=Homo sapiens GN=RPLP1 PE=2 SV=1                                                                               | Q6FG99_HUMAN          | 12 kDa  | 0.37    | []                    | 0  | 0  | 0  | 2  | 0  | 0  |
| RSU1 protein (Fragment) OS=Homo sapiens GN=RSU1 PE=2 SV=1                                                                      | Q32Q10_HUMAN (+1)     | 31 kDa  | 0.83    | []                    | 0  | 1  | 2  | 2  | 1  | 2  |
| Rab3 GTPase-activating protein non-catalytic subunit OS=Homo sapiens GN=RAB3GAP2 PE=1 SV=1                                     | RBGPR_HUMAN (+1)      | 156 kDa | 0.37    | []                    | 0  | 0  | 0  | 0  | 0  | 2  |
| Rac GTPase activating protein 1, isoform CRA_a OS=Homo sapiens GN=RACGAP1 PE=4 SV=1                                            | A0A024R136_HUMAN (+2) | 71 kDa  | 0.017   | BRAC1 high, Naive low | 0  | 1  | 1  | 6  | 8  | 5  |
| Raftlin OS=Homo sapiens GN=RFTN1 PE=1 SV=4                                                                                     | RFTN1_HUMAN (+1)      | 63 kDa  | 0.041   | BRAC1 low, Naive high | 1  | 5  | 7  | 0  | 0  | 0  |
| Regulator complex protein LAMTOR1 OS=Homo sapiens GN=LAMTOR1 PE=1 SV=2                                                         | LTOR1_HUMAN           | 18 kDa  | 0.71    | []                    | 2  | 1  | 0  | 2  | 2  | 0  |
| Ran GTPase-activating protein 1 OS=Homo sapiens GN=RANGAP1 PE=1 SV=1                                                           | RAGP1_HUMAN (+2)      | 64 kDa  | 0.37    | []                    | 0  | 0  | 0  | 0  | 0  | 3  |
| Ran-specific GTPase-activating protein OS=Homo sapiens GN=RANBP1 PE=1 SV=1                                                     | RANG_HUMAN            | 23 kDa  | 0.37    | []                    | 0  | 0  | 0  | 0  | 0  | 3  |
| Ras GTPase-activating protein 3 OS=Homo sapiens GN=RASA3 PE=1 SV=3                                                             | RASA3_HUMAN           | 96 kDa  | 0.16    | []                    | 0  | 0  | 0  | 1  | 2  | 0  |
| Ras GTPase-activating protein-binding protein 1 OS=Homo sapiens GN=G3BP1 PE=1 SV=1                                             | G3BP1_HUMAN (+2)      | 52 kDa  | 0.79    | []                    | 0  | 0  | 3  | 0  | 1  | 2  |
| HCG2043376, isoform CRA_b OS=Homo sapiens GN=hCG_2043376 PE=3 SV=1                                                             | A0A024R0I3_HUMAN (+3) | 22 kDa  | 0.17    | []                    | 3  | 3  | 3  | 9  | 9  | 6  |
| Ras homolog gene family, member A, isoform CRA_a OS=Homo sapiens GN=RHOA PE=3 SV=1                                             | A0A024R324_HUMAN (+3) | 22 kDa  | 0.29    | []                    | 3  | 4  | 3  | 11 | 8  | 6  |
| Ras-GTPase activating protein SH3 domain-binding protein 2, isoform CRA_b OS=Homo sapiens GN=G3BP2 PE=4 SV=1                   | A0A024RDB2_HUMAN (+3) | 51 kDa  | 0.13    | []                    | 0  | 0  | 0  | 1  | 0  | 2  |
| Ras-related C3 botulinum toxin substrate 1 (Rho family, small GTP binding protein Rac1) OS=Homo sapiens GN=RAC1 PE=2 SV=1      | A4D2P0_HUMAN          | 23 kDa  | 0.13    | []                    | 1  | 1  | 0  | 6  | 9  | 2  |
| Ras-related C3 botulinum toxin substrate 1 (Rho family, small GTP binding protein Rac1) OS=Homo sapiens GN=RAC1 PE=2 SV=1      | A4D2P1_HUMAN (+1)     | 21 kDa  | 0.086   | []                    | 0  | 0  | 0  | 2  | 6  | 2  |
| Ras-related C3 botulinum toxin substrate 2 (Rho family, small GTP binding protein Rac2), isoform CRA_a OS=Homo sapiens GN=RAC2 | A0A024R1P2_HUMAN (+2) | 21 kDa  | 0.5     | []                    | 1  | 1  | 0  | 1  | 3  | 2  |
| Ras-related protein Rab-7a OS=Homo sapiens GN=RAB7A PE=1 SV=1                                                                  | RAB7A_HUMAN           | 23 kDa  | 0.55    | []                    | 6  | 5  | 6  | 6  | 10 | 10 |
| RAB8A, member RAS oncogene family, isoform CRA_a OS=Homo sapiens GN=RAB8A PE=3 SV=1                                            | A0A024R7I3_HUMAN (+1) | 23 kDa  | 0.0022  | BRAC1 high, Naive low | 0  | 0  | 1  | 5  | 4  | 5  |
| Ras-related protein Rab-8B (Fragment) OS=Homo sapiens GN=RAB8B PE=1 SV=1                                                       | H0YNE9_HUMAN (+1)     | 22 kDa  | 0.12    | []                    | 0  | 1  | 1  | 0  | 0  | 0  |
| Ras-related protein Rab-10 OS=Homo sapiens GN=RAB10 PE=1 SV=1                                                                  | RAB10_HUMAN           | 23 kDa  | 0.072   | []                    | 2  | 1  | 3  | 14 | 13 | 6  |
| Ras-related protein Rab-25 OS=Homo sapiens GN=RAB25 PE=1 SV=2                                                                  | RAB25_HUMAN           | 23 kDa  | 0.04    | BRAC1 high, Naive low | 0  | 0  | 0  | 2  | 3  | 1  |
| Ras-related protein Rab-34 OS=Homo sapiens GN=RAB34 PE=1 SV=1                                                                  | RAB34_HUMAN (+3)      | 29 kDa  | 0.00091 | BRAC1 low, Naive high | 1  | 1  | 2  | 0  | 0  | 0  |
| Ras-related protein Rab-35 (Fragment) OS=Homo sapiens GN=RAB35 PE=1 SV=1                                                       | F5H157_HUMAN (+1)     | 21 kDa  | 0.14    | []                    | 1  | 0  | 0  | 7  | 5  | 1  |
| Ras-related protein Ral-A (Fragment) OS=Homo sapiens GN=RALA PE=1 SV=1                                                         | H7C3P7_HUMAN (+1)     | 18 kDa  | 0.032   | BRAC1 high, Naive low | 0  | 1  | 2  | 9  | 8  | 5  |

|                                                                                                                                      |                       |         |         |                       |    |    |    |    |    |    |
|--------------------------------------------------------------------------------------------------------------------------------------|-----------------------|---------|---------|-----------------------|----|----|----|----|----|----|
| RecName: Full=Serum albumin; AltName: Full=BSA; AltName:                                                                             | sp ALBU_BOVIN         | 69 kDa  | 0.18    | []                    | 7  | 11 | 43 | 4  | 5  | 19 |
| RecName: Full=Trypsin; Flags: Precursor.                                                                                             | sp TRYP_PIG           | 24 kDa  | 0.081   | []                    | 22 | 12 | 15 | 9  | 9  | 3  |
| Receptor protein-tyrosine kinase OS=Homo sapiens GN=EPHA2 PE=4 SV=1                                                                  | A0A024QZ8_HUMAN (+1)  | 108 kDa | 0.26    | []                    | 1  | 3  | 3  | 10 | 6  | 4  |
| Receptor protein-tyrosine kinase OS=Homo sapiens GN=EPHB2 PE=1 SV=1                                                                  | B1AKC9_HUMAN (+3)     | 106 kDa | 0.12    | []                    | 0  | 0  | 0  | 3  | 3  | 0  |
| Receptor protein-tyrosine kinase OS=Homo sapiens GN=ERBB2 PE=1 SV=1                                                                  | B4DTR1_HUMAN (+2)     | 108 kDa | 0.21    | []                    | 1  | 0  | 1  | 7  | 4  | 1  |
| Receptor protein-tyrosine kinase OS=Homo sapiens GN=MET PE=3 SV=1                                                                    | A0A024R759_HUMAN (+1) | 156 kDa | 0.12    | []                    | 0  | 0  | 0  | 2  | 2  | 0  |
| Receptor protein-tyrosine kinase OS=Homo sapiens PE=2 SV=1                                                                           | A8K2T7_HUMAN (+5)     | 134 kDa | 0.99    | []                    | 2  | 3  | 2  | 4  | 5  | 3  |
| Receptor protein-tyrosine kinase OS=Homo sapiens PE=2 SV=1                                                                           | A8K2T6_HUMAN (+1)     | 108 kDa | 0.00029 | BRAC1 high, Naive low | 0  | 0  | 0  | 2  | 2  | 2  |
| Protein-tyrosine-phosphatase OS=Homo sapiens PE=2 SV=1                                                                               | B3KWM1_HUMAN          | 143 kDa | 0.00029 | BRAC1 high, Naive low | 0  | 0  | 0  | 4  | 3  | 4  |
| Receptor-type tyrosine-protein phosphatase F (Fragment) OS=Homo sapiens GN=PTPRF PE=1 SV=1                                           | H0Y6Z7_HUMAN (+1)     | 175 kDa | 0.0043  | BRAC1 high, Naive low | 0  | 0  | 0  | 5  | 6  | 5  |
| Receptor-type tyrosine-protein phosphatase OS=Homo sapiens PE=2 SV=1                                                                 | B7Z2A4_HUMAN (+3)     | 92 kDa  | 0.24    | []                    | 0  | 0  | 0  | 4  | 1  | 0  |
| Related RAS viral (R-ras) oncogene homolog, isoform CRA_a OS=Homo sapiens GN=RRAS PE=4 SV=1                                          | A0A024QZF2_HUMAN (+1) | 23 kDa  | 0.053   | []                    | 4  | 7  | 5  | 4  | 4  | 6  |
| Reticulocalbin-1 OS=Homo sapiens GN=RCN1 PE=1 SV=1                                                                                   | RCN1_HUMAN (+1)       | 39 kDa  | 0.16    | []                    | 5  | 6  | 8  | 3  | 6  | 13 |
| Reticulocalbin-2 OS=Homo sapiens GN=RCN2 PE=1 SV=1                                                                                   | RCN2_HUMAN            | 37 kDa  | 0.83    | []                    | 1  | 2  | 0  | 2  | 1  | 2  |
| Reticulocalbin-3 OS=Homo sapiens GN=RCN3 PE=1 SV=1                                                                                   | RCN3_HUMAN            | 37 kDa  | 0.008   | BRAC1 low, Naive high | 5  | 3  | 8  | 0  | 0  | 0  |
| Reticulon OS=Homo sapiens GN=RTN4 PE=1 SV=1                                                                                          | F8W914_HUMAN          | 37 kDa  | 0.11    | []                    | 4  | 7  | 25 | 1  | 0  | 7  |
| Reticulon-4 OS=Homo sapiens GN=RTN4 PE=1 SV=2                                                                                        | RTN4_HUMAN            | 130 kDa | 0.12    | []                    | 4  | 6  | 24 | 1  | 0  | 6  |
| Retinal dehydrogenase 1 OS=Homo sapiens GN=ALDH1A1 PE=1 SV=2                                                                         | AL1A1_HUMAN (+2)      | 55 kDa  | 0.65    | []                    | 7  | 5  | 15 | 13 | 18 | 18 |
| Retinol dehydrogenase 11 OS=Homo sapiens GN=RDH11 PE=1 SV=2                                                                          | RDH11_HUMAN           | 35 kDa  | 0.84    | []                    | 2  | 0  | 1  | 2  | 1  | 4  |
| Retinol dehydrogenase 13 OS=Homo sapiens GN=RDH13 PE=1 SV=2                                                                          | RDH13_HUMAN (+1)      | 36 kDa  | 0.37    | []                    | 0  | 0  | 0  | 0  | 0  | 2  |
| Rho GDP-dissociation inhibitor 1 OS=Homo sapiens GN=ARHGDI1 PE=1 SV=3                                                                | GDIR1_HUMAN (+3)      | 23 kDa  | 0.48    | []                    | 1  | 1  | 4  | 0  | 3  | 3  |
| Rho GTPase activating protein OS=Homo sapiens PE=2 SV=1                                                                              | A9UK01_HUMAN (+1)     | 75 kDa  | 0.27    | []                    | 0  | 0  | 0  | 0  | 1  | 7  |
| Rho GTPase-activating protein 1 OS=Homo sapiens GN=ARHGAP1 PE=1 SV=1                                                                 | RHG01_HUMAN           | 50 kDa  | 0.57    | []                    | 1  | 1  | 5  | 0  | 0  | 7  |
| Rho GTPase-activating protein 35 OS=Homo sapiens GN=ARHGAP35 PE=1 SV=3                                                               | RHG35_HUMAN           | 171 kDa | 0.13    | []                    | 0  | 0  | 0  | 1  | 0  | 2  |
| Rho guanine nucleotide exchange factor 2 OS=Homo sapiens GN=ARHGEF2 PE=1 SV=4                                                        | ARHG2_HUMAN (+2)      | 112 kDa | 0.37    | []                    | 0  | 0  | 0  | 0  | 0  | 3  |
| Rho guanine nucleotide exchange factor 12 OS=Homo sapiens GN=ARHGEF12 PE=1 SV=1                                                      | ARHGC_HUMAN (+1)      | 173 kDa | 0.37    | []                    | 0  | 0  | 0  | 0  | 0  | 2  |
| Rho guanine nucleotide exchange factor 16 OS=Homo sapiens GN=ARHGEF16 PE=1 SV=1                                                      | ARHGG_HUMAN (+1)      | 80 kDa  | 0.14    | []                    | 0  | 0  | 0  | 1  | 1  | 6  |
| Rho guanine nucleotide exchange factor (GEF) 1, isoform CRA_e OS=Homo sapiens GN=ARHGEF1 PE=4 SV=1                                   | A0A024R0R1_HUMAN (+2) | 102 kDa | 0.095   | []                    | 0  | 0  | 0  | 1  | 6  | 13 |
| Rho-associated protein kinase 2 OS=Homo sapiens GN=ROCK2 PE=1 SV=4                                                                   | ROCK2_HUMAN           | 161 kDa | 0.17    | []                    | 0  | 0  | 1  | 2  | 5  | 1  |
| Rhopilin-2 OS=Homo sapiens GN=RHPN2 PE=1 SV=1                                                                                        | RHPN2_HUMAN           | 77 kDa  | 0.37    | []                    | 0  | 0  | 0  | 0  | 0  | 3  |
| Ribonuclease inhibitor (Fragment) OS=Homo sapiens GN=RNH1 PE=1 SV=1                                                                  | H0YCR7_HUMAN          | 30 kDa  | 0.98    | []                    | 0  | 0  | 5  | 2  | 0  | 7  |
| Ribonuclease inhibitor OS=Homo sapiens GN=RNH1 PE=1 SV=2                                                                             | RIN1_HUMAN            | 50 kDa  | 0.58    | []                    | 2  | 4  | 6  | 2  | 3  | 12 |
| Ribonucleoside-diphosphate reductase large subunit OS=Homo sapiens GN=RRM1 PE=1 SV=1                                                 | RIR1_HUMAN (+2)       | 90 kDa  | 0.37    | []                    | 0  | 0  | 0  | 0  | 0  | 6  |
| Ribosomal L1 domain-containing protein 1 OS=Homo sapiens GN=RSL1D1 PE=1 SV=3                                                         | RL1D1_HUMAN (+3)      | 55 kDa  | 0.37    | []                    | 0  | 0  | 0  | 0  | 0  | 4  |
| Ribosomal protein L5 OS=Homo sapiens GN=RPL5 PE=2 SV=1                                                                               | A2RUM7_HUMAN (+3)     | 34 kDa  | 0.092   | []                    | 5  | 3  | 6  | 4  | 3  | 6  |
| Ribosomal protein L7, isoform CRA_a OS=Homo sapiens GN=RPL7 PE=3 SV=1                                                                | A0A024R814_HUMAN (+1) | 30 kDa  | 0.55    | []                    | 3  | 2  | 6  | 6  | 5  | 11 |
| Ribosomal protein L11, isoform CRA_b OS=Homo sapiens GN=RPL11 PE=2 SV=1                                                              | QSVVD0_HUMAN (+1)     | 20 kDa  | 0.98    | []                    | 1  | 1  | 1  | 2  | 2  | 1  |
| Ribosomal protein L13a variant (Fragment) OS=Homo sapiens PE=2 SV=1                                                                  | Q53H34_HUMAN (+2)     | 24 kDa  | 0.19    | []                    | 3  | 3  | 3  | 3  | 4  | 5  |
| Ribosomal protein L15 OS=Homo sapiens GN=RPL15 PE=3 SV=1                                                                             | A0A024R2Q4_HUMAN (+3) | 24 kDa  | 0.39    | []                    | 0  | 0  | 2  | 1  | 1  | 6  |
| Ribosomal protein L18, isoform CRA_c OS=Homo sapiens GN=RPL18 PE=4 SV=1                                                              | A0A024QZD1_HUMAN (+4) | 22 kDa  | 0.64    | []                    | 7  | 4  | 3  | 8  | 5  | 8  |
| Ribosomal protein L19 OS=Homo sapiens GN=RPL19 PE=1 SV=1                                                                             | J3KTE4_HUMAN (+4)     | 23 kDa  | 0.87    | []                    | 2  | 1  | 1  | 3  | 2  | 3  |
| Ribosomal protein L23, isoform CRA_b OS=Homo sapiens GN=RPL23 PE=3 SV=1                                                              | A0A024R1Q8_HUMAN (+4) | 15 kDa  | 0.82    | []                    | 1  | 1  | 1  | 2  | 1  | 2  |
| Ribosomal protein L30, isoform CRA_b OS=Homo sapiens GN=RPL30 PE=3 SV=1                                                              | A0A024R9D3_HUMAN (+2) | 13 kDa  | 0.74    | []                    | 0  | 1  | 2  | 1  | 1  | 4  |
| Ribosomal protein L35, isoform CRA_a OS=Homo sapiens GN=RPL35 PE=3 SV=1                                                              | A0A024R866_HUMAN (+2) | 18 kDa  | 0.82    | []                    | 1  | 2  | 1  | 3  | 2  | 1  |
| Ribosomal protein S2 OS=Homo sapiens GN=RPS2 PE=2 SV=1                                                                               | Q3KQT6_HUMAN (+2)     | 31 kDa  | 0.71    | []                    | 1  | 1  | 4  | 2  | 1  | 11 |
| Ribosomal protein S5, isoform CRA_a OS=Homo sapiens GN=RPS5 PE=3 SV=1                                                                | A0A024R4Q8_HUMAN (+3) | 23 kDa  | 0.9     | []                    | 3  | 3  | 3  | 3  | 4  | 9  |
| Ribosomal protein S6 kinase alpha-1 OS=Homo sapiens GN=RPS6KA1 PE=1 SV=2                                                             | KS6A1_HUMAN (+2)      | 83 kDa  | 0.37    | []                    | 0  | 0  | 0  | 0  | 0  | 4  |
| Ribosomal protein S6 kinase alpha-3 OS=Homo sapiens GN=RPS6KA3 PE=1 SV=1                                                             | KS6A3_HUMAN (+3)      | 84 kDa  | 0.37    | []                    | 0  | 0  | 0  | 0  | 0  | 3  |
| Ribosomal protein, large, P0, isoform CRA_b OS=Homo sapiens GN=RPLP0 PE=3 SV=1                                                       | A0A024RBS2_HUMAN (+3) | 34 kDa  | 0.11    | []                    | 6  | 9  | 10 | 8  | 7  | 16 |
| Ribosomal protein, large, P1, isoform CRA_a OS=Homo sapiens GN=RPLP1 PE=3 SV=1                                                       | A0A024R608_HUMAN (+2) | 12 kDa  | 0.88    | []                    | 0  | 0  | 2  | 1  | 1  | 1  |
| Ribosomal protein, large, P2, isoform CRA_a OS=Homo sapiens GN=RPLP2 PE=3 SV=1                                                       | A0A024RCA7_HUMAN (+1) | 12 kDa  | 0.063   | []                    | 7  | 6  | 6  | 6  | 5  | 3  |
| Ribosome-binding protein 1 OS=Homo sapiens GN=RRBP1 PE=1 SV=1                                                                        | A0A0A0MRV0_HUMAN (+2) | 152 kDa | 0.0069  | BRAC1 low, Naive high | 22 | 29 | 23 | 7  | 10 | 11 |
| RuvB-like 1 (Fragment) OS=Homo sapiens GN=RUVBL1 PE=2 SV=1                                                                           | B5BU1_HUMAN (+1)      | 50 kDa  | 0.13    | []                    | 0  | 1  | 3  | 5  | 3  | 12 |
| RuvB-like 2 OS=Homo sapiens GN=RUVBL2 PE=1 SV=3                                                                                      | RUVB2_HUMAN           | 51 kDa  | 0.11    | []                    | 0  | 0  | 1  | 1  | 5  | 11 |
| S100 calcium binding protein A10 (Annexin II ligand, calpactin I, light polypeptide (P11)), isoform CRA_b (Fragment) OS=Homo sapiens | D3DV26_HUMAN (+2)     | 22 kDa  | 0.4     | []                    | 3  | 1  | 2  | 10 | 8  | 1  |
| S-methyl-5'-thioadenosine phosphorylase OS=Homo sapiens GN=MTAP PE=1 SV=1                                                            | B4DUC8_HUMAN (+1)     | 33 kDa  | 0.23    | []                    | 0  | 0  | 0  | 1  | 0  | 5  |
| SCAMP3 protein (Fragment) OS=Homo sapiens GN=SCAMP3 PE=2 SV=1                                                                        | Q6FHJ5_HUMAN (+1)     | 38 kDa  | 0.68    | []                    | 0  | 3  | 2  | 1  | 2  | 3  |
| SEC23-interacting protein OS=Homo sapiens GN=SEC23IP PE=1 SV=1                                                                       | S23IP_HUMAN (+3)      | 111 kDa | 0.37    | []                    | 0  | 0  | 0  | 0  | 0  | 2  |
| SEC24 related gene family, member C (S. cerevisiae), isoform CRA_a OS=Homo sapiens GN=SEC24C PE=4 SV=1                               | A0A024QZM6_HUMAN (+3) | 118 kDa | 0.2     | []                    | 1  | 0  | 1  | 2  | 4  | 2  |
| SEC31-like 1 (S. cerevisiae), isoform CRA_d OS=Homo sapiens GN=SEC31L1 PE=4 SV=1                                                     | A0A024RDD3_HUMAN (+3) | 133 kDa | 0.36    | []                    | 0  | 0  | 1  | 1  | 0  | 9  |
| SH3 domain-binding protein 1 OS=Homo sapiens GN=SH3BP1 PE=1 SV=3                                                                     | 3BP1_HUMAN (+4)       | 76 kDa  | 0.37    | []                    | 0  | 0  | 0  | 0  | 0  | 2  |
| SH3-domain GRB2-like endophilin B2, isoform CRA_a OS=Homo sapiens GN=SH3GLB2 PE=4 SV=1                                               | A0A024R896_HUMAN (+2) | 44 kDa  | 0.07    | []                    | 0  | 0  | 0  | 1  | 1  | 4  |

|                                                                                                                                                          |                       |         |         |                       |    |    |    |    |    |    |
|----------------------------------------------------------------------------------------------------------------------------------------------------------|-----------------------|---------|---------|-----------------------|----|----|----|----|----|----|
| SHC-transforming protein 1 OS=Homo sapiens GN=SHC1 PE=1 SV=4                                                                                             | SHC1_HUMAN (+4)       | 63 kDa  | 0.37    | []                    | 0  | 0  | 0  | 0  | 0  | 2  |
| SPARC OS=Homo sapiens GN=SPARC PE=1 SV=1                                                                                                                 | SPRC_HUMAN (+3)       | 35 kDa  | 0.37    | []                    | 0  | 0  | 2  | 0  | 0  | 0  |
| SPATS2-like protein OS=Homo sapiens GN=SPATS2L PE=1 SV=2                                                                                                 | SPS2L_HUMAN (+3)      | 62 kDa  | 0.37    | []                    | 0  | 0  | 0  | 0  | 0  | 2  |
| SPINT2 protein (Fragment) OS=Homo sapiens GN=SPINT2 PE=2 SV=1                                                                                            | Q6LEU8_HUMAN (+1)     | 28 kDa  | 0.003   | BRAC1 high, Naive low | 0  | 0  | 0  | 3  | 4  | 3  |
| Uncharacterized protein (Fragment) OS=Homo sapiens PE=4 SV=1                                                                                             | K7EQZ3_HUMAN          | 16 kDa  | 0.37    | []                    | 0  | 0  | 0  | 0  | 1  | 0  |
| START domain containing 10, isoform CRA_a OS=Homo sapiens GN=STARD10 PE=4 SV=1                                                                           | A0A024R5L8_HUMAN (+5) | 33 kDa  | 0.11    | []                    | 0  | 0  | 0  | 1  | 1  | 5  |
| STX12 protein (Fragment) OS=Homo sapiens GN=STX12 PE=2 SV=1                                                                                              | Q6LEU0_HUMAN (+1)     | 31 kDa  | 0.061   | []                    | 3  | 1  | 3  | 1  | 1  | 0  |
| SUMO-activating enzyme subunit 1 OS=Homo sapiens GN=SAE1 PE=1 SV=1                                                                                       | SAE1_HUMAN (+2)       | 38 kDa  | 0.13    | []                    | 0  | 0  | 0  | 0  | 1  | 2  |
| SUMO-activating enzyme subunit 2 OS=Homo sapiens GN=UBA2 PE=1 SV=2                                                                                       | SAE2_HUMAN (+3)       | 71 kDa  | 0.37    | []                    | 0  | 0  | 0  | 0  | 0  | 3  |
| SUN domain-containing protein 2 OS=Homo sapiens GN=SUN2 PE=1 SV=3                                                                                        | SUN2_HUMAN (+4)       | 80 kDa  | 0.48    | []                    | 0  | 0  | 3  | 0  | 0  | 1  |
| Sarcoplasmic/endoplasmic reticulum calcium ATPase 2 OS=Homo sapiens GN=ATP2A2 PE=1 SV=1                                                                  | AT2A2_HUMAN           | 115 kDa | 0.12    | []                    | 7  | 18 | 11 | 7  | 7  | 14 |
| Scavenger receptor class B, member 2, isoform CRA_a OS=Homo sapiens GN=SCARB2 PE=4 SV=1                                                                  | A0A024RDG6_HUMAN (+1) | 54 kDa  | 0.21    | []                    | 7  | 7  | 2  | 2  | 4  | 7  |
| Sec1 family domain-containing protein 1 OS=Homo sapiens GN=SCFD1 PE=1 SV=4                                                                               | SCFD1_HUMAN (+1)      | 72 kDa  | 0.35    | []                    | 1  | 0  | 2  | 0  | 0  | 2  |
| Sec1 family domain-containing protein 2 OS=Homo sapiens GN=SCFD2 PE=1 SV=2                                                                               | SCFD2_HUMAN           | 75 kDa  | 0.37    | []                    | 0  | 0  | 0  | 0  | 0  | 2  |
| Sec61 alpha 1 subunit (S. cerevisiae), isoform CRA_c OS=Homo sapiens GN=SEC61A1 PE=2 SV=1                                                                | B3KNF6_HUMAN (+2)     | 52 kDa  | 0.81    | []                    | 1  | 3  | 4  | 1  | 4  | 11 |
| Selenoprotein O OS=Homo sapiens GN=SELO PE=2 SV=3                                                                                                        | SELO_HUMAN (+1)       | 73 kDa  | 0.37    | []                    | 0  | 0  | 0  | 0  | 0  | 3  |
| Septapterin reductase OS=Homo sapiens GN=SPR PE=1 SV=1                                                                                                   | SPRE_HUMAN            | 28 kDa  | 0.0037  | BRAC1 high, Naive low | 0  | 0  | 0  | 4  | 4  | 3  |
| Septin 9, isoform CRA_a OS=Homo sapiens GN=SEPT9 PE=3 SV=1                                                                                               | A0A024R8V0_HUMAN (+1) | 64 kDa  | 0.61    | []                    | 2  | 6  | 13 | 7  | 9  | 10 |
| Septin-2 OS=Homo sapiens GN=SEPT2 PE=1 SV=1                                                                                                              | SEPT2_HUMAN           | 41 kDa  | 0.28    | []                    | 11 | 10 | 9  | 12 | 13 | 15 |
| Septin-8 OS=Homo sapiens GN=SEPT8 PE=1 SV=1                                                                                                              | A6NMH6_HUMAN (+1)     | 50 kDa  | 0.00019 | BRAC1 high, Naive low | 0  | 0  | 0  | 5  | 6  | 6  |
| Septin-11 OS=Homo sapiens GN=SEPT11 PE=1 SV=1                                                                                                            | D6RER5_HUMAN (+2)     | 50 kDa  | 0.075   | []                    | 5  | 6  | 10 | 7  | 9  | 5  |
| Sequestosome-1 OS=Homo sapiens GN=SQSTM1 PE=1 SV=1                                                                                                       | E7EMC7_HUMAN (+1)     | 41 kDa  | 0.24    | []                    | 1  | 2  | 0  | 3  | 3  | 4  |
| Serine hydroxymethyltransferase OS=Homo sapiens GN=SHMT2 PE=3 SV=1                                                                                       | A0A024RB99_HUMAN (+4) | 53 kDa  | 0.045   | BRAC1 low, Naive high | 4  | 4  | 4  | 3  | 4  | 5  |
| Serine hydroxymethyltransferase OS=Homo sapiens PE=2 SV=1                                                                                                | B4DW25_HUMAN          | 48 kDa  | 0.045   | BRAC1 low, Naive high | 4  | 4  | 4  | 3  | 4  | 5  |
| Serine hydroxymethyltransferase OS=Homo sapiens PE=2 SV=1                                                                                                | B4DP88_HUMAN          | 48 kDa  | 0.02    | BRAC1 low, Naive high | 4  | 4  | 4  | 2  | 3  | 4  |
| Serine incorporator 1 OS=Homo sapiens GN=SERINC1 PE=1 SV=1                                                                                               | SERC1_HUMAN           | 50 kDa  | 0.62    | []                    | 1  | 1  | 2  | 3  | 1  | 1  |
| Serine palmitoyltransferase 2 OS=Homo sapiens GN=SPTLC2 PE=1 SV=1                                                                                        | SPTC2_HUMAN (+1)      | 63 kDa  | 0.17    | []                    | 0  | 0  | 0  | 0  | 1  | 3  |
| Serine palmitoyltransferase, long chain base subunit 1, isoform CRA_a OS=Homo sapiens GN=SPTLC1 PE=4 SV=1                                                | A0A024R277_HUMAN (+1) | 53 kDa  | 0.37    | []                    | 0  | 0  | 2  | 1  | 1  | 7  |
| STE20/SPS1-related proline-alanine-rich protein kinase OS=Homo sapiens GN=STK39 PE=1 SV=3                                                                | STK39_HUMAN (+2)      | 59 kDa  | 0.11    | []                    | 0  | 0  | 0  | 1  | 4  | 13 |
| Serine threonine kinase 39 isoform D (Fragment) OS=Homo sapiens GN=STK39 PE=2 SV=1                                                                       | X5D7P8_HUMAN          | 52 kDa  | 0.11    | []                    | 0  | 0  | 0  | 1  | 4  | 13 |
| Serine--tRNA ligase, cytoplasmic OS=Homo sapiens GN=SARS PE=1 SV=3                                                                                       | SYSC_HUMAN (+3)       | 59 kDa  | 0.87    | []                    | 0  | 0  | 3  | 0  | 0  | 6  |
| Serine--tRNA ligase, mitochondrial OS=Homo sapiens GN=SARS2 PE=1 SV=1                                                                                    | MOQWZ7_HUMAN (+2)     | 58 kDa  | 0.011   | BRAC1 high, Naive low | 0  | 0  | 0  | 1  | 2  | 3  |
| Serine-threonine kinase receptor-associated protein OS=Homo sapiens GN=STRAP PE=1 SV=1                                                                   | STRAP_HUMAN           | 38 kDa  | 0.26    | []                    | 0  | 0  | 1  | 2  | 0  | 5  |
| Serine/arginine-rich splicing factor 3 OS=Homo sapiens GN=SRSF3 PE=1 SV=1                                                                                | SRSF3_HUMAN (+2)      | 19 kDa  | 0.47    | []                    | 2  | 1  | 0  | 0  | 0  | 3  |
| Serine/arginine-rich splicing factor 6 OS=Homo sapiens GN=SRSF6 PE=1 SV=2                                                                                | SRSF6_HUMAN (+3)      | 40 kDa  | 0.37    | []                    | 0  | 0  | 0  | 0  | 0  | 2  |
| Serine/arginine-rich splicing factor 7 OS=Homo sapiens GN=SRSF7 PE=1 SV=1                                                                                | SRSF7_HUMAN (+3)      | 27 kDa  | 0.37    | []                    | 0  | 0  | 0  | 0  | 0  | 2  |
| Serine/arginine-rich splicing factor 10 OS=Homo sapiens GN=SRSF10 PE=1 SV=1                                                                              | SRS10_HUMAN (+2)      | 31 kDa  | 0.37    | []                    | 0  | 0  | 0  | 0  | 0  | 2  |
| Serine/threonine-protein kinase 24 OS=Homo sapiens GN=STK24 PE=1 SV=1                                                                                    | B4DR80_HUMAN (+4)     | 46 kDa  | 0.077   | []                    | 0  | 0  | 1  | 1  | 4  | 6  |
| Serine/threonine-protein kinase 26 OS=Homo sapiens GN=STK26 PE=1 SV=1                                                                                    | B4E0Y9_HUMAN (+3)     | 49 kDa  | 0.078   | []                    | 0  | 0  | 0  | 1  | 2  | 6  |
| Serine/threonine-protein kinase MARK2 OS=Homo sapiens GN=MARK2 PE=1 SV=3                                                                                 | E9PC69_HUMAN          | 87 kDa  | 0.024   | BRAC1 high, Naive low | 0  | 0  | 0  | 5  | 2  | 8  |
| Serine/threonine-protein kinase N2 OS=Homo sapiens GN=PKN2 PE=1 SV=1                                                                                     | PKN2_HUMAN            | 112 kDa | 0.031   | BRAC1 high, Naive low | 0  | 0  | 0  | 2  | 1  | 1  |
| Serine/threonine-protein kinase OXR1 OS=Homo sapiens GN=OXSR1 PE=1 SV=1                                                                                  | OXSR1_HUMAN (+1)      | 58 kDa  | 0.98    | []                    | 0  | 0  | 2  | 0  | 0  | 3  |
| Serine/threonine-protein kinase TBK1 OS=Homo sapiens GN=TBK1 PE=1 SV=1                                                                                   | TBK1_HUMAN (+1)       | 84 kDa  | 0.37    | []                    | 0  | 0  | 0  | 0  | 0  | 3  |
| Serine/threonine-protein kinase mTOR OS=Homo sapiens GN=MTOR PE=1 SV=1                                                                                   | MTOR_HUMAN (+3)       | 289 kDa | 0.37    | []                    | 0  | 0  | 0  | 0  | 0  | 2  |
| Serine/threonine-protein phosphatase 2A 65 kDa regulatory subunit A alpha isoform OS=Homo sapiens GN=PPP2R1A PE=1 SV=4                                   | 2AAA_HUMAN (+3)       | 65 kDa  | 0.17    | []                    | 0  | 1  | 7  | 6  | 9  | 11 |
| Serine/threonine-protein phosphatase 2A catalytic subunit alpha isoform OS=Homo sapiens GN=PPP2CA PE=1 SV=1                                              | PP2AA_HUMAN (+6)      | 36 kDa  | 0.79    | []                    | 0  | 0  | 2  | 0  | 1  | 3  |
| Serine/threonine-protein phosphatase 2B catalytic subunit alpha isoform OS=Homo sapiens GN=PPP3CA PE=1 SV=1                                              | PP2BA_HUMAN           | 59 kDa  | 0.12    | []                    | 0  | 0  | 0  | 0  | 2  | 3  |
| Serine/threonine-protein phosphatase 6 regulatory subunit 1 OS=Homo sapiens GN=PPP6R1 PE=1 SV=5                                                          | PP6R1_HUMAN           | 97 kDa  | 0.37    | []                    | 0  | 0  | 0  | 0  | 0  | 2  |
| Serine/threonine-protein phosphatase 6 regulatory subunit 3 OS=Homo sapiens GN=PPP6R3 PE=1 SV=2                                                          | PP6R3_HUMAN (+3)      | 98 kDa  | 0.37    | []                    | 0  | 0  | 0  | 0  | 0  | 4  |
| Serine/threonine-protein phosphatase OS=Homo sapiens GN=PPP5C PE=3 SV=1                                                                                  | A0A024R0Q7_HUMAN (+6) | 57 kDa  | 0.018   | BRAC1 high, Naive low | 0  | 0  | 0  | 2  | 2  | 1  |
| Serine/threonine-protein phosphatase PGAM5, mitochondrial OS=Homo sapiens GN=PGAM5 PE=1 SV=2                                                             | PGAM5_HUMAN           | 32 kDa  | 0.13    | []                    | 0  | 0  | 0  | 0  | 2  | 4  |
| Serine/threonine-protein phosphatase OS=Homo sapiens GN=PPP1CC PE=3 SV=1                                                                                 | A0A024RBP2_HUMAN (+3) | 37 kDa  | 0.042   | BRAC1 high, Naive low | 0  | 2  | 5  | 15 | 11 | 10 |
| Serine/threonine-protein phosphatase PP1-alpha catalytic subunit OS=Homo sapiens GN=PPP1CA PE=1 SV=1                                                     | PP1A_HUMAN            | 38 kDa  | 0.034   | BRAC1 high, Naive low | 2  | 4  | 5  | 15 | 13 | 11 |
| Serine/threonine-protein phosphatase PP1-beta catalytic subunit OS=Homo sapiens GN=PPP1CB PE=1 SV=3                                                      | PP1B_HUMAN (+1)       | 37 kDa  | 0.059   | []                    | 1  | 4  | 6  | 15 | 12 | 11 |
| Serpin B6 OS=Homo sapiens GN=SERPINB6 PE=1 SV=3                                                                                                          | SPB6_HUMAN (+3)       | 43 kDa  | 0.12    | []                    | 0  | 0  | 0  | 0  | 2  | 2  |
| Serpin peptidase inhibitor, clade H (Heat shock protein 47), member 1, (Collagen binding protein 1), isoform CRA_a OS=Homo sapiens GN=SERPINC1 PE=1 SV=1 | A0A024R5K8_HUMAN (+1) | 46 kDa  | 0.027   | BRAC1 low, Naive high | 42 | 37 | 29 | 8  | 13 | 14 |
| Serum deprivation-response protein OS=Homo sapiens GN=SDPR PE=1 SV=3                                                                                     | SDPR_HUMAN (+1)       | 47 kDa  | 0.12    | []                    | 1  | 0  | 2  | 0  | 0  | 0  |
| Sickle tail protein homolog OS=Homo sapiens GN=KIAA1217 PE=1 SV=2                                                                                        | SKT_HUMAN             | 214 kDa | 0.37    | []                    | 0  | 0  | 0  | 0  | 2  | 0  |
| Sideroflexin OS=Homo sapiens GN=SFXN3 PE=1 SV=1                                                                                                          | A0A0A0MS41_HUMAN      | 36 kDa  | 0.13    | []                    | 3  | 2  | 9  | 2  | 2  | 4  |
| Sideroflexin-1 OS=Homo sapiens GN=SFXN1 PE=1 SV=4                                                                                                        | SFXN1_HUMAN           | 36 kDa  | 0.58    | []                    | 2  | 1  | 3  | 1  | 7  | 6  |
| Signal recognition particle receptor beta subunit OS=Homo sapiens GN=SRPRB PE=2 SV=1                                                                     | Q549N5_HUMAN (+1)     | 30 kDa  | 0.37    | []                    | 2  | 2  | 2  | 3  | 4  | 6  |
| Signal recognition particle receptor subunit alpha OS=Homo sapiens GN=SRPR PE=1 SV=2                                                                     | SRPR_HUMAN            | 70 kDa  | 0.15    | []                    | 0  | 2  | 1  | 3  | 3  | 9  |



|                                                                                                                                    |                       |         |         |                       |    |    |    |     |     |    |
|------------------------------------------------------------------------------------------------------------------------------------|-----------------------|---------|---------|-----------------------|----|----|----|-----|-----|----|
| Signal recognition particle subunit SRP68 OS=Homo sapiens GN=SRP68 PE=1 SV=2                                                       | SRP68_HUMAN           | 71 kDa  | 0.37    | []                    | 0  | 0  | 0  | 0   | 0   | 4  |
| Signal recognition particle subunit SRP72 OS=Homo sapiens GN=SRP72 PE=1 SV=3                                                       | SRP72_HUMAN (+1)      | 75 kDa  | 0.87    | []                    | 0  | 0  | 2  | 0   | 0   | 4  |
| Signal transducer and activator of transcription 1-alpha/beta OS=Homo sapiens GN=STAT1 PE=1 SV=2                                   | STAT1_HUMAN           | 87 kDa  | 0.57    | []                    | 4  | 3  | 17 | 6   | 4   | 17 |
| Signal transducer and activator of transcription 3 OS=Homo sapiens GN=STAT3 PE=1 SV=2                                              | STAT3_HUMAN (+5)      | 88 kDa  | 0.69    | []                    | 0  | 0  | 1  | 0   | 0   | 3  |
| Signal-induced proliferation-associated 1 like 3 OS=Homo sapiens GN=SIPA1L3 PE=2 SV=1                                              | B2RWPO_HUMAN (+1)     | 195 kDa | 0.16    | []                    | 0  | 0  | 0  | 2   | 1   | 0  |
| Single Ig IL-1-related receptor OS=Homo sapiens GN=SIGIRR PE=1 SV=3                                                                | SIGIR_HUMAN           | 46 kDa  | 0.00058 | BRAC1 high, Naive low | 0  | 0  | 0  | 4   | 3   | 4  |
| Single-stranded DNA-binding protein OS=Homo sapiens GN=SSBP1 PE=2 SV=1                                                             | A4D1U3_HUMAN (+2)     | 17 kDa  | 0.23    | []                    | 5  | 4  | 2  | 4   | 4   | 0  |
| Sister chromatid cohesion protein PDS5 homolog A OS=Homo sapiens GN=PDS5A PE=1 SV=1                                                | PDS5A_HUMAN (+1)      | 151 kDa | 0.37    | []                    | 0  | 0  | 0  | 0   | 0   | 2  |
| Sister chromatid cohesion protein PDS5 homolog B OS=Homo sapiens GN=PDS5B PE=1 SV=1                                                | PDS5B_HUMAN (+1)      | 165 kDa | 0.37    | []                    | 0  | 0  | 0  | 0   | 0   | 2  |
| Slingshot homolog 3 (Drosophila), isoform CRA_f OS=Homo sapiens GN=SSH3 PE=4 SV=1                                                  | A0A024R5J4_HUMAN (+1) | 73 kDa  | 0.13    | []                    | 0  | 0  | 0  | 1   | 0   | 2  |
| Small nuclear ribonucleoprotein Sm D1 OS=Homo sapiens GN=SNRPD1 PE=1 SV=1                                                          | SMD1_HUMAN (+2)       | 13 kDa  | 0.37    | []                    | 0  | 0  | 0  | 0   | 0   | 2  |
| Sodium/calcium exchanger 1 OS=Homo sapiens GN=SLC8A1 PE=1 SV=3                                                                     | NAC1_HUMAN (+1)       | 109 kDa | 0.37    | []                    | 0  | 0  | 3  | 0   | 0   | 0  |
| Potassium-transporting ATPase alpha chain 2 OS=Homo sapiens GN=ATP12A PE=1 SV=3                                                    | AT12A_HUMAN           | 116 kDa | 0.13    | []                    | 0  | 0  | 0  | 0   | 2   | 4  |
| Sodium/potassium-transporting ATPase subunit alpha OS=Homo sapiens PE=2 SV=1                                                       | B3KW93_HUMAN          | 101 kDa | 0.086   | []                    | 5  | 5  | 7  | 39  | 35  | 14 |
| Sodium/potassium-transporting ATPase subunit alpha OS=Homo sapiens PE=2 SV=1                                                       | B7Z3F8_HUMAN          | 108 kDa | 0.036   | BRAC1 high, Naive low | 0  | 0  | 0  | 40  | 39  | 14 |
| Sodium/potassium-transporting ATPase subunit alpha-1 OS=Homo sapiens GN=ATP1A1 PE=1 SV=1                                           | AT1A1_HUMAN           | 113 kDa | 0.12    | []                    | 21 | 26 | 31 | 121 | 108 | 53 |
| Sodium/potassium-transporting ATPase subunit beta OS=Homo sapiens GN=ATP1B1 PE=2 SV=1                                              | A3KL5_HUMAN (+4)      | 35 kDa  | 0.029   | BRAC1 high, Naive low | 0  | 0  | 2  | 15  | 15  | 7  |
| Sodium/potassium-transporting ATPase subunit beta-3 OS=Homo sapiens GN=ATP1B3 PE=1 SV=1                                            | AT1B3_HUMAN           | 32 kDa  | 0.18    | []                    | 4  | 4  | 5  | 6   | 6   | 5  |
| Solute carrier family 12 member 4 OS=Homo sapiens GN=SLC12A4 PE=1 SV=2                                                             | S12A4_HUMAN (+2)      | 121 kDa | 0.37    | []                    | 0  | 0  | 2  | 0   | 0   | 0  |
| Solute carrier family 12 member 7 OS=Homo sapiens GN=SLC12A7 PE=1 SV=1                                                             | A0A0G2JNW7_HUMAN (+1) | 119 kDa | 0.0037  | BRAC1 high, Naive low | 0  | 0  | 0  | 6   | 7   | 5  |
| Solute carrier family 16 (Monocarboxylic acid transporters), member 1, isoform CRA_b OS=Homo sapiens GN=SLC16A1 PE=4 SV=1          | A0A024R0H1_HUMAN (+2) | 54 kDa  | 0.12    | []                    | 0  | 1  | 4  | 9   | 6   | 5  |
| cDNA FLJ53399, highly similar to Monocarboxylate transporter 1 OS=Homo sapiens PE=2 SV=1                                           | B4E106_HUMAN          | 52 kDa  | 0.16    | []                    | 0  | 1  | 4  | 10  | 5   | 5  |
| Solute carrier family 16 (Monocarboxylic acid transporters), member 3, isoform CRA_a OS=Homo sapiens GN=SLC16A3 PE=4 SV=1          | A0A024R8U1_HUMAN (+1) | 49 kDa  | 0.58    | []                    | 2  | 4  | 6  | 3   | 6   | 8  |
| Solute carrier family 22 (Organic cation transporter), member 18, isoform CRA_a OS=Homo sapiens GN=SLC22A18 PE=1 SV=1              | A0A024RCG2_HUMAN (+3) | 45 kDa  | 0.19    | []                    | 0  | 0  | 0  | 2   | 0   | 1  |
| Solute carrier family 25 (Mitochondrial carrier phosphate carrier), member 3, isoform CRA_a OS=Homo sapiens GN=SLC25A3 PE=3 SV=1   | A0A024RBE8_HUMAN (+3) | 40 kDa  | 0.011   | BRAC1 low, Naive high | 4  | 3  | 5  | 2   | 1   | 3  |
| Solute carrier family 27 (Fatty acid transporter), member 2 variant (Fragment) OS=Homo sapiens PE=2 SV=1                           | Q53G52_HUMAN (+1)     | 70 kDa  | 0.14    | []                    | 0  | 0  | 0  | 1   | 1   | 6  |
| Solute carrier family 39 (Zinc transporter), member 7, isoform CRA_a OS=Homo sapiens GN=SLC39A7 PE=4 SV=1                          | A0A024RCX7_HUMAN (+4) | 50 kDa  | 0.74    | []                    | 1  | 1  | 1  | 1   | 1   | 5  |
| Solute carrier family 44, member 1, isoform CRA_a OS=Homo sapiens GN=SLC44A1 PE=4 SV=1                                             | A0A024R151_HUMAN (+1) | 73 kDa  | 0.018   | BRAC1 high, Naive low | 0  | 0  | 3  | 6   | 7   | 7  |
| Solute carrier family 44, member 2, isoform CRA_a OS=Homo sapiens GN=SLC44A2 PE=4 SV=1                                             | A0A024R7D2_HUMAN      | 80 kDa  | 0.14    | []                    | 1  | 0  | 3  | 4   | 5   | 4  |
| Sorbitol dehydrogenase OS=Homo sapiens GN=SORD PE=1 SV=4                                                                           | DHSO_HUMAN (+1)       | 38 kDa  | 0.026   | BRAC1 high, Naive low | 0  | 0  | 0  | 2   | 3   | 7  |
| Sorting nexin OS=Homo sapiens GN=SNX9 PE=1 SV=1                                                                                    | A0A087WYU1_HUMAN (+4) | 66 kDa  | 0.74    | []                    | 1  | 2  | 0  | 2   | 2   | 0  |
| Sorting nexin-5 OS=Homo sapiens GN=SNX5 PE=1 SV=1                                                                                  | SNX5_HUMAN            | 47 kDa  | 0.13    | []                    | 0  | 0  | 0  | 0   | 1   | 2  |
| Specifically androgen-regulated gene protein OS=Homo sapiens GN=SARG PE=1 SV=2                                                     | SARG_HUMAN            | 64 kDa  | 0.04    | BRAC1 high, Naive low | 0  | 0  | 0  | 2   | 3   | 1  |
| Spectrin alpha chain, non-erythrocytic 1 OS=Homo sapiens GN=SPTAN1 PE=1 SV=3                                                       | SPTN1_HUMAN           | 285 kDa | 0.031   | BRAC1 high, Naive low | 7  | 13 | 14 | 66  | 67  | 42 |
| Spectrin beta chain, non-erythrocytic 1 OS=Homo sapiens GN=SPTBN1 PE=1 SV=1                                                        | A0A087WUZ3_HUMAN (+2) | 275 kDa | 0.02    | BRAC1 high, Naive low | 4  | 9  | 11 | 40  | 48  | 33 |
| Spectrin beta chain, non-erythrocytic 2 OS=Homo sapiens GN=SPTBN2 PE=1 SV=3                                                        | SPTN2_HUMAN           | 271 kDa | 0.12    | []                    | 0  | 0  | 0  | 3   | 4   | 0  |
| Spermatogenesis-associated protein 5-like protein 1 OS=Homo sapiens GN=SPATA5L1 PE=1 SV=2                                          | SPA5L_HUMAN (+1)      | 81 kDa  | 0.37    | []                    | 0  | 0  | 0  | 0   | 0   | 2  |
| Sphingosine-1-phosphate lyase 1 OS=Homo sapiens GN=SGPL1 PE=1 SV=3                                                                 | SGPL1_HUMAN           | 64 kDa  | 0.081   | []                    | 0  | 0  | 0  | 1   | 4   | 9  |
| Splicing factor 3B subunit 1 OS=Homo sapiens GN=SF3B1 PE=1 SV=3                                                                    | SF3B1_HUMAN           | 146 kDa | 0.37    | []                    | 0  | 0  | 0  | 0   | 0   | 2  |
| Splicing factor 3B subunit 3 OS=Homo sapiens GN=SF3B3 PE=1 SV=4                                                                    | SF3B3_HUMAN (+2)      | 136 kDa | 0.37    | []                    | 0  | 0  | 0  | 0   | 0   | 2  |
| Splicing factor U2AF 35 kDa subunit OS=Homo sapiens GN=U2AF1 PE=1 SV=3                                                             | U2AF1_HUMAN (+1)      | 28 kDa  | 0.13    | []                    | 0  | 0  | 0  | 0   | 1   | 2  |
| Splicing factor U2AF 65 kDa subunit OS=Homo sapiens GN=U2AF2 PE=1 SV=4                                                             | U2AF2_HUMAN (+1)      | 54 kDa  | 0.37    | []                    | 0  | 0  | 0  | 0   | 0   | 2  |
| Splicing factor proline/glutamine-rich (Polypyrimidine tract binding protein associated) OS=Homo sapiens GN=SFPQ PE=2 SV=1         | Q86VG2_HUMAN (+2)     | 76 kDa  | 0.27    | []                    | 1  | 2  | 7  | 1   | 0   | 5  |
| Squalene monooxygenase OS=Homo sapiens GN=SQLE PE=1 SV=3                                                                           | ERG1_HUMAN (+1)       | 64 kDa  | 0.25    | []                    | 0  | 0  | 0  | 1   | 0   | 6  |
| Squalene synthase OS=Homo sapiens GN=FDFT1 PE=1 SV=1                                                                               | FDFT_HUMAN (+5)       | 48 kDa  | 0.13    | []                    | 0  | 0  | 0  | 0   | 1   | 2  |
| Staphylococcal nuclease domain-containing protein 1 OS=Homo sapiens GN=SND1 PE=1 SV=1                                              | SND1_HUMAN            | 102 kDa | 0.24    | []                    | 15 | 16 | 15 | 18  | 19  | 28 |
| Sterile alpha motif domain-containing protein 9 OS=Homo sapiens GN=SAMD9 PE=1 SV=1                                                 | SAMD9_HUMAN           | 184 kDa | 0.21    | []                    | 0  | 0  | 0  | 1   | 1   | 9  |
| Sterol-4-alpha-carboxylate 3-dehydrogenase, decarboxylating OS=Homo sapiens GN=NSDHL PE=1 SV=2                                     | NSDHL_HUMAN           | 42 kDa  | 0.2     | []                    | 0  | 0  | 3  | 2   | 4   | 5  |
| Stimulator of interferon genes protein OS=Homo sapiens GN=TMEM173 PE=1 SV=1                                                        | STING_HUMAN           | 42 kDa  | 0.0051  | BRAC1 low, Naive high | 2  | 2  | 2  | 0   | 0   | 1  |
| Stomatin-like protein 2, mitochondrial OS=Homo sapiens GN=STOML2 PE=1 SV=1                                                         | STML2_HUMAN           | 39 kDa  | 0.98    | []                    | 4  | 3  | 5  | 4   | 7   | 11 |
| Stromal cell-derived factor 2 OS=Homo sapiens GN=SDF2 PE=1 SV=2                                                                    | SDF2_HUMAN (+1)       | 23 kDa  | 0.37    | []                    | 0  | 0  | 0  | 0   | 0   | 2  |
| Stromal interaction molecule 1 OS=Homo sapiens GN=STIM1 PE=1 SV=3                                                                  | STIM1_HUMAN (+2)      | 77 kDa  | 0.97    | []                    | 0  | 2  | 1  | 0   | 0   | 6  |
| Structural maintenance of chromosomes protein 3 OS=Homo sapiens GN=SMC3 PE=1 SV=2                                                  | SMC3_HUMAN (+2)       | 142 kDa | 0.27    | []                    | 0  | 0  | 0  | 0   | 1   | 7  |
| Succinate dehydrogenase [ubiquinone] flavoprotein subunit, mitochondrial OS=Homo sapiens GN=SDHA PE=3 SV=1                         | A0A024QZ30_HUMAN (+1) | 73 kDa  | 0.025   | BRAC1 high, Naive low | 3  | 2  | 3  | 8   | 7   | 10 |
| cDNA FLJ37560 fis, clone BRCCOC2000333, highly similar to Succinate dehydrogenase (ubiquinone) flavoprotein subunit, mitochondrial | B3KT34_HUMAN          | 48 kDa  | 0.086   | []                    | 3  | 2  | 1  | 7   | 7   | 8  |
| Succinate dehydrogenase [ubiquinone] iron-sulfur subunit, mitochondrial OS=Homo sapiens GN=SDHB PE=1 SV=3                          | SDHB_HUMAN            | 32 kDa  | 0.86    | []                    | 1  | 0  | 0  | 0   | 0   | 2  |
| Succinyl-CoA ligase subunit beta OS=Homo sapiens GN=SUCLG2 PE=3 SV=1                                                               | A0A024R325_HUMAN (+1) | 47 kDa  | 0.12    | []                    | 3  | 2  | 2  | 2   | 2   | 0  |
| Succinyl-CoA:3-ketoacid coenzyme A transferase 1, mitochondrial OS=Homo sapiens GN=OXCT1 PE=1 SV=1                                 | SCOT1_HUMAN (+2)      | 56 kDa  | 0.17    | []                    | 0  | 1  | 3  | 0   | 0   | 0  |
| Sulfatase-modifying factor 2 OS=Homo sapiens GN=SUMF2 PE=1 SV=2                                                                    | SUMF2_HUMAN (+3)      | 34 kDa  | 0.89    | []                    | 0  | 1  | 1  | 0   | 1   | 2  |
| Sulphydryl oxidase OS=Homo sapiens GN=QSOX2 PE=1 SV=1                                                                              | A0A087X176_HUMAN (+1) | 77 kDa  | 0.036   | BRAC1 high, Naive low | 0  | 0  | 0  | 3   | 1   | 5  |
| Sulfide:quinone oxidoreductase, mitochondrial OS=Homo sapiens GN=SQRDL PE=1 SV=1                                                   | SQRD_HUMAN (+4)       | 50 kDa  | 0.00091 | BRAC1 low, Naive high | 2  | 2  | 4  | 0   | 0   | 0  |
| Sulfotransferase family cytosolic 2B member 1 OS=Homo sapiens GN=SULT2B1 PE=1 SV=2                                                 | ST2B1_HUMAN           | 41 kDa  | 0.15    | []                    | 0  | 0  | 0  | 0   | 2   | 5  |

|                                                                                              |                       |         |        |                       |    |    |    |    |    |    |
|----------------------------------------------------------------------------------------------|-----------------------|---------|--------|-----------------------|----|----|----|----|----|----|
| Sulfurtransferase OS=Homo sapiens PE=2 SV=1                                                  | B4DVZ4_HUMAN (+2)     | 28 kDa  | 0.1    | []                    | 1  | 0  | 0  | 2  | 2  | 3  |
| Superoxide dismutase [Mn], mitochondrial OS=Homo sapiens GN=SOD2 PE=1 SV=2                   | SODM_HUMAN (+2)       | 25 kDa  | 0.021  | BRAC1 low, Naive high | 7  | 4  | 6  | 0  | 0  | 1  |
| Suppressor of tumorigenicity 14 protein homolog OS=Homo sapiens PE=2 SV=1                    | B2RAF9_HUMAN (+1)     | 95 kDa  | 0.0092 | BRAC1 high, Naive low | 0  | 0  | 0  | 10 | 9  | 6  |
| Surfeit locus protein 4 OS=Homo sapiens GN=SURF4 PE=1 SV=3                                   | SURF4_HUMAN (+2)      | 30 kDa  | 0.63   | []                    | 1  | 1  | 8  | 0  | 1  | 9  |
| tr B7Z1G8 B7Z1G8_HUMAN Surfeit 4, isoform CRA_b OS=Homo sapiens GN=SURF4 PE=1 SV=1           | B7Z1G8_HUMAN          | ?       | 0.37   | []                    | 0  | 0  | 0  | 0  | 0  | 2  |
| Sushi domain-containing protein 2 OS=Homo sapiens GN=SUSD2 PE=1 SV=1                         | SUSD2_HUMAN           | 90 kDa  | 0.37   | []                    | 0  | 0  | 2  | 0  | 0  | 0  |
| Synaptogyrin OS=Homo sapiens GN=SYNGR2 PE=3 SV=1                                             | A0A024R8T9_HUMAN (+1) | 25 kDa  | 0.89   | []                    | 0  | 1  | 0  | 0  | 2  | 0  |
| Synaptophysin-like protein 1 OS=Homo sapiens GN=SYPL1 PE=1 SV=1                              | C9JYN0_HUMAN          | 25 kDa  | 0.5    | []                    | 1  | 2  | 2  | 1  | 2  | 4  |
| Synaptosomal-associated protein OS=Homo sapiens GN=SNAP23 PE=1 SV=1                          | A8K287_HUMAN (+1)     | 23 kDa  | 0.052  | []                    | 0  | 0  | 1  | 8  | 5  | 3  |
| Syndecan binding protein (Syntenin), isoform CRA_a OS=Homo sapiens GN=SDCBP PE=1 SV=1        | G5EA09_HUMAN          | 35 kDa  | 0.0049 | BRAC1 high, Naive low | 0  | 0  | 0  | 14 | 14 | 10 |
| Syndecan binding protein (Syntenin), isoform CRA_c OS=Homo sapiens GN=SDCBP PE=4 SV=1        | A0A024R7Z5_HUMAN (+1) | 32 kDa  | 0.01   | BRAC1 high, Naive low | 0  | 0  | 0  | 16 | 17 | 10 |
| Syndecan-1 OS=Homo sapiens GN=SDC1 PE=1 SV=3                                                 | SDC1_HUMAN            | 32 kDa  | 0.14   | []                    | 0  | 0  | 0  | 3  | 5  | 0  |
| Synembryn-A OS=Homo sapiens GN=RIC8A PE=1 SV=3                                               | RIC8A_HUMAN           | 60 kDa  | 0.23   | []                    | 0  | 0  | 0  | 0  | 1  | 5  |
| Syntaxin 4A (Placental), isoform CRA_a OS=Homo sapiens GN=STX4A PE=2 SV=1                    | B7Z425_HUMAN (+1)     | 25 kDa  | 0.77   | []                    | 0  | 1  | 3  | 1  | 4  | 2  |
| Syntaxin-3 OS=Homo sapiens GN=STX3 PE=1 SV=3                                                 | STX3_HUMAN (+5)       | 33 kDa  | 0.37   | []                    | 0  | 0  | 0  | 0  | 0  | 2  |
| Syntaxin-7 OS=Homo sapiens GN=STX7 PE=1 SV=4                                                 | STX7_HUMAN            | 30 kDa  | 0.14   | []                    | 3  | 4  | 2  | 3  | 3  | 1  |
| Syntaxin-binding protein 1 OS=Homo sapiens GN=STXB1 PE=1 SV=1                                | STXB1_HUMAN (+4)      | 68 kDa  | 0.12   | []                    | 1  | 0  | 2  | 0  | 0  | 0  |
| Syntaxin-binding protein 2 OS=Homo sapiens GN=STXBP2 PE=1 SV=1                               | A0A087WWS7_HUMAN (+4) | 65 kDa  | 0.077  | []                    | 0  | 1  | 1  | 2  | 2  | 4  |
| Syntaxin-binding protein 3 OS=Homo sapiens GN=STXBP3 PE=1 SV=2                               | STXB3_HUMAN           | 68 kDa  | 0.65   | []                    | 0  | 1  | 1  | 2  | 2  | 0  |
| T-complex protein 1 subunit alpha OS=Homo sapiens GN=TCP1 PE=1 SV=1                          | TCPA_HUMAN            | 60 kDa  | 0.029  | BRAC1 high, Naive low | 3  | 3  | 6  | 10 | 9  | 17 |
| T-complex protein 1 subunit beta OS=Homo sapiens GN=CCT2 PE=1 SV=4                           | TCPB_HUMAN (+1)       | 57 kDa  | 0.093  | []                    | 6  | 4  | 11 | 15 | 16 | 19 |
| T-complex protein 1 subunit delta OS=Homo sapiens PE=2 SV=1                                  | B7Z9L0_HUMAN (+1)     | 52 kDa  | 0.23   | []                    | 4  | 2  | 9  | 10 | 10 | 15 |
| T-complex protein 1 subunit epsilon OS=Homo sapiens GN=CCT5 PE=1 SV=1                        | TCPE_HUMAN (+1)       | 60 kDa  | 0.12   | []                    | 0  | 2  | 8  | 14 | 9  | 12 |
| T-complex protein 1 subunit gamma OS=Homo sapiens PE=2 SV=1                                  | B3KX11_HUMAN (+2)     | 58 kDa  | 0.33   | []                    | 2  | 2  | 7  | 7  | 7  | 9  |
| TAR DNA-binding protein 43 OS=Homo sapiens GN=TARDBP PE=1 SV=1                               | TADBP_HUMAN (+3)      | 45 kDa  | 0.87   | []                    | 0  | 0  | 2  | 0  | 0  | 4  |
| TBC1 domain family member 4 OS=Homo sapiens GN=TBC1D4 PE=1 SV=2                              | TBCD4_HUMAN (+1)      | 147 kDa | 0.37   | []                    | 0  | 0  | 0  | 0  | 0  | 2  |
| TBC1 domain family member 10B OS=Homo sapiens GN=TBC1D10B PE=1 SV=3                          | TB10B_HUMAN           | 87 kDa  | 0.053  | []                    | 0  | 0  | 0  | 4  | 4  | 1  |
| TELO2-interacting protein 1 homolog OS=Homo sapiens GN=TTI1 PE=1 SV=3                        | TTI1_HUMAN (+1)       | 122 kDa | 0.37   | []                    | 0  | 0  | 0  | 0  | 0  | 2  |
| TJP3 protein (Fragment) OS=Homo sapiens GN=TJP3 PE=2 SV=2                                    | Q2VPE5_HUMAN (+2)     | 101 kDa | 0.073  | []                    | 0  | 0  | 0  | 2  | 4  | 1  |
| TNF receptor-associated protein 1 variant (Fragment) OS=Homo sapiens PE=2 SV=1               | Q53G55_HUMAN          | 80 kDa  | 0.24   | []                    | 3  | 3  | 4  | 3  | 4  | 7  |
| TRAP1 protein (Fragment) OS=Homo sapiens GN=TRAP1 PE=2 SV=2                                  | Q9BV61_HUMAN          | 79 kDa  | 0.49   | []                    | 3  | 3  | 4  | 4  | 5  | 7  |
| TRIO and F-actin-binding protein OS=Homo sapiens GN=TRIOBP PE=1 SV=3                         | TARA_HUMAN            | 261 kDa | 0.0036 | BRAC1 low, Naive high | 1  | 2  | 3  | 0  | 0  | 0  |
| Talin-1 OS=Homo sapiens GN=TLN1 PE=1 SV=3                                                    | TLN1_HUMAN            | 270 kDa | 0.004  | BRAC1 low, Naive high | 26 | 39 | 49 | 26 | 28 | 15 |
| Tankyrase 1 binding protein 1, 182kDa, isoform CRA_a OS=Homo sapiens GN=TNKS1BP1 PE=4 SV=1   | A0A024R542_HUMAN (+1) | 182 kDa | 0.076  | []                    | 0  | 1  | 0  | 17 | 22 | 4  |
| Tapasin OS=Homo sapiens GN=TAPBP PE=1 SV=1                                                   | TPSN_HUMAN (+7)       | 48 kDa  | 0.86   | []                    | 0  | 1  | 1  | 0  | 0  | 3  |
| Tenascin OS=Homo sapiens GN=TNC PE=1 SV=3                                                    | TENA_HUMAN (+5)       | 241 kDa | 0.12   | []                    | 4  | 5  | 0  | 0  | 0  | 0  |
| Tensin-1 OS=Homo sapiens GN=TNS1 PE=1 SV=2                                                   | TENS1_HUMAN (+6)      | 186 kDa | 0.12   | []                    | 2  | 2  | 0  | 0  | 0  | 0  |
| Testis derived transcript (3 LIM domains) OS=Homo sapiens GN=TES PE=4 SV=1                   | A4D0U5_HUMAN (+4)     | 48 kDa  | 0.07   | []                    | 0  | 0  | 0  | 1  | 1  | 4  |
| Tetraspanin (Fragment) OS=Homo sapiens GN=TSPAN14 PE=1 SV=2                                  | A6NEP9_HUMAN (+1)     | 25 kDa  | 0.055  | []                    | 0  | 0  | 0  | 4  | 3  | 1  |
| Tetraspanin (Fragment) OS=Homo sapiens PE=2 SV=1                                             | Q53GA9_HUMAN (+1)     | 26 kDa  | 0.0011 | BRAC1 high, Naive low | 0  | 0  | 0  | 9  | 7  | 8  |
| Tetraspanin OS=Homo sapiens GN=CD9 PE=1 SV=1                                                 | A6NNI4_HUMAN (+3)     | 18 kDa  | 0.65   | []                    | 1  | 1  | 2  | 4  | 4  | 0  |
| Tetraspanin OS=Homo sapiens GN=CD81 PE=3 SV=1                                                | A0A024RCB7_HUMAN (+7) | 26 kDa  | 0.15   | []                    | 5  | 4  | 5  | 5  | 6  | 2  |
| Tetraspanin OS=Homo sapiens GN=CD151 PE=3 SV=1                                               | A0A024RCB3_HUMAN (+1) | 28 kDa  | 0.13   | []                    | 0  | 0  | 0  | 0  | 1  | 2  |
| Tetraspanin-15 (Fragment) OS=Homo sapiens GN=TSPAN15 PE=1 SV=1                               | H7C285_HUMAN (+1)     | 18 kDa  | 0.0068 | BRAC1 high, Naive low | 0  | 0  | 0  | 3  | 3  | 2  |
| Tetratricopeptide repeat protein 37 OS=Homo sapiens GN=TTC37 PE=1 SV=1                       | TTC37_HUMAN           | 175 kDa | 0.37   | []                    | 0  | 0  | 0  | 0  | 0  | 5  |
| Thioredoxin domain-containing protein 5 OS=Homo sapiens GN=TXNDC5 PE=1 SV=2                  | TXND5_HUMAN           | 48 kDa  | 0.0094 | BRAC1 low, Naive high | 4  | 5  | 6  | 2  | 1  | 6  |
| Thioredoxin interacting protein, isoform CRA_a OS=Homo sapiens GN=TXNIP PE=4 SV=1            | A0A024R4B7_HUMAN (+3) | 44 kDa  | 0.37   | []                    | 0  | 0  | 0  | 2  | 0  | 0  |
| Thioredoxin reductase 1, cytoplasmic OS=Homo sapiens GN=TXNRD1 PE=1 SV=3                     | TRXR1_HUMAN (+8)      | 71 kDa  | 0.19   | []                    | 0  | 3  | 7  | 0  | 0  | 2  |
| Thioredoxin-dependent peroxide reductase, mitochondrial OS=Homo sapiens GN=PRDX3 PE=1 SV=3   | PRDX3_HUMAN           | 28 kDa  | 0.85   | []                    | 1  | 2  | 4  | 3  | 3  | 6  |
| Thioredoxin-related transmembrane protein 1 OS=Homo sapiens GN=TMX1 PE=1 SV=1                | TMX1_HUMAN            | 32 kDa  | 0.082  | []                    | 1  | 1  | 2  | 0  | 1  | 2  |
| Thioredoxin-related transmembrane protein 2 OS=Homo sapiens GN=TMX2 PE=1 SV=1                | TMX2_HUMAN            | 34 kDa  | 0.0003 | BRAC1 high, Naive low | 0  | 0  | 0  | 3  | 3  | 5  |
| Thrombospondin-1 OS=Homo sapiens GN=THBS1 PE=1 SV=2                                          | TSP1_HUMAN (+1)       | 129 kDa | 0.0008 | BRAC1 low, Naive high | 10 | 16 | 15 | 0  | 0  | 0  |
| Thy-1 membrane glycoprotein OS=Homo sapiens GN=THY1 PE=1 SV=2                                | THY1_HUMAN (+4)       | 18 kDa  | 0.0013 | BRAC1 low, Naive high | 9  | 11 | 10 | 0  | 0  | 0  |
| Tight junction protein 2 (Zona occludens 2), isoform CRA_a OS=Homo sapiens GN=TJP2 PE=4 SV=1 | A0A024R233_HUMAN      | 134 kDa | 0.0028 | BRAC1 high, Naive low | 0  | 0  | 0  | 13 | 14 | 11 |
| Tight junction protein ZO-1 (Fragment) OS=Homo sapiens GN=TJP1 PE=2 SV=1                     | A9CQZ8_HUMAN (+2)     | 197 kDa | 0.076  | []                    | 1  | 1  | 6  | 19 | 17 | 8  |
| Tight junction protein ZO-1 OS=Homo sapiens GN=TJP1 PE=1 SV=1                                | A0A087X0K9_HUMAN (+1) | 188 kDa | 0.076  | []                    | 1  | 1  | 6  | 19 | 17 | 8  |
| Tissue alpha-L-fucosidase OS=Homo sapiens GN=FUCA1 PE=1 SV=4                                 | FUCO_HUMAN            | 54 kDa  | 0.23   | []                    | 0  | 0  | 0  | 0  | 1  | 5  |
| Tissue factor OS=Homo sapiens GN=F3 PE=1 SV=1                                                | TF_HUMAN (+2)         | 33 kDa  | 0.025  | BRAC1 low, Naive high | 1  | 3  | 2  | 0  | 0  | 0  |
| Toll-interacting protein OS=Homo sapiens GN=TOLLIP PE=1 SV=1                                 | F22ZV8_HUMAN (+4)     | 23 kDa  | 0.018  | BRAC1 high, Naive low | 0  | 0  | 0  | 2  | 2  | 1  |
| Torsin-1A-interacting protein 1 OS=Homo sapiens GN=TOR1AIP1 PE=1 SV=1                        | A0A0A0MSK5_HUMAN (+2) | 52 kDa  | 0.82   | []                    | 0  | 1  | 2  | 1  | 0  | 3  |
| Torsin-1A-interacting protein 2 OS=Homo sapiens GN=TOR1AIP2 PE=1 SV=1                        | TOIP2_HUMAN (+1)      | 51 kDa  | 0.12   | []                    | 1  | 0  | 2  | 0  | 0  | 0  |
| Trans-Golgi network integral membrane protein 2 OS=Homo sapiens GN=TGOLN2 PE=1 SV=2          | F8W8W7_HUMAN (+2)     | 51 kDa  | 0.05   | []                    | 0  | 2  | 2  | 5  | 4  | 7  |

|                                                                                                                                |                       |         |           |                       |    |    |    |    |    |     |
|--------------------------------------------------------------------------------------------------------------------------------|-----------------------|---------|-----------|-----------------------|----|----|----|----|----|-----|
| Transaldolase OS=Homo sapiens GN=TALDO1 PE=1 SV=1                                                                              | F2Z393_HUMAN (+1)     | 35 kDa  | 0.086     | []                    | 0  | 0  | 1  | 1  | 2  | 2   |
| Transcription factor p65 OS=Homo sapiens GN=RELA PE=1 SV=2                                                                     | TF65_HUMAN (+4)       | 60 kDa  | 0.13      | []                    | 0  | 0  | 0  | 0  | 1  | 2   |
| Transcriptional activator protein Pur-alpha OS=Homo sapiens GN=PURA PE=1 SV=2                                                  | PURA_HUMAN (+4)       | 35 kDa  | 0.072     | []                    | 3  | 2  | 2  | 1  | 1  | 2   |
| Transducin beta-like protein 2 OS=Homo sapiens GN=TBL2 PE=1 SV=1                                                               | TBL2_HUMAN (+4)       | 50 kDa  | 0.67      | []                    | 1  | 3  | 1  | 0  | 1  | 5   |
| Transgelin OS=Homo sapiens GN=TAGLN PE=1 SV=4                                                                                  | TAGL_HUMAN (+1)       | 23 kDa  | 0.034     | BRAC1 low, Naive high | 1  | 2  | 5  | 0  | 0  | 0   |
| Transgelin-2 OS=Homo sapiens GN=TAGLN2 PE=1 SV=3                                                                               | TAGL2_HUMAN (+1)      | 22 kDa  | 0.063     | []                    | 2  | 4  | 4  | 15 | 16 | 9   |
| Transient receptor potential cation channel subfamily M member 4 OS=Homo sapiens GN=TRPM4 PE=1 SV=1                            | TRPM4_HUMAN           | 134 kDa | 0.0058    | BRAC1 high, Naive low | 0  | 0  | 0  | 1  | 2  | 2   |
| Transitional endoplasmic reticulum ATPase OS=Homo sapiens GN=VCP PE=1 SV=4                                                     | TERA_HUMAN (+1)       | 89 kDa  | 0.0023    | BRAC1 low, Naive high | 9  | 11 | 17 | 11 | 13 | 15  |
| Translation initiation factor eIF-2B subunit delta OS=Homo sapiens GN=EIF2B4 PE=1 SV=2                                         | EI2BD_HUMAN (+4)      | 58 kDa  | 0.37      | []                    | 0  | 0  | 0  | 0  | 0  | 2   |
| Translocase of inner mitochondrial membrane 50 homolog (Yeast), isoform CRA_b OS=Homo sapiens GN=TIMM50 PE=4 SV=1              | A0A024R0M6_HUMAN (+2) | 50 kDa  | 0.017     | BRAC1 high, Naive low | 0  | 0  | 0  | 4  | 3  | 2   |
| Translocation protein SEC62 OS=Homo sapiens GN=SEC62 PE=1 SV=1                                                                 | SEC62_HUMAN           | 46 kDa  | 0.37      | []                    | 0  | 0  | 0  | 0  | 0  | 5   |
| Translocon-associated protein subunit delta OS=Homo sapiens GN=SSR4 PE=1 SV=1                                                  | SSRD_HUMAN            | 19 kDa  | 0.041     | BRAC1 low, Naive high | 2  | 2  | 3  | 2  | 3  | 2   |
| Transmembrane BAX inhibitor motif containing 1, isoform CRA_a OS=Homo sapiens GN=TMBIM1 PE=4 SV=1                              | A0A024R472_HUMAN (+9) | 35 kDa  | 0.67      | []                    | 1  | 0  | 2  | 3  | 2  | 1   |
| Transmembrane and coiled-coil domains 1, isoform CRA_a OS=Homo sapiens GN=TMCO1 PE=2 SV=1                                      | B7Z591_HUMAN (+3)     | 20 kDa  | 0.031     | BRAC1 high, Naive low | 0  | 0  | 0  | 2  | 1  | 1   |
| Transmembrane emp24 domain-containing protein 7 OS=Homo sapiens GN=TMED7 PE=1 SV=2                                             | TMED7_HUMAN           | 25 kDa  | 0.72      | []                    | 0  | 2  | 2  | 0  | 1  | 4   |
| Transmembrane emp24-like trafficking protein 10 (Yeast), isoform CRA_a OS=Homo sapiens GN=TMED10 PE=4 SV=1                     | A0A024R6I3_HUMAN (+2) | 25 kDa  | 0.58      | []                    | 0  | 2  | 1  | 1  | 0  | 2   |
| Transmembrane protein 2, isoform CRA_b OS=Homo sapiens GN=TMEM2 PE=4 SV=1                                                      | A0A024R229_HUMAN (+1) | 154 kDa | 0.12      | []                    | 0  | 0  | 0  | 4  | 4  | 0   |
| Transmembrane protein 43, isoform CRA_a OS=Homo sapiens GN=TMEM43 PE=4 SV=1                                                    | A0A024R2F9_HUMAN (+1) | 45 kDa  | 0.01      | BRAC1 low, Naive high | 6  | 6  | 5  | 1  | 1  | 2   |
| Transmembrane protein 51, isoform CRA_b OS=Homo sapiens GN=TMEM51 PE=4 SV=1                                                    | A0A024QZ97_HUMAN (+1) | 28 kDa  | 0.0014    | BRAC1 high, Naive low | 0  | 0  | 0  | 3  | 2  | 3   |
| Transmembrane protein 119 OS=Homo sapiens GN=TMEM119 PE=1 SV=1                                                                 | TM119_HUMAN (+1)      | 29 kDa  | 0.014     | BRAC1 low, Naive high | 1  | 2  | 4  | 0  | 0  | 0   |
| Transmembrane protein 165 OS=Homo sapiens GN=TMEM165 PE=1 SV=1                                                                 | TM165_HUMAN           | 35 kDa  | 0.038     | BRAC1 low, Naive high | 2  | 3  | 2  | 2  | 1  | 1   |
| Transmembrane protein 214 OS=Homo sapiens GN=TMEM214 PE=1 SV=2                                                                 | TM214_HUMAN (+1)      | 77 kDa  | 0.5       | []                    | 0  | 2  | 0  | 0  | 0  | 1   |
| Transmembrane protein 238 OS=Homo sapiens GN=TMEM238 PE=1 SV=1                                                                 | TM238_HUMAN           | 18 kDa  | 0.19      | []                    | 0  | 0  | 0  | 2  | 0  | 1   |
| Transporter 2, ATP-binding cassette, sub-family B isoform 1 variant (Fragment) OS=Homo sapiens PE=2 SV=1                       | Q59H06_HUMAN (+1)     | 78 kDa  | 0.0078    | BRAC1 low, Naive high | 1  | 2  | 3  | 0  | 0  | 1   |
| Transporter OS=Homo sapiens GN=SLC6A6 PE=3 SV=1                                                                                | A0A024R2N0_HUMAN (+5) | 70 kDa  | 0.16      | []                    | 0  | 0  | 0  | 1  | 2  | 0   |
| Transportin 3, isoform CRA_b OS=Homo sapiens GN=TNPO3 PE=4 SV=1                                                                | A0A024R794_HUMAN (+2) | 104 kDa | 0.23      | []                    | 0  | 0  | 0  | 2  | 0  | 10  |
| Transportin-1 OS=Homo sapiens GN=TNPO1 PE=1 SV=2                                                                               | TNPO1_HUMAN (+1)      | 102 kDa | 0.27      | []                    | 1  | 1  | 2  | 0  | 1  | 3   |
| tr A0A024R7F7 A0A024R7F7_HUMAN Transportin 2 (Importin 3, karyopherin beta 2b), isoform...                                     | A0A024R7F7_HUMAN (+2) | ?       | 0.37      | []                    | 0  | 0  | 0  | 0  | 0  | 2   |
| Trifunctional enzyme subunit beta, mitochondrial OS=Homo sapiens GN=HADHB PE=1 SV=3                                            | ECHB_HUMAN            | 51 kDa  | 0.24      | []                    | 1  | 1  | 7  | 0  | 0  | 3   |
| Trifunctional purine biosynthetic protein adenosine-3 OS=Homo sapiens GN=GART PE=1 SV=1                                        | PUR2_HUMAN (+2)       | 108 kDa | 0.31      | []                    | 0  | 0  | 1  | 1  | 1  | 16  |
| Trinucleotide repeat containing 5, isoform CRA_g OS=Homo sapiens GN=TNRC5 PE=4 SV=1                                            | A0A024RCZ2_HUMAN (+2) | 17 kDa  | 0.13      | []                    | 0  | 0  | 0  | 1  | 0  | 2   |
| Triosephosphate isomerase (Fragment) OS=Homo sapiens PE=2 SV=1                                                                 | Q53HE2_HUMAN (+2)     | 27 kDa  | 0.2       | []                    | 4  | 2  | 8  | 11 | 9  | 13  |
| Tripartite motif-containing 29, isoform CRA_a OS=Homo sapiens GN=TRIM29 PE=4 SV=1                                              | A0A024R3J1_HUMAN (+2) | 66 kDa  | 0.042     | BRAC1 high, Naive low | 0  | 0  | 0  | 3  | 2  | 1   |
| Tripeptidyl-peptidase 1 OS=Homo sapiens GN=TPP1 PE=1 SV=1                                                                      | A0A0C4DGZ9_HUMAN (+5) | 60 kDa  | 0.011     | BRAC1 low, Naive high | 6  | 5  | 6  | 1  | 1  | 4   |
| Tripeptidyl-peptidase 2 OS=Homo sapiens GN=TPP2 PE=1 SV=4                                                                      | TPP2_HUMAN (+2)       | 138 kDa | 0.55      | []                    | 0  | 0  | 2  | 0  | 0  | 1   |
| Trophoblast glycoprotein OS=Homo sapiens GN=TPBG PE=1 SV=1                                                                     | TPBG_HUMAN            | 46 kDa  | 0.018     | BRAC1 low, Naive high | 3  | 5  | 3  | 1  | 1  | 1   |
| Epididymis secretory protein Li 265 OS=Homo sapiens GN=HEL-S-265 PE=2 SV=1                                                     | A0A0K0K1I0_HUMAN (+3) | 33 kDa  | 0.00054   | BRAC1 low, Naive high | 11 | 12 | 13 | 0  | 0  | 0   |
| Epididymis secretory protein Li 273 OS=Homo sapiens GN=HEL-S-273 PE=2 SV=1                                                     | V9HW25_HUMAN          | 33 kDa  | 0.0036    | BRAC1 low, Naive high | 14 | 14 | 13 | 0  | 0  | 0   |
| Tropomyosin 1 (Alpha), isoform CRA_a OS=Homo sapiens GN=TPM1 PE=3 SV=1                                                         | A0A024R5W6_HUMAN      | 33 kDa  | 0.0008    | BRAC1 low, Naive high | 7  | 8  | 8  | 0  | 0  | 0   |
| Tropomyosin alpha-1 chain OS=Homo sapiens GN=TPM1 PE=1 SV=1                                                                    | B7Z596_HUMAN (+6)     | 32 kDa  | 0.072     | []                    | 7  | 8  | 4  | 5  | 3  | 0   |
| cDNA FLJ57036, highly similar to Homo sapiens tropomyosin 2 (beta) (TPM2), transcript variant 2, mRNA OS=Homo sapiens PE=2 SV= | B4E3P1_HUMAN          | 34 kDa  | < 0.00010 | BRAC1 low, Naive high | 6  | 8  | 9  | 0  | 0  | 0   |
| Tropomyosin alpha-4 chain OS=Homo sapiens GN=TPM4 PE=1 SV=3                                                                    | TPM4_HUMAN (+1)       | 29 kDa  | 0.014     | BRAC1 low, Naive high | 13 | 13 | 11 | 5  | 5  | 2   |
| Truncated nucleolar phosphoprotein B23 OS=Homo sapiens GN=NPM1 PE=2 SV=1                                                       | A4ZU86_HUMAN (+1)     | 30 kDa  | 0.35      | []                    | 0  | 0  | 2  | 3  | 1  | 2   |
| Trypsin-2 OS=Homo sapiens GN=PRSS2 PE=1 SV=1                                                                                   | TRY2_HUMAN (+10)      | 26 kDa  | 0.37      | []                    | 0  | 0  | 0  | 0  | 0  | 2   |
| Tryptophan--tRNA ligase, cytoplasmic OS=Homo sapiens GN=WARS PE=1 SV=2                                                         | SYWC_HUMAN (+1)       | 53 kDa  | 0.38      | []                    | 0  | 0  | 1  | 0  | 1  | 5   |
| Tubulin alpha-1A chain OS=Homo sapiens GN=TUBA1A PE=1 SV=1                                                                     | TBA1A_HUMAN           | 50 kDa  | 0.69      | []                    | 26 | 28 | 36 | 38 | 33 | 75  |
| Tubulin alpha-4A chain OS=Homo sapiens GN=TUBA4A PE=1 SV=1                                                                     | TBA4A_HUMAN           | 50 kDa  | 0.17      | []                    | 33 | 36 | 32 | 67 | 62 | 117 |
| cDNA FLJ55956, highly similar to Tubulin alpha-6 chain OS=Homo sapiens PE=2 SV=1                                               | B7Z1K5_HUMAN (+3)     | 58 kDa  | 0.19      | []                    | 37 | 40 | 36 | 71 | 70 | 128 |
| Tubulin gamma-1 chain OS=Homo sapiens GN=TUBG1 PE=1 SV=2                                                                       | TBG1_HUMAN (+1)       | 51 kDa  | 0.37      | []                    | 0  | 0  | 0  | 0  | 0  | 2   |
| Tubulin polymerization-promoting protein family member 3 OS=Homo sapiens GN=TPPP3 PE=1 SV=1                                    | TPPP3_HUMAN (+1)      | 19 kDa  | 0.37      | []                    | 0  | 0  | 0  | 0  | 2  | 0   |
| Tubulin--tyrosine ligase-like protein 12 OS=Homo sapiens GN=TLL12 PE=1 SV=2                                                    | TLL12_HUMAN (+1)      | 74 kDa  | 0.37      | []                    | 0  | 0  | 0  | 0  | 0  | 5   |
| Tubulin-specific chaperone D OS=Homo sapiens GN=TBDC PE=1 SV=2                                                                 | TBDC_HUMAN (+1)       | 133 kDa | 0.37      | []                    | 0  | 0  | 0  | 0  | 0  | 3   |
| Tumor necrosis factor alpha-induced protein 2 OS=Homo sapiens GN=TNFAIP2 PE=2 SV=2                                             | TNAP2_HUMAN           | 73 kDa  | 0.0038    | BRAC1 high, Naive low | 0  | 0  | 0  | 3  | 4  | 7   |
| Tumor protein D54 OS=Homo sapiens GN=TPD52L2 PE=1 SV=1                                                                         | A0A087WYR3_HUMAN (+2) | 24 kDa  | 0.35      | []                    | 1  | 1  | 1  | 1  | 3  | 4   |
| Tumor susceptibility gene 101 protein OS=Homo sapiens GN=TSG101 PE=1 SV=1                                                      | F5H442_HUMAN (+1)     | 41 kDa  | 0.19      | []                    | 0  | 0  | 1  | 1  | 2  | 1   |
| Tumor-associated calcium signal transducer 2 OS=Homo sapiens GN=TACSTD2 PE=1 SV=3                                              | TACD2_HUMAN           | 36 kDa  | 0.16      | []                    | 0  | 0  | 0  | 2  | 1  | 0   |
| Twinfilin-1 OS=Homo sapiens GN=TWF1 PE=1 SV=3                                                                                  | TWF1_HUMAN            | 40 kDa  | 0.37      | []                    | 0  | 0  | 2  | 0  | 0  | 0   |
| Twinfilin-2 OS=Homo sapiens GN=TWF2 PE=1 SV=1                                                                                  | D6RG15_HUMAN (+1)     | 29 kDa  | 0.21      | []                    | 0  | 0  | 2  | 1  | 3  | 4   |
| Type I inositol 1,4,5-trisphosphate 5-phosphatase OS=Homo sapiens GN=INPP5A PE=1 SV=1                                          | I5P1_HUMAN (+2)       | 48 kDa  | 0.48      | []                    | 0  | 0  | 3  | 0  | 0  | 1   |
| Tyrosine--tRNA ligase, cytoplasmic OS=Homo sapiens GN=YARS PE=1 SV=4                                                           | SYYC_HUMAN            | 59 kDa  | 0.094     | []                    | 0  | 0  | 0  | 1  | 4  | 10  |
| Tyrosine--tRNA ligase, mitochondrial OS=Homo sapiens GN=YARS2 PE=1 SV=2                                                        | SYYM_HUMAN (+1)       | 53 kDa  | 0.37      | []                    | 0  | 0  | 0  | 0  | 0  | 2   |
| Tyrosine-protein kinase CSK OS=Homo sapiens GN=CSK PE=1 SV=1                                                                   | CSK_HUMAN (+5)        | 51 kDa  | 0.13      | []                    | 0  | 0  | 0  | 0  | 1  | 2   |

|                                                                                                                                        |                       |         |        |                       |    |    |    |      |     |    |
|----------------------------------------------------------------------------------------------------------------------------------------|-----------------------|---------|--------|-----------------------|----|----|----|------|-----|----|
| Tyrosine-protein kinase OS=Homo sapiens GN=JAK1 PE=2 SV=1                                                                              | A0A0A0N0M2_HUMAN (+1) | 133 kDa | 0.16   | []                    | 0  | 0  | 0  | 1    | 2   | 0  |
| Tyrosine-protein kinase OS=Homo sapiens PE=2 SV=1                                                                                      | B2RA70_HUMAN (+2)     | 61 kDa  | 0.056  | []                    | 0  | 2  | 0  | 4    | 4   | 5  |
| Tyrosine-protein kinase transmembrane receptor OS=Homo sapiens GN=ROR1 PE=1 SV=1                                                       | A0A0A0MTJ5_HUMAN (+2) | 98 kDa  | 0.13   | []                    | 0  | 0  | 0  | 3    | 3   | 0  |
| Tyrosine-protein phosphatase non-receptor type 6 OS=Homo sapiens GN=PTPN6 PE=1 SV=1                                                    | PTN6_HUMAN (+8)       | 68 kDa  | 0.37   | []                    | 0  | 0  | 0  | 0    | 0   | 2  |
| Tyrosine-protein phosphatase non-receptor type substrate 1 OS=Homo sapiens GN=SIRPA PE=1 SV=2                                          | SHPS1_HUMAN (+2)      | 55 kDa  | 0.13   | []                    | 0  | 1  | 2  | 0    | 0   | 0  |
| UBX domain-containing protein 6 OS=Homo sapiens GN=UBXN6 PE=1 SV=1                                                                     | UBXN6_HUMAN (+1)      | 50 kDa  | 0.37   | []                    | 0  | 0  | 0  | 0    | 0   | 2  |
| UDP-N-acetylglucosamine-peptide N-acetylglucosaminyltransferase 110 kDa subunit OS=Homo sapiens GN=OGT PE=1 SV=3                       | OGT1_HUMAN            | 117 kDa | 0.37   | []                    | 0  | 0  | 0  | 0    | 0   | 2  |
| UDP-glucose 4-epimerase OS=Homo sapiens GN=GALE PE=1 SV=2                                                                              | GALE_HUMAN            | 38 kDa  | 0.1    | []                    | 0  | 0  | 0  | 2    | 1   | 7  |
| UDP-glucose 6-dehydrogenase OS=Homo sapiens GN=UGDH PE=1 SV=1                                                                          | UGDH_HUMAN            | 55 kDa  | 0.56   | []                    | 2  | 3  | 6  | 5    | 4   | 16 |
| UDP-glucose:glycoprotein glucosyltransferase 1 OS=Homo sapiens GN=UGGT1 PE=1 SV=3                                                      | UGGG1_HUMAN           | 177 kDa | 0.93   | []                    | 2  | 5  | 7  | 1    | 7   | 15 |
| UDP-glucuronosyltransferase OS=Homo sapiens GN=UGT1A8 PE=2 SV=1                                                                        | Q5DSZ6_HUMAN (+1)     | 60 kDa  | 0.19   | []                    | 0  | 0  | 0  | 0    | 5   | 17 |
| UDP-glucuronosyltransferase OS=Homo sapiens GN=UGT1A9 PE=2 SV=1                                                                        | Q5DSZ5_HUMAN (+1)     | 60 kDa  | 0.15   | []                    | 0  | 0  | 0  | 0    | 5   | 12 |
| UDP-glucuronosyltransferase OS=Homo sapiens GN=UGT1A10 PE=2 SV=1                                                                       | Q5DT02_HUMAN (+1)     | 60 kDa  | 0.078  | []                    | 0  | 0  | 0  | 5    | 6   | 23 |
| UMP-CMP kinase OS=Homo sapiens GN=CMPK1 PE=1 SV=3                                                                                      | KCY_HUMAN (+2)        | 22 kDa  | 0.21   | []                    | 0  | 0  | 0  | 0    | 1   | 4  |
| UPF1 regulator of nonsense transcripts homolog (Yeast), isoform CRA_b OS=Homo sapiens GN=UPF1 PE=4 SV=1                                | A0A024R7L5_HUMAN (+2) | 123 kDa | 0.3    | []                    | 0  | 0  | 0  | 1    | 0   | 10 |
| UPF0568 protein C14orf166 OS=Homo sapiens GN=C14orf166 PE=1 SV=1                                                                       | CN166_HUMAN (+2)      | 28 kDa  | 0.31   | []                    | 1  | 0  | 3  | 0    | 0   | 2  |
| UTP--glucose-1-phosphate uridylyltransferase OS=Homo sapiens GN=UGP2 PE=1 SV=1                                                         | A0A087WYS1_HUMAN (+4) | 57 kDa  | 0.44   | []                    | 0  | 1  | 8  | 0    | 0   | 4  |
| Ubiquitin carboxyl-terminal hydrolase 5 OS=Homo sapiens GN=USP5 PE=1 SV=2                                                              | UBP5_HUMAN            | 96 kDa  | 0.1    | []                    | 1  | 1  | 1  | 4    | 3   | 11 |
| Ubiquitin carboxyl-terminal hydrolase 7 OS=Homo sapiens GN=USP7 PE=1 SV=2                                                              | UBP7_HUMAN (+3)       | 128 kDa | 0.37   | []                    | 0  | 0  | 0  | 0    | 0   | 2  |
| Ubiquitin carboxyl-terminal hydrolase 8 OS=Homo sapiens GN=USP8 PE=1 SV=1                                                              | UBP8_HUMAN (+3)       | 128 kDa | 0.37   | []                    | 0  | 0  | 0  | 0    | 0   | 2  |
| Ubiquitin carboxyl-terminal hydrolase 46 OS=Homo sapiens GN=USP46 PE=1 SV=1                                                            | H7BZK6_HUMAN (+2)     | 40 kDa  | 0.16   | []                    | 0  | 0  | 0  | 1    | 2   | 0  |
| Ubiquitin carboxyl-terminal hydrolase isozyme L3 OS=Homo sapiens GN=UCHL3 PE=1 SV=1                                                    | UCHL3_HUMAN           | 26 kDa  | 0.11   | []                    | 0  | 0  | 0  | 1    | 1   | 5  |
| Ubiquitin carboxyl-terminal hydrolase isozyme L5 OS=Homo sapiens GN=UCHL5 PE=1 SV=3                                                    | UCHL5_HUMAN (+3)      | 38 kDa  | 0.37   | []                    | 0  | 0  | 0  | 0    | 0   | 2  |
| Ubiquitin conjugation factor E4 A OS=Homo sapiens GN=UBE4A PE=1 SV=2                                                                   | UBE4A_HUMAN (+1)      | 123 kDa | 0.37   | []                    | 0  | 0  | 0  | 0    | 0   | 3  |
| Ubiquitin specific peptidase 14 (TRNA-guanine transglycosylase), isoform CRA_a OS=Homo sapiens GN=USP14 PE=4 SV=1                      | D3DUG9_HUMAN (+1)     | 53 kDa  | 0.19   | []                    | 0  | 0  | 2  | 2    | 2   | 9  |
| Ubiquitin-activating enzyme E1 (A159T and BN75 temperature sensitivity complementing), isoform CRA_a OS=Homo sapiens GN=UBA1 PE=1 SV=1 | A0A024R1A3_HUMAN (+1) | 118 kDa | 0.31   | []                    | 3  | 6  | 12 | 11   | 12  | 33 |
| Ubiquitin-conjugating enzyme E2 N OS=Homo sapiens GN=UBE2N PE=1 SV=1                                                                   | UBE2N_HUMAN (+2)      | 17 kDa  | 0.12   | []                    | 0  | 0  | 0  | 2    | 2   | 0  |
| Ubiquitin-like 3, isoform CRA_a OS=Homo sapiens GN=UBL3 PE=4 SV=1                                                                      | A0A024RDP0_HUMAN (+1) | 13 kDa  | 0.16   | []                    | 0  | 0  | 0  | 2    | 1   | 0  |
| Ubiquitin-like modifier-activating enzyme 6 OS=Homo sapiens GN=UBA6 PE=1 SV=1                                                          | UBA6_HUMAN (+2)       | 118 kDa | 0.37   | []                    | 0  | 0  | 0  | 0    | 0   | 7  |
| Ubiquitin-like protein ISG15 (Fragment) OS=Homo sapiens GN=ISG15 PE=1 SV=4                                                             | A0A096LNZ9_HUMAN (+2) | 16 kDa  | 0.96   | []                    | 1  | 0  | 5  | 3    | 3   | 3  |
| Ufm1-specific protease 2 OS=Homo sapiens GN=UFSP2 PE=1 SV=3                                                                            | UFSP2_HUMAN (+1)      | 53 kDa  | 0.37   | []                    | 0  | 0  | 0  | 0    | 2   | 0  |
| Uncharacterized protein (Fragment) OS=Homo sapiens PE=1 SV=1                                                                           | F8W031_HUMAN          | 29 kDa  | 0.94   | []                    | 1  | 1  | 0  | 2    | 1   | 1  |
| Uncharacterized protein KIAA1522 OS=Homo sapiens GN=KIAA1522 PE=1 SV=2                                                                 | K1522_HUMAN           | 107 kDa | 0.02   | BRAC1 high, Naive low | 0  | 0  | 0  | 9    | 11  | 5  |
| Uncharacterized protein OS=Homo sapiens PE=2 SV=1                                                                                      | B4DLN1_HUMAN          | 48 kDa  | 0.18   | []                    | 1  | 0  | 0  | 3    | 1   | 3  |
| Uncharacterized protein OS=Homo sapiens PE=2 SV=1                                                                                      | B7ZL84_HUMAN (+3)     | 69 kDa  | 0.13   | []                    | 0  | 0  | 0  | 3    | 2   | 0  |
| Myosin IC, isoform CRA_a OS=Homo sapiens GN=MYO1C PE=4 SV=1                                                                            | D3DTH7_HUMAN          | 99 kDa  | 0.13   | []                    | 20 | 25 | 26 | 62   | 68  | 49 |
| Unconventional myosin-Ic OS=Homo sapiens GN=MYO1C PE=1 SV=4                                                                            | MYO1C_HUMAN           | 122 kDa | 0.074  | []                    | 29 | 37 | 37 | 108  | 110 | 81 |
| Unconventional myosin-Id OS=Homo sapiens GN=MYO1D PE=1 SV=2                                                                            | MYO1D_HUMAN           | 116 kDa | 0.049  | BRAC1 high, Naive low | 1  | 1  | 2  | 0.26 | 24  | 9  |
| Unconventional myosin-Ie OS=Homo sapiens GN=MYO1E PE=1 SV=2                                                                            | MYO1E_HUMAN (+1)      | 127 kDa | 0.0027 | BRAC1 high, Naive low | 0  | 0  | 0  | 1    | 1   | 2  |
| Unconventional myosin-VI OS=Homo sapiens GN=MYO6 PE=1 SV=1                                                                             | A0A0A0MRM8_HUMAN      | 145 kDa | 0.002  | BRAC1 high, Naive low | 0  | 0  | 2  | 19   | 16  | 32 |
| Uridine 5'-monophosphate synthase OS=Homo sapiens GN=UMPS PE=1 SV=1                                                                    | UMPS_HUMAN (+2)       | 52 kDa  | 0.37   | []                    | 0  | 0  | 0  | 0    | 0   | 4  |
| Utrophin OS=Homo sapiens GN=UTRN PE=1 SV=2                                                                                             | UTRO_HUMAN            | 394 kDa | 0.35   | []                    | 7  | 9  | 1  | 32   | 26  | 4  |
| Uveal autoantigen with coiled-coil domains and ankyrin repeats OS=Homo sapiens GN=UACA PE=2 SV=1                                       | B7ZKM6_HUMAN (+2)     | 163 kDa | 0.49   | []                    | 1  | 1  | 1  | 2    | 1   | 1  |
| V-ral simian leukemia viral oncogene homolog B (Ras related GTP binding protein), isoform CRA_a OS=Homo sapiens GN=RALB PE=4 SV=1      | A0A024RAG3_HUMAN (+2) | 23 kDa  | 0.027  | BRAC1 high, Naive low | 0  | 1  | 4  | 10   | 11  | 8  |
| V-set and immunoglobulin domain-containing protein 2 OS=Homo sapiens GN=VSI2 PE=1 SV=1                                                 | VSI2_HUMAN            | 34 kDa  | 0.14   | []                    | 0  | 0  | 0  | 3    | 5   | 0  |
| V-set and immunoglobulin domain-containing protein 10-like OS=Homo sapiens GN=VSI10L PE=2 SV=2                                         | VSI10L_HUMAN          | 92 kDa  | 0.0003 | BRAC1 high, Naive low | 0  | 0  | 0  | 3    | 3   | 5  |
| V-type proton ATPase catalytic subunit A OS=Homo sapiens GN=ATP6V1A PE=1 SV=2                                                          | VATA_HUMAN            | 68 kDa  | 0.51   | []                    | 0  | 2  | 4  | 0    | 0   | 5  |
| V-type proton ATPase subunit B, brain isoform OS=Homo sapiens GN=ATP6V1B2 PE=1 SV=3                                                    | VATB2_HUMAN           | 57 kDa  | 0.092  | []                    | 2  | 1  | 1  | 0    | 0   | 1  |
| V-type proton ATPase subunit E 1 (Fragment) OS=Homo sapiens GN=ATP6V1E1 PE=1 SV=1                                                      | C9J8H1_HUMAN (+2)     | 24 kDa  | 0.46   | []                    | 2  | 0  | 2  | 1    | 1   | 2  |
| V-type proton ATPase subunit H OS=Homo sapiens GN=ATP6V1H PE=1 SV=1                                                                    | VATH_HUMAN (+5)       | 56 kDa  | 0.35   | []                    | 0  | 1  | 3  | 0    | 0   | 2  |
| V-type proton ATPase subunit a OS=Homo sapiens GN=TCIRG1 PE=3 SV=1                                                                     | A0A024R5E5_HUMAN (+1) | 93 kDa  | 0.0038 | BRAC1 low, Naive high | 3  | 4  | 3  | 0    | 0   | 0  |
| VAMP3 protein OS=Homo sapiens GN=VAMP3 PE=2 SV=1                                                                                       | Q6FGG2_HUMAN (+1)     | 11 kDa  | 0.13   | []                    | 3  | 4  | 1  | 2    | 1   | 1  |
| VAMP (Vesicle-associated membrane protein)-associated protein B and C OS=Homo sapiens GN=VAPB PE=1 SV=1                                | Q53XM7_HUMAN (+1)     | 27 kDa  | 0.62   | []                    | 0  | 1  | 2  | 1    | 2   | 3  |
| Vacuolar protein sorting 4A (Yeast), isoform CRA_c OS=Homo sapiens GN=VPS4A PE=3 SV=1                                                  | A0A024R705_HUMAN (+1) | 49 kDa  | 0.17   | []                    | 0  | 0  | 0  | 1    | 0   | 3  |
| Vacuolar protein sorting 4B (Yeast), isoform CRA_a OS=Homo sapiens GN=VPS4B PE=3 SV=1                                                  | A0A024R2C5_HUMAN (+3) | 49 kDa  | 0.17   | []                    | 0  | 0  | 0  | 1    | 0   | 3  |
| Vacuolar protein sorting-associated protein 26A OS=Homo sapiens GN=VPS26A PE=1 SV=2                                                    | VP26A_HUMAN           | 38 kDa  | 0.67   | []                    | 0  | 0  | 2  | 1    | 1   | 2  |
| Vacuolar protein sorting-associated protein 35 OS=Homo sapiens GN=VPS35 PE=1 SV=2                                                      | VPS35_HUMAN           | 92 kDa  | 0.62   | []                    | 0  | 3  | 7  | 3    | 4   | 16 |
| Vacuolar protein sorting-associated protein 37B OS=Homo sapiens GN=VPS37B PE=1 SV=1                                                    | VP37B_HUMAN (+2)      | 31 kDa  | 0.19   | []                    | 0  | 0  | 0  | 0    | 4   | 2  |
| Vacuolar protein sorting-associated protein 45 OS=Homo sapiens GN=VPS45 PE=1 SV=1                                                      | A0A087WU65_HUMAN (+3) | 51 kDa  | 0.0027 | BRAC1 high, Naive low | 0  | 0  | 0  | 1    | 1   | 2  |
| Vacuolar protein sorting-associated protein 51 homolog OS=Homo sapiens GN=VPS51 PE=1 SV=2                                              | VPS51_HUMAN           | 86 kDa  | 0.13   | []                    | 0  | 0  | 0  | 0    | 1   | 2  |
| Valyl-tRNA synthetase, isoform CRA_a OS=Homo sapiens GN=VARS PE=3 SV=1                                                                 | A0A024RCN6_HUMAN (+1) | 140 kDa | 0.059  | []                    | 0  | 1  | 0  | 5    | 4   | 15 |
| Vasodilator-stimulated phosphoprotein, isoform CRA_a OS=Homo sapiens GN=VASP PE=4 SV=1                                                 | A0A024ROV4_HUMAN (+1) | 40 kDa  | 0.038  | BRAC1 high, Naive low | 3  | 3  | 7  | 24   | 26  | 15 |

|                                                                                                                                                                  |                       |         |        |                       |    |    |    |    |    |    |
|------------------------------------------------------------------------------------------------------------------------------------------------------------------|-----------------------|---------|--------|-----------------------|----|----|----|----|----|----|
| Vasorin OS=Homo sapiens GN=VASN PE=1 SV=1                                                                                                                        | VASN_HUMAN            | 72 kDa  | 0.12   | []                    | 1  | 0  | 2  | 0  | 0  | 0  |
| Very long-chain specific acyl-CoA dehydrogenase, mitochondrial OS=Homo sapiens GN=ACADVL PE=1 SV=1                                                               | ACADV_HUMAN (+1)      | 70 kDa  | 0.032  | BRAC1 low, Naive high | 10 | 12 | 11 | 8  | 5  | 15 |
| Very-long-chain (3R)-3-hydroxyacyl-CoA dehydratase 3 OS=Homo sapiens GN=HACD3 PE=1 SV=2                                                                          | HACD3_HUMAN           | 43 kDa  | 0.18   | []                    | 0  | 1  | 3  | 3  | 5  | 4  |
| Very-long-chain enoyl-CoA reductase OS=Homo sapiens GN=TECR PE=1 SV=1                                                                                            | TECR_HUMAN (+2)       | 36 kDa  | 0.5    | []                    | 0  | 0  | 1  | 0  | 2  | 1  |
| Vesicle amine transport protein 1 homolog (T californica), isoform CRA_a OS=Homo sapiens GN=VAT1 PE=4 SV=1                                                       | A0A024R1Z6_HUMAN (+1) | 42 kDa  | 0.021  | BRAC1 low, Naive high | 6  | 8  | 5  | 2  | 1  | 4  |
| Vesicle docking protein p115, isoform CRA_a OS=Homo sapiens GN=VDP PE=4 SV=1                                                                                     | A0A024RDG1_HUMAN (+1) | 108 kDa | 0.76   | []                    | 1  | 1  | 2  | 1  | 0  | 5  |
| Vesicle transport protein GOT1B OS=Homo sapiens GN=GOLT1B PE=1 SV=1                                                                                              | GOT1B_HUMAN (+2)      | 15 kDa  | 0.19   | []                    | 0  | 0  | 0  | 0  | 2  | 1  |
| Vesicle-trafficking protein SEC22b OS=Homo sapiens GN=SEC22B PE=1 SV=4                                                                                           | SC22B_HUMAN           | 25 kDa  | 0.046  | BRAC1 low, Naive high | 1  | 1  | 2  | 1  | 1  | 2  |
| Villin 1 variant (Fragment) OS=Homo sapiens PE=2 SV=1                                                                                                            | Q53F91_HUMAN (+1)     | 93 kDa  | 0.046  | BRAC1 high, Naive low | 0  | 0  | 0  | 27 | 23 | 8  |
| Vinculin, isoform CRA_c OS=Homo sapiens GN=VCL PE=4 SV=1                                                                                                         | A0A024QZN4_HUMAN (+2) | 117 kDa | 0.0074 | BRAC1 low, Naive high | 15 | 12 | 18 | 8  | 6  | 4  |
| Voltage-dependent anion channel 2, isoform CRA_a OS=Homo sapiens GN=VDAC2 PE=4 SV=1                                                                              | A0A024QZN9_HUMAN (+3) | 34 kDa  | 0.0016 | BRAC1 low, Naive high | 8  | 10 | 11 | 6  | 6  | 10 |
| Voltage-dependent anion-selective channel protein 1 OS=Homo sapiens GN=VDAC1 PE=1 SV=2                                                                           | VDAC1_HUMAN           | 31 kDa  | 0.0088 | BRAC1 low, Naive high | 11 | 21 | 17 | 3  | 8  | 8  |
| Voltage-dependent anion-selective channel protein 3 OS=Homo sapiens GN=VDAC3 PE=1 SV=1                                                                           | VDAC3_HUMAN           | 31 kDa  | 0.12   | []                    | 1  | 0  | 2  | 0  | 0  | 0  |
| Voltage-dependent calcium channel subunit alpha-2/delta-1 OS=Homo sapiens GN=CACNA2D1 PE=1 SV=3                                                                  | CA2D1_HUMAN           | 125 kDa | 0.37   | []                    | 0  | 0  | 6  | 0  | 0  | 0  |
| WASH complex subunit strumpellin OS=Homo sapiens GN=KIAA0196 PE=1 SV=1                                                                                           | STRUM_HUMAN (+1)      | 134 kDa | 0.37   | []                    | 0  | 0  | 0  | 0  | 0  | 4  |
| Epididymis secretory protein Li 52 OS=Homo sapiens GN=HEL-5-52 PE=2 SV=1                                                                                         | V9HWG7_HUMAN (+1)     | 66 kDa  | 0.63   | []                    | 3  | 3  | 17 | 9  | 17 | 18 |
| WD repeat domain 1, isoform CRA_a (Fragment) OS=Homo sapiens GN=WDR1 PE=2 SV=1                                                                                   | Q53GN4_HUMAN (+2)     | 66 kDa  | 0.73   | []                    | 3  | 3  | 18 | 9  | 17 | 17 |
| WD repeat-containing protein 11 OS=Homo sapiens GN=WDR11 PE=1 SV=1                                                                                               | WDR11_HUMAN (+2)      | 137 kDa | 0.37   | []                    | 0  | 0  | 0  | 0  | 0  | 2  |
| WD repeat-containing protein 61 OS=Homo sapiens GN=WDR61 PE=1 SV=1                                                                                               | WDR61_HUMAN (+1)      | 34 kDa  | 0.37   | []                    | 0  | 0  | 0  | 0  | 0  | 4  |
| Wiskott-Aldrich syndrome protein family member 2 OS=Homo sapiens GN=WASF2 PE=1 SV=3                                                                              | WASF2_HUMAN           | 54 kDa  | 0.027  | BRAC1 high, Naive low | 0  | 0  | 1  | 6  | 5  | 3  |
| Wolfgramin OS=Homo sapiens GN=WFS1 PE=1 SV=2                                                                                                                     | WFS1_HUMAN            | 100 kDa | 0.19   | []                    | 1  | 2  | 1  | 1  | 1  | 2  |
| X-ray repair complementing defective repair in Chinese hamster cells 6 (Ku autoantigen, 70kDa), isoform CRA_a OS=Homo sapiens GN=XRCC5 PE=1 SV=3                 | A0A024R1N4_HUMAN (+1) | 70 kDa  | 0.2    | []                    | 0  | 1  | 4  | 3  | 5  | 13 |
| X-ray repair cross-complementing protein 5 OS=Homo sapiens GN=XRCC5 PE=1 SV=3                                                                                    | XRCC5_HUMAN           | 83 kDa  | 0.3    | []                    | 0  | 0  | 3  | 2  | 2  | 9  |
| Xaa-Pro dipeptidase OS=Homo sapiens GN=PEPD PE=1 SV=3                                                                                                            | PEPD_HUMAN (+1)       | 55 kDa  | 0.69   | []                    | 0  | 0  | 1  | 0  | 0  | 3  |
| Zinc finger CCCH domain-containing protein 15 OS=Homo sapiens GN=ZC3H15 PE=1 SV=1                                                                                | ZC3HF_HUMAN (+1)      | 49 kDa  | 0.37   | []                    | 0  | 0  | 0  | 0  | 0  | 2  |
| Zinc finger protein 185 (Fragment) OS=Homo sapiens GN=ZNF185 PE=1 SV=2                                                                                           | H0Y704_HUMAN          | 48 kDa  | 0.12   | []                    | 0  | 0  | 0  | 7  | 7  | 0  |
| Zinc finger protein 185 OS=Homo sapiens GN=ZNF185 PE=1 SV=3                                                                                                      | ZNF185_HUMAN          | 74 kDa  | 0.12   | []                    | 0  | 0  | 0  | 7  | 7  | 0  |
| Zinc transporter 1 OS=Homo sapiens GN=SLC30A1 PE=1 SV=3                                                                                                          | ZNT1_HUMAN            | 55 kDa  | 0.3    | []                    | 0  | 0  | 1  | 2  | 2  | 0  |
| Zinc transporter ZIP14 OS=Homo sapiens GN=SLC39A14 PE=1 SV=3                                                                                                     | S39AE_HUMAN (+1)      | 54 kDa  | 0.12   | []                    | 0  | 2  | 2  | 0  | 0  | 0  |
| Zinc-alpha-2-glycoprotein OS=Homo sapiens GN=AZGP1 PE=1 SV=2                                                                                                     | ZA2G_HUMAN (+1)       | 34 kDa  | 0.37   | []                    | 0  | 0  | 0  | 0  | 0  | 3  |
| Zyxin OS=Homo sapiens GN=ZYG PE=1 SV=1                                                                                                                           | ZYG_HUMAN             | 61 kDa  | 0.47   | []                    | 3  | 6  | 5  | 7  | 7  | 5  |
| cAMP-dependent protein kinase catalytic subunit beta OS=Homo sapiens GN=PRKACB PE=1 SV=2                                                                         | KAPCB_HUMAN (+5)      | 41 kDa  | 0.13   | []                    | 0  | 1  | 2  | 0  | 0  | 0  |
| cAMP-dependent protein kinase type I-alpha regulatory subunit OS=Homo sapiens GN=PRKAR1A PE=1 SV=1                                                               | KAPO_HUMAN (+3)       | 43 kDa  | 0.12   | []                    | 1  | 1  | 1  | 0  | 0  | 2  |
| cDNA FLJ12766 fis, clone NT2RP2001520, highly similar to Calcium-binding mitochondrial carrier protein Aralar1 OS=Homo sapiens PE=1 SV=1                         | B3KMOV8_HUMAN (+1)    | 75 kDa  | 0.68   | []                    | 1  | 1  | 0  | 0  | 2  | 4  |
| cDNA FLJ14916 fis, clone PLACE1006958, highly similar to Heat shock 70 kDa protein 4L (Fragment) OS=Homo sapiens PE=2 SV=1                                       | B3KNMO_HUMAN (+4)     | 64 kDa  | 0.13   | []                    | 0  | 0  | 0  | 2  | 0  | 4  |
| cDNA FLJ16785 fis, clone NT2RI2015342, highly similar to Solute carrier family 2, facilitated glucose transporter member 1 OS=Homo sapiens PE=1 SV=1             | B3KVN0_HUMAN (+3)     | 46 kDa  | 0.013  | BRAC1 high, Naive low | 0  | 1  | 1  | 5  | 8  | 6  |
| cDNA FLJ31446 fis, clone NT2NE2000909, highly similar to Guanine nucleotide-binding protein G(o) subunit alpha 1 OS=Homo sapiens PE=1 SV=1                       | B3KP89_HUMAN (+1)     | 40 kDa  | 0.17   | []                    | 0  | 2  | 6  | 0  | 0  | 0  |
| cDNA FLJ32798 fis, clone TESTI2002498, highly similar to Homo sapiens membrane protein, palmitoylated 7 (MAGUK p55 subfamily member 1) OS=Homo sapiens PE=1 SV=1 | B3KQ45_HUMAN (+1)     | 66 kDa  | 0.076  | []                    | 0  | 0  | 0  | 1  | 4  | 2  |
| cDNA FLJ34794 fis, clone NT2NE2005676, highly similar to Gamma-tubulin complex component 2 OS=Homo sapiens PE=2 SV=1                                             | B3KRS1_HUMAN (+3)     | 83 kDa  | 0.19   | []                    | 0  | 0  | 0  | 0  | 2  | 1  |
| cDNA FLJ36069 fis, clone TESTI2019406, highly similar to HEME OXYGENASE 2 (EC 1.14.99.3) OS=Homo sapiens PE=2 SV=1                                               | B3KSE0_HUMAN (+3)     | 36 kDa  | 0.37   | []                    | 0  | 0  | 1  | 1  | 0  | 5  |
| cDNA FLJ41755 fis, clone HSYRA2009102, highly similar to Adenosine 3'-phospho 5'-phosphosulfate transporter 1 OS=Homo sapiens PE=1 SV=1                          | B3KVY9_HUMAN (+1)     | 45 kDa  | 0.21   | []                    | 1  | 1  | 1  | 1  | 0  | 2  |
| cDNA FLJ44733 fis, clone BRACE3026290, highly similar to Lethal(2) giant larvae protein homolog 2 OS=Homo sapiens PE=2 SV=1                                      | B3KX47_HUMAN (+2)     | 111 kDa | 0.11   | []                    | 0  | 0  | 0  | 3  | 2  | 1  |
| cDNA FLJ44920 fis, clone BRAMY3011501, highly similar to Heterogeneous nuclear ribonucleoprotein U OS=Homo sapiens PE=2 SV=1                                     | B3KX72_HUMAN (+1)     | 83 kDa  | 0.48   | []                    | 2  | 1  | 6  | 3  | 3  | 4  |
| cDNA FLJ50039, highly similar to Homo sapiens solute carrier family 25, member 24, transcript variant 1, mRNA OS=Homo sapiens PE=1 SV=1                          | B4E290_HUMAN (+2)     | 53 kDa  | 0.25   | []                    | 2  | 0  | 4  | 1  | 0  | 2  |
| cDNA FLJ50778, highly similar to Protein flightless-1 homolog OS=Homo sapiens PE=2 SV=1                                                                          | B4DIX0_HUMAN (+1)     | 141 kDa | 0.11   | []                    | 0  | 0  | 0  | 1  | 1  | 5  |
| cDNA FLJ51365, highly similar to Flap endonuclease 1 (EC 3.1.-.-) OS=Homo sapiens PE=2 SV=1                                                                      | B4DWZ4_HUMAN (+2)     | 39 kDa  | 0.028  | BRAC1 high, Naive low | 0  | 0  | 0  | 1  | 2  | 1  |
| cDNA FLJ51671, highly similar to Prenylcysteine oxidase (EC 1.8.3.5) OS=Homo sapiens PE=2 SV=1                                                                   | B7Z8A2_HUMAN (+1)     | 55 kDa  | 0.18   | []                    | 4  | 2  | 7  | 1  | 3  | 7  |
| cDNA FLJ53290, highly similar to Cytoplasmic dynein 1 intermediate chain 2 OS=Homo sapiens PE=2 SV=1                                                             | B4DPZ3_HUMAN (+1)     | 70 kDa  | 0.18   | []                    | 4  | 0  | 6  | 1  | 0  | 2  |
| cDNA FLJ53321, highly similar to Homo sapiens ptilyrin metalloproteinase 1 (PITRM1), mRNA OS=Homo sapiens PE=2 SV=1                                              | B4DH07_HUMAN (+2)     | 116 kDa | 0.27   | []                    | 0  | 0  | 2  | 2  | 2  | 2  |
| cDNA FLJ53478, highly similar to Galectin-3-binding protein OS=Homo sapiens PE=2 SV=1                                                                            | B4DVE1_HUMAN (+1)     | 64 kDa  | 0.0011 | BRAC1 high, Naive low | 0  | 0  | 1  | 13 | 11 | 21 |
| Heat shock protein 90kDa alpha (Cytosolic), class B member 1, isoform CRA_a OS=Homo sapiens GN=HSP90A1 PE=3 SV=1                                                 | A0A024RD80_HUMAN (+1) | 83 kDa  | 0.14   | []                    | 10 | 8  | 14 | 26 | 23 | 66 |
| cDNA FLJ53619, highly similar to Heat shock protein HSP 90-beta OS=Homo sapiens PE=2 SV=1                                                                        | B4DGL0_HUMAN          | 82 kDa  | 0.19   | []                    | 10 | 8  | 12 | 23 | 20 | 63 |
| cDNA FLJ53327, highly similar to Gelsolin OS=Homo sapiens PE=2 SV=1                                                                                              | B7Z2K4_HUMAN          | 78 kDa  | 0.027  | BRAC1 low, Naive high | 7  | 12 | 19 | 5  | 7  | 15 |
| cDNA FLJ53698, highly similar to Gelsolin OS=Homo sapiens PE=2 SV=1                                                                                              | B7Z929_HUMAN          | 79 kDa  | 0.028  | BRAC1 low, Naive high | 7  | 13 | 20 | 5  | 7  | 15 |
| cDNA FLJ53963, highly similar to Leukocyte elastase inhibitor OS=Homo sapiens PE=2 SV=1                                                                          | B4E3A8_HUMAN (+2)     | 39 kDa  | 0.03   | BRAC1 high, Naive low | 0  | 0  | 0  | 1  | 1  | 3  |
| cDNA FLJ54014, highly similar to All-trans-retinol 13,14-reductase(EC 1.3.99.23) OS=Homo sapiens PE=2 SV=1                                                       | B4DKE1_HUMAN (+2)     | 61 kDa  | 0.88   | []                    | 0  | 0  | 2  | 1  | 1  | 1  |
| cDNA FLJ54117, highly similar to CD97 antigen OS=Homo sapiens PE=2 SV=1                                                                                          | B4DTS6_HUMAN (+2)     | 84 kDa  | 0.45   | []                    | 0  | 0  | 2  | 2  | 1  | 2  |
| cDNA FLJ54170, highly similar to Cytosolic nonspecific dipeptidase OS=Homo sapiens PE=2 SV=1                                                                     | B4DV28_HUMAN (+2)     | 52 kDa  | 0.11   | []                    | 0  | 0  | 1  | 2  | 2  | 1  |
| cDNA FLJ54290, highly similar to Mitochondrial inner membrane protein OS=Homo sapiens PE=2 SV=1                                                                  | B4DS66_HUMAN (+1)     | 73 kDa  | 0.68   | []                    | 0  | 1  | 7  | 1  | 5  | 11 |
| cDNA FLJ54303, highly similar to Heat shock 70 kDa protein 1 OS=Homo sapiens PE=2 SV=1                                                                           | B4DFN9_HUMAN          | 62 kDa  | 0.043  | BRAC1 high, Naive low | 8  | 6  | 14 | 22 | 22 | 39 |
| cDNA FLJ54370, highly similar to Heat shock 70 kDa protein 1 OS=Homo sapiens PE=2 SV=1                                                                           | B4DNT8_HUMAN          | 67 kDa  | 0.016  | BRAC1 high, Naive low | 6  | 5  | 13 | 23 | 22 | 40 |
| cDNA FLJ54723, highly similar to Poly (ADP-ribose) polymerase 9 (EC 2.4.2.30) OS=Homo sapiens PE=2 SV=1                                                          | B7Z5L6_HUMAN (+1)     | 88 kDa  | 0.03   | BRAC1 high, Naive low | 0  | 0  | 0  | 1  | 1  | 3  |

|                                                                                                                                                                         |                    |         |         |                       |    |    |    |    |    |    |
|-------------------------------------------------------------------------------------------------------------------------------------------------------------------------|--------------------|---------|---------|-----------------------|----|----|----|----|----|----|
| cdNA FLJ54827, highly similar to Alpha-parvin OS=Homo sapiens PE=2 SV=1                                                                                                 | B7Z952_HUMAN (+3)  | 33 kDa  | 0.75    | []                    | 2  | 0  | 3  | 2  | 2  | 3  |
| cdNA FLJ55671, highly similar to Ubiquitin-associated protein 2-like OS=Homo sapiens PE=2 SV=1                                                                          | B4DY55_HUMAN (+2)  | 114 kDa | 0.26    | []                    | 0  | 1  | 0  | 1  | 1  | 3  |
| cdNA FLJ55697, highly similar to Protein transport protein Sec23B OS=Homo sapiens PE=2 SV=1                                                                             | B4DJW8_HUMAN (+2)  | 84 kDa  | 0.2     | []                    | 0  | 0  | 0  | 1  | 2  | 13 |
| cdNA FLJ55809 OS=Homo sapiens PE=2 SV=1                                                                                                                                 | B4DN31_HUMAN (+2)  | 51 kDa  | 0.26    | []                    | 0  | 0  | 1  | 2  | 0  | 4  |
| cdNA FLJ56108, highly similar to Puromycin-sensitive aminopeptidase (EC 3.4.11.-) OS=Homo sapiens PE=2 SV=1                                                             | B7Z4B2_HUMAN (+3)  | 93 kDa  | 0.39    | []                    | 0  | 0  | 2  | 1  | 1  | 6  |
| cdNA FLJ56274, highly similar to Transketolase (EC 2.2.1.1) OS=Homo sapiens PE=2 SV=1                                                                                   | B4E022_HUMAN (+3)  | 63 kDa  | 0.49    | []                    | 7  | 5  | 15 | 11 | 11 | 15 |
| cdNA FLJ56280, highly similar to Endoplasmic reticulum-Golgi intermediate compartment protein 1 OS=Homo sapiens PE=2 SV=1                                               | B4E0N6_HUMAN (+1)  | 26 kDa  | 0.32    | []                    | 0  | 0  | 2  | 0  | 3  | 7  |
| cdNA FLJ56307, highly similar to Ubiquitin thioesterase protein OTUB1 (EC 3.4.-.-) OS=Homo sapiens PE=2 SV=1                                                            | B4DPD5_HUMAN (+3)  | 35 kDa  | 0.011   | BRAC1 high, Naive low | 0  | 0  | 0  | 1  | 2  | 3  |
| cdNA FLJ56381, highly similar to Dynamamin-1-like protein (EC 3.6.5.5) OS=Homo sapiens PE=2 SV=1                                                                        | B4DYR6_HUMAN (+6)  | 85 kDa  | 0.15    | []                    | 0  | 0  | 2  | 2  | 2  | 4  |
| cdNA FLJ56822, highly similar to Alpha-2-HS-glycoprotein OS=Homo sapiens PE=2 SV=1                                                                                      | B7Z556_HUMAN (+2)  | 27 kDa  | 0.0046  | BRAC1 low, Naive high | 2  | 3  | 3  | 1  | 2  | 2  |
| cdNA FLJ57632, highly similar to Vacuolar ATP synthase subunit B, kidney isoform (EC 3.6.3.14) OS=Homo sapiens PE=2 SV=1                                                | B4DWH7_HUMAN (+2)  | 54 kDa  | 0.7     | []                    | 0  | 1  | 0  | 0  | 0  | 4  |
| cdNA FLJ58042, highly similar to Protein NipSnap1 OS=Homo sapiens PE=2 SV=1                                                                                             | B4DQI7_HUMAN (+1)  | 31 kDa  | 0.42    | []                    | 0  | 1  | 1  | 1  | 1  | 4  |
| cdNA FLJ58258, highly similar to Cyclin G-associated kinase (EC 2.7.11.1) OS=Homo sapiens PE=2 SV=1                                                                     | B4DS37_HUMAN (+1)  | 132 kDa | 0.11    | []                    | 0  | 0  | 0  | 1  | 1  | 5  |
| cdNA FLJ58285, highly similar to Homo sapiens pre-B-cell leukemia transcription factor interacting protein 1 (PBXIP1), mRNA OS=Homo sapiens PE=2 SV=1                   | B4DV94_HUMAN (+3)  | 58 kDa  | 0.22    | []                    | 1  | 1  | 3  | 1  | 0  | 3  |
| cdNA FLJ58682, highly similar to Vesicle-fusing ATPase (EC 3.6.4.6) OS=Homo sapiens PE=2 SV=1                                                                           | B7Z5J7_HUMAN (+2)  | 82 kDa  | 0.23    | []                    | 0  | 1  | 3  | 2  | 4  | 11 |
| cdNA FLJ59571, highly similar to Eukaryotic translation initiation factor 4gamma 2 OS=Homo sapiens PE=2 SV=1                                                            | B4DZF2_HUMAN (+3)  | 110 kDa | 0.14    | []                    | 0  | 0  | 0  | 1  | 1  | 6  |
| cdNA FLJ52902, highly similar to Rab GDP dissociation inhibitor alpha OS=Homo sapiens PE=2 SV=1                                                                         | B4DHX4_HUMAN (+1)  | 47 kDa  | 0.00013 | BRAC1 high, Naive low | 0  | 0  | 0  | 5  | 4  | 6  |
| cdNA FLJ60299, highly similar to Rab GDP dissociation inhibitor beta OS=Homo sapiens PE=2 SV=1                                                                          | B4DLV7_HUMAN (+2)  | 51 kDa  | 0.029   | BRAC1 high, Naive low | 1  | 1  | 4  | 6  | 6  | 9  |
| cdNA FLJ60385, highly similar to Integrin alpha-3 OS=Homo sapiens PE=2 SV=1                                                                                             | B4E0H8_HUMAN (+1)  | 115 kDa | 0.8     | []                    | 3  | 3  | 8  | 8  | 7  | 5  |
| cdNA FLJ60461, highly similar to Peroxiredoxin-2 (EC 1.11.1.15) OS=Homo sapiens PE=2 SV=1                                                                               | B4DF70_HUMAN (+2)  | 20 kDa  | 0.7     | []                    | 6  | 5  | 3  | 19 | 9  | 3  |
| cdNA FLJ60960, highly similar to Phosphatidylinositol 4-kinase alpha (EC 2.7.1.67) OS=Homo sapiens PE=2 SV=1                                                            | B4DYG5_HUMAN (+3)  | 237 kDa | 0.17    | []                    | 0  | 0  | 0  | 0  | 1  | 3  |
| cdNA FLJ52516, moderately similar to Basigin OS=Homo sapiens PE=2 SV=3                                                                                                  | A8MZ77_HUMAN       | 17 kDa  | 0.9     | []                    | 7  | 5  | 9  | 17 | 12 | 7  |
| cdNA FLJ61188, highly similar to Basigin OS=Homo sapiens PE=2 SV=1                                                                                                      | B4DY23_HUMAN (+1)  | 28 kDa  | 0.8     | []                    | 10 | 8  | 11 | 19 | 16 | 10 |
| cdNA FLJ61189, highly similar to Cysteine and glycine-rich protein 1 OS=Homo sapiens PE=2 SV=1                                                                          | B4DY28_HUMAN (+1)  | 20 kDa  | 0.29    | []                    | 2  | 3  | 12 | 5  | 4  | 2  |
| Neutral alpha-glucosidase AB OS=Homo sapiens GN=GANAB PE=1 SV=1                                                                                                         | E9PKU7_HUMAN       | 97 kDa  | 0.81    | []                    | 8  | 12 | 17 | 11 | 17 | 41 |
| cdNA FLJ61290, highly similar to Neutral alpha-glucosidase AB OS=Homo sapiens PE=2 SV=1                                                                                 | B4DJ30_HUMAN (+2)  | 113 kDa | 0.6     | []                    | 13 | 14 | 20 | 18 | 26 | 49 |
| cdNA FLJ61587, highly similar to Integrin alpha-1 (Fragment) OS=Homo sapiens PE=2 SV=1                                                                                  | B4D7Y8_HUMAN (+1)  | 130 kDa | 0.083   | []                    | 0  | 1  | 4  | 10 | 9  | 5  |
| cdNA FLJ75299, highly similar to Xenopus laevis proteasome (prosome, macropain) 26S subunit, ATPase 3, mRNA OS=Homo sapiens PE=2 SV=1                                   | A8K781_HUMAN (+1)  | 47 kDa  | 0.82    | []                    | 0  | 0  | 4  | 1  | 2  | 4  |
| cdNA FLJ75516, highly similar to Xenopus tropicalis ubiquitin C, mRNA OS=Homo sapiens PE=2 SV=1                                                                         | A8K674_HUMAN (+36) | 68 kDa  | 0.41    | []                    | 13 | 19 | 6  | 33 | 30 | 29 |
| cdNA FLJ75699, highly similar to Homo sapiens osteoclast stimulating factor 1 (OSTF1), mRNA OS=Homo sapiens PE=2 SV=1                                                   | A8K646_HUMAN (+1)  | 24 kDa  | 0.13    | []                    | 0  | 0  | 0  | 1  | 0  | 2  |
| Complement component 1 Q subcomponent-binding protein, mitochondrial OS=Homo sapiens GN=C1QBP PE=1 SV=1                                                                 | I3L3B0_HUMAN (+1)  | 20 kDa  | 0.39    | []                    | 1  | 1  | 2  | 0  | 0  | 5  |
| cdNA FLJ75700, highly similar to Homo sapiens complement component 1, q subcomponent binding protein (C1QBP), nuclear gene OS=Homo sapiens PE=2 SV=1                    | A8K651_HUMAN (+1)  | 31 kDa  | 0.19    | []                    | 1  | 2  | 5  | 1  | 0  | 6  |
| cdNA FLJ75774, highly similar to Homo sapiens lectin, mannose-binding 2 (LMAN2), mRNA OS=Homo sapiens PE=2 SV=1                                                         | A8K7T4_HUMAN (+1)  | 40 kDa  | 0.97    | []                    | 0  | 4  | 3  | 2  | 0  | 10 |
| Transferrin receptor protein 1 OS=Homo sapiens GN=TFRC PE=1 SV=2                                                                                                        | TFRC_HUMAN         | 85 kDa  | 0.036   | BRAC1 high, Naive low | 7  | 7  | 6  | 22 | 19 | 21 |
| cdNA FLJ75881, highly similar to Homo sapiens transferrin receptor (p90, CD71) (TFRC), mRNA OS=Homo sapiens PE=2 SV=1                                                   | A8K6Q8_HUMAN       | 85 kDa  | 0.031   | BRAC1 high, Naive low | 7  | 7  | 7  | 22 | 19 | 21 |
| cdNA FLJ75930, highly similar to Homo sapiens NADH dehydrogenase (ubiquinone) 1 alpha subcomplex, 9, 39kDa (NDUFA9), mRNA OS=Homo sapiens PE=2 SV=1                     | A8K4V2_HUMAN (+2)  | 42 kDa  | 0.37    | []                    | 0  | 0  | 0  | 0  | 0  | 2  |
| cdNA FLJ76064 OS=Homo sapiens PE=2 SV=1                                                                                                                                 | A8K9V9_HUMAN (+1)  | 35 kDa  | 0.077   | []                    | 0  | 0  | 0  | 5  | 3  | 1  |
| cdNA FLJ76121, highly similar to Homo sapiens zinc finger CCCH-type, antiviral 1 (ZC3HAV1), transcript variant 1, mRNA OS=Homo sapiens PE=2 SV=1                        | A8K9U6_HUMAN (+1)  | 101 kDa | 0.86    | []                    | 3  | 2  | 2  | 4  | 3  | 7  |
| cdNA FLJ76169 OS=Homo sapiens PE=2 SV=1                                                                                                                                 | A8K4K9_HUMAN (+2)  | 35 kDa  | 0.5     | []                    | 0  | 1  | 2  | 1  | 2  | 4  |
| cdNA FLJ76245, highly similar to Homo sapiens desmocollin 2 (DSC2), transcript variant Dsc2a, mRNA OS=Homo sapiens PE=2 SV=1                                            | A8K2P8_HUMAN (+6)  | 100 kDa | 0.12    | []                    | 0  | 0  | 0  | 2  | 2  | 0  |
| cdNA FLJ76605, highly similar to Homo sapiens secretory carrier membrane protein 1 (SCAMP1), transcript variant 1, mRNA OS=Homo sapiens PE=2 SV=1                       | A8K2G0_HUMAN (+1)  | 38 kDa  | 0.11    | []                    | 1  | 1  | 3  | 1  | 0  | 2  |
| cdNA FLJ76654, highly similar to Homo sapiens CD44 antigen (homing function and Indian blood group system) (CD44), transcript variant 1, mRNA OS=Homo sapiens PE=2 SV=1 | A8K309_HUMAN (+2)  | 39 kDa  | 0.07    | []                    | 12 | 13 | 21 | 16 | 19 | 9  |
| cdNA FLJ76789, highly similar to Homo sapiens methionine-tRNA synthetase (MARS), mRNA OS=Homo sapiens PE=2 SV=1                                                         | A8K492_HUMAN (+1)  | 101 kDa | 0.18    | []                    | 0  | 0  | 0  | 5  | 1  | 22 |
| cdNA FLJ76863, highly similar to Homo sapiens stress-induced-phosphoprotein 1 (Hsp70/Hsp90-organizing protein) (STIP1), mRNA OS=Homo sapiens PE=2 SV=1                  | A8K690_HUMAN (+2)  | 63 kDa  | 0.14    | []                    | 0  | 0  | 1  | 2  | 1  | 6  |
| cdNA FLJ77464, highly similar to Homo sapiens protocadherin 1 (cadherin-like 1) (PCDH1), transcript variant 1, mRNA OS=Homo sapiens PE=2 SV=1                           | A8K0E7_HUMAN (+3)  | 115 kDa | 0.2     | []                    | 0  | 0  | 0  | 1  | 3  | 0  |
| cdNA FLJ77590, highly similar to Homo sapiens leucine rich repeat containing 1, mRNA OS=Homo sapiens PE=2 SV=1                                                          | A8K883_HUMAN (+1)  | 59 kDa  | 0.0049  | BRAC1 high, Naive low | 0  | 0  | 0  | 21 | 19 | 15 |
| cdNA FLJ77721, highly similar to Homo sapiens secretory carrier membrane protein 2 (SCAMP2), mRNA OS=Homo sapiens PE=2 SV=1                                             | A8K769_HUMAN (+2)  | 37 kDa  | 0.079   | []                    | 1  | 1  | 2  | 3  | 3  | 3  |
| cdNA FLJ77762, highly similar to Homo sapiens cullin-associated and neddylation-dissociated 1 (CAND1), mRNA OS=Homo sapiens PE=2 SV=1                                   | A8K8U1_HUMAN (+1)  | 136 kDa | 0.13    | []                    | 0  | 2  | 7  | 8  | 11 | 10 |
| cdNA FLJ77770, highly similar to Homo sapiens nucleobindin 1 (NUCB1), mRNA OS=Homo sapiens PE=2 SV=1                                                                    | A8K7Q1_HUMAN (+2)  | 54 kDa  | 0.67    | []                    | 2  | 3  | 2  | 2  | 2  | 7  |
| Eukaryotic initiation factor 4A-II OS=Homo sapiens GN=EIF4A2 PE=1 SV=1                                                                                                  | E7EQG2_HUMAN (+1)  | 41 kDa  | 0.51    | []                    | 3  | 0  | 4  | 4  | 3  | 13 |
| cdNA FLJ78244, highly similar to Homo sapiens eukaryotic translation initiation factor 4A, isoform 1 (EIF4A1), mRNA OS=Homo sapiens PE=2 SV=1                           | A8K7F6_HUMAN (+1)  | 46 kDa  | 0.45    | []                    | 3  | 1  | 4  | 4  | 3  | 23 |
| cdNA FLJ78449 OS=Homo sapiens PE=2 SV=1                                                                                                                                 | A8K5S3_HUMAN (+1)  | 40 kDa  | 0.026   | BRAC1 high, Naive low | 0  | 0  | 0  | 2  | 3  | 7  |
| cdNA FLJ78458, highly similar to Homo sapiens septin 10 (SEPT10), transcript variant 1, mRNA OS=Homo sapiens PE=2 SV=1                                                  | A8K7M3_HUMAN (+4)  | 53 kDa  | 0.16    | []                    | 0  | 0  | 0  | 0  | 3  | 2  |
| cdNA FLJ78497 OS=Homo sapiens PE=2 SV=1                                                                                                                                 | A8K1E9_HUMAN (+4)  | 54 kDa  | 0.37    | []                    | 0  | 0  | 0  | 0  | 0  | 2  |
| cdNA FLJ78586, highly similar to Homo sapiens VAMP (vesicle-associated membrane protein)-associated protein A, 33kDa (VAPA), mRNA OS=Homo sapiens PE=2 SV=1             | A8KA83_HUMAN (+1)  | 27 kDa  | 0.41    | []                    | 0  | 2  | 3  | 2  | 4  | 6  |
| cdNA FLJ78635, highly similar to Homo sapiens ATP synthase, H+ transporting, mitochondrial FO complex, subunit b, isoform 1 (ATP5B), mRNA OS=Homo sapiens PE=2 SV=1     | A8K4W2_HUMAN (+3)  | 29 kDa  | 0.93    | []                    | 0  | 0  | 4  | 1  | 1  | 3  |
| cdNA FLJ90354 fis, clone NT2RP2003390, highly similar to Translocation protein SEC63 homolog OS=Homo sapiens PE=2 SV=1                                                  | B3KQF0_HUMAN (+1)  | 88 kDa  | 0.82    | []                    | 2  | 1  | 1  | 1  | 0  | 6  |
| cdNA, FLJ93042, highly similar to Homo sapiens signal sequence receptor, alpha (translocon-associated protein alpha) (SSR1), mRNA OS=Homo sapiens PE=2 SV=1             | B2R6N9_HUMAN (+5)  | 32 kDa  | 0.3     | []                    | 3  | 2  | 1  | 1  | 2  | 3  |
| cdNA, FLJ93299, highly similar to Homo sapiens sterol carrier protein 2 (SCP2), mRNA OS=Homo sapiens PE=2 SV=1                                                          | B2R761_HUMAN (+1)  | 59 kDa  | 0.04    | BRAC1 low, Naive high | 2  | 2  | 2  | 1  | 2  | 0  |
| cdNA, FLJ93507, highly similar to Homo sapiens ATPase, H+ transporting, lysosomal 38kDa, V0 subunit d isoform 1 (ATP6V0D1), mRNA OS=Homo sapiens PE=2 SV=1              | B2R7M1_HUMAN (+2)  | 40 kDa  | 0.39    | []                    | 0  | 2  | 4  | 2  | 0  | 2  |
| cdNA, FLJ93750, Homo sapiens DEAD (Asp-Glu-Ala-Asp) box polypeptide 6 (DDX6), mRNA OS=Homo sapiens PE=2 SV=1                                                            | B2R858_HUMAN (+1)  | 53 kDa  | 0.13    | []                    | 0  | 0  | 0  | 1  | 0  | 2  |
| cdNA, FLJ94230, highly similar to Homo sapiens thioredoxin-like 1 (TXNL1), mRNA OS=Homo sapiens PE=2 SV=1                                                               | B2R960_HUMAN (+2)  | 32 kDa  | 0.96    | []                    | 0  | 0  | 2  | 1  | 0  | 2  |

|                                                                                                                                           |                       |         |           |                       |    |    |    |    |    |    |
|-------------------------------------------------------------------------------------------------------------------------------------------|-----------------------|---------|-----------|-----------------------|----|----|----|----|----|----|
| cdNA, FLJ94267, highly similar to Homo sapiens glutathione S-transferase omega 1 (GSTO1), mRNA OS=Homo sapiens PE=2 SV=1                  | B2R983_HUMAN (+2)     | 28 kDa  | 0.69      | []                    | 0  | 1  | 3  | 1  | 2  | 1  |
| cdNA, FLJ94534, highly similar to Homo sapiens capping protein (actin filament), gelsolin-like (CAPG), mRNA OS=Homo sapiens PE=2 SV=1     | B2R954_HUMAN (+3)     | 38 kDa  | 0.017     | BRAC1 high, Naive low | 0  | 0  | 2  | 4  | 4  | 5  |
| cdNA, FLJ94599, highly similar to Homo sapiens GDP-mannose 4,6-dehydratase (GMDS), mRNA OS=Homo sapiens PE=2 SV=1                         | B2R9X3_HUMAN (+1)     | 42 kDa  | 0.17      | []                    | 0  | 0  | 0  | 1  | 0  | 3  |
| cdNA, FLJ94965, highly similar to Homo sapiens leucyl/cystinyl aminopeptidase (LNPEP), mRNA OS=Homo sapiens PE=2 SV=1                     | B2RAK1_HUMAN (+1)     | 117 kDa | 0.077     | []                    | 0  | 0  | 2  | 3  | 3  | 3  |
| cdNA, FLJ95288, highly similar to Homo sapiens feline leukemia virus subgroup C cellular receptor (FLVCR), mRNA OS=Homo sapiens PE=2 SV=1 | B2RB38_HUMAN (+1)     | 60 kDa  | 0.19      | []                    | 0  | 0  | 0  | 0  | 2  | 1  |
| cdNA, FLJ95416, highly similar to Homo sapiens phosphatidylinositol glycan, class 5 (PIGS), mRNA OS=Homo sapiens PE=2 SV=1                | B2RBB2_HUMAN (+2)     | 62 kDa  | 0.15      | []                    | 0  | 0  | 2  | 2  | 2  | 4  |
| cdNA, FLJ95650, highly similar to Homo sapiens karyopherin (importin) beta 1 (KPNB1), mRNA OS=Homo sapiens PE=2 SV=1                      | B2RBR9_HUMAN (+1)     | 97 kDa  | 0.062     | []                    | 1  | 3  | 8  | 12 | 10 | 20 |
| cdNA, FLJ95704, highly similar to Homo sapiens serine protease inhibitor, Kunitz type 1 (SPINT1), mRNA OS=Homo sapiens PE=2 SV=1          | B2RBU9_HUMAN (+3)     | 57 kDa  | 0.031     | BRAC1 high, Naive low | 0  | 0  | 0  | 4  | 2  | 2  |
| cdNA, FLJ96156, highly similar to Homo sapiens leucyl-tRNA synthetase (LARS), mRNA OS=Homo sapiens PE=2 SV=1                              | B2RCM2_HUMAN (+3)     | 134 kDa | 0.14      | []                    | 0  | 1  | 3  | 4  | 4  | 14 |
| cdNA, FLJ96428, highly similar to Homo sapiens proteasome (prosome, macropain) 26S subunit, non-ATPase, 7 (Mov34 homolog) (PS)            | B2RD27_HUMAN (+1)     | 37 kDa  | 0.13      | []                    | 0  | 0  | 0  | 1  | 0  | 2  |
| cdNA, FLJ96568, highly similar to Homo sapiens tropomyosin 3 (TPM3), mRNA OS=Homo sapiens PE=2 SV=1                                       | B2RDE1_HUMAN          | 29 kDa  | 0.21      | []                    | 12 | 13 | 10 | 14 | 16 | 9  |
| Erlin-2 (Fragment) OS=Homo sapiens GN=ERLIN2 PE=1 SV=1                                                                                    | E5RHW4_HUMAN (+1)     | 38 kDa  | 0.052     | []                    | 1  | 2  | 3  | 2  | 1  | 1  |
| cdNA, FLJ96656, highly similar to Homo sapiens SPFH domain family, member 1 (SPFH1), mRNA OS=Homo sapiens PE=2 SV=1                       | B2RDK6_HUMAN (+2)     | 39 kDa  | 0.15      | []                    | 2  | 2  | 2  | 3  | 1  | 2  |
| cdNA, FLJ96792, highly similar to Homo sapiens calmodulin 2 (phosphorylase kinase, delta) (CALM2), mRNA OS=Homo sapiens PE=2 SV=1         | B2RDW0_HUMAN (+4)     | 17 kDa  | 0.72      | []                    | 10 | 8  | 5  | 16 | 11 | 8  |
| cdNA, FLJ96812, highly similar to Homo sapiens threonyl-tRNA synthetase (TARS), mRNA OS=Homo sapiens PE=1 SV=1                            | B2RDY5_HUMAN          | 82 kDa  | 0.31      | []                    | 0  | 0  | 4  | 4  | 2  | 7  |
| tRNA (cytosine(34)-C(5))-methyltransferase OS=Homo sapiens GN=NSUN2 PE=1 SV=2                                                             | NSUN2_HUMAN           | 86 kDa  | 0.13      | []                    | 0  | 0  | 0  | 0  | 1  | 2  |
| tRNA-splicing ligase RtcB homolog OS=Homo sapiens GN=RTCB PE=1 SV=1                                                                       | RTCB_HUMAN            | 55 kDa  | 0.39      | []                    | 0  | 0  | 1  | 0  | 1  | 4  |
| tr A0A024R4E5 A0A024R4E5_HUMAN High density lipoprotein binding protein (Vigilin),...                                                     | A0A024R4E5_HUMAN      | ?       | 0.56      | []                    | 3  | 7  | 6  | 0  | 2  | 18 |
| tr A0A024R5C4 A0A024R5C4_HUMAN Reticulon OS=Homo sapiens GN=RTN3 PE=4 SV=1                                                                | A0A024R5C4_HUMAN      | ?       | 0.37      | []                    | 0  | 0  | 0  | 0  | 0  | 3  |
| tr A0A024R152 A0A024R152_HUMAN HCG28765, isoform CRA_b OS=Homo sapiens GN=HCG_28765...                                                    | A0A024R152_HUMAN      | ?       | 0.018     | BRAC1 low, Naive high | 3  | 4  | 2  | 0  | 0  | 0  |
| tr A0A024R201 A0A024R201_HUMAN Proteasome (Prosome, macropain) 26S subunit, non-ATPase,...                                                | A0A024R201_HUMAN      | ?       | 0.55      | []                    | 0  | 0  | 2  | 0  | 0  | 10 |
| tr A0A024R462 A0A024R462_HUMAN Fibronectin 1, isoform CRA_n OS=Homo sapiens GN=FN1...                                                     | A0A024R462_HUMAN      | ?       | 0.0046    | BRAC1 low, Naive high | 30 | 56 | 43 | 0  | 0  | 0  |
| tr A0A024RDY9 A0A024RDY9_HUMAN Rho guanine nucleotide exchange factor (GEF) 7, isoform...                                                 | A0A024RDY9_HUMAN (+2) | ?       | 0.42      | []                    | 0  | 0  | 1  | 0  | 1  | 3  |
| tr B2RCM3 B2RCM3_HUMAN cDNA, FLJ96158, highly similar to Homo sapiens calpain 2,...                                                       | B2RCM3_HUMAN (+2)     | ?       | 0.17      | []                    | 0  | 1  | 3  | 0  | 0  | 0  |
| tr B4DPY0 B4DPY0_HUMAN Glutathione peroxidase OS=Homo sapiens PE=2 SV=1                                                                   | B4DPY0_HUMAN          | ?       | 0.12      | []                    | 0  | 2  | 2  | 0  | 0  | 0  |
| tr B4DTS2 B4DTS2_HUMAN Serine/threonine-protein kinase OS=Homo sapiens GN=PRKD2 PE=1...                                                   | B4DTS2_HUMAN          | ?       | 0.37      | []                    | 0  | 0  | 0  | 0  | 0  | 6  |
| tr B4DV84 B4DV84_HUMAN cDNA FLJ56159, highly similar to 26S proteasome non-ATPase...                                                      | B4DV84_HUMAN          | ?       | 0.47      | []                    | 0  | 0  | 1  | 0  | 0  | 8  |
| tr B4DVS4 B4DVS4_HUMAN cDNA FLJ57619, highly similar to Delta 3,5-delta 2,4-dienoyl-CoA...                                                | B4DVS4_HUMAN          | ?       | 0.41      | []                    | 0  | 0  | 2  | 0  | 4  | 3  |
| tr B7Z6U8 B7Z6U8_HUMAN cDNA FLJ53665, highly similar to Four and a half LIM domains...                                                    | B7Z6U8_HUMAN (+1)     | ?       | 0.25      | []                    | 0  | 1  | 6  | 0  | 0  | 0  |
| tr B7ZKT9 B7ZKT9_HUMAN KIAA1033 protein OS=Homo sapiens GN=KIAA1033 PE=2 SV=1                                                             | B7ZKT9_HUMAN          | ?       | 0.37      | []                    | 0  | 0  | 0  | 0  | 0  | 4  |
| tr B9EGI2 B9EGI2_HUMAN Myosin phosphatase Rho interacting protein OS=Homo sapiens...                                                      | B9EGI2_HUMAN          | ?       | 0.014     | BRAC1 low, Naive high | 1  | 3  | 4  | 0  | 0  | 0  |
| tr D7PBN3 D7PBN3_HUMAN ESRP1/RAF1 fusion protein OS=Homo sapiens PE=2 SV=1                                                                | D7PBN3_HUMAN          | ?       | 0.37      | []                    | 0  | 0  | 0  | 0  | 0  | 5  |
| tr E7ESL9 E7ESL9_HUMAN Arf-GAP with GTPase, ANK repeat and PH domain-containing protein...                                                | E7ESL9_HUMAN          | ?       | 0.37      | []                    | 0  | 0  | 0  | 0  | 0  | 2  |
| tr B7Z6G4 B7Z6G4_HUMAN cDNA FLJ53193, highly similar to Homo sapiens caldesmon 1...                                                       | B7Z6G4_HUMAN          | ?       | < 0.00010 | BRAC1 low, Naive high | 26 | 28 | 39 | 0  | 0  | 0  |
| tr E7EX44 E7EX44_HUMAN Caldesmon OS=Homo sapiens GN=CALD1 PE=1 SV=1                                                                       | E7EX44_HUMAN          | ?       | < 0.00010 | BRAC1 low, Naive high | 26 | 30 | 42 | 0  | 0  | 0  |
| tr Q6ICT6 Q6ICT6_HUMAN TNFRSF6 protein (Fragment) OS=Homo sapiens GN=TNFRSF6 PE=2...                                                      | Q6ICT6_HUMAN          | ?       | 0.28      | []                    | 0  | 1  | 4  | 0  | 1  | 0  |
