# Supplementary material for: Exosomes isolated from cancer patients’ sera transfer malignant traits and confer the same phenotype of primary tumors to oncosuppressor-mutated cells
Source: Springer Nature journal article supplement (doi:10.1186/s13046-017-0587-0), 2017-08-30
Supplement: MOESM3 [file 14956656]

**Supplementary Table 3. Plasma membrane proteins involved in microvesicles uptake\*.**

| Identified Proteins                                                                                                                      | Alternate Name        | MW      | T-Test (p-value) | Quantitative Profile  | Control |    |    | BRCA1-KO |     |    |
|------------------------------------------------------------------------------------------------------------------------------------------|-----------------------|---------|------------------|-----------------------|---------|----|----|----------|-----|----|
|                                                                                                                                          |                       |         |                  |                       | 1       | 2  | 3  | 1        | 2   | 3  |
| Dynamin-2 OS=Homo sapiens GN=DNM2 PE=1 SV=2                                                                                              | DYN2_HUMAN            | 98 kDa  | 0.00022          | BRAC1 high, Naive low | 0       | 0  | 1  | 13       | 11  | 18 |
| Dynamin-1 OS=Homo sapiens GN=DNM1 PE=1 SV=1                                                                                              | A0A0D9SFB1_HUMAN (+3) | 94 kDa  | 0.01             | BRAC1 high, Naive low | 0       | 0  | 0  | 2        | 4   | 3  |
| cDNA FLJ56381, highly similar to Dynamin-1-like protein (EC 3.6.5.5) OS=Homo sapiens PE=2 SV=1                                           | B4DYR6_HUMAN (+6)     | 85 kDa  | 0.15             | □                     | 0       | 0  | 2  | 2        | 2   | 4  |
| Dynamin-like 120 kDa protein, mitochondrial OS=Homo sapiens GN=OPAI1 PE=1 SV=1                                                           | E5KLJ5_HUMAN (+11)    | 118 kDa | 0.5              | □                     | 0       | 0  | 1  | 2        | 0   | 1  |
| Flotillin-1 OS=Homo sapiens GN=FLOT1 PE=1 SV=3                                                                                           | FLOT1_HUMAN (+2)      | 47 kDa  | 0.023            | BRAC1 high, Naive low | 4       | 4  | 8  | 13       | 13  | 14 |
| Integrin alpha-2 OS=Homo sapiens GN=ITGA2 PE=1 SV=1                                                                                      | ITA2_HUMAN            | 129 kDa | 0.2              | □                     | 10      | 12 | 14 | 41       | 34  | 20 |
| Integrin alpha-5 OS=Homo sapiens GN=ITGA5 PE=1 SV=2                                                                                      | ITA5_HUMAN (+1)       | 115 kDa | 0.00086          | BRAC1 low, Naive high | 7       | 7  | 8  | 0        | 0   | 0  |
| Integrin alpha-6 OS=Homo sapiens GN=ITGA6 PE=1 SV=5                                                                                      | ITA6_HUMAN            | 127 kDa | 0.0036           | BRAC1 high, Naive low | 0       | 0  | 0  | 41       | 36  | 30 |
| Integrin beta-1 OS=Homo sapiens GN=ITGB1 PE=1 SV=2                                                                                       | ITB1_HUMAN            | 88 kDa  | 0.77             | □                     | 14      | 18 | 21 | 38       | 39  | 17 |
| Integrin beta-5 OS=Homo sapiens GN=ITGB5 PE=1 SV=1                                                                                       | ITB5_HUMAN (+1)       | 88 kDa  | 0.061            | □                     | 1       | 1  | 2  | 3        | 5   | 9  |
| Integrin beta OS=Homo sapiens GN=ITGB4 PE=3 SV=1                                                                                         | A0A024R8K7_HUMAN (+2) | 195 kDa | 0.0049           | BRAC1 high, Naive low | 0       | 0  | 0  | 59       | 54  | 41 |
| Integrin beta OS=Homo sapiens PE=2 SV=1                                                                                                  | A8K2N5_HUMAN (+3)     | 86 kDa  | 0.013            | BRAC1 high, Naive low | 0       | 0  | 0  | 2        | 3   | 6  |
| Integrin alpha-2 OS=Homo sapiens GN=ITGA2 PE=1 SV=1                                                                                      | E7ESP4_HUMAN          | 103 kDa | 0.18             | □                     | 8       | 12 | 13 | 40       | 33  | 19 |
| Galectin OS=Homo sapiens GN=hCG_22119 PE=4 SV=1                                                                                          | A0A024R693_HUMAN (+3) | 26 kDa  | 0.53             | □                     | 2       | 2  | 2  | 7        | 6   | 1  |
| Galectin-1 OS=Homo sapiens GN=LGALS1 PE=1 SV=2                                                                                           | LEG1_HUMAN            | 15 kDa  | 0.0096           | BRAC1 low, Naive high | 3       | 6  | 4  | 0        | 0   | 0  |
| Galectin-4 OS=Homo sapiens GN=LGALS4 PE=1 SV=1                                                                                           | LEG4_HUMAN (+1)       | 36 kDa  | 0.057            | □                     | 0       | 0  | 2  | 104      | 113 | 26 |
| cDNA FLJ53478, highly similar to Galectin-3-binding protein OS=Homo sapiens PE=2 SV=1                                                    | B4DVE1_HUMAN (+1)     | 64 kDa  | 0.0011           | BRAC1 high, Naive low | 0       | 0  | 1  | 13       | 11  | 21 |
| Ras-related C3 botulinum toxin substrate 1 (Rho family, small GTP binding protein Rac1) OS=Homo sapiens GN=RAC1 PE=2 SV=1                | A4D2P0_HUMAN          | 23 kDa  | 0.13             | □                     | 1       | 1  | 0  | 6        | 9   | 2  |
| Ras-related C3 botulinum toxin substrate 1 (Rho family, small GTP binding protein Rac1) OS=Homo sapiens GN=RAC1 PE=2 SV=1                | A4D2P1_HUMAN (+1)     | 21 kDa  | 0.086            | □                     | 0       | 0  | 0  | 2        | 6   | 2  |
| Ras-related C3 botulinum toxin substrate 2 (Rho family, small GTP binding protein Rac2), isoform CRA_a OS=Homo sapiens GN=RAC2 PE=2 SV=1 | A0A024R1P2_HUMAN (+2) | 21 kDa  | 0.5              | □                     | 1       | 1  | 0  | 1        | 3   | 2  |
| Rho guanine nucleotide exchange factor (GEF) 1, isoform CRA_e OS=Homo sapiens GN=ARHGGEF1 PE=4 SV=1                                      | A0A024R0R1_HUMAN (+2) | 102 kDa | 0.095            | □                     | 0       | 0  | 0  | 1        | 6   | 13 |
| Ras homolog gene family, member A, isoform CRA_a OS=Homo sapiens GN=RHOA PE=3 SV=1                                                       | A0A024R324_HUMAN (+3) | 22 kDa  | 0.29             | □                     | 3       | 4  | 3  | 11       | 8   | 6  |
| Rho GTPase activating protein OS=Homo sapiens PE=2 SV=1                                                                                  | A9UK01_HUMAN (+1)     | 75 kDa  | 0.27             | □                     | 0       | 0  | 0  | 0        | 1   | 7  |
| Rho guanine nucleotide exchange factor 16 OS=Homo sapiens GN=ARHGGEF16 PE=1 SV=1                                                         | ARHGG_HUMAN (+1)      | 80 kDa  | 0.14             | □                     | 0       | 0  | 0  | 1        | 1   | 6  |
| CDC42 effector protein (Rho GTPase binding) 4, isoform CRA_a OS=Homo sapiens GN=CDC42EP4 PE=2 SV=1                                       | B2R6D8_HUMAN (+1)     | 38 kDa  | 0.028            | BRAC1 high, Naive low | 0       | 0  | 0  | 1        | 2   | 1  |
| trB9EG12/B9EG12_HUMAN Myosin phosphatase Rho interacting protein OS=Homo sapiens...                                                      | B9EG12_HUMAN          | ?       | 0.014            | BRAC1 low, Naive high | 1       | 3  | 4  | 0        | 0   | 0  |
| FERM, RhoGEF and pleckstrin domain-containing protein 1 OS=Homo sapiens GN=FARP1 PE=1 SV=1                                               | FARP1_HUMAN           | 119 kDa | 0.095            | □                     | 4       | 3  | 5  | 4        | 4   | 6  |
| FERM, RhoGEF and pleckstrin domain-containing protein 2 OS=Homo sapiens GN=FARP2 PE=1 SV=3                                               | FARP2_HUMAN           | 120 kDa | 0.12             | □                     | 0       | 0  | 0  | 4        | 5   | 0  |
| Rho GDP-dissociation inhibitor 1 OS=Homo sapiens GN=ARHGDI1 PE=1 SV=3                                                                    | GDIR1_HUMAN (+3)      | 23 kDa  | 0.48             | □                     | 1       | 1  | 4  | 0        | 3   | 3  |
| Rho GTPase-activating protein 1 OS=Homo sapiens GN=ARHGAP1 PE=1 SV=1                                                                     | RHG01_HUMAN           | 50 kDa  | 0.57             | □                     | 1       | 1  | 5  | 0        | 0   | 7  |
| Clathrin heavy chain OS=Homo sapiens GN=CLTC PE=1 SV=1                                                                                   | A0A087WVQ6_HUMAN (+1) | 192 kDa | 0.14             | □                     | 19      | 29 | 51 | 21       | 31  | 55 |
| Clathrin interactor 1 OS=Homo sapiens GN=CLINT1 PE=1 SV=1                                                                                | EPN4_HUMAN            | 68 kDa  | 0.21             | □                     | 0       | 0  | 0  | 0        | 1   | 4  |
| RAB5C, member RAS oncogene family, isoform CRA_a OS=Homo sapiens GN=RAB5C PE=3 SV=1                                                      | A0A024R1U4_HUMAN (+1) | 23 kDa  | 0.13             | □                     | 6       | 4  | 8  | 4        | 8   | 6  |
| RAB5A, member RAS oncogene family, isoform CRA_a OS=Homo sapiens GN=RAB5A PE=3 SV=1                                                      | A0A024R2K1_HUMAN (+1) | 24 kDa  | 0.82             | □                     | 1       | 1  | 2  | 3        | 0   | 3  |
| RAB6A, member RAS oncogene family, isoform CRA_b OS=Homo sapiens GN=RAB6A PE=3 SV=1                                                      | A0A024R5H8_HUMAN (+2) | 24 kDa  | 0.35             | □                     | 1       | 1  | 1  | 5        | 3   | 1  |
| RAB11A, member RAS oncogene family, isoform CRA_a OS=Homo sapiens GN=RAB11A PE=3 SV=1                                                    | A0A024R5Z8_HUMAN (+1) | 24 kDa  | 0.46             | □                     | 6       | 3  | 3  | 4        | 7   | 3  |
| RAB8A, member RAS oncogene family, isoform CRA_a OS=Homo sapiens GN=RAB8A PE=3 SV=1                                                      | A0A024R7I3_HUMAN (+1) | 24 kDa  | 0.0022           | BRAC1 high, Naive low | 0       | 0  | 1  | 5        | 4   | 5  |
| RAB2, member RAS oncogene family, isoform CRA_a OS=Homo sapiens GN=RAB2 PE=3 SV=1                                                        | A0A024R7V6_HUMAN (+1) | 24 kDa  | 0.66             | □                     | 3       | 2  | 1  | 5        | 3   | 6  |
| RAB14, member RAS oncogene family, isoform CRA_a OS=Homo sapiens GN=RAB14 PE=3 SV=1                                                      | A0A024R845_HUMAN (+1) | 24 kDa  | 0.18             | □                     | 3       | 2  | 5  | 8        | 8   | 7  |
| Heparan sulfate proteoglycan 2 (Perlecan), isoform CRA_b OS=Homo sapiens GN=HSPG2 PE=4 SV=1                                              | A0A024RAB6_HUMAN (+1) | 464 kDa | 0.25             | □                     | 9       | 6  | 0  | 2        | 4   | 0  |
| RAB5B, member RAS oncogene family, isoform CRA_a OS=Homo sapiens GN=RAB5B PE=3 SV=1                                                      | A0A024RB09_HUMAN (+1) | 24 kDa  | 0.6              | □                     | 3       | 2  | 0  | 1        | 2   | 4  |
| RAB21, member RAS oncogene family, isoform CRA_a OS=Homo sapiens GN=RAB21 PE=3 SV=1                                                      | A0A024RBA9_HUMAN (+1) | 24 kDa  | 0.49             | □                     | 1       | 2  | 1  | 3        | 4   | 2  |
| Ras-related protein Rab-35 (Fragment) OS=Homo sapiens GN=RAB35 PE=1 SV=1                                                                 | F5H157_HUMAN (+1)     | 21 kDa  | 0.14             | □                     | 1       | 0  | 0  | 7        | 5   | 1  |
| Ras-related protein Rab-10 OS=Homo sapiens GN=RAB10 PE=1 SV=1                                                                            | RAB10_HUMAN           | 23 kDa  | 0.072            | □                     | 2       | 1  | 3  | 14       | 13  | 6  |
| Ras-related protein Rab-25 OS=Homo sapiens GN=RAB25 PE=1 SV=2                                                                            | RAB25_HUMAN           | 23 kDa  | 0.04             | BRAC1 high, Naive low | 0       | 0  | 0  | 2        | 3   | 1  |
| Ras-related protein Rab-34 OS=Homo sapiens GN=RAB34 PE=1 SV=1                                                                            | RAB34_HUMAN (+3)      | 29 kDa  | 0.00091          | BRAC1 low, Naive high | 1       | 1  | 2  | 0        | 0   | 0  |
| Ras-related protein Rab-7a OS=Homo sapiens GN=RAB7A PE=1 SV=1                                                                            | RAB7A_HUMAN           | 23 kDa  | 0.55             | □                     | 6       | 5  | 6  | 6        | 10  | 10 |
| Ras-related protein Rab-11B OS=Homo sapiens GN=RAB11B PE=1 SV=4                                                                          | RB11B_HUMAN           | 24 kDa  | 0.57             | □                     | 5       | 2  | 2  | 3        | 6   | 2  |
| Ras-related protein Ral-A (Fragment) OS=Homo sapiens GN=RALA PE=1 SV=1                                                                   | H7C3P7_HUMAN (+1)     | 18 kDa  | 0.032            | BRAC1 high, Naive low | 0       | 1  | 2  | 9        | 8   | 5  |
| AP-1 complex subunit beta-1 OS=Homo sapiens GN=APIB1 PE=1 SV=2                                                                           | APIB1_HUMAN           | 105 kDa | 0.032            | BRAC1 high, Naive low | 3       | 2  | 3  | 9        | 15  | 12 |
| AP-2 complex subunit alpha-2 OS=Homo sapiens GN=AP2A2 PE=1 SV=2                                                                          | AP2A2_HUMAN (+1)      | 104 kDa | 0.86             | □                     | 3       | 4  | 7  | 9        | 7   | 5  |
| AP-1 complex subunit gamma-1 OS=Homo sapiens GN=APIG1 PE=1 SV=5                                                                          | APIG1_HUMAN (+2)      | 91 kDa  | 0.07             | □                     | 0       | 0  | 0  | 1        | 1   | 4  |
| AP-1 complex subunit mu-2 OS=Homo sapiens GN=AP1M2 PE=1 SV=4                                                                             | AP1M2_HUMAN (+2)      | 48 kDa  | 0.00029          | BRAC1 high, Naive low | 0       | 0  | 0  | 2        | 2   | 2  |
| AP-2 complex subunit alpha-1 OS=Homo sapiens GN=AP2A1 PE=1 SV=3                                                                          | AP2A1_HUMAN           | 108 kDa | 0.034            | BRAC1 low, Naive high | 6       | 6  | 10 | 8        | 8   | 6  |
| Basal cell adhesion molecule (Lutheran blood group) OS=Homo sapiens GN=BCAM PE=4 SV=1                                                    | A0A068W6H0_HUMAN (+6) | 67 kDa  | 0.00019          | BRAC1 high, Naive low | 0       | 0  | 0  | 16       | 13  | 17 |
| Carcinoembryonic antigen-related cell adhesion molecule 1 OS=Homo sapiens GN=CEACAM1 PE=1 SV=2                                           | CEAM1_HUMAN (+1)      | 58 kDa  | 0.0042           | BRAC1 high, Naive low | 0       | 0  | 0  | 5        | 7   | 12 |
| Epithelial cell adhesion molecule OS=Homo sapiens GN=EPCAM PE=1 SV=2                                                                     | EPCAM_HUMAN           | 35 kDa  | 0.019            | BRAC1 high, Naive low | 0       | 0  | 1  | 30       | 36  | 16 |
| Junctional adhesion molecule A OS=Homo sapiens GN=F11R PE=1 SV=1                                                                         | A0A087WY82_HUMAN (+4) | 30 kDa  | 0.0015           | BRAC1 high, Naive low | 0       | 0  | 0  | 12       | 11  | 10 |

|                                                                      |                       |         |        |                       |          |           |           |           |           |          |
|----------------------------------------------------------------------|-----------------------|---------|--------|-----------------------|----------|-----------|-----------|-----------|-----------|----------|
| Junction adhesion molecule OS=Homo sapiens PE=2 SV=1                 | Q9Y5B2_HUMAN          | 28 kDa  | 0.0046 | BRAC1 high, Naive low | 0        | 0         | 0         | <b>10</b> | <b>9</b>  | <b>7</b> |
| Cadherin-1 OS=Homo sapiens GN=CDH1 PE=1 SV=1                         | A0A087WXI5_HUMAN (+4) | 100 kDa | 0.048  | BRAC1 high, Naive low | 0        | 0         | 0         | <b>31</b> | <b>30</b> | <b>9</b> |
| Cadherin-11 OS=Homo sapiens GN=CDH11 PE=2 SV=2                       | CAD11_HUMAN (+3)      | 88 kDa  | 0.37   | []                    | 0        | 2         | 0         | 0         | 0         | 0        |
| Cadherin-13 OS=Homo sapiens GN=CDH13 PE=1 SV=1                       | CAD13_HUMAN (+2)      | 78 kDa  | 0.069  | []                    | 3        | 1         | 2         | 0         | 0         | 0        |
| Cadherin-2 OS=Homo sapiens GN=CDH2 PE=1 SV=4                         | CADH2_HUMAN (+1)      | 100 kDa | 0.005  | BRAC1 low, Naive high | <b>2</b> | <b>3</b>  | <b>6</b>  | 0         | 0         | 0        |
| Caveolin-1 OS=Homo sapiens GN=CAV1 PE=1 SV=4                         | CAV1_HUMAN (+1)       | 20 kDa  | 0.003  | BRAC1 low, Naive high | <b>9</b> | <b>7</b>  | <b>10</b> | 0         | 0         | 0        |
| Intercellular adhesion molecule 1 OS=Homo sapiens GN=ICAM1 PE=1 SV=2 | ICAM1_HUMAN (+1)      | 58 kDa  | 0.003  | BRAC1 low, Naive high | <b>7</b> | <b>11</b> | <b>10</b> | 3         | 4         | 2        |

\*Based on:

Kelly J. McKelvey et al., 2015. Exosomes: Mechanisms of Uptake. *J Circ Biomark*, 4:7.

Laura Ann Mulcahy et al., 2014. Routes and mechanisms of extracellular vesicle uptake. *Journal of Extracellular Vesicles* 3: 24641
