# Supplementary material for: Exosomes isolated from cancer patients’ sera transfer malignant traits and confer the same phenotype of primary tumors to oncosuppressor-mutated cells
Source: Springer Nature journal article supplement (doi:10.1186/s13046-017-0587-0), 2017-08-30
Supplement: MOESM4 [file 14956656]

**Supplementary Table 4. List of top 100 proteins that are often identified in exosomes (ExoCarta)**

|    | Gene Symbol | Exocarta.org          | Fibroblasts |          |
|----|-------------|-----------------------|-------------|----------|
|    |             | # of times identified | Control     | BRCA1-KO |
| 1  | CD9         | 98                    | Y           | Y        |
| 2  | HSPA8       | 97                    | N           | N        |
| 3  | PDCD6IP     | 96                    | N           | N        |
| 4  | GAPDH       | 95                    | Y           | Y        |
| 5  | ACTB        | 93                    | N           | N        |
| 6  | ANXA2       | 83                    | Y           | Y        |
| 7  | CD63        | 82                    | Y           | Y        |
| 8  | SDCBP       | 78                    | Y           | Y        |
| 9  | ENO1        | 78                    | Y           | Y        |
| 10 | HSP90AA1    | 77                    | N           | N        |
| 11 | TSG101      | 76                    | Y           | Y        |
| 12 | PKM         | 72                    | N           | N        |
| 13 | LDHA        | 72                    | N           | N        |
| 14 | EEF1A1      | 71                    | Y           | Y        |
| 15 | YWHAZ       | 69                    | Y           | Y        |
| 16 | PGK1        | 69                    | N           | N        |
| 17 | EEF2        | 69                    | Y           | Y        |
| 18 | ALDOA       | 69                    | N           | N        |
| 19 | HSP90AB1    | 67                    | Y           | Y        |
| 20 | ANXA5       | 67                    | N           | N        |
| 21 | FASN        | 66                    | Y           | Y        |
| 22 | YWHAE       | 65                    | N           | N        |
| 23 | CLTC        | 64                    | Y           | Y        |
| 24 | CD81        | 64                    | Y           | Y        |
| 25 | ALB         | 64                    | Y           | Y        |
| 26 | VCP         | 62                    | N           | N        |
| 27 | TPI1        | 62                    | N           | N        |
| 28 | PPIA        | 62                    | N           | N        |
| 29 | MSN         | 62                    | N           | N        |
| 30 | CFL1        | 62                    | N           | N        |
| 31 | PRDX1       | 61                    | Y           | Y        |
| 32 | PFN1        | 61                    | Y           | Y        |
| 33 | RAP1B       | 60                    | Y           | Y        |
| 34 | ITGB1       | 60                    | Y           | Y        |
| 35 | HSPA5       | 58                    | N           | N        |
| 36 | SLC3A2      | 57                    | Y           | Y        |
| 37 | HIST1H4A    | 57                    | N           | N        |
| 38 | GNB2        | 57                    | Y           | Y        |
| 39 | ATP1A1      | 57                    | N           | N        |
| 40 | YWHAQ       | 56                    | Y           | Y        |
| 41 | FLOT1       | 56                    | Y           | Y        |
| 42 | FLNA        | 56                    | Y           | Y        |
| 43 | CLIC1       | 56                    | N           | N        |
| 44 | CDC42       | 56                    | Y           | Y        |
| 45 | CCT2        | 56                    | N           | N        |
| 46 | A2M         | 55                    | N           | N        |
| 47 | YWHAG       | 54                    | N           | N        |
| 48 | TUBA1B      | 53                    | N           | N        |
| 49 | RAC1        | 53                    | Y           | Y        |
| 50 | LGALS3BP    | 53                    | Y           | Y        |

|     | Gene Symbol | Exocarta.org          | Fibroblasts |          |
|-----|-------------|-----------------------|-------------|----------|
|     |             | # of times identified | Control     | BRCA1-KO |
| 51  | HSPA1A      | 53                    | N           | N        |
| 52  | GNAI2       | 53                    | N           | N        |
| 53  | ANXA1       | 53                    | Y           | Y        |
| 54  | RHOA        | 52                    | Y           | Y        |
| 55  | MFGE8       | 52                    | Y           | Y        |
| 56  | PRDX2       | 51                    | N           | N        |
| 57  | GDI2        | 51                    | N           | N        |
| 58  | EHD4        | 51                    | Y           | Y        |
| 59  | ACTN4       | 51                    | Y           | Y        |
| 60  | YWHAB       | 50                    | N           | N        |
| 61  | RAB7A       | 50                    | Y           | Y        |
| 62  | LDHB        | 50                    | Y           | Y        |
| 63  | GNAS        | 50                    | Y           | Y        |
| 64  | TFR3        | 49                    | Y           | Y        |
| 65  | RAB5C       | 49                    | Y           | Y        |
| 66  | ARF1        | 49                    | Y           | Y        |
| 67  | ANXA6       | 49                    | Y           | Y        |
| 68  | ANXA11      | 49                    | N           | N        |
| 69  | ACTG1       | 49                    | N           | N        |
| 70  | KPNB1       | 48                    | Y           | Y        |
| 71  | EZR         | 48                    | Y           | Y        |
| 72  | ANXA4       | 48                    | Y           | Y        |
| 73  | ACLY        | 48                    | Y           | Y        |
| 74  | TUBA1C      | 47                    | N           | N        |
| 75  | RAB14       | 47                    | Y           | Y        |
| 76  | HIST2H4A    | 47                    | N           | N        |
| 77  | GNB1        | 47                    | Y           | Y        |
| 78  | UBA1        | 46                    | N           | N        |
| 79  | THBS1       | 46                    | Y           | Y        |
| 80  | RAN         | 46                    | Y           | Y        |
| 81  | RAB5A       | 46                    | Y           | Y        |
| 82  | PTGFRN      | 46                    | Y           | Y        |
| 83  | CCT5        | 46                    | N           | N        |
| 84  | CCT3        | 46                    | N           | N        |
| 85  | BSG         | 46                    | N           | N        |
| 86  | AHCY        | 46                    | Y           | Y        |
| 87  | RAB5B       | 45                    | N           | N        |
| 88  | RAB1A       | 45                    | N           | N        |
| 89  | LAMP2       | 45                    | N           | N        |
| 90  | ITGA6       | 45                    | Y           | Y        |
| 91  | HIST1H4B    | 45                    | N           | N        |
| 92  | GSN         | 45                    | Y           | Y        |
| 93  | FN1         | 45                    | Y           | Y        |
| 94  | YWHAH       | 44                    | Y           | Y        |
| 95  | TUBA1A      | 44                    | N           | N        |
| 96  | TKT         | 44                    | N           | N        |
| 97  | TCP1        | 44                    | Y           | Y        |
| 98  | STOM        | 44                    | Y           | Y        |
| 99  | SLC16A1     | 44                    | Y           | Y        |
| 100 | RAB8A       | 44                    | Y           | Y        |

Y: Present in our MS analyses. N: Absent in our MS analyses
