# Supplementary material for: Exosomes isolated from cancer patients’ sera transfer malignant traits and confer the same phenotype of primary tumors to oncosuppressor-mutated cells
Source: Springer Nature journal article supplement (doi:10.1186/s13046-017-0587-0), 2017-08-30
Supplement: MOESM5 [file 14956656]

**Supplementary Table 5. MS data from the exosomes as visualized on Scaffold Q+.**

| Identified Proteins                                                                                               | Alternate Name | MW      | T-Test (p-value) | Fold Change | Quantitative Profile            | Control |     | BRCA1-KO |     |
|-------------------------------------------------------------------------------------------------------------------|----------------|---------|------------------|-------------|---------------------------------|---------|-----|----------|-----|
|                                                                                                                   |                |         |                  |             |                                 | 1       | 2   | 1        | 2   |
| Major vault protein isoform A (Fragment) OS=Homo sapiens GN=MVP PE=2 SV=1                                         | MVP            | 99 kDa  | 0.098            | 0.4         | {}                              | 363     | 592 | 169      | 180 |
| sp ALBU_BOVIN                                                                                                     |                | 69 kDa  | 0.0061           | 3.6         | Fibro-BKO high, Fibro-Naive low | 101     | 124 | 367      | 355 |
| Annexin OS=Homo sapiens GN=ANXA2 PE=3 SV=1                                                                        | ANXA2          | 39 kDa  | 0.025            | 0.6         | Fibro-BKO low, Fibro-Naive high | 226     | 273 | 134      | 137 |
| Pyruvate kinase OS=Homo sapiens GN=HEL-S-30 PE=1 SV=1                                                             | HEL-S-30       | 58 kDa  | 0.014            | 0.3         | Fibro-BKO low, Fibro-Naive high | 242     | 297 | 77       | 59  |
| Tubulin alpha chain OS=Homo sapiens PE=2 SV=1                                                                     |                | 46 kDa  | 0.87             | 1           | {}                              | 162     | 135 | 133      | 124 |
| Glyceraldehyde-3-phosphate dehydrogenase OS=Homo sapiens GN=HEL-S-162eP PE=2 SV=1                                 | HEL-S-162eP    | 36 kDa  | 0.023            | 0.4         | Fibro-BKO low, Fibro-Naive high | 112     | 141 | 39       | 52  |
| Histone H4 OS=Homo sapiens GN=HIST1H4H PE=2 SV=1                                                                  | HIST1H4H       | 11 kDa  | 0.22             | 0.2         | {}                              | 173     | 68  | 21       | 19  |
| Fatty acid synthase OS=Homo sapiens GN=FASN PE=1 SV=1                                                             | FASN           | 273 kDa | 0.12             | 1.9         | {}                              | 55      | 111 | 141      | 132 |
| Heparan sulfate proteoglycan 2 (Perlecan), isoform CRA_b OS=Homo sapiens GN=HSPG2 PE=4 SV=1                       | HSPG2          | 464 kDa | 0.015            | 9.2         | Fibro-BKO high, Fibro-Naive low | 1       | 76  | 283      | 329 |
| Clathrin heavy chain OS=Homo sapiens GN=CLTC PE=1 SV=1                                                            | CLTC           | 192 kDa | 0.35             | 0.8         | {}                              | 60      | 91  | 56       | 50  |
| Thrombospondin 1, isoform CRA_a OS=Homo sapiens GN=THBS1 PE=4 SV=1                                                | THBS1          | 129 kDa | 0.0076           | 21          | Fibro-BKO high, Fibro-Naive low | 4       | 10  | 130      | 119 |
| Integrin beta OS=Homo sapiens GN=ITGB4 PE=3 SV=1                                                                  | ITGB4          | 195 kDa | 0.94             | 1           | {}                              | 52      | 64  | 46       | 58  |
| Junction plakoglobin, isoform CRA_a OS=Homo sapiens GN=JUP PE=4 SV=1                                              | JUP            | 82 kDa  | 0.81             | 1.1         | {}                              | 48      | 74  | 58       | 55  |
| Catenin delta-1 OS=Homo sapiens GN=CTNND1 PE=1 SV=2                                                               | CTNND1         | 105 kDa | 0.066            | 1.8         | {}                              | 27      | 34  | 52       | 47  |
| Chaperonin containing TCP1, subunit 2 (Beta), isoform CRA_b OS=Homo sapiens GN=HEL-S-100n PE=2 SV=1               | HEL-S-100n     | 57 kDa  | 0.073            | 0.3         | {}                              | 52      | 84  | 18       | 16  |
| Polyubiquitin-C (Fragment) OS=Homo sapiens GN=UBC PE=1 SV=1                                                       | UBC            | 17 kDa  | 0.6              | 1.2         | {}                              | 35      | 38  | 28       | 48  |
| Enolase 1, (Alpha), isoform CRA_a OS=Homo sapiens GN=ENO1 PE=2 SV=1                                               | ENO1           | 47 kDa  | 0.0014           | 0.3         | Fibro-BKO low, Fibro-Naive high | 63      | 66  | 15       | 19  |
| Epididymis luminal protein 220 OS=Homo sapiens GN=HEL-S-70 PE=2 SV=1                                              | HEL-S-70       | 89 kDa  | 0.012            | 1.3         | Fibro-BKO high, Fibro-Naive low | 32      | 33  | 36       | 40  |
| Histone H3 OS=Homo sapiens GN=H3F3A PE=2 SV=1                                                                     | H3F3A          | 15 kDa  | 0.0084           | 0.5         | Fibro-BKO low, Fibro-Naive high | 51      | 55  | 27       | 25  |
| cDNA FLJ54370, highly similar to Heat shock 70 kDa protein 1 OS=Homo sapiens PE=2 SV=1                            |                | 67 kDa  | 0.0042           | 0.6         | Fibro-BKO low, Fibro-Naive high | 47      | 48  | 25       | 26  |
| Annexin (Fragment) OS=Homo sapiens GN=ANXA4 PE=2 SV=1                                                             | ANXA4          | 36 kDa  | 0.029            | 0.3         | Fibro-BKO low, Fibro-Naive high | 55      | 47  | 14       | 17  |
| cDNA FLJ53573, highly similar to Myosin Ic OS=Homo sapiens PE=2 SV=1                                              |                | 119 kDa | 0.31             | 0.9         | {}                              | 30      | 39  | 25       | 28  |
| Annexin OS=Homo sapiens GN=HEL-S-7 PE=2 SV=1                                                                      | HEL-S-7        | 36 kDa  | 0.1              | 0.4         | {}                              | 52      | 38  | 16       | 21  |
| Agrin OS=Homo sapiens GN=AGRN PE=1 SV=1                                                                           | AGRN           | 202 kDa | 0.36             | 2.1         | {}                              | 3       | 42  | 46       | 36  |
| Actinin alpha 4 isoform 1 (Fragment) OS=Homo sapiens GN=ACTN4 PE=2 SV=1                                           | ACTN4          | 105 kDa | 0.024            | 0.6         | Fibro-BKO low, Fibro-Naive high | 51      | 61  | 28       | 32  |
| Elongation factor 1-alpha (Fragment) OS=Homo sapiens PE=2 SV=1                                                    |                | 50 kDa  | 0.16             | 0.5         | {}                              | 80      | 52  | 27       | 25  |
| Tetraspanin (Fragment) OS=Homo sapiens PE=2 SV=1                                                                  |                | 26 kDa  | 0.044            | 0.4         | Fibro-BKO low, Fibro-Naive high | 31      | 31  | 10       | 14  |
| Annexin OS=Homo sapiens GN=ANXA1 PE=2 SV=1                                                                        | ANXA1          | 39 kDa  | 0.76             | 0.9         | {}                              | 24      | 45  | 26       | 29  |
| HCG1991735, isoform CRA_a OS=Homo sapiens GN=hCG_1991735 PE=4 SV=1                                                | hCG_1991735    | 189 kDa | 0.28             | 0.8         | {}                              | 29      | 36  | 17       | 27  |
| Myosin, heavy polypeptide 9, non-muscle, isoform CRA_a OS=Homo sapiens GN=MYH9 PE=3 SV=1                          | MYH9           | 227 kDa | 0.33             | 1.1         | {}                              | 38      | 42  | 35       | 44  |
| Poly [ADP-ribose] polymerase OS=Homo sapiens PE=2 SV=1                                                            |                | 113 kDa | 0.083            | 0.4         | {}                              | 31      | 47  | 15       | 9   |
| Epithelial cell adhesion molecule OS=Homo sapiens GN=EPCAM PE=1 SV=1                                              | EPCAM          | 38 kDa  | 0.61             | 0.9         | {}                              | 34      | 28  | 21       | 25  |
| Catenin (Cadherin-associated protein), beta 1, 88kDa, isoform CRA_a OS=Homo sapiens GN=CTNNB1 PE=4 SV=1           | CTNNB1         | 85 kDa  | 0.15             | 1.3         | {}                              | 25      | 35  | 33       | 36  |
| 4F2 cell-surface antigen heavy chain OS=Homo sapiens GN=SLC3A2 PE=1 SV=1                                          | SLC3A2         | 65 kDa  | 0.48             | 1.1         | {}                              | 25      | 30  | 30       | 25  |
| cDNA, FLJ94213, highly similar to Homo sapiens pregnancy-zone protein (PZP), mRNA OS=Homo sapiens PE=2 SV=1       |                | 164 kDa | 0.0038           | 4           | Fibro-BKO high, Fibro-Naive low | 9       | 12  | 37       | 37  |
| Testicular secretory protein Li 63 OS=Homo sapiens GN=UBE1 PE=2 SV=1                                              | UBE1           | 118 kDa | 0.0094           | 0.5         | Fibro-BKO low, Fibro-Naive high | 35      | 41  | 14       | 17  |
| Integrin alpha-2 OS=Homo sapiens GN=ITGA2 PE=1 SV=1                                                               | ITGA2          | 103 kDa | 0.98             | 1           | {}                              | 18      | 35  | 22       | 25  |
| Lectin galactoside-binding soluble 3 binding protein isoform 1 (Fragment) OS=Homo sapiens GN=LGALS3BP PE=2 SV=1   | LGALS3BP       | 65 kDa  | 0.16             | 1.2         | {}                              | 89      | 90  | 94       | 89  |
| EEF2 protein (Fragment) OS=Homo sapiens GN=EEF2 PE=2 SV=1                                                         | EEF2           | 65 kDa  | 0.028            | 0.6         | Fibro-BKO low, Fibro-Naive high | 29      | 30  | 12       | 17  |
| Aldehyde dehydrogenase 1 family, member A1, isoform CRA_a OS=Homo sapiens GN=HEL-S-53e PE=2 SV=1                  | HEL-S-53e      | 55 kDa  | 0.049            | 0.6         | Fibro-BKO low, Fibro-Naive high | 32      | 29  | 17       | 17  |
| Heat shock protein 90kDa alpha (Cytosolic), class B member 1, isoform CRA_a OS=Homo sapiens GN=HSP90AB1 PE=3 SV=1 | HSP90AB1       | 83 kDa  | 0.018            | 0.7         | Fibro-BKO low, Fibro-Naive high | 42      | 42  | 23       | 27  |
| Galectin OS=Homo sapiens GN=LGALS4 PE=2 SV=1                                                                      | LGALS4         | 36 kDa  | 0.038            | 0.5         | Fibro-BKO low, Fibro-Naive high | 25      | 31  | 11       | 13  |
| Collagen alpha-1(VI) chain OS=Homo sapiens GN=COL6A1 PE=1 SV=1                                                    | COL6A1         | 108 kDa | 0.015            | 14          | Fibro-BKO high, Fibro-Naive low | 3       | 3   | 41       | 35  |
| Sodium/potassium-transporting ATPase subunit alpha (Fragment) OS=Homo sapiens PE=2 SV=1                           |                | 112 kDa | 0.11             | 0.7         | {}                              | 41      | 54  | 28       | 32  |
| Chaperonin containing TCP1, subunit 8 (Theta) variant (Fragment) OS=Homo sapiens PE=2 SV=1                        |                | 60 kDa  | 0.29             | 0.8         | {}                              | 20      | 23  | 17       | 12  |
| Protocadherin Fat 1 OS=Homo sapiens GN=FAT1 PE=1 SV=1                                                             | FAT1           | 506 kDa | 0.0067           | 9.4         | Fibro-BKO high, Fibro-Naive low | 2       | 6   | 30       | 33  |
| SNRNP200 protein (Fragment) OS=Homo sapiens GN=SNRNP200 PE=2 SV=1                                                 | SNRNP200       | 216 kDa | 0.4              | 0.7         | {}                              | 16      | 28  | 16       | 11  |
| Chaperonin containing TCP1, subunit 7 (Eta) variant (Fragment) OS=Homo sapiens PE=2 SV=1                          |                | 59 kDa  | 0.13             | 0.6         | {}                              | 25      | 21  | 14       | 11  |
| Cofilin 1 (Non-muscle), isoform CRA_b OS=Homo sapiens GN=HEL-S-15 PE=2 SV=1                                       | HEL-S-15       | 19 kDa  | 0.16             | 0.6         | {}                              | 31      | 23  | 14       | 15  |
| T-complex protein 1 subunit delta OS=Homo sapiens PE=2 SV=1                                                       |                | 58 kDa  | 0.14             | 0.5         | {}                              | 32      | 23  | 12       | 14  |
| Isoleucyl-tRNA synthetase, cytoplasmic variant (Fragment) OS=Homo sapiens PE=2 SV=1                               |                | 146 kDa | 0.39             | 0.9         | {}                              | 18      | 17  | 14       | 15  |
| Peptidyl-prolyl cis-trans isomerase OS=Homo sapiens PE=2 SV=1                                                     |                | 18 kDa  | 0.11             | 0.4         | {}                              | 34      | 23  | 9        | 10  |
| Histone H2A OS=Homo sapiens GN=H2AFY PE=1 SV=1                                                                    | H2AFY          | 18 kDa  | 0.033            | 0.2         | Fibro-BKO low, Fibro-Naive high | 71      | 59  | 17       | 11  |
| Keratin 18, isoform CRA_a OS=Homo sapiens GN=KRT18 PE=3 SV=1                                                      | KRT18          | 48 kDa  | 0.13             | 0.3         | {}                              | 30      | 20  | 7        | 9   |
| Tetraspanin OS=Homo sapiens GN=CD81 PE=3 SV=1                                                                     | CD81           | 26 kDa  | 0.3              | 0.7         | {}                              | 28      | 19  | 16       | 13  |
| Chaperonin containing TCP1, subunit 6A (Zeta 1), isoform CRA_a OS=Homo sapiens GN=CCT6A PE=3 SV=1                 | CCT6A          | 58 kDa  | 0.33             | 0.6         | {}                              | 19      | 29  | 8        | 19  |

|                                                                                                                                             |            |         |         |      |                                 |    |    |     |     |
|---------------------------------------------------------------------------------------------------------------------------------------------|------------|---------|---------|------|---------------------------------|----|----|-----|-----|
| Bumetanide-sensitive Na-K-Cl cotransporter OS=Homo sapiens GN=SLC12A2 PE=2 SV=1                                                             | SLC12A2    | 131 kDa | 0.26    | 1.6  | 0                               | 12 | 18 | 24  | 17  |
| GNAS complex locus isoform 1 (Fragment) OS=Homo sapiens GN=GNAS PE=2 SV=1                                                                   | GNAS       | 46 kDa  | 0.14    | 1.7  | 0                               | 16 | 14 | 25  | 20  |
| Cell division cycle 42 (GTP binding protein, 25kDa), isoform CRA_a OS=Homo sapiens GN=CDC42 PE=4 SV=1                                       | CDC42      | 21 kDa  | 0.044   | 0.4  | Fibro-BKO low, Fibro-Naive high | 24 | 21 | 6   | 10  |
| Suppressor of tumorigenicity 14 protein homolog OS=Homo sapiens PE=2 SV=1                                                                   |            | 95 kDa  | 0.33    | 1.3  | 0                               | 12 | 22 | 20  | 20  |
| T-complex protein 1 subunit gamma OS=Homo sapiens PE=2 SV=1                                                                                 |            | 58 kDa  | 0.087   | 0.7  | 0                               | 20 | 18 | 11  | 13  |
| Barrier to autointegration factor 1, isoform CRA_a OS=Homo sapiens GN=BANF1 PE=4 SV=1                                                       | BANF1      | 10 kDa  | 0.19    | 0.05 | 0                               | 33 | 12 | 0   | 2   |
| Collagen alpha-1(XII) chain OS=Homo sapiens GN=COL12A1 PE=1 SV=1                                                                            | COL12A1    | 333 kDa | 0.00087 | INF  | Fibro-BKO high, Fibro-Naive low | 0  | 0  | 84  | 96  |
| ADAM metalloproteinase domain 10, isoform CRA_b OS=Homo sapiens GN=ADAM10 PE=4 SV=1                                                         | ADAM10     | 84 kDa  | 0.3     | 1.2  | 0                               | 13 | 19 | 18  | 17  |
| Epididymis secretory protein Li 45 OS=Homo sapiens GN=HEL-S-45 PE=2 SV=1                                                                    | HEL-S-45   | 77 kDa  | 0.16    | 0.7  | 0                               | 18 | 24 | 14  | 13  |
| IgGfC-binding protein OS=Homo sapiens GN=FCGBP PE=1 SV=1                                                                                    | FCGBP      | 445 kDa | 0.0026  | INF  | Fibro-BKO high, Fibro-Naive low | 0  | 0  | 36  | 35  |
| Epididymis tissue sperm binding protein Li 3a OS=Homo sapiens PE=2 SV=1                                                                     |            | 35 kDa  | 0.048   | 0.4  | 0                               | 31 | 25 | 9   | 10  |
| Myosin-14 (Fragment) OS=Homo sapiens GN=MYH14 PE=1 SV=8                                                                                     | MYH14      | 114 kDa | 0.017   | 0.5  | Fibro-BKO low, Fibro-Naive high | 30 | 35 | 15  | 13  |
| Epididymis luminal protein 33 OS=Homo sapiens GN=HEL-S-72p PE=2 SV=1                                                                        | HEL-S-72p  | 71 kDa  | 0.26    | 0.8  | 0                               | 67 | 60 | 48  | 48  |
| 60S ribosomal protein L6 OS=Homo sapiens GN=RPL6 PE=3 SV=1                                                                                  | RPL6       | 33 kDa  | 0.037   | 0.3  | Fibro-BKO low, Fibro-Naive high | 25 | 21 | 5   | 8   |
| Ezrin OS=Homo sapiens GN=EZR PE=1 SV=3                                                                                                      | EZR        | 69 kDa  | 0.95    | 1    | 0                               | 22 | 24 | 15  | 27  |
| PTGFRN protein (Fragment) OS=Homo sapiens GN=PTGFRN PE=2 SV=1                                                                               | PTGFRN     | 88 kDa  | 0.088   | 2.1  | 0                               | 7  | 15 | 21  | 20  |
| Proteasome 26S non-ATPase subunit 2 variant (Fragment) OS=Homo sapiens PE=2 SV=1                                                            |            | 101 kDa | 0.37    | 1.2  | 0                               | 15 | 17 | 14  | 19  |
| L-lactate dehydrogenase OS=Homo sapiens GN=HEL-S-133P PE=2 SV=1                                                                             | HEL-S-133P | 37 kDa  | 0.003   | 0.3  | Fibro-BKO low, Fibro-Naive high | 22 | 24 | 7   | 6   |
| Phosphoglycerate kinase OS=Homo sapiens GN=HEL-S-68p PE=2 SV=1                                                                              | HEL-S-68p  | 45 kDa  | 0.35    | 0.9  | 0                               | 20 | 19 | 16  | 15  |
| sp K1C10_HUMAN                                                                                                                              |            | 59 kDa  | 0.65    | 1.5  | 0                               | 12 | 13 | 6   | 28  |
| Epididymis luminal protein 4 OS=Homo sapiens GN=YWHAZ PE=2 SV=1                                                                             | YWHAZ      | 28 kDa  | 0.021   | 0.5  | Fibro-BKO low, Fibro-Naive high | 22 | 20 | 10  | 10  |
| Fructose-bisphosphate aldolase OS=Homo sapiens GN=HEL-S-87p PE=2 SV=1                                                                       | HEL-S-87p  | 39 kDa  | 0.16    | 0.7  | 0                               | 23 | 21 | 11  | 14  |
| Tetraspanin OS=Homo sapiens GN=CD9 PE=1 SV=1                                                                                                | CD9        | 18 kDa  | 0.037   | 1.8  | Fibro-BKO high, Fibro-Naive low | 13 | 11 | 20  | 19  |
| Collagen alpha-2(I) chain OS=Homo sapiens GN=COL1A2 PE=1 SV=1                                                                               | COL1A2     | 129 kDa | 0.0016  | INF  | Fibro-BKO high, Fibro-Naive low | 0  | 0  | 30  | 35  |
| Histone 1, H1e OS=Homo sapiens GN=HIST1H1E PE=2 SV=1                                                                                        | HIST1H1E   | 22 kDa  | 0.052   | 0.1  | 0                               | 28 | 20 | 2   | 4   |
| T-complex protein 1 subunit alpha OS=Homo sapiens GN=TCP1 PE=1 SV=1                                                                         | TCP1       | 44 kDa  | 0.017   | 0.4  | Fibro-BKO low, Fibro-Naive high | 26 | 24 | 8   | 10  |
| Flotillin 1 variant (Fragment) OS=Homo sapiens PE=2 SV=1                                                                                    |            | 47 kDa  | 0.21    | 1.6  | 0                               | 10 | 15 | 20  | 15  |
| ITGAV protein OS=Homo sapiens GN=ITGAV PE=2 SV=1                                                                                            | ITGAV      | 116 kDa | 0.13    | 1.5  | 0                               | 11 | 14 | 14  | 19  |
| CD133 isoform H OS=Homo sapiens GN=CD133 PE=2 SV=1                                                                                          | CD133      | 96 kDa  | 0.09    | 2.9  | 0                               | 3  | 13 | 19  | 21  |
| Fibronectin 1, isoform CRA_n OS=Homo sapiens GN=FN1 PE=4 SV=1                                                                               | FN1        | 259 kDa | 0.001   | 44   | Fibro-BKO high, Fibro-Naive low | 11 | 25 | 676 | 688 |
| Glucosaminyl (N-acetyl) transferase 3, mucin type, isoform CRA_a OS=Homo sapiens GN=GCNT3 PE=4 SV=1                                         | GCNT3      | 51 kDa  | 0.87    | 1    | 0                               | 16 | 15 | 13  | 15  |
| Chromosome 9 open reading frame 88, isoform CRA_a OS=Homo sapiens GN=C9orf88 PE=4 SV=1                                                      | C9orf88    | 83 kDa  | 0.48    | 1.2  | 0                               | 10 | 15 | 14  | 12  |
| Immunoglobulin light chain (Fragment) OS=Homo sapiens PE=1 SV=1                                                                             |            | 24 kDa  | 0.19    | 64   | 0                               | 1  | 0  | 14  | 46  |
| ATP-citrate synthase OS=Homo sapiens GN=ACLY PE=3 SV=1                                                                                      | ACLY       | 121 kDa | 0.16    | 1.4  | 0                               | 13 | 11 | 13  | 17  |
| Glucose-6-phosphate 1-dehydrogenase OS=Homo sapiens PE=2 SV=1                                                                               |            | 59 kDa  | 0.13    | 0.4  | 0                               | 25 | 16 | 5   | 8   |
| Tetraspanin (Fragment) OS=Homo sapiens GN=KAI1 PE=2 SV=1                                                                                    | KAI1       | 30 kDa  | 0.6     | 0.9  | 0                               | 18 | 12 | 11  | 12  |
| Collagen, type VI, alpha 3 OS=Homo sapiens GN=COL6A3 PE=4 SV=1                                                                              | COL6A3     | 344 kDa | 0.00011 | 97   | Fibro-BKO high, Fibro-Naive low | 0  | 5  | 200 | 213 |
| cDNA FLJ44754 fis, clone BRACE3030748, highly similar to Guanine nucleotide-binding protein G(i), alpha-2 subunit OS=Homo sapiens PE=2 SV=1 |            | 35 kDa  | 0.48    | 1.2  | 0                               | 14 | 15 | 17  | 13  |
| Dopamine receptor interacting protein 4 OS=Homo sapiens GN=DRIP4 PE=2 SV=1                                                                  | DRIP4      | 96 kDa  | 0.05    | 1.3  | 0                               | 48 | 59 | 62  | 62  |
| Laminin, gamma 1 (Formerly LAMB2), isoform CRA_a OS=Homo sapiens GN=LAMC1 PE=4 SV=1                                                         | LAMC1      | 174 kDa | 0.0047  | 67   | Fibro-BKO high, Fibro-Naive low | 0  | 1  | 26  | 32  |
| Triosephosphate isomerase OS=Homo sapiens GN=HEL-S-49 PE=2 SV=1                                                                             | HEL-S-49   | 27 kDa  | 0.18    | 0.5  | 0                               | 23 | 14 | 7   | 8   |
| RuvB-like helicase (Fragment) OS=Homo sapiens GN=RUVBL1 PE=2 SV=1                                                                           | RUVBL1     | 50 kDa  | 0.016   | 0.3  | Fibro-BKO low, Fibro-Naive high | 21 | 19 | 6   | 6   |
| Glucose-6-phosphate isomerase (Fragment) OS=Homo sapiens GN=GPI PE=1 SV=1                                                                   | GPI        | 65 kDa  | 0.081   | 0.4  | 0                               | 21 | 16 | 5   | 8   |
| cDNA FLJ78483, highly similar to Homo sapiens elongation factor Tu GTP binding domain containing 2 (EFTUD2), mRNA OS=Homo sapiens PE=2 SV=1 |            | 109 kDa | 0.0062  | 0.3  | Fibro-BKO low, Fibro-Naive high | 20 | 20 | 4   | 6   |
| Annexin OS=Homo sapiens PE=2 SV=1                                                                                                           |            | 46 kDa  | 0.046   | 0.9  | Fibro-BKO low, Fibro-Naive high | 14 | 15 | 11  | 11  |
| Protein arginine N-methyltransferase 1 OS=Homo sapiens GN=PRMT1 PE=1 SV=1                                                                   | PRMT1      | 38 kDa  | 0.11    | 0.5  | 0                               | 19 | 15 | 9   | 7   |
| EPRS protein (Fragment) OS=Homo sapiens GN=EPRS PE=2 SV=1                                                                                   | EPRS       | 110 kDa | 0.86    | 1    | 0                               | 10 | 17 | 11  | 14  |
| Keratin 1 OS=Homo sapiens GN=KRT1 PE=3 SV=1                                                                                                 | KRT1       | 66 kDa  | 0.92    | 0.9  | 0                               | 12 | 19 | 5   | 21  |
| Vacuolar protein sorting 37B (Yeast), isoform CRA_b OS=Homo sapiens GN=VPS37B PE=4 SV=1                                                     | VPS37B     | 31 kDa  | 0.14    | 1.2  | 0                               | 11 | 12 | 13  | 12  |
| Proteasome subunit alpha type OS=Homo sapiens GN=HEL-S-276 PE=2 SV=1                                                                        | HEL-S-276  | 28 kDa  | 0.1     | 1.6  | 0                               | 10 | 8  | 11  | 14  |
| Programmed cell death 6 variant (Fragment) OS=Homo sapiens PE=2 SV=1                                                                        |            | 22 kDa  | 0.093   | 0.5  | 0                               | 28 | 20 | 11  | 11  |
| Epididymis secretory protein Li 1 OS=Homo sapiens GN=HEL-S-1 PE=2 SV=1                                                                      | HEL-S-1    | 28 kDa  | 0.16    | 0.8  | 0                               | 13 | 14 | 9   | 12  |
| SF3B1 protein (Fragment) OS=Homo sapiens GN=SF3B1 PE=2 SV=1                                                                                 | SF3B1      | 87 kDa  | 0.018   | 0.3  | Fibro-BKO low, Fibro-Naive high | 15 | 19 | 5   | 4   |
| EH domain-containing protein 1 OS=Homo sapiens GN=EHD1 PE=1 SV=1                                                                            | EHD1       | 62 kDa  | 0.013   | 1.7  | Fibro-BKO high, Fibro-Naive low | 10 | 12 | 17  | 17  |
| EH-domain containing 4, isoform CRA_a OS=Homo sapiens GN=EHD4 PE=3 SV=1                                                                     | EHD4       | 61 kDa  | 0.054   | 1.5  | 0                               | 9  | 12 | 14  | 14  |
| RAB7, member RAS oncogene family, isoform CRA_a OS=Homo sapiens GN=RAB7A PE=2 SV=1                                                          | RAB7A      | 23 kDa  | 0.51    | 0.8  | 0                               | 14 | 13 | 6   | 13  |
| cDNA FLJ93545, highly similar to Homo sapiens 5-aminoimidazole-4-carboxamide ribonucleotide formyltransferase/IMP cyclohydrolase (AT        |            | 65 kDa  | 0.0037  | 0.8  | Fibro-BKO low, Fibro-Naive high | 13 | 14 | 9   | 10  |
| cDNA FLJ54622, highly similar to Prothrombin (EC 3.4.21.5) OS=Homo sapiens PE=2 SV=1                                                        |            | 53 kDa  | 0.0036  | 3    | Fibro-BKO high, Fibro-Naive low | 6  | 7  | 17  | 17  |
| Cytoplasmic FMR1 interacting protein 1 isoform A (Fragment) OS=Homo sapiens GN=CYFIP1 PE=2 SV=1                                             | CYFIP1     | 145 kDa | 0.18    | 1.4  | 0                               | 10 | 9  | 10  | 14  |

|                                                                                                                                          |           |         |        |     |                                 |        |    |    |    |
|------------------------------------------------------------------------------------------------------------------------------------------|-----------|---------|--------|-----|---------------------------------|--------|----|----|----|
| Putative uncharacterized protein XRCC5 (Fragment) OS=Homo sapiens GN=XRCC5 PE=4 SV=1                                                     | XRCC5     | 64 kDa  | 0.063  | 0.3 | 0                               | 17     | 15 | 6  | 2  |
| cDNA FLJ95508, highly similar to Homo sapiens 5'-nucleotidase, ecto (CD73) (NT5E), mRNA OS=Homo sapiens PE=2 SV=1                        |           | 63 kDa  | 0.48   | 0.9 | 0                               | 11     | 12 | 10 | 8  |
| Lipolysis-stimulated lipoprotein receptor OS=Homo sapiens GN=LSR PE=1 SV=2                                                               | LSR       | 66 kDa  | 0.3    | 1.5 | 0                               | 9      | 13 | 11 | 19 |
| Apolipoprotein B (Including Ag(X) antigen) OS=Homo sapiens GN=APOB PE=4 SV=1                                                             | APOB      | 516 kDa | 0.062  | 2.8 | 0                               | 3      | 6  | 12 | 10 |
| cDNA FLJ61188, highly similar to Basigin OS=Homo sapiens PE=2 SV=1                                                                       |           | 28 kDa  | 0.88   | 1   | 0                               | 12     | 12 | 9  | 12 |
| Integrin alpha-6 (Fragment) OS=Homo sapiens GN=ITGA6 PE=1 SV=1                                                                           | ITGA6     | 26 kDa  | 0.25   | 2   | 0                               | 6      | 9  | 9  | 18 |
| 40S ribosomal protein S8 OS=Homo sapiens GN=RPS8 PE=2 SV=1                                                                               | RPS8      | 24 kDa  | 0.29   | 0.5 | 0                               | 17     | 11 | 8  | 4  |
| Proteasome subunit alpha type OS=Homo sapiens GN=PSMA2 PE=1 SV=1                                                                         | PSMA2     | 26 kDa  | 0.29   | 1.1 | 0                               | 11     | 12 | 12 | 11 |
| Coagulation factor V OS=Homo sapiens GN=F5 PE=1 SV=1                                                                                     | F5        | 252 kDa | 0.16   | 2.7 | 0                               | 7      | 4  | 16 | 10 |
| cDNA FLJ76654, highly similar to Homo sapiens CD44 antigen (homing function and Indian blood group system) (CD44), transcript variant 4, |           | 39 kDa  | 0.83   | 1   | 0                               | 10     | 15 | 12 | 11 |
| cDNA FLJ78677, highly similar to Homo sapiens splicing factor 3b, subunit 3, 130kDa (SF3B3), mRNA OS=Homo sapiens PE=2 SV=1              |           | 136 kDa | 0.0043 | 0.3 | Fibro-BKO low, Fibro-Naive high | 17     | 19 | 5  | 4  |
| Epididymis luminal secretory protein 52 OS=Homo sapiens GN=EL52 PE=2 SV=1                                                                | EL52      | 85 kDa  | 0.23   | 0.6 | 0                               | 17     | 28 | 11 | 14 |
| Epididymis luminal protein 2 OS=Homo sapiens GN=HEL2 PE=1 SV=1                                                                           | HEL2      | 29 kDa  | 0.054  | 0.4 | 0                               | 16     | 13 | 5  | 6  |
| Epididymis secretory protein Li 22 OS=Homo sapiens GN=HEL-S-22 PE=2 SV=1                                                                 | HEL-S-22  | 23 kDa  | 0.0002 | 0.3 | Fibro-BKO low, Fibro-Naive high | 26     | 28 | 7  | 8  |
| Protein tweety homolog OS=Homo sapiens GN=TTYH3 PE=3 SV=1                                                                                | TTYH3     | 58 kDa  | 0.014  | 1.5 | Fibro-BKO high, Fibro-Naive low | 9      | 10 | 12 | 14 |
| Chloride intracellular channel protein (Fragment) OS=Homo sapiens PE=2 SV=1                                                              |           | 27 kDa  | 0.23   | 0.6 | 0                               | 15     | 10 | 7  | 6  |
| Transgelin-2 (Fragment) OS=Homo sapiens GN=TAGLN2 PE=1 SV=1                                                                              | TAGLN2    | 21 kDa  | 0.2    | 0.6 | 0                               | 16     | 11 | 7  | 7  |
| ARP3 actin-related protein 3 homolog (Yeast), isoform CRA_a OS=Homo sapiens GN=ACTR3 PE=3 SV=1                                           | ACTR3     | 47 kDa  | 0.0011 | 0.2 | Fibro-BKO low, Fibro-Naive high | 16     | 17 | 3  | 4  |
| Ferritin OS=Homo sapiens GN=FTH1 PE=3 SV=1                                                                                               | FTH1      | 21 kDa  | 0.0061 | 1.5 | Fibro-BKO high, Fibro-Naive low | 8      | 8  | 10 | 11 |
| cDNA FLJ76789, highly similar to Homo sapiens methionine-tRNA synthetase (MARS), mRNA OS=Homo sapiens PE=2 SV=1                          |           | 101 kDa | 0.15   | 0.7 | 0                               | 15     | 13 | 7  | 10 |
| Adenylyl cyclase-associated protein OS=Homo sapiens PE=2 SV=1                                                                            |           | 52 kDa  | 0.0018 | 0.3 | Fibro-BKO low, Fibro-Naive high | 0.0018 | 15 | 17 | 4  |
| WD repeat domain 1, isoform CRA_a (Fragment) OS=Homo sapiens GN=WDR1 PE=2 SV=1                                                           | WDR1      | 66 kDa  | 0.49   | 0.9 | 0                               | 10     | 15 | 9  | 10 |
| Gelsolin OS=Homo sapiens GN=GSN PE=1 SV=1                                                                                                | GSN       | 83 kDa  | 0.41   | 1.1 | 0                               | 10     | 11 | 9  | 12 |
| Testicular tissue protein Li 192 OS=Homo sapiens PE=2 SV=1                                                                               |           | 57 kDa  | 0.55   | 0.9 | 0                               | 10     | 9  | 6  | 9  |
| MARCKS protein (Fragment) OS=Homo sapiens GN=MARCKS PE=2 SV=1                                                                            | MARCKS    | 15 kDa  | 0.39   | 1.5 | 0                               | 7      | 10 | 8  | 15 |
| Histone H2A OS=Homo sapiens GN=H2AFY PE=1 SV=1                                                                                           | H2AFY     | 22 kDa  | 0.055  | 0   | 0                               | 20     | 13 | 0  | 0  |
| cDNA FLJ77762, highly similar to Homo sapiens cullin-associated and neddylation-dissociated 1 (CAND1), mRNA OS=Homo sapiens PE=2 SV=1    |           | 136 kDa | 0.2    | 0.7 | 0                               | 10     | 15 | 7  | 8  |
| cDNA, FLJ95650, highly similar to Homo sapiens karyopherin (importin) beta 1 (KPNB1), mRNA OS=Homo sapiens PE=2 SV=1                     |           | 97 kDa  | 0.11   | 0.7 | 0                               | 12     | 12 | 8  | 6  |
| COPG protein (Fragment) OS=Homo sapiens GN=COPG PE=2 SV=2                                                                                | COPG      | 78 kDa  | 0.13   | 0.5 | 0                               | 19     | 16 | 10 | 6  |
| Solute carrier family 44, member 1, isoform CRA_a OS=Homo sapiens GN=SLC44A1 PE=3 SV=1                                                   | SLC44A1   | 73 kDa  | 0.068  | 4.1 | 0                               | 4      | 4  | 17 | 12 |
| Testicular tissue protein Li 96 OS=Homo sapiens PE=2 SV=1                                                                                |           | 117 kDa | 0.29   | 1.6 | 0                               | 6      | 6  | 6  | 11 |
| Ras-related C3 botulinum toxin substrate 1 (Rho family, small GTP binding protein Rac1) OS=Homo sapiens GN=RAC1 PE=2 SV=1                | RAC1      | 23 kDa  | 0.54   | 1.1 | 0                               | 10     | 9  | 8  | 11 |
| 40S ribosomal protein S4 OS=Homo sapiens GN=RPS4X PE=2 SV=1                                                                              | RPS4X     | 30 kDa  | 0.35   | 0.6 | 0                               | 12     | 7  | 5  | 6  |
| cDNA FLJ39263 fis, clone OCBBF2009571, highly similar to ATP-dependent RNA helicase A (EC 3.6.1.1) OS=Homo sapiens PE=2 SV=1             |           | 60 kDa  | 0.27   | 0.6 | 0                               | 15     | 9  | 5  | 7  |
| Laminin subunit beta-1 OS=Homo sapiens GN=LAMB1 PE=1 SV=1                                                                                | LAMB1     | 200 kDa | 0.0083 | INF | Fibro-BKO high, Fibro-Naive low | 0      | 0  | 17 | 22 |
| Vinculin, isoform CRA_c OS=Homo sapiens GN=VCL PE=4 SV=1                                                                                 | VCL       | 117 kDa | 0.07   | 2.5 | 0                               | 4      | 8  | 14 | 12 |
| cDNA FLJ56274, highly similar to Transketolase (EC 2.2.1.1) OS=Homo sapiens PE=2 SV=1                                                    |           | 63 kDa  | 0.19   | 0.6 | 0                               | 10     | 15 | 7  | 7  |
| Epididymis secretory sperm binding protein Li 62p OS=Homo sapiens GN=HEL-S-62p PE=2 SV=1                                                 | HEL-S-62p | 187 kDa | 0.076  | 2.4 | 0                               | 7      | 4  | 13 | 11 |
| Epididymis luminal protein 70 OS=Homo sapiens GN=HEL70 PE=2 SV=1                                                                         | HEL70     | 68 kDa  | 0.86   | 1   | 0                               | 15     | 17 | 11 | 19 |
| Ribosomal protein L7, isoform CRA_a OS=Homo sapiens GN=RPL7 PE=4 SV=1                                                                    | RPL7      | 30 kDa  | 0.01   | 0.2 | Fibro-BKO low, Fibro-Naive high | 15     | 14 | 3  | 2  |
| Valyl-tRNA synthetase, isoform CRA_a OS=Homo sapiens GN=VARS PE=3 SV=1                                                                   | VARS      | 140 kDa | 0.17   | 0.7 | 0                               | 12     | 11 | 8  | 6  |
| Glycyl-tRNA synthetase OS=Homo sapiens GN=GARS PE=4 SV=1                                                                                 | GARS      | 78 kDa  | 0.057  | 0.9 | 0                               | 10     | 11 | 8  | 8  |
| EEF1G protein OS=Homo sapiens GN=EEF1G PE=2 SV=1                                                                                         | EEF1G     | 50 kDa  | 0.15   | 0.7 | 0                               | 12     | 10 | 7  | 7  |
| L-lactate dehydrogenase OS=Homo sapiens GN=LDHB PE=2 SV=1                                                                                | LDHB      | 37 kDa  | 0.037  | 0.5 | Fibro-BKO low, Fibro-Naive high | 13     | 17 | 6  | 7  |
| sp TRYP_PIG                                                                                                                              |           | 24 kDa  | 0.54   | 0.8 | 0                               | 12     | 8  | 5  | 9  |
| NAD(P)H dehydrogenase [quinone] 1 OS=Homo sapiens GN=NQO1 PE=1 SV=1                                                                      | NQO1      | 23 kDa  | 0.087  | 0.3 | 0                               | 19     | 13 | 3  | 5  |
| GTP-binding nuclear protein Ran OS=Homo sapiens GN=RAN PE=1 SV=1                                                                         | RAN       | 26 kDa  | 0.028  | 0.3 | Fibro-BKO low, Fibro-Naive high | 14     | 12 | 4  | 4  |
| 2',3'-cyclic-nucleotide 3'-phosphodiesterase OS=Homo sapiens GN=CNP PE=3 SV=1                                                            | CNP       | 45 kDa  | 0.95   | 1   | 0                               | 10     | 9  | 9  | 8  |
| GNB2 protein OS=Homo sapiens GN=GNB2 PE=2 SV=1                                                                                           | GNB2      | 37 kDa  | 0.029  | 1.3 | Fibro-BKO high, Fibro-Naive low | 11     | 12 | 13 | 13 |
| Mutant hemoglobin alpha 2 globin chain OS=Homo sapiens GN=HBA2 PE=3 SV=1                                                                 | HBA2      | 15 kDa  | 0.15   | 1.8 | 0                               | 6      | 5  | 7  | 11 |
| cDNA FLJ44920 fis, clone BRAMY3011501, highly similar to Heterogeneous nuclear ribonucleoprotein U OS=Homo sapiens PE=2 SV=1             |           | 83 kDa  | 0.0074 | 0.1 | Fibro-BKO low, Fibro-Naive high | 15     | 14 | 1  | 2  |
| cDNA FLJ61290, highly similar to Neutral alpha-glucosidase AB OS=Homo sapiens PE=2 SV=1                                                  |           | 113 kDa | 0.74   | 0.9 | 0                               | 42     | 23 | 27 | 25 |
| Rab GDP dissociation inhibitor OS=Homo sapiens PE=2 SV=1                                                                                 |           | 51 kDa  | 0.019  | 0.6 | Fibro-BKO low, Fibro-Naive high | 24     | 23 | 12 | 12 |
| Adenylylhomocysteinase OS=Homo sapiens GN=AHCY PE=2 SV=1                                                                                 | AHCY      | 34 kDa  | 0.39   | 0.7 | 0                               | 14     | 9  | 7  | 8  |
| DHX9 protein (Fragment) OS=Homo sapiens GN=DHX9 PE=2 SV=1                                                                                | DHX9      | 67 kDa  | 0.043  | 0.2 | Fibro-BKO low, Fibro-Naive high | 17     | 13 | 3  | 3  |
| sp K1C9_HUMAN                                                                                                                            |           | 62 kDa  | 0.93   | 1.1 | 0                               | 10     | 5  | 2  | 13 |
| X-ray repair complementing defective repair in Chinese hamster cells 6 (Ku autoantigen, 70kDa), isoform CRA_a OS=Homo sapiens GN=XRCC6   | XRCC6     | 70 kDa  | 0.022  | 0.1 | Fibro-BKO low, Fibro-Naive high | 17     | 14 | 1  | 2  |
| Guanine nucleotide binding protein (G protein), beta polypeptide 1, isoform CRA_a OS=Homo sapiens GN=GNB1 PE=2 SV=1                      | GNB1      | 37 kDa  | 0.037  | 1.2 | Fibro-BKO high, Fibro-Naive low | 12     | 12 | 12 | 13 |
| cDNA FLJ75881, highly similar to Homo sapiens transferrin receptor (p90, CD71) (TFRC), mRNA OS=Homo sapiens PE=2 SV=1                    |           | 85 kDa  | 0.26   | 0.8 | 0                               | 11     | 10 | 8  | 6  |

|                                                                                                                            |             |         |         |      |                                 |    |    |    |    |
|----------------------------------------------------------------------------------------------------------------------------|-------------|---------|---------|------|---------------------------------|----|----|----|----|
| Protein phosphatase 2 (Formerly 2A), regulatory subunit A (PR 65), alpha isoform OS=Homo sapiens GN=PPP2R1A PE=1           | PPP2R1A     | 65 kDa  | 0.059   | 0.5  | 0                               | 11 | 10 | 4  | 6  |
| Arrestin domain-containing protein 1 (Fragment) OS=Homo sapiens GN=ARRDC1 PE=1 SV=1                                        | ARRDC1      | 29 kDa  | 0.26    | 1.2  | 0                               | 9  | 12 | 11 | 11 |
| Complement C4-B OS=Homo sapiens GN=C4B_2 PE=1 SV=1                                                                         | C4B_2       | 188 kDa | 0.076   | 4.3  | 0                               | 3  | 4  | 10 | 15 |
| Copine-1 OS=Homo sapiens GN=CPNE1 PE=1 SV=1                                                                                | CPNE1       | 53 kDa  | 0.012   | 0.4  | Fibro-BKO low, Fibro-Naive high | 13 | 13 | 5  | 4  |
| T-complex protein 1 subunit alpha OS=Homo sapiens GN=TCP1 PE=1 SV=1                                                        | TCP1        | 47 kDa  | 0.19    | 0.6  | 0                               | 17 | 13 | 7  | 10 |
| 40S ribosomal protein SA OS=Homo sapiens GN=RPSA PE=3 SV=1                                                                 | RPSA        | 33 kDa  | 0.073   | 0.3  | 0                               | 16 | 12 | 2  | 5  |
| HCG1998851, isoform CRA_c OS=Homo sapiens GN=hCG_1998851 PE=4 SV=1                                                         | hCG_1998851 | 47 kDa  | 0.45    | 0.9  | 0                               | 7  | 7  | 6  | 5  |
| EPH receptor A2, isoform CRA_a OS=Homo sapiens GN=EPHA2 PE=3 SV=1                                                          | EPHA2       | 108 kDa | 0.026   | 2.6  | Fibro-BKO high, Fibro-Naive low | 5  | 4  | 11 | 10 |
| Cadherin-1 OS=Homo sapiens GN=CDH1 PE=1 SV=1                                                                               | CDH1        | 100 kDa | 0.77    | 0.9  | 0                               | 10 | 8  | 6  | 9  |
| AP complex subunit beta OS=Homo sapiens GN=AP2B1 PE=2 SV=1                                                                 | AP2B1       | 106 kDa | 0.12    | 0.7  | 0                               | 19 | 17 | 11 | 13 |
| Proteasome subunit beta type OS=Homo sapiens PE=2 SV=1                                                                     |             | 26 kDa  | 0.0033  | 1.8  | Fibro-BKO high, Fibro-Naive low | 6  | 7  | 10 | 11 |
| Integrin beta-1 (Fragment) OS=Homo sapiens GN=ITGB1 PE=1 SV=1                                                              | ITGB1       | 11 kDa  | 0.3     | 1.6  | 0                               | 5  | 9  | 11 | 8  |
| Ribosomal protein L15 OS=Homo sapiens GN=RPL15 PE=3 SV=1                                                                   | RPL15       | 24 kDa  | 0.23    | 0.4  | 0                               | 12 | 6  | 3  | 3  |
| H3L-like histone (Fragment) OS=Homo sapiens PE=1 SV=1                                                                      |             | 12 kDa  | 0.099   | 0    | 0                               | 18 | 9  | 0  | 0  |
| Phosphoribosylaminoimidazole carboxylase, phosphoribosylaminoimidazole succinocarboxamide synthetase, isoform C            | PAICS       | 47 kDa  | 0.093   | 0.5  | 0                               | 11 | 10 | 6  | 4  |
| Tetraspanin (Fragment) OS=Homo sapiens GN=TSPAN14 PE=1 SV=2                                                                | TSPAN14     | 25 kDa  | 0.66    | 1.2  | 0                               | 10 | 5  | 8  | 8  |
| cDNA, FLJ96156, highly similar to Homo sapiens leucyl-tRNA synthetase (LARS), mRNA OS=Homo sapiens PE=2 SV=1               |             | 134 kDa | 0.52    | 0.8  | 0                               | 10 | 7  | 7  | 5  |
| Eukaryotic translation initiation factor 3 subunit A OS=Homo sapiens GN=elf3a PE=2 SV=1                                    | elf3a       | 166 kDa | 0.099   | 0.5  | 0                               | 11 | 9  | 5  | 3  |
| cDNA, FLJ94599, highly similar to Homo sapiens GDP-mannose 4,6-dehydratase (GMDS), mRNA OS=Homo sapiens PE=2 SV=1          |             | 42 kDa  | 0.041   | 0.2  | Fibro-BKO low, Fibro-Naive high | 14 | 11 | 3  | 2  |
| Heat shock 105kDa/110kDa protein 1, isoform CRA_a OS=Homo sapiens GN=HSPH1 PE=3 SV=1                                       | HSPH1       | 92 kDa  | 0.024   | 0.4  | Fibro-BKO low, Fibro-Naive high | 11 | 11 | 3  | 5  |
| Serpin peptidase inhibitor, clade E (Nexin, plasminogen activator inhibitor type 1), member 2, isoform CRA_b OS=Homo       | SERPINE2    | 44 kDa  | 0.0028  | 12   | Fibro-BKO high, Fibro-Naive low | 2  | 1  | 16 | 16 |
| Solute carrier family 44, member 2, isoform CRA_a OS=Homo sapiens GN=SLC44A2 PE=3 SV=1                                     | SLC44A2     | 80 kDa  | 0.14    | 0.9  | 0                               | 6  | 7  | 5  | 5  |
| Milk fat globule-EGF factor 8 protein, isoform CRA_a OS=Homo sapiens GN=MFG8 PE=4 SV=1                                     | MFG8        | 43 kDa  | 0.00013 | 6.5  | Fibro-BKO high, Fibro-Naive low | 12 | 13 | 67 | 74 |
| Immunoglobulin superfamily member 8 (Fragment) OS=Homo sapiens GN=IGSF8 PE=1 SV=1                                          | IGSF8       | 32 kDa  | 0.011   | 1.8  | Fibro-BKO high, Fibro-Naive low | 5  | 6  | 9  | 9  |
| DIP2B protein (Fragment) OS=Homo sapiens GN=DIP2B PE=2 SV=2                                                                | DIP2B       | 102 kDa | 0.036   | 4.8  | Fibro-BKO high, Fibro-Naive low | 1  | 5  | 13 | 12 |
| RuvB-like helicase OS=Homo sapiens GN=RUVBL2 PE=2 SV=1                                                                     | RUVBL2      | 47 kDa  | 0.22    | 0.5  | 0                               | 14 | 8  | 4  | 5  |
| cDNA FLJ54047, highly similar to Alpha-1 catenin (Cadherin-associated protein) OS=Homo sapiens PE=2 SV=1                   |             | 98 kDa  | 0.042   | 1.4  | Fibro-BKO high, Fibro-Naive low | 51 | 61 | 65 | 76 |
| Tubulointerstitial nephritis antigen-like OS=Homo sapiens GN=TINAGL1 PE=1 SV=1                                             | TINAGL1     | 41 kDa  | 0.75    | 1.2  | 0                               | 23 | 10 | 15 | 19 |
| Collagen, type I, alpha 1, isoform CRA_a OS=Homo sapiens GN=COL1A1 PE=4 SV=1                                               | COL1A1      | 85 kDa  | 0.0029  | INF  | Fibro-BKO high, Fibro-Naive low | 0  | 0  | 25 | 30 |
| Collagen alpha-1(I) chain preproprotein OS=Homo sapiens GN=COL1A1 PE=2 SV=1                                                | COL1A1      | 100 kDa | 0.021   | INF  | Fibro-BKO high, Fibro-Naive low | 0  | 0  | 22 | 32 |
| Sodium/potassium-transporting ATPase subunit beta OS=Homo sapiens GN=ATP1B1 PE=2 SV=1                                      | ATP1B1      | 35 kDa  | 0.044   | 0.6  | Fibro-BKO low, Fibro-Naive high | 7  | 9  | 4  | 4  |
| cDNA FLJ78449 OS=Homo sapiens PE=2 SV=1                                                                                    |             | 40 kDa  | 0.3     | 1.3  | 0                               | 7  | 7  | 9  | 7  |
| H/ACA ribonucleoprotein complex subunit 4 (Fragment) OS=Homo sapiens GN=DKC1 PE=1 SV=8                                     | DKC1        | 30 kDa  | 0.14    | 0.1  | 0                               | 16 | 8  | 1  | 2  |
| Splicing factor 3B subunit 1 (Fragment) OS=Homo sapiens GN=SF3B1 PE=1 SV=1                                                 | SF3B1       | 27 kDa  | 0.018   | 0.3  | Fibro-BKO low, Fibro-Naive high | 11 | 13 | 2  | 4  |
| Staphylococcal nuclease domain containing 1, isoform CRA_b OS=Homo sapiens GN=SND1 PE=2 SV=1                               | SND1        | 102 kDa | 0.12    | 0.3  | 0                               | 8  | 13 | 1  | 3  |
| Low density lipoprotein-related protein 1 variant (Fragment) OS=Homo sapiens PE=2 SV=1                                     |             | 262 kDa | 0.015   | 30   | Fibro-BKO high, Fibro-Naive low | 0  | 1  | 14 | 12 |
| Proteasome subunit beta type OS=Homo sapiens PE=2 SV=1                                                                     |             | 23 kDa  | 0.64    | 1.2  | 0                               | 8  | 4  | 7  | 6  |
| cDNA FLJ50510, highly similar to Heat shock 70 kDa protein 4 OS=Homo sapiens PE=2 SV=1                                     |             | 94 kDa  | 0.28    | 0.7  | 0                               | 7  | 12 | 5  | 6  |
| Epididymis secretory protein Li 69 OS=Homo sapiens GN=HEL-S-69 PE=1 SV=1                                                   | HEL-S-69    | 60 kDa  | 0.0022  | 0.5  | Fibro-BKO low, Fibro-Naive high | 34 | 34 | 16 | 17 |
| Proteasome (Prosome, macropain) 26S subunit, non-ATPase, 6, isoform CRA_c OS=Homo sapiens GN=PSMD6 PE=2 SV=1               | PSMD6       | 40 kDa  | 0.047   | 0.4  | Fibro-BKO low, Fibro-Naive high | 10 | 12 | 5  | 3  |
| Unconventional myosin-IId OS=Homo sapiens GN=MYO1D PE=1 SV=1                                                               | MYO1D       | 111 kDa | 0.044   | 2.5  | Fibro-BKO high, Fibro-Naive low | 2  | 4  | 6  | 7  |
| Ribosomal protein S2 OS=Homo sapiens GN=RPS2 PE=2 SV=1                                                                     | RPS2        | 31 kDa  | 0.14    | 0.5  | 0                               | 10 | 7  | 4  | 3  |
| cDNA FLJ61587, highly similar to Integrin alpha-1 (Fragment) OS=Homo sapiens PE=2 SV=1                                     |             | 130 kDa | 0.16    | 4.7  | 0                               | 1  | 4  | 13 | 7  |
| Casein kinase II subunit alpha OS=Homo sapiens GN=CSNK2A1 PE=1 SV=1                                                        | CSNK2A1     | 45 kDa  | 0.05    | 0.05 | Fibro-BKO low, Fibro-Naive high | 13 | 9  | 0  | 1  |
| COL6A2 protein OS=Homo sapiens PE=2 SV=1                                                                                   |             | 47 kDa  | 0.0025  | 33   | Fibro-BKO high, Fibro-Naive low | 0  | 1  | 14 | 14 |
| N-ethylmaleimide-sensitive factor attachment protein, alpha, isoform CRA_c OS=Homo sapiens GN=NAPA PE=4 SV=1               | NAPA        | 33 kDa  | 0.26    | 0.5  | 0                               | 12 | 7  | 5  | 4  |
| RAB2, member RAS oncogene family, isoform CRA_a OS=Homo sapiens GN=RAB2 PE=4 SV=1                                          | RAB2        | 24 kDa  | 0.25    | 0.6  | 0                               | 7  | 12 | 4  | 6  |
| Epididymis secretory sperm binding protein Li 128m OS=Homo sapiens GN=HEL-S-128m PE=2 SV=1                                 | HEL-S-128m  | 25 kDa  | 0.24    | 1.4  | 0                               | 7  | 5  | 8  | 7  |
| Solute carrier family 16 (Monocarboxylic acid transporters), member 1, isoform CRA_b OS=Homo sapiens GN=SLC16A1            | SLC16A1     | 54 kDa  | 0.34    | 1.8  | 0                               | 2  | 9  | 8  | 9  |
| cDNA FLJ75066, highly similar to Homo sapiens complement component 1, r subcomponent (C1r), mRNA OS=Homo sapiens PE=2 SV=1 |             | 80 kDa  | 0.16    | INF  | 0                               | 0  | 0  | 7  | 19 |
| Unconventional myosin-VI OS=Homo sapiens GN=MYO6 PE=1 SV=1                                                                 | MYO6        | 145 kDa | 0.082   | 0.4  | 0                               | 7  | 11 | 3  | 3  |
| Band 4.1-like protein 1 OS=Homo sapiens GN=EPB41L1 PE=1 SV=1                                                               | EPB41L1     | 98 kDa  | 0.13    | 0.7  | 0                               | 9  | 9  | 5  | 7  |
| Putative uncharacterized protein Nbla00445 (Fragment) OS=Homo sapiens GN=Nbla00445 PE=2 SV=1                               | Nbla00445   | 103 kDa | 0.2     | 1.5  | 0                               | 9  | 12 | 15 | 12 |
| ADP-ribosylation factor 1, isoform CRA_a OS=Homo sapiens GN=ARF1 PE=3 SV=1                                                 | ARF1        | 21 kDa  | 0.12    | 0.6  | 0                               | 13 | 11 | 7  | 5  |
| EPH receptor B4, isoform CRA_a OS=Homo sapiens GN=EPHB4 PE=3 SV=1                                                          | EPHB4       | 108 kDa | 0.46    | 1.3  | 0                               | 5  | 11 | 8  | 11 |
| Epididymis secretory sperm binding protein Li 66p OS=Homo sapiens GN=HEL-S-66p PE=2 SV=1                                   | HEL-S-66p   | 33 kDa  | 0.026   | 0.4  | Fibro-BKO low, Fibro-Naive high | 9  | 10 | 2  | 4  |
| von Willebrand factor A domain containing 1, isoform CRA_c OS=Homo sapiens GN=VWA1 PE=4 SV=1                               | VWA1        | 43 kDa  | 0.58    | 1.2  | 0                               | 7  | 5  | 5  | 8  |
| Heterogeneous nuclear ribonucleoprotein K, isoform CRA_d OS=Homo sapiens GN=HNRPK PE=4 SV=1                                | HNRPK       | 51 kDa  | 0.18    | 0.6  | 0                               | 6  | 8  | 3  | 5  |
| RAN binding protein 5, isoform CRA_d OS=Homo sapiens GN=RANBP5 PE=4 SV=1                                                   | RANBP5      | 124 kDa | 0.12    | 0.5  | 0                               | 7  | 11 | 4  | 4  |

|                                                                                                                                                                   |                |         |        |     |   |    |    |    |    |
|-------------------------------------------------------------------------------------------------------------------------------------------------------------------|----------------|---------|--------|-----|---|----|----|----|----|
| Basal cell adhesion molecule (Lutheran blood group) OS=Homo sapiens GN=BCAM PE=4 SV=1                                                                             | BCAM           | 67 kDa  | 0.078  | 2.1 | 0 | 5  | 4  | 7  | 10 |
| cDNA FLJ77590, highly similar to Homo sapiens leucine rich repeat containing 1, mRNA OS=Homo sapiens PE=2 SV=1                                                    |                | 59 kDa  | 0.2    | 1.5 | 0 | 5  | 9  | 10 | 9  |
| cDNA FLJ30049 fis, clone ADRGL1000033, highly similar to 26S proteasome non-ATPase regulatory subunit 3 OS=Homo sapiens PE=2 SV=1                                 |                | 57 kDa  | 0.087  | 0.8 | 0 | 7  | 8  | 5  | 6  |
| Acyl-CoA synthetase 4 OS=Homo sapiens GN=FACL4 PE=2 SV=1                                                                                                          | FACL4          | 74 kDa  | 0.29   | 1.8 | 0 | 6  | 4  | 10 | 6  |
| Epididymis secretory sperm binding protein Li 89n OS=Homo sapiens GN=HEL-S-89n PE=2 SV=1                                                                          | HEL-S-89n      | 72 kDa  | 0.75   | 1   | 0 | 11 | 10 | 8  | 10 |
| cDNA FLJ14168 fis, clone NTR2R2001440, highly similar to 14-3-3 protein gamma OS=Homo sapiens PE=2 SV=1                                                           |                | 28 kDa  | 0.57   | 0.9 | 0 | 6  | 8  | 6  | 5  |
| S100A10 protein (Fragment) OS=Homo sapiens GN=S100A10 PE=2 SV=1                                                                                                   | S100A10        | 11 kDa  | 0.0024 | 0.5 |   | 9  | 10 | 4  | 4  |
| Integrin beta OS=Homo sapiens GN=ITGB5 PE=2 SV=1                                                                                                                  | ITGB5          | 88 kDa  | 0.015  | 4.9 |   | 1  | 3  | 8  | 9  |
| Apolipoprotein A-I, isoform CRA_a OS=Homo sapiens GN=APOA1 PE=3 SV=1                                                                                              | APOA1          | 31 kDa  | 0.39   | 2.4 | 0 | 4  | 2  | 3  | 10 |
| cDNA FLJ51525, highly similar to Homo sapiens aldehyde dehydrogenase 16 family, member A1 (ALDH16A1), mRNA OS=Homo sapiens PE=2 SV=1                              |                | 67 kDa  | 0.028  | 0.2 |   | 9  | 10 | 3  | 1  |
| Testicular tissue protein Li 164 OS=Homo sapiens PE=2 SV=1                                                                                                        |                | 50 kDa  | 0.0082 | 0.6 |   | 8  | 8  | 4  | 4  |
| cDNA, FLJ96428, highly similar to Homo sapiens proteasome (prosome, macropain) 26S subunit, non-ATPase, 7 (Mov34 homolog) (PSMD7), mRNA OS=Homo sapiens PE=2 SV=1 |                | 37 kDa  | 0.26   | 0.4 | 0 | 12 | 6  | 3  | 4  |
| Phospholipid scramblase OS=Homo sapiens GN=PLSCR1 PE=1 SV=1                                                                                                       | PLSCR1         | 34 kDa  | 0.35   | 0.6 | 0 | 5  | 10 | 3  | 5  |
| Kinesin-like protein (Fragment) OS=Homo sapiens PE=2 SV=1                                                                                                         |                | 101 kDa | 0.76   | 1.1 | 0 | 4  | 7  | 7  | 4  |
| Proteasome (Prosome, macropain) 26S subunit, ATPase, 4, isoform CRA_b OS=Homo sapiens GN=PSMC4 PE=2 SV=1                                                          | PSMC4          | 47 kDa  | 0.85   | 1.1 | 0 | 5  | 4  | 7  | 2  |
| 26S protease regulatory subunit 10B OS=Homo sapiens GN=PSMC6 PE=1 SV=1                                                                                            | PSMC6          | 46 kDa  | 0.79   | 1.2 | 0 | 7  | 3  | 3  | 6  |
| Proteasome (Prosome, macropain) 26S subunit, non-ATPase, 13, isoform CRA_a OS=Homo sapiens GN=PSMD13 PE=4 SV=1                                                    | PSMD13         | 43 kDa  | 0.023  | 0.2 |   | 7  | 9  | 2  | 1  |
| Putative uncharacterized protein DKFZp686F17268 (Fragment) OS=Homo sapiens GN=DKFZp686F17268 PE=2 SV=1                                                            | DKFZp686F17268 | 50 kDa  | 0.09   | 0.3 | 0 | 8  | 9  | 4  | 1  |
| HCG2043275 OS=Homo sapiens GN=EEF1E1-BLOC1S5 PE=4 SV=2                                                                                                            | EEF1E1-BLOC1S5 | 17 kDa  | 0.9    | 0.9 | 0 | 6  | 3  | 4  | 3  |
| Myosin light polypeptide 6 OS=Homo sapiens GN=MYL6 PE=1 SV=1                                                                                                      | MYL6           | 16 kDa  | 0.11   | 0.4 | 0 | 8  | 7  | 1  | 4  |
| Proteasome (Prosome, macropain) 26S subunit, non-ATPase, 12, isoform CRA_a (Fragment) OS=Homo sapiens GN=PSMD12                                                   | PSMD12         | 53 kDa  | 0.11   | 0.7 | 0 | 7  | 6  | 4  | 4  |
| Vasodilator-stimulated phosphoprotein isoform 1 OS=Homo sapiens GN=VASP PE=2 SV=1                                                                                 | VASP           | 40 kDa  | 0.71   | 0.9 | 0 | 6  | 6  | 4  | 6  |
| Coatamer subunit beta (Fragment) OS=Homo sapiens GN=COPB1 PE=1 SV=8                                                                                               | COPB1          | 55 kDa  | 0.026  | 0.2 |   | 8  | 11 | 2  | 2  |
| cDNA FLJ56822, highly similar to Alpha-2-HS-glycoprotein OS=Homo sapiens PE=2 SV=1                                                                                |                | 27 kDa  | 0.18   | 1.1 | 0 | 6  | 7  | 6  | 7  |
| sp PRDX1_HUMAN                                                                                                                                                    |                | 22 kDa  | 1      | 1   | 0 | 5  | 5  | 3  | 6  |
| GCN1 general control of amino-acid synthesis 1-like 1 (Yeast), isoform CRA_b OS=Homo sapiens GN=GCN1L1 PE=4 SV=1                                                  | GCN1L1         | 267 kDa | 0.18   | 3.1 | 0 | 0  | 7  | 8  | 11 |
| Hypoxia up-regulated protein 1 OS=Homo sapiens GN=HYOU1 PE=1 SV=1                                                                                                 | HYOU1          | 105 kDa | 0.051  | 2.3 | 0 | 3  | 5  | 7  | 9  |
| Proteasome subunit alpha type OS=Homo sapiens PE=2 SV=1                                                                                                           |                | 27 kDa  | 0.65   | 0.8 | 0 | 7  | 5  | 3  | 6  |
| cDNA FLJ57283, highly similar to Actin, cytoplasmic 2 OS=Homo sapiens PE=2 SV=1                                                                                   |                | 40 kDa  | 0.24   | 1.2 | 0 | 48 | 42 | 44 | 50 |
| Ribosomal protein L18, isoform CRA_c OS=Homo sapiens GN=RPL18 PE=4 SV=1                                                                                           | RPL18          | 22 kDa  | 0.4    | 0.6 | 0 | 9  | 5  | 3  | 5  |
| Family with sequence similarity 62 (C2 domain containing), member A, isoform CRA_a OS=Homo sapiens GN=FAM62A PE=4 SV=1                                            | FAM62A         | 124 kDa | 0.0042 | 0.4 |   | 8  | 8  | 3  | 3  |
| Reticulon OS=Homo sapiens GN=RTN3 PE=4 SV=1                                                                                                                       | RTN3           | 26 kDa  | 0.0096 | 0.5 |   | 6  | 7  | 3  | 3  |
| cDNA FLJ75085, highly similar to Homo sapiens glutaminyl-tRNA synthetase (QARS), mRNA OS=Homo sapiens PE=2 SV=1                                                   |                | 88 kDa  | 0.053  | 0.3 | 0 | 6  | 9  | 2  | 2  |
| Inactive tyrosine-protein kinase transmembrane receptor ROR1 OS=Homo sapiens GN=ROR1 PE=1 SV=1                                                                    | ROR1           | 98 kDa  | 0.17   | 3.2 | 0 | 0  | 5  | 6  | 8  |
| Coatamer protein complex, subunit epsilon, isoform CRA_g OS=Homo sapiens GN=COPE PE=1 SV=1                                                                        | COPE           | 37 kDa  | 0.057  | 0   | 0 | 14 | 9  | 0  | 0  |
| High mobility group AT-hook 1, isoform CRA_b OS=Homo sapiens GN=HMG1A PE=4 SV=1                                                                                   | HMG1A          | 34 kDa  | 0.0011 | 0   |   | 12 | 12 | 0  | 0  |
| RAB11A, member RAS oncogene family, isoform CRA_a OS=Homo sapiens GN=RAB11A PE=4 SV=1                                                                             | RAB11A         | 24 kDa  | 0.52   | 0.8 | 0 | 7  | 5  | 4  | 5  |
| Prominin 2, isoform CRA_a OS=Homo sapiens GN=PROM2 PE=4 SV=1                                                                                                      | PROM2          | 92 kDa  | 0.81   | 1.1 | 0 | 5  | 6  | 8  | 3  |
| cDNA, FLJ92896, highly similar to Homo sapiens proteasome (prosome, macropain) 26S subunit, non-ATPase, 1 (PSMD1), mRNA OS=Homo sapiens PE=2 SV=1                 |                | 106 kDa | 0.1    | 1.3 | 0 | 4  | 5  | 5  | 5  |
| Putative uncharacterized protein RAB10 (Fragment) OS=Homo sapiens GN=RAB10 PE=4 SV=1                                                                              | RAB10          | 18 kDa  | 0.1    | 0.7 | 0 | 8  | 7  | 4  | 5  |
| Aconitate hydratase OS=Homo sapiens GN=HEL60 PE=2 SV=1                                                                                                            | HEL60          | 98 kDa  | 0.11   | 1.6 | 0 | 4  | 4  | 6  | 5  |
| Actin related protein 2/3 complex, subunit 1B, 41kDa OS=Homo sapiens GN=ARPC1B PE=2 SV=1                                                                          | ARPC1B         | 41 kDa  | 0.24   | 0.5 | 0 | 9  | 5  | 3  | 3  |
| Epoxide hydrolase OS=Homo sapiens GN=EPHX1 PE=2 SV=1                                                                                                              | EPHX1          | 53 kDa  | 0.025  | 0.3 |   | 6  | 8  | 2  | 2  |
| Actinin, alpha 1, isoform CRA_a OS=Homo sapiens GN=ACTN1 PE=4 SV=1                                                                                                | ACTN1          | 103 kDa | 0.61   | 0.9 | 0 | 20 | 29 | 15 | 23 |
| Actin related protein 2/3 complex, subunit 2, 34kDa, isoform CRA_a OS=Homo sapiens GN=ARPC2 PE=2 SV=1                                                             | ARPC2          | 34 kDa  | 0.16   | 0.3 | 0 | 5  | 9  | 3  | 1  |
| Actin-like protein (Fragment) OS=Homo sapiens GN=ACT PE=4 SV=1                                                                                                    | ACT            | 11 kDa  | 0.69   | 0.9 | 0 | 15 | 12 | 9  | 13 |
| Zinc finger, UBR1 type 1, isoform CRA_c OS=Homo sapiens GN=ZUBR1 PE=4 SV=1                                                                                        | ZUBR1          | 290 kDa | 0.09   | 4.7 | 0 | 0  | 5  | 11 | 9  |
| Collagen, type XVIII, alpha 1, isoform CRA_d OS=Homo sapiens GN=COL18A1 PE=4 SV=1                                                                                 | COL18A1        | 136 kDa | 0.29   | 3.1 | 0 | 0  | 4  | 5  | 11 |
| Alanyl (Membrane) aminopeptidase (Aminopeptidase N, aminopeptidase M, microsomal aminopeptidase, CD13, p150), mRNA OS=Homo sapiens PE=2 SV=1                      | ANPEP          | 110 kDa | 0.017  | INF |   | 0  | 0  | 20 | 28 |
| cDNA FLJ56405, highly similar to Epidermal growth factor receptor kinase substrate 8 OS=Homo sapiens PE=2 SV=1                                                    |                | 77 kDa  | 0.89   | 0.9 | 0 | 3  | 8  | 4  | 5  |
| CD59 glycoprotein OS=Homo sapiens GN=CD59 PE=1 SV=1                                                                                                               | CD59           | 12 kDa  | 0.34   | 0.7 | 0 | 7  | 5  | 4  | 4  |
| Proteasome 26S ATPase subunit 1 variant (Fragment) OS=Homo sapiens PE=1 SV=1                                                                                      |                | 49 kDa  | 0.34   | 0.9 | 0 | 6  | 6  | 5  | 5  |
| Vacuolar protein sorting 28 (Yeast), isoform CRA_a OS=Homo sapiens GN=VPS28 PE=2 SV=1                                                                             | VPS28          | 25 kDa  | 0.037  | 2.1 |   | 4  | 4  | 8  | 7  |
| cDNA FLJ56016, highly similar to C-1-tetrahydrofolate synthase, cytoplasmic OS=Homo sapiens PE=2 SV=1                                                             |                | 110 kDa | 0.19   | 0.7 | 0 | 5  | 6  | 4  | 3  |
| Protein disulfide-isomerase OS=Homo sapiens PE=2 SV=1                                                                                                             |                | 54 kDa  | 0.061  | 0.3 | 0 | 9  | 7  | 2  | 3  |
| Testicular tissue protein Li 149 OS=Homo sapiens PE=2 SV=1                                                                                                        |                | 46 kDa  | 0.64   | 0.7 | 0 | 8  | 3  | 2  | 5  |
| Pre-mRNA-processing-splicing factor 8 (Fragment) OS=Homo sapiens GN=PRPF8 PE=1 SV=8                                                                               | PRPF8          | 120 kDa | 0.2    | 0.5 | 0 | 4  | 7  | 2  | 3  |
| cDNA FLJ76962, highly similar to Homo sapiens nucleolar protein 5A (56kDa with KKE/D repeat) (NOL5A), mRNA OS=Homo sapiens PE=2 SV=1                              |                | 66 kDa  | 0.0013 | 0.3 |   | 8  | 9  | 2  | 2  |
| Nucleoside diphosphate kinase OS=Homo sapiens GN=NME1-NME2 PE=1 SV=1                                                                                              | NME1-NME2      | 33 kDa  | 0.081  | 0.5 | 0 | 6  | 5  | 2  | 3  |

|                                                                                                                                               |            |         |           |      |   |    |    |     |     |
|-----------------------------------------------------------------------------------------------------------------------------------------------|------------|---------|-----------|------|---|----|----|-----|-----|
| Transforming growth factor beta-induced 68kDa isoform 1 (Fragment) OS=Homo sapiens GN=TGFB1 PE=2 SV=1                                         | TGFB1      | 75 kDa  | 0.19      | 2.5  | 0 | 2  | 3  | 7   | 4   |
| cDNA FLJ35376 fis, clone SKMUS2004044, highly similar to Homo sapiens ribosomal protein L3 (RPL3), transcript variant 2, mRNA OS=Homo sapiens |            | 40 kDa  | 0.38      | 0.5  | 0 | 9  | 4  | 2   | 4   |
| cDNA FLJ11291 fis, clone PLACE1009659, highly similar to Nck-associated protein 1 OS=Homo sapiens PE=2 SV=1                                   |            | 60 kDa  | 0.072     | 4    | 0 | 1  | 3  | 8   | 6   |
| Histone H2A OS=Homo sapiens GN=H2AFJ PE=3 SV=1                                                                                                | H2AFJ      | 14 kDa  | 0.073     | 0.2  | 0 | 52 | 33 | 6   | 6   |
| sp K22E_HUMAN                                                                                                                                 |            | 65 kDa  | 0.73      | 0.7  | 0 | 9  | 7  | 1   | 10  |
| Prelamin-A/C OS=Homo sapiens GN=LMNA PE=1 SV=1                                                                                                | LMNA       | 56 kDa  | 0.061     | 0.1  | 0 | 11 | 8  | 2   | 0   |
| EH-domain containing 2, isoform CRA_a OS=Homo sapiens GN=EHD2 PE=3 SV=1                                                                       | EHD2       | 61 kDa  | 0.036     | 11   |   | 0  | 2  | 10  | 8   |
| Stomatin, isoform CRA_a OS=Homo sapiens GN=STOM PE=4 SV=1                                                                                     | STOM       | 32 kDa  | 0.014     | 23   |   | 1  | 0  | 9   | 12  |
| Proteasome activator complex subunit 2 OS=Homo sapiens GN=PSME2 PE=1 SV=1                                                                     | PSME2      | 29 kDa  | 0.013     | 0.06 |   | 10 | 9  | 1   | 0   |
| Gamma filamin variant (Fragment) OS=Homo sapiens PE=2 SV=1                                                                                    |            | 143 kDa | 0.0015    | 27   |   | 1  | 0  | 12  | 13  |
| Syndecan binding protein (Syntenin), isoform CRA_c OS=Homo sapiens GN=SDCBP PE=4 SV=1                                                         | SDCBP      | 32 kDa  | 0.0062    | 1.3  |   | 86 | 90 | 100 | 103 |
| Histone H2B OS=Homo sapiens GN=HIST1H2BK PE=3 SV=1                                                                                            | HIST1H2BK  | 14 kDa  | 0.14      | 0.4  | 0 | 76 | 47 | 15  | 24  |
| Testicular tissue protein Li 153 OS=Homo sapiens PE=2 SV=1                                                                                    |            | 18 kDa  | 0.31      | 1.2  | 0 | 4  | 6  | 5   | 6   |
| Calpain 5, isoform CRA_c OS=Homo sapiens GN=CAPN5 PE=2 SV=1                                                                                   | CAPN5      | 73 kDa  | 0.84      | 0.9  | 0 | 3  | 7  | 3   | 5   |
| ARHG protein (Fragment) OS=Homo sapiens GN=ARHG PE=2 SV=1                                                                                     | ARHG       | 21 kDa  | 0.29      | 0.8  | 0 | 6  | 5  | 4   | 4   |
| Proteasome subunit alpha type OS=Homo sapiens PE=2 SV=1                                                                                       |            | 26 kDa  | 0.29      | 1.3  | 0 | 4  | 4  | 5   | 4   |
| cDNA FLJ55002, highly similar to Alpha-centractin OS=Homo sapiens PE=2 SV=1                                                                   |            | 38 kDa  | 0.096     | 0.3  | 0 | 10 | 7  | 3   | 2   |
| Proteasome subunit alpha type (Fragment) OS=Homo sapiens GN=PSMA4 PE=1 SV=1                                                                   | PSMA4      | 26 kDa  | 0.04      | 1.9  |   | 4  | 3  | 6   | 6   |
| Isocitrate dehydrogenase [NADP] OS=Homo sapiens PE=2 SV=1                                                                                     |            | 47 kDa  | 0.046     | 0.4  |   | 8  | 8  | 2   | 4   |
| Phosphoglycerate mutase (Fragment) OS=Homo sapiens PE=2 SV=1                                                                                  |            | 29 kDa  | 0.047     | 0.2  |   | 9  | 7  | 2   | 1   |
| Pre-mRNA-processing factor 19 (Fragment) OS=Homo sapiens GN=PRPF19 PE=1 SV=1                                                                  | PRPF19     | 28 kDa  | 0.016     | 0.3  |   | 9  | 6  | 2   | 2   |
| 60S ribosomal protein L7a OS=Homo sapiens GN=RPL7A PE=1 SV=1                                                                                  | RPL7A      | 17 kDa  | 0.14      | 0.3  | 0 | 12 | 7  | 2   | 3   |
| CAD protein OS=Homo sapiens GN=CAD PE=1 SV=1                                                                                                  | CAD        | 236 kDa | 0.025     | 5    |   | 1  | 2  | 7   | 6   |
| Ubiquitinyl hydrolase 1 OS=Homo sapiens PE=2 SV=1                                                                                             |            | 96 kDa  | 0.24      | 0.5  | 0 | 7  | 8  | 5   | 1   |
| Small nuclear ribonucleoprotein Sm D1 OS=Homo sapiens GN=SNRPD1 PE=1 SV=1                                                                     | SNRPD1     | 8 kDa   | 0.044     | 0.3  |   | 8  | 8  | 3   | 1   |
| Sorcিন OS=Homo sapiens GN=SRI PE=1 SV=1                                                                                                       | SRI        | 18 kDa  | 0.017     | 0.2  |   | 7  | 6  | 1   | 1   |
| Villin 1 variant (Fragment) OS=Homo sapiens PE=2 SV=1                                                                                         |            | 93 kDa  | 0.039     | 0.3  |   | 7  | 8  | 1   | 3   |
| DNA-directed RNA polymerase subunit OS=Homo sapiens GN=POLR2A PE=1 SV=1                                                                       | POLR2A     | 218 kDa | 0.027     | 0.06 |   | 7  | 10 | 0   | 1   |
| Epididymis secretory sperm binding protein Li 129m OS=Homo sapiens GN=HEL-S-129m PE=2 SV=1                                                    | HEL-S-129m | 29 kDa  | 0.011     | 0.06 |   | 8  | 10 | 0   | 1   |
| Eukaryotic translation initiation factor 3 subunit L OS=Homo sapiens GN=EIF3L PE=1 SV=1                                                       | EIF3L      | 71 kDa  | 0.036     | 0.6  |   | 6  | 7  | 3   | 4   |
| cDNA FLJ61359, highly similar to Adapter-related protein complex 2 alpha-2 subunit OS=Homo sapiens PE=2 SV=1                                  |            | 103 kDa | 0.23      | 0.6  | 0 | 7  | 11 | 4   | 6   |
| CEACAM1 protein (Fragment) OS=Homo sapiens GN=CEACAM1 PE=2 SV=1                                                                               | CEACAM1    | 53 kDa  | 0.99      | 1    | 0 | 4  | 5  | 3   | 5   |
| Testis secretory sperm-binding protein Li 197a OS=Homo sapiens PE=2 SV=1                                                                      |            | 49 kDa  | 0.64      | 1.1  | 0 | 4  | 3  | 3   | 4   |
| cDNA FLJ31086 fis, clone IMR321000044, highly similar to Tyrosine-protein kinase-like 7 OS=Homo sapiens PE=2 SV=1                             |            | 46 kDa  | 0.62      | 1.1  | 0 | 5  | 4  | 5   | 4   |
| Tyrosine-protein kinase OS=Homo sapiens PE=2 SV=1                                                                                             |            | 61 kDa  | 0.49      | 1.4  | 0 | 3  | 6  | 4   | 7   |
| IQ motif containing GTPase activating protein 2, isoform CRA_b OS=Homo sapiens GN=IQGAP2 PE=4 SV=1                                            | IQGAP2     | 181 kDa | 0.021     | 0.4  |   | 6  | 7  | 2   | 3   |
| Proteasome subunit alpha type OS=Homo sapiens PE=2 SV=1                                                                                       |            | 28 kDa  | 1         | 1    | 0 | 3  | 5  | 4   | 3   |
| Histone H2B OS=Homo sapiens GN=ABCF2 PE=3 SV=1                                                                                                | ABCF2      | 7 kDa   | 0.12      | 0.5  | 0 | 7  | 6  | 2   | 4   |
| cDNA FLJ77464, highly similar to Homo sapiens protocadherin 1 (cadherin-like 1) (PCDH1), transcript variant 1, mRNA OS=Homo sapiens PE=2 SV=1 |            | 115 kDa | 0.042     | 2.9  |   | 3  | 2  | 7   | 6   |
| Claudin OS=Homo sapiens GN=CLDN3 PE=2 SV=1                                                                                                    | CLDN3      | 23 kDa  | 0.088     | 0.5  | 0 | 12 | 11 | 4   | 7   |
| cDNA FLJ57825, highly similar to DNA-dependent protein kinase catalytic subunit (EC 2.7.11.1) OS=Homo sapiens PE=2 SV=1                       |            | 128 kDa | 0.45      | 0.5  | 0 | 2  | 7  | 2   | 2   |
| Tubulin tyrosine ligase-like family, member 12, isoform CRA_a OS=Homo sapiens GN=TTLL12 PE=4 SV=1                                             | TTLL12     | 74 kDa  | 0.014     | 0.1  |   | 8  | 7  | 1   | 1   |
| Epididymis secretory protein Li 55 OS=Homo sapiens GN=HEL-S-55 PE=2 SV=1                                                                      | HEL-S-55   | 17 kDa  | 0.05      | 0.06 | 0 | 10 | 7  | 0   | 1   |
| NID2 protein OS=Homo sapiens GN=NID2 PE=2 SV=1                                                                                                | NID2       | 107 kDa | < 0.00010 | INF  |   | 0  | 0  | 22  | 24  |
| Epididymis secretory protein Li 102 OS=Homo sapiens GN=HEL-S-102 PE=2 SV=1                                                                    | HEL-S-102  | 23 kDa  | 0.52      | 1.1  | 0 | 3  | 4  | 3   | 4   |
| Receptor-type tyrosine-protein phosphatase F (Fragment) OS=Homo sapiens GN=PTPRF PE=1 SV=1                                                    | PTPRF      | 146 kDa | 0.6       | 1.1  | 0 | 3  | 5  | 4   | 4   |
| Epididymis secretory protein Li 34 OS=Homo sapiens GN=PEBP1 PE=2 SV=1                                                                         | PEBP1      | 21 kDa  | 0.39      | 0.7  | 0 | 5  | 6  | 5   | 2   |
| Tyrosine 3-monooxygenase/tryptophan 5-monooxygenase activation protein, eta polypeptide, isoform CRA_b OS=Homo sapiens                        | YWHAH      | 28 kDa  | 0.29      | 0.8  | 0 | 5  | 5  | 4   | 3   |
| ATP-binding cassette sub-family E member 1 OS=Homo sapiens GN=ABCE1 PE=1 SV=1                                                                 | ABCE1      | 47 kDa  | 0.37      | 0.6  | 0 | 3  | 6  | 2   | 3   |
| Carbonic anhydrase 12 OS=Homo sapiens GN=CA12 PE=1 SV=1                                                                                       | CA12       | 32 kDa  | 0.011     | 2.9  |   | 2  | 3  | 6   | 7   |
| Tubulin beta chain OS=Homo sapiens GN=TUBB PE=2 SV=1                                                                                          | TUBB       | 50 kDa  | 0.46      | 0.9  | 0 | 83 | 70 | 52  | 67  |
| Midkine OS=Homo sapiens GN=MDK PE=1 SV=1                                                                                                      | MDK        | 17 kDa  | 0.21      | 0.6  | 0 | 6  | 5  | 2   | 4   |
| cDNA FLJ50285, highly similar to Arginyl-tRNA synthetase (EC 6.1.1.19) OS=Homo sapiens PE=2 SV=1                                              |            | 52 kDa  | 0.062     | 0.2  | 0 | 8  | 6  | 2   | 1   |
| Armadillo repeat gene deletes in velocardiocalf syndrome OS=Homo sapiens GN=ARVCF PE=2 SV=1                                                   | ARVCF      | 105 kDa | 0.25      | 2.1  | 0 | 1  | 5  | 6   | 5   |
| RAB14, member RAS oncogene family, isoform CRA_a OS=Homo sapiens GN=RAB14 PE=4 SV=1                                                           | RAB14      | 24 kDa  | 0.27      | 0.5  | 0 | 7  | 9  | 1   | 6   |
| cDNA FLJ16785 fis, clone NT2R12015342, highly similar to Solute carrier family 2, facilitated glucose transporter member 1 OS=Homo sapiens    |            | 46 kDa  | 0.074     | 3.2  | 0 | 1  | 3  | 6   | 5   |
| cDNA FLJ52352, highly similar to Dnal homolog subfamily A member 1 OS=Homo sapiens PE=2 SV=1                                                  |            | 28 kDa  | 0.33      | 0.5  | 0 | 6  | 6  | 1   | 5   |
| Testicular secretory protein Li 9 OS=Homo sapiens PE=2 SV=1                                                                                   |            | 22 kDa  | 0.014     | 0.1  |   | 8  | 7  | 1   | 1   |
| HECT, UBA and WWE domain containing 1, isoform CRA_c OS=Homo sapiens GN=HUWE1 PE=4 SV=1                                                       | HUWE1      | 481 kDa | 0.062     | 0.2  | 0 | 8  | 6  | 2   | 1   |

|                                                                                                                                                 |                |         |        |     |                                 |    |    |    |    |
|-------------------------------------------------------------------------------------------------------------------------------------------------|----------------|---------|--------|-----|---------------------------------|----|----|----|----|
| HCG27198, isoform CRA_c OS=Homo sapiens GN=hCG_27198 PE=3 SV=1                                                                                  | hCG_27198      | 231 kDa | 0.16   | 0.3 | 0                               | 5  | 9  | 3  | 1  |
| Epididymis secretory protein Li 106 OS=Homo sapiens GN=HEL-S-106 PE=2 SV=1                                                                      | HEL-S-106      | 56 kDa  | 0.16   | 0.3 | 0                               | 7  | 5  | 0  | 3  |
| Integrin alpha-6 (Fragment) OS=Homo sapiens GN=ITGA6 PE=1 SV=1                                                                                  | ITGA6          | 30 kDa  | 0.085  | 0.2 | 0                               | 6  | 5  | 2  | 0  |
| Complement decay-accelerating factor OS=Homo sapiens GN=CD55 PE=4 SV=1                                                                          | CD55           | 41 kDa  | 0.079  | 0.8 | 0                               | 4  | 4  | 3  | 3  |
| Inter-alpha (Globulin) inhibitor H2 OS=Homo sapiens GN=ITI2 PE=2 SV=1                                                                           | ITI2           | 106 kDa | 0.066  | 3.6 | 0                               | 2  | 2  | 5  | 8  |
| Ribosomal protein S5, isoform CRA_a OS=Homo sapiens GN=RPS5 PE=3 SV=1                                                                           | RPS5           | 23 kDa  | 0.28   | 0.6 | 0                               | 6  | 5  | 4  | 2  |
| Protein arginine N-methyltransferase 5 OS=Homo sapiens PE=2 SV=1                                                                                |                | 73 kDa  | 0.086  | 0.3 | 0                               | 7  | 5  | 2  | 1  |
| AP-1 complex subunit beta-1 (Fragment) OS=Homo sapiens GN=AP1B1 PE=1 SV=1                                                                       | AP1B1          | 65 kDa  | 0.085  | 0.4 | 0                               | 19 | 14 | 6  | 6  |
| S-formylglutathione hydrolase OS=Homo sapiens GN=ESD PE=2 SV=1                                                                                  | ESD            | 31 kDa  | 0.088  | 0.2 | 0                               | 8  | 5  | 1  | 1  |
| cDNA, FLJ96587, highly similar to Homo sapiens SUMO-1 activating enzyme subunit 2 (UBA2), mRNA OS=Homo sapiens PE=2 SV=1                        |                | 71 kDa  | 0.18   | 0.3 | 0                               | 5  | 10 | 3  | 1  |
| Putative uncharacterized protein XRCC5 (Fragment) OS=Homo sapiens GN=XRCC5 PE=4 SV=1                                                            | XRCC5          | 18 kDa  | 0.08   | 0.3 | 0                               | 5  | 8  | 2  | 1  |
| cDNA, FLJ96792, highly similar to Homo sapiens calmodulin 2 (phosphorylase kinase, delta) (CALM2), mRNA OS=Homo sapiens PE=2 SV=1               |                | 17 kDa  | 0.082  | 0.2 | 0                               | 8  | 7  | 0  | 3  |
| Topoisomerase (DNA) I OS=Homo sapiens GN=TOP1 PE=2 SV=1                                                                                         | TOP1           | 91 kDa  | 0.019  | 0.1 | Fibro-BKO low, Fibro-Naive high | 12 | 10 | 1  | 1  |
| LRP1 protein OS=Homo sapiens GN=LRP1 PE=1 SV=1                                                                                                  | LRP1           | 48 kDa  | 0.0014 | INF | Fibro-BKO high, Fibro-Naive low | 0  | 0  | 7  | 7  |
| Capping protein (Actin filament) muscle Z-line, alpha 1, isoform CRA_a OS=Homo sapiens GN=CAPZA1 PE=3 SV=1                                      | CAPZA1         | 33 kDa  | 0.38   | 1.1 | 0                               | 4  | 5  | 4  | 5  |
| cDNA FU76282, highly similar to Homo sapiens proteasome (prosome, macropain) 26S subunit, non-ATPase, 5 (PSMD5), mRNA OS=Homo sapiens PE=2 SV=1 |                | 56 kDa  | 0.63   | 0.9 | 0                               | 5  | 4  | 4  | 3  |
| Alpha-1,4 glucan phosphorylase (Fragment) OS=Homo sapiens PE=2 SV=1                                                                             |                | 99 kDa  | 0.054  | 0.4 | 0                               | 64 | 52 | 22 | 23 |
| WASF2 protein (Fragment) OS=Homo sapiens GN=WASF2 PE=2 SV=1                                                                                     | WASF2          | 21 kDa  | 0.18   | 0.9 | 0                               | 5  | 5  | 4  | 4  |
| Tubulin alpha chain (Fragment) OS=Homo sapiens GN=TUBA4A PE=1 SV=1                                                                              | TUBA4A         | 20 kDa  | 0.44   | 1.2 | 0                               | 11 | 9  | 9  | 12 |
| cDNA FLJ52118, highly similar to 14-3-3 protein theta OS=Homo sapiens PE=2 SV=1                                                                 |                | 24 kDa  | 0.083  | 0.4 | 0                               | 12 | 9  | 4  | 4  |
| cDNA FLJ60461, highly similar to Peroxiredoxin-2 (EC 1.11.1.15) OS=Homo sapiens PE=2 SV=1                                                       |                | 20 kDa  | 0.14   | 0.7 | 0                               | 7  | 7  | 5  | 4  |
| SFPQ protein (Fragment) OS=Homo sapiens GN=SFPQ PE=2 SV=1                                                                                       | SFPQ           | 55 kDa  | 0.089  | 0.4 | 0                               | 7  | 5  | 2  | 2  |
| Spectrin, alpha, non-erythrocytic 1 (Alpha-fodrin), isoform CRA_g OS=Homo sapiens GN=SPTAN1 PE=4 SV=1                                           | SPTAN1         | 282 kDa | 0.28   | 0.5 | 0                               | 3  | 7  | 2  | 2  |
| Cleavage and polyadenylation specific factor 1, 160kDa, isoform CRA_a OS=Homo sapiens GN=CPSF1 PE=4 SV=1                                        | CPSF1          | 152 kDa | 0.088  | 0.6 | 0                               | 5  | 5  | 3  | 2  |
| E3 ubiquitin-protein ligase UBR4 (Fragment) OS=Homo sapiens GN=UBR4 PE=1 SV=1                                                                   | UBR4           | 225 kDa | 0.025  | 2.8 | Fibro-BKO high, Fibro-Naive low | 3  | 3  | 8  | 7  |
| Epididymis secretory sperm binding protein Li 95n OS=Homo sapiens GN=HEL-S-95n PE=2 SV=1                                                        | HEL-S-95n      | 38 kDa  | 0.14   | 0.4 | 0                               | 7  | 5  | 1  | 3  |
| 40S ribosomal protein S16 OS=Homo sapiens GN=RPS16 PE=1 SV=1                                                                                    | RPS16          | 14 kDa  | 0.037  | 0.3 | Fibro-BKO low, Fibro-Naive high | 5  | 5  | 2  | 1  |
| cDNA FLJ78217 OS=Homo sapiens PE=2 SV=1                                                                                                         |                | 40 kDa  | 0.55   | 1.5 | 0                               | 1  | 5  | 3  | 5  |
| Profilin (Fragment) OS=Homo sapiens GN=PFN1 PE=1 SV=1                                                                                           | PFN1           | 18 kDa  | 0.43   | 0.8 | 0                               | 7  | 7  | 6  | 4  |
| 60S ribosomal protein L7a (Fragment) OS=Homo sapiens GN=RPL7A PE=1 SV=1                                                                         | RPL7A          | 22 kDa  | 0.061  | 0.3 | 0                               | 9  | 7  | 2  | 3  |
| Proteasome subunit beta type-3 (Fragment) OS=Homo sapiens GN=PSMB3 PE=1 SV=1                                                                    | PSMB3          | 16 kDa  | 0.42   | 1.6 | 0                               | 1  | 4  | 3  | 4  |
| Brain-specific angiogenesis inhibitor 1-associated protein 2 OS=Homo sapiens GN=BAIAP2 PE=1 SV=1                                                | BAIAP2         | 61 kDa  | 0.34   | 0.6 | 0                               | 4  | 6  | 1  | 4  |
| Albumin (Fragment) OS=Homo sapiens PE=2 SV=1                                                                                                    |                | 67 kDa  | 0.021  | 2.5 | Fibro-BKO high, Fibro-Naive low | 8  | 7  | 15 | 19 |
| Proteasome endopeptidase complex OS=Homo sapiens GN=HEL-S-275 PE=2 SV=1                                                                         | HEL-S-275      | 30 kDa  | 0.2    | 1.6 | 0                               | 4  | 5  | 5  | 8  |
| cDNA FLJ52684, highly similar to Dynein heavy chain, cytosolic OS=Homo sapiens PE=2 SV=1                                                        |                | 28 kDa  | 0.021  | 2.3 | Fibro-BKO high, Fibro-Naive low | 2  | 3  | 5  | 5  |
| cDNA PSEC0048 fis, clone NT2RP2000028, highly similar to Serine protease 23 OS=Homo sapiens PE=2 SV=1                                           |                | 43 kDa  | 0.0037 | 2.8 | Fibro-BKO high, Fibro-Naive low | 2  | 2  | 5  | 5  |
| Plectin (Fragment) OS=Homo sapiens GN=PLEC PE=1 SV=1                                                                                            | PLEC           | 81 kDa  | 0.38   | 0.8 | 0                               | 4  | 6  | 3  | 4  |
| Vacuolar protein sorting 4B (Yeast), isoform CRA_a OS=Homo sapiens GN=VPS4B PE=3 SV=1                                                           | VPS4B          | 49 kDa  | 0.093  | 2.1 | 0                               | 2  | 3  | 5  | 4  |
| cDNA FLJ55534, highly similar to 4-trimethylaminobutylaldehyde dehydrogenase (EC 1.2.1.47) OS=Homo sapiens PE=2 SV=1                            |                | 53 kDa  | 0.075  | 0.5 | 0                               | 5  | 4  | 2  | 2  |
| RPL14 protein (Fragment) OS=Homo sapiens GN=RPL14 PE=2 SV=1                                                                                     | RPL14          | 15 kDa  | 0.13   | 0.3 | 0                               | 6  | 4  | 2  | 1  |
| Guanine nucleotide-binding protein G, alpha subunit variant (Fragment) OS=Homo sapiens PE=2 SV=1                                                |                | 42 kDa  | 0.48   | 1.6 | 0                               | 2  | 6  | 7  | 4  |
| 40S ribosomal protein S13 OS=Homo sapiens GN=RPS13 PE=1 SV=1                                                                                    | RPS13          | 17 kDa  | 0.45   | 0.7 | 0                               | 3  | 2  | 2  | 1  |
| Histone H2A OS=Homo sapiens GN=H2AFV PE=1 SV=1                                                                                                  | H2AFV          | 13 kDa  | 0.0018 | 0.2 | Fibro-BKO low, Fibro-Naive high | 6  | 6  | 1  | 1  |
| Interferon induced transmembrane protein 1 (9-27), isoform CRA_a OS=Homo sapiens GN=IFITM1 PE=4 SV=1                                            | IFITM1         | 14 kDa  | 0.045  | 2   | Fibro-BKO high, Fibro-Naive low | 4  | 4  | 6  | 8  |
| Calpain 1, (Mu/I) large subunit, isoform CRA_a OS=Homo sapiens GN=CAPN1 PE=3 SV=1                                                               | CAPN1          | 82 kDa  | 0.6    | 0.7 | 0                               | 4  | 4  | 4  | 1  |
| Dipeptidase OS=Homo sapiens PE=2 SV=1                                                                                                           |                | 46 kDa  | 0.31   | 1.3 | 0                               | 3  | 3  | 4  | 3  |
| Septin 9, isoform CRA_a OS=Homo sapiens GN=SEPT9 PE=3 SV=1                                                                                      |                | 64 kDa  | 0.32   | 0.5 | 0                               | 4  | 7  | 1  | 4  |
| Proteasome subunit beta type OS=Homo sapiens GN=PSMB6 PE=2 SV=1                                                                                 | PSMB6          | 25 kDa  | 0.62   | 1.8 | 0                               | 2  | 3  | 1  | 5  |
| HCG2044799 OS=Homo sapiens GN=HNRNPUL2-BSCL2 PE=4 SV=1                                                                                          | HNRNPUL2-BSCL2 | 85 kDa  | 0.017  | 0.2 | Fibro-BKO low, Fibro-Naive high | 6  | 8  | 1  | 1  |
| cDNA FLJ57882, highly similar to Pre-mRNA-processing-splicing factor 8 OS=Homo sapiens PE=2 SV=1                                                |                | 123 kDa | 0.21   | 0.4 | 0                               | 3  | 6  | 2  | 1  |
| Myoferlin (Fragment) OS=Homo sapiens GN=MYOF PE=1 SV=1                                                                                          | MYOF           | 135 kDa | 0.074  | 7.8 | 0                               | 1  | 1  | 5  | 9  |
| HCG30204, isoform CRA_a OS=Homo sapiens GN=hCG_30204 PE=4 SV=1                                                                                  | hCG_30204      | 257 kDa | 0.4    | 2.1 | 0                               | 0  | 5  | 5  | 4  |
| Spectrin beta chain, non-erythrocytic 1 OS=Homo sapiens GN=SPTBN1 PE=1 SV=1                                                                     | SPTBN1         | 275 kDa | 0.24   | 0.2 | 0                               | 3  | 8  | 2  | 0  |
| Epididymis luminal protein 113 OS=Homo sapiens GN=HEL113 PE=2 SV=1                                                                              | HEL113         | 54 kDa  | 0.011  | INF | Fibro-BKO high, Fibro-Naive low | 0  | 0  | 8  | 7  |
| RAB5C, member RAS oncogene family, isoform CRA_a OS=Homo sapiens GN=RAB5C PE=4 SV=1                                                             | RAB5C          | 23 kDa  | 0.017  | 0.7 | Fibro-BKO low, Fibro-Naive high | 5  | 5  | 3  | 3  |
| Vesicle amine transport protein 1 homolog (T californica), isoform CRA_a OS=Homo sapiens GN=VAT1 PE=4 SV=1                                      | VAT1           | 42 kDa  | 0.58   | 0.8 | 0                               | 4  | 4  | 2  | 4  |
| V-ral simian leukemia viral oncogene homolog B (Ras related GTP binding protein), isoform CRA_a OS=Homo sapiens GN=RALB                         | RALB           | 23 kDa  | 0.79   | 1.1 | 0                               | 5  | 4  | 3  | 6  |
| Nucleophosmin isoform 2 (Fragment) OS=Homo sapiens GN=NPM1 PE=2 SV=1                                                                            | NPM1           | 33 kDa  | 0.97   | 1   | 0                               | 4  | 4  | 4  | 3  |
| Dihydropyrimidinase-related protein 2 OS=Homo sapiens GN=DPYSL2 PE=1 SV=1                                                                       | DPYSL2         | 74 kDa  | 0.0099 | 0.4 | Fibro-BKO low, Fibro-Naive high | 5  | 6  | 2  | 2  |

|                                                                                                                                                        |                |         |        |      |   |    |    |    |    |
|--------------------------------------------------------------------------------------------------------------------------------------------------------|----------------|---------|--------|------|---|----|----|----|----|
| Putative uncharacterized protein DKFZp547A0616 (Fragment) OS=Homo sapiens GN=DKFZp547A0616 PE=2 SV=1                                                   | DKFZp547A0616  | 20 kDa  | 0.11   | 3.1  | 0 | 2  | 2  | 4  | 7  |
| Arrestin domain containing 1 variant (Fragment) OS=Homo sapiens PE=2 SV=1                                                                              |                | 35 kDa  | 0.091  | 1.8  | 0 | 4  | 7  | 8  | 9  |
| cDNA FLJ56126, highly similar to Programmed cell death 6-interacting protein OS=Homo sapiens PE=2 SV=1                                                 |                | 72 kDa  | 0.32   | 1.1  | 0 | 41 | 51 | 47 | 45 |
| ATP-binding cassette, sub-family C, member 3 isoform MRP3 variant (Fragment) OS=Homo sapiens PE=2 SV=1                                                 |                | 170 kDa | 0.55   | 1.6  | 0 | 1  | 5  | 5  | 3  |
| DnaJ (Hsp40) homolog, subfamily A, member 2, isoform CRA_a OS=Homo sapiens GN=DNAJA2 PE=3 SV=1                                                         | DNAJA2         | 46 kDa  | 0.1    | 0.5  | 0 | 3  | 4  | 1  | 2  |
| cDNA FLJ78448, highly similar to Homo sapiens argininosuccinate synthetase (ASS), transcript variant 1, mRNA OS=Homo sapiens PE=2 SV=1                 |                | 47 kDa  | 0.04   | 0.5  | 0 | 5  | 6  | 2  | 3  |
| 60S ribosomal protein L10 (Fragment) OS=Homo sapiens GN=RPL10 PE=1 SV=7                                                                                | RPL10          | 23 kDa  | 0.0034 | 0.4  | 0 | 5  | 3  | 1  | 1  |
| Phospholipid scramblase OS=Homo sapiens GN=hCG_1987383 PE=3 SV=1                                                                                       | hCG_1987383    | 38 kDa  | 0.25   | 1.4  | 0 | 4  | 3  | 5  | 4  |
| Protein S100 OS=Homo sapiens PE=2 SV=1                                                                                                                 |                | 10 kDa  | 0.0099 | 0.4  | 0 | 5  | 6  | 2  | 2  |
| cDNA FLJ58882, highly similar to 26S proteasome non-ATPase regulatory subunit 11 OS=Homo sapiens PE=2 SV=1                                             |                | 35 kDa  | 0.043  | 0.1  | 0 | 5  | 4  | 0  | 1  |
| Nuclear cap binding protein subunit 1, 80kDa, isoform CRA_a OS=Homo sapiens GN=NCBP1 PE=4 SV=1                                                         | NCBP1          | 92 kDa  | 0.03   | 0.09 | 0 | 5  | 7  | 0  | 1  |
| SARS protein OS=Homo sapiens GN=SARS PE=2 SV=1                                                                                                         | SARS           | 58 kDa  | 0.068  | 0.2  | 0 | 5  | 7  | 0  | 2  |
| THO complex subunit 2 OS=Homo sapiens GN=THOC2 PE=1 SV=1                                                                                               | THOC2          | 170 kDa | 0.05   | 0    | 0 | 6  | 4  | 0  | 0  |
| Putative uncharacterized protein DKFZp686C11235 OS=Homo sapiens GN=DKFZp686C11235 PE=2 SV=1                                                            | DKFZp686C11235 | 52 kDa  | 0.2    | INF  | 0 | 0  | 0  | 4  | 14 |
| Thyroglobulin OS=Homo sapiens GN=TG PE=2 SV=1                                                                                                          | TG             | 305 kDa | 0.11   | INF  | 0 | 0  | 0  | 8  | 4  |
| High mobility group AT-hook 1 OS=Homo sapiens GN=HMGA1 PE=2 SV=1                                                                                       | HMGA1          | 11 kDa  | 0.0019 | 0    | 0 | 6  | 7  | 0  | 0  |
| Calcium/calmodulin-dependent protein kinase (CaM kinase) II delta, isoform CRA_a OS=Homo sapiens GN=CAMK2D PE=2 SV=1                                   | CAMK2D         | 56 kDa  | 0.89   | 0.9  | 0 | 4  | 3  | 2  | 4  |
| Uridine diphospho-glucose dehydrogenase (Fragment) OS=Homo sapiens GN=GDH PE=4 SV=1                                                                    | GDH            | 18 kDa  | 0.093  | 2.1  | 0 | 2  | 3  | 5  | 4  |
| Secretory carrier-associated membrane protein (Fragment) OS=Homo sapiens GN=SCAMP3 PE=2 SV=1                                                           | SCAMP3         | 38 kDa  | 0.14   | 0.4  | 0 | 6  | 4  | 2  | 2  |
| Polyadenylate-binding protein OS=Homo sapiens GN=PABPC1 PE=3 SV=1                                                                                      | PABPC1         | 71 kDa  | 0.47   | 1.8  | 0 | 3  | 2  | 2  | 6  |
| Amino acid transporter (Fragment) OS=Homo sapiens PE=2 SV=1                                                                                            |                | 57 kDa  | 0.24   | 0.9  | 0 | 27 | 34 | 21 | 25 |
| Ras homolog gene family, member A, isoform CRA_a OS=Homo sapiens GN=RHOA PE=4 SV=1                                                                     | RHOA           | 22 kDa  | 0.51   | 0.8  | 0 | 12 | 7  | 6  | 7  |
| Guanine nucleotide binding protein (G protein), alpha 13, isoform CRA_a OS=Homo sapiens GN=GNA13 PE=4 SV=1                                             | GNA13          | 44 kDa  | 0.87   | 1.1  | 0 | 1  | 5  | 2  | 4  |
| cDNA FLJ76863, highly similar to Homo sapiens stress-induced-phosphoprotein 1 (Hsp70/Hsp90-organizing protein) (STIP1), mRNA OS=Homo sapiens PE=2 SV=1 |                | 63 kDa  | 0.1    | 0.2  | 0 | 4  | 5  | 0  | 2  |
| cDNA, FLJ96812, highly similar to Homo sapiens threonyl-tRNA synthetase (TARS), mRNA OS=Homo sapiens PE=1 SV=1                                         |                | 82 kDa  | 0.0034 | 0.4  | 0 | 3  | 3  | 1  | 1  |
| Serpin peptidase inhibitor, clade C (Antithrombin), member 1, isoform CRA_a OS=Homo sapiens GN=SERPINC1 PE=3 SV=1                                      | SERPINC1       | 53 kDa  | 0.035  | 3    | 0 | 2  | 1  | 4  | 4  |
| Integrin beta OS=Homo sapiens GN=ITGB3 PE=2 SV=1                                                                                                       | ITGB3          | 87 kDa  | 0.073  | 5.7  | 0 | 1  | 1  | 6  | 4  |
| Tetraspanin OS=Homo sapiens GN=CD63 PE=3 SV=1                                                                                                          | CD63           | 26 kDa  | 0.5    | 1.5  | 0 | 3  | 2  | 2  | 5  |
| 60S acidic ribosomal protein P0 OS=Homo sapiens GN=RPLP0 PE=3 SV=1                                                                                     | RPLP0          | 34 kDa  | 0.03   | 0.1  | 0 | 6  | 5  | 0  | 1  |
| Eukaryotic translation initiation factor 3 subunit E OS=Homo sapiens GN=EIF3E PE=2 SV=1                                                                | EIF3E          | 52 kDa  | 0.2    | 0    | 0 | 3  | 1  | 0  | 0  |
| Pre-B-cell colony enhancing factor 1, isoform CRA_a OS=Homo sapiens GN=PBFE1 PE=4 SV=1                                                                 | PBFE1          | 56 kDa  | 0.026  | 0.1  | 0 | 4  | 5  | 0  | 1  |
| Testicular tissue protein Li 82 OS=Homo sapiens PE=2 SV=1                                                                                              |                | 77 kDa  | 0.0059 | 0    | 0 | 4  | 5  | 0  | 0  |
| Aspartate aminotransferase OS=Homo sapiens PE=2 SV=1                                                                                                   |                | 46 kDa  | 0.017  | 0    | 0 | 5  | 7  | 0  | 0  |
| DNA-directed RNA polymerase subunit beta OS=Homo sapiens PE=2 SV=1                                                                                     |                | 133 kDa | 0.063  | 0    | 0 | 8  | 5  | 0  | 0  |
| cDNA FLJ46846 fis, clone UTERU3004635, moderately similar to Neuroblast differentiation associated protein AHNAK (Fragment) OS=Homo sapiens PE=2 SV=1  |                | 181 kDa | 0.52   | 1.1  | 0 | 3  | 4  | 3  | 4  |
| Disk large homolog 1 OS=Homo sapiens GN=DLG1 PE=1 SV=1                                                                                                 | DLG1           | 100 kDa | 0.7    | 1.1  | 0 | 2  | 3  | 3  | 2  |
| Abl interactor 1 OS=Homo sapiens GN=ABI1 PE=1 SV=1                                                                                                     | ABI1           | 52 kDa  | 0.23   | 1.5  | 0 | 2  | 4  | 4  | 4  |
| Amino acid transporter OS=Homo sapiens GN=SLC1A5 PE=2 SV=1                                                                                             | SLC1A5         | 57 kDa  | 0.1    | 0.9  | 0 | 27 | 31 | 21 | 24 |
| Proteasome subunit beta type (Fragment) OS=Homo sapiens GN=PSMB8 PE=2 SV=1                                                                             | PSMB8          | 30 kDa  | 0.77   | 1.1  | 0 | 3  | 3  | 4  | 2  |
| Transportin 3, isoform CRA_b OS=Homo sapiens GN=TNPO3 PE=4 SV=1                                                                                        | TNPO3          | 104 kDa | 0.48   | 0.7  | 0 | 2  | 5  | 2  | 2  |
| cDNA FLJ78244, highly similar to Homo sapiens eukaryotic translation initiation factor 4A, isoform 1 (EIF4A1), mRNA OS=Homo sapiens PE=2 SV=1          |                | 46 kDa  | 0.11   | 1.9  | 0 | 3  | 5  | 7  | 6  |
| Dihydrolypoamide S-succinyltransferase (E2 component of 2-oxo-glutarate complex), isoform CRA_a OS=Homo sapiens GN=DLST PE=2 SV=1                      | DLST           | 49 kDa  | 0.18   | 0.6  | 0 | 4  | 3  | 2  | 2  |
| KLK10 protein (Fragment) OS=Homo sapiens GN=KLK10 PE=2 SV=1                                                                                            | KLK10          | 30 kDa  | 0.17   | 0.4  | 0 | 3  | 5  | 2  | 1  |
| ADP-ribosylation factor 6 OS=Homo sapiens PE=2 SV=1                                                                                                    |                | 20 kDa  | 0.86   | 1.1  | 0 | 2  | 1  | 1  | 2  |
| RAB21, member RAS oncogene family, isoform CRA_a OS=Homo sapiens GN=RAB21 PE=4 SV=1                                                                    | RAB21          | 24 kDa  | 0.17   | 0.4  | 0 | 3  | 5  | 2  | 1  |
| Tropomyosin 3 isoform 1 (Fragment) OS=Homo sapiens GN=TPM3 PE=2 SV=1                                                                                   | TPM3           | 29 kDa  | 0.0099 | 0.4  | 0 | 5  | 6  | 2  | 2  |
| ST3 beta-galactoside alpha-2,3-sialyltransferase 1, isoform CRA_a OS=Homo sapiens GN=ST3GAL1 PE=3 SV=1                                                 | ST3GAL1        | 39 kDa  | 0.011  | 1.7  | 0 | 2  | 2  | 3  | 3  |
| Uridine diphospho-glucose dehydrogenase (Fragment) OS=Homo sapiens GN=GDH PE=4 SV=1                                                                    | GDH            | 17 kDa  | 0.7    | 1.1  | 0 | 2  | 3  | 3  | 2  |
| Calcium binding protein 39, isoform CRA_a OS=Homo sapiens GN=CAB39 PE=4 SV=1                                                                           | CAB39          | 40 kDa  | 0.68   | 0.7  | 0 | 1  | 4  | 2  | 1  |
| cDNA FLJ10153 fis, clone HEMBA1003417, highly similar to BAG family molecular chaperone regulator 2 OS=Homo sapiens PE=2 SV=1                          |                | 24 kDa  | 0.0024 | 0.3  | 0 | 4  | 4  | 1  | 1  |
| Annexin OS=Homo sapiens PE=2 SV=1                                                                                                                      |                | 53 kDa  | 0.39   | 0.7  | 0 | 3  | 2  | 1  | 2  |
| Septin-2 OS=Homo sapiens GN=SEPT2 PE=1 SV=1                                                                                                            |                | 37 kDa  | 0.019  | 0.3  | 0 | 11 | 11 | 2  | 4  |
| Eukaryotic translation initiation factor 3 subunit C OS=Homo sapiens GN=EIF3S8 PE=3 SV=1                                                               | EIF3S8         | 105 kDa | 0.23   | 0.3  | 0 | 2  | 5  | 1  | 1  |
| Epididymal secretory sperm binding protein Li 8a OS=Homo sapiens GN=HEL-S-8a PE=2 SV=1                                                                 | HEL-S-8a       | 31 kDa  | 0.023  | 0.3  | 0 | 5  | 6  | 1  | 2  |
| Obg-like ATPase 1 OS=Homo sapiens GN=OLA1 PE=1 SV=1                                                                                                    | OLA1           | 47 kDa  | 0.46   | 0.7  | 0 | 4  | 3  | 3  | 1  |
| Copine III, isoform CRA_a OS=Homo sapiens GN=CPNE3 PE=4 SV=1                                                                                           | CPNE3          | 60 kDa  | 0.0082 | 0.6  | 0 | 4  | 4  | 2  | 2  |
| cDNA FLJ53963, highly similar to Leukocyte elastase inhibitor OS=Homo sapiens PE=2 SV=1                                                                |                | 39 kDa  | 0.27   | 0.3  | 0 | 2  | 6  | 1  | 1  |
| cDNA FLJ61545, highly similar to Coatomer subunit beta OS=Homo sapiens PE=2 SV=1                                                                       |                | 31 kDa  | 0.055  | 0.3  | 0 | 6  | 5  | 2  | 1  |
| Ribosomal protein L5 OS=Homo sapiens GN=RPL5 PE=2 SV=1                                                                                                 | RPL5           | 34 kDa  | 0.045  | 0.3  | 0 | 6  | 5  | 1  | 2  |



|                                                                                                                        |           |         |        |     |                                 |    |    |    |    |
|------------------------------------------------------------------------------------------------------------------------|-----------|---------|--------|-----|---------------------------------|----|----|----|----|
| Scavenger receptor class B, member 2, isoform CRA_a OS=Homo sapiens GN=SCARB2 PE=3 SV=1                                | SCARB2    | 54 kDa  | 0.0033 | 0   | Fibro-BKO low, Fibro-Naive high | 5  | 6  | 0  | 0  |
| Adenine phosphoribosyltransferase (Fragment) OS=Homo sapiens GN=APRT PE=1 SV=8                                         | APRT      | 16 kDa  | 0.33   | 0.3 | []                              | 7  | 3  | 0  | 3  |
| cDNA FLJ58269, highly similar to Bifunctional aminoacyl-tRNA synthetase OS=Homo sapiens PE=2 SV=1                      |           | 54 kDa  | 0.02   | 0   | Fibro-BKO low, Fibro-Naive high | 5  | 4  | 0  | 0  |
| 2'-5'-oligoadenylate synthetase 3, 100kDa, isoform CRA_a OS=Homo sapiens GN=OAS3 PE=4 SV=1                             | OAS3      | 121 kDa | 0.15   | 0.1 | []                              | 6  | 3  | 0  | 1  |
| cDNA FLJ13913 fis, clone Y79AA1000231, highly similar to Nucleolar protein NOP5 OS=Homo sapiens PE=2 SV=1              |           | 52 kDa  | 0.015  | 0   | Fibro-BKO low, Fibro-Naive high | 6  | 5  | 0  | 0  |
| Laminin, beta 2 (Laminin S), isoform CRA_a OS=Homo sapiens GN=LAMB2 PE=4 SV=1                                          | LAMB2     | 196 kDa | 0.0014 | INF | Fibro-BKO high, Fibro-Naive low | 0  | 0  | 5  | 6  |
| Heat shock 60kDa protein 1 (Chaperonin), isoform CRA_a OS=Homo sapiens GN=HSPD1 PE=2 SV=1                              | HSPD1     | 61 kDa  | 0.081  | 0   | []                              | 7  | 4  | 0  | 0  |
| cDNA FLJ42779 fis, clone BRAWH3005300, highly similar to Exportin-1 OS=Homo sapiens PE=2 SV=1                          |           | 82 kDa  | 0.05   | 0   | Fibro-BKO low, Fibro-Naive high | 6  | 4  | 0  | 0  |
| Epididymis secretory sperm binding protein Li 71p OS=Homo sapiens GN=HEL-S-71p PE=2 SV=1                               | HEL-S-71p | 77 kDa  | 0.42   | INF | []                              | 0  | 0  | 12 | 0  |
| RAP1B, member of RAS oncogene family, isoform CRA_a OS=Homo sapiens GN=RAP1B PE=4 SV=1                                 | RAP1B     | 21 kDa  | 0.6    | 1.1 | []                              | 9  | 9  | 9  | 8  |
| cDNA FLJ36998 fis, clone BRACE2007295, highly similar to ALPHA-ADAPTIN A OS=Homo sapiens PE=2 SV=1                     |           | 52 kDa  | 0.034  | 1.7 | Fibro-BKO high, Fibro-Naive low | 3  | 3  | 4  | 5  |
| Serine/threonine-protein phosphatase OS=Homo sapiens GN=HEL-S-80p PE=2 SV=1                                            | HEL-S-80p | 37 kDa  | 0.12   | 0.4 | []                              | 17 | 13 | 4  | 8  |
| Signal transducer and activator of transcription OS=Homo sapiens GN=STAT1 PE=1 SV=1                                    | STAT1     | 83 kDa  | 0.21   | 1.7 | []                              | 2  | 4  | 5  | 4  |
| Telomerase protein component 1 OS=Homo sapiens GN=TEP1 PE=1 SV=1                                                       | TEP1      | 278 kDa | 0.41   | 0.6 | []                              | 4  | 10 | 4  | 3  |
| Family with sequence similarity 49, member B, isoform CRA_a OS=Homo sapiens GN=FAM49B PE=4 SV=1                        | FAM49B    | 37 kDa  | 0.0082 | 0.6 | Fibro-BKO low, Fibro-Naive high | 4  | 4  | 2  | 2  |
| Ras-related protein Ral-A (Fragment) OS=Homo sapiens GN=RALA PE=1 SV=1                                                 | RALA      | 18 kDa  | 0.64   | 1.1 | []                              | 4  | 3  | 3  | 4  |
| Septin-11 OS=Homo sapiens GN=SEPT11 PE=1 SV=1                                                                          |           | 50 kDa  | 0.23   | 0.7 | []                              | 4  | 4  | 3  | 2  |
| Rho GDP-dissociation inhibitor 1 OS=Homo sapiens GN=ARHGDI1 PE=1 SV=1                                                  | ARHGDI1   | 15 kDa  | 0.03   | 0.8 | Fibro-BKO low, Fibro-Naive high | 3  | 3  | 2  | 2  |
| Aspartyl aminopeptidase, isoform CRA_b OS=Homo sapiens GN=DNPEP PE=3 SV=1                                              | DNPEP     | 52 kDa  | 0.62   | 0.8 | []                              | 3  | 3  | 3  | 1  |
| Tetraspanin OS=Homo sapiens GN=CD151 PE=3 SV=1                                                                         | CD151     | 28 kDa  | 0.25   | 2.3 | []                              | 1  | 3  | 5  | 3  |
| CSTB protein OS=Homo sapiens GN=CSTB PE=2 SV=1                                                                         | CSTB      | 11 kDa  | 0.046  | 0.4 | Fibro-BKO low, Fibro-Naive high | 4  | 4  | 1  | 2  |
| Testicular tissue protein Li 42 OS=Homo sapiens PE=2 SV=1                                                              |           | 30 kDa  | 0.58   | 1.4 | []                              | 3  | 1  | 2  | 3  |
| Nucleosome assembly protein 1-like 1, isoform CRA_a OS=Homo sapiens GN=NAP1L1 PE=3 SV=1                                | NAP1L1    | 45 kDa  | 0.83   | 0.9 | []                              | 3  | 3  | 3  | 2  |
| Drug-sensitive protein 1 OS=Homo sapiens GN=YA61 PE=2 SV=1                                                             | YA61      | 15 kDa  | 0.83   | 0.9 | []                              | 2  | 3  | 1  | 3  |
| cDNA FLJ59343, highly similar to Exportin-2 OS=Homo sapiens PE=2 SV=1                                                  |           | 69 kDa  | 0.12   | 0.3 | []                              | 5  | 9  | 2  | 2  |
| Protein scribble homolog OS=Homo sapiens GN=SCRIB PE=1 SV=1                                                            | SCRIB     | 175 kDa | 0.33   | 1.4 | []                              | 3  | 5  | 4  | 6  |
| UTP--glucose-1-phosphate uridylyltransferase OS=Homo sapiens GN=UGP2 PE=1 SV=1                                         | UGP2      | 57 kDa  | 0.76   | 0.8 | []                              | 1  | 5  | 2  | 2  |
| Eukaryotic translation initiation factor 3 subunit F OS=Homo sapiens GN=EIF3F PE=2 SV=1                                | EIF3F     | 39 kDa  | 0.98   | 1   | []                              | 4  | 3  | 5  | 1  |
| Fructose-bisphosphate aldolase OS=Homo sapiens GN=ALDOC PE=3 SV=1                                                      | ALDOC     | 39 kDa  | 0.92   | 0.9 | []                              | 6  | 9  | 7  | 2  |
| Platelet-activating factor acetylhydrolase, isoform lb, gamma subunit 29kDa, isoform CRA_a OS=Homo sapiens GN=PAFAH1B3 | PAFAH1B3  | 26 kDa  | 0.029  | 0.1 | Fibro-BKO low, Fibro-Naive high | 4  | 5  | 1  | 0  |
| FARSLA protein OS=Homo sapiens GN=FARSLA PE=2 SV=1                                                                     | FARSLA    | 58 kDa  | 0.061  | 0.3 | []                              | 4  | 3  | 1  | 1  |
| cDNA FLJ53750, highly similar to 60S ribosomal protein L8 OS=Homo sapiens PE=2 SV=1                                    |           | 21 kDa  | 0.85   | 1   | []                              | 4  | 3  | 3  | 3  |
| Ribosomal protein L13a variant (Fragment) OS=Homo sapiens PE=2 SV=1                                                    |           | 24 kDa  | 0.03   | 0.8 | Fibro-BKO low, Fibro-Naive high | 3  | 3  | 2  | 2  |
| cDNA FLJ54022, highly similar to Exportin-2 OS=Homo sapiens PE=2 SV=1                                                  |           | 86 kDa  | 0.15   | 0.2 | []                              | 4  | 9  | 1  | 1  |
| Core histone macro-H2A OS=Homo sapiens GN=H2AFY2 PE=4 SV=1                                                             | H2AFY2    | 40 kDa  | 0.064  | 0.1 | []                              | 15 | 11 | 3  | 0  |
| Coatamer subunit gamma OS=Homo sapiens PE=2 SV=1                                                                       |           | 98 kDa  | 0.08   | 0.2 | []                              | 10 | 8  | 3  | 0  |
| Periostin, osteoblast specific factor, isoform CRA_c OS=Homo sapiens GN=POSTN PE=4 SV=1                                | POSTN     | 93 kDa  | 0.036  | 11  | Fibro-BKO high, Fibro-Naive low | 0  | 1  | 5  | 4  |
| 40S ribosomal protein S7 OS=Homo sapiens GN=RPS7 PE=1 SV=1                                                             | RPS7      | 21 kDa  | 0.073  | 0.1 | []                              | 6  | 4  | 0  | 1  |
| Heterogeneous nuclear ribonucleoprotein A1, isoform CRA_b OS=Homo sapiens GN=HNRPA1 PE=4 SV=1                          | HNRPA1    | 39 kDa  | 0.027  | 0   | Fibro-BKO low, Fibro-Naive high | 4  | 6  | 0  | 0  |
| RSL1D1 protein (Fragment) OS=Homo sapiens GN=RSL1D1 PE=2 SV=1                                                          | RSL1D1    | 49 kDa  | 0.015  | 0   | Fibro-BKO low, Fibro-Naive high | 6  | 5  | 0  | 0  |
| cDNA FLJ54170, highly similar to Cytosolic nonspecific dipeptidase OS=Homo sapiens PE=2 SV=1                           |           | 52 kDa  | 0.037  | 0   | Fibro-BKO low, Fibro-Naive high | 5  | 8  | 0  | 0  |
| Ig lambda-2 chain C regions (Fragment) OS=Homo sapiens GN=IGLC2 PE=4 SV=1                                              | IGLC2     | 11 kDa  | 0.36   | INF | []                              | 0  | 0  | 2  | 26 |
| cDNA FLJ5253, highly similar to Actin, cytoplasmic 1 OS=Homo sapiens PE=2 SV=1                                         |           | 39 kDa  | 0.34   | 1.2 | []                              | 55 | 42 | 48 | 59 |
| C-type lysozyme OS=Homo sapiens GN=LYZ PE=2 SV=1                                                                       | LYZ       | 17 kDa  | 0.75   | 1.1 | []                              | 3  | 2  | 3  | 2  |
| Calcium-transporting ATPase OS=Homo sapiens GN=ATP2B1 PE=3 SV=1                                                        | ATP2B1    | 135 kDa | 0.77   | 1.1 | []                              | 3  | 8  | 6  | 5  |
| Golgi apparatus protein 1 OS=Homo sapiens GN=GLG1 PE=1 SV=1                                                            | GLG1      | 79 kDa  | 0.37   | 0.8 | []                              | 3  | 4  | 2  | 3  |
| Profilin OS=Homo sapiens GN=PFN1 PE=1 SV=1                                                                             | PFN1      | 11 kDa  | 0.88   | 1   | []                              | 6  | 5  | 5  | 5  |
| Uncharacterized protein OS=Homo sapiens GN=LOC93343 PE=4 SV=1                                                          | LOC93343  | 29 kDa  | 0.77   | 1.1 | []                              | 3  | 3  | 2  | 4  |
| Ubiquitin-like protein ISG15 (Fragment) OS=Homo sapiens GN=ISG15 PE=1 SV=6                                             | ISG15     | 16 kDa  | 0.53   | 0.8 | []                              | 4  | 3  | 3  | 2  |
| UMP-CMP kinase OS=Homo sapiens GN=CMPK PE=2 SV=1                                                                       | CMPK      | 26 kDa  | 0.51   | 1.4 | []                              | 1  | 3  | 2  | 3  |
| Tubulin alpha chain OS=Homo sapiens PE=2 SV=1                                                                          |           | 43 kDa  | 0.3    | 0.8 | []                              | 44 | 36 | 24 | 32 |
| Synaptosomal-associated protein OS=Homo sapiens GN=SNAP23 PE=2 SV=1                                                    | SNAP23    | 23 kDa  | 0.31   | 1.7 | []                              | 2  | 2  | 2  | 4  |
| Guanine nucleotide-binding protein G(i) subunit alpha-1 (Fragment) OS=Homo sapiens GN=GNAI1 PE=1 SV=1                  | GNAI1     | 16 kDa  | 0.23   | 1.9 | []                              | 2  | 4  | 6  | 4  |
| N-myc downstream regulated gene 1, isoform CRA_b OS=Homo sapiens GN=NDRG1 PE=4 SV=1                                    | NDRG1     | 39 kDa  | 0.55   | 0.7 | []                              | 4  | 2  | 2  | 2  |
| TOM1-like protein 1 OS=Homo sapiens GN=TOM1L1 PE=1 SV=1                                                                | TOM1L1    | 52 kDa  | 0.081  | 2.2 | []                              | 2  | 1  | 3  | 3  |
| Annexin OS=Homo sapiens GN=ANXA3 PE=1 SV=1                                                                             | ANXA3     | 32 kDa  | 0.041  | 0.4 | Fibro-BKO low, Fibro-Naive high | 9  | 10 | 4  | 2  |
| Epididymis secretory protein Li 303 OS=Homo sapiens GN=HEL-S-303 PE=2 SV=1                                             | HEL-S-303 | 26 kDa  | 0.18   | 0.6 | []                              | 3  | 3  | 2  | 1  |
| Alpha-1,4 glucan phosphorylase OS=Homo sapiens PE=2 SV=1                                                               |           | 97 kDa  | 0.065  | 0.3 | []                              | 12 | 19 | 4  | 3  |
| Ubiquitin specific peptidase 9, X-linked, isoform CRA_b OS=Homo sapiens GN=USP9X PE=3 SV=1                             | USP9X     | 271 kDa | 0.34   | 0.7 | []                              | 2  | 3  | 1  | 2  |

|                                                                                                                                                             |               |         |         |     |   |    |    |    |    |
|-------------------------------------------------------------------------------------------------------------------------------------------------------------|---------------|---------|---------|-----|---|----|----|----|----|
| Related RAS viral (R-ras) oncogene homolog, isoform CRA_a OS=Homo sapiens GN=RRAS PE=4 SV=1                                                                 | RRAS          | 23 kDa  | 0.42    | 2.3 | 0 | 1  | 3  | 6  | 2  |
| Equilibrative nucleoside transporter 1 variant ata (Fragment) OS=Homo sapiens GN=SLC29A1 PE=4 SV=1                                                          | SLC29A1       | 8 kDa   | 0.11    | 2   | 0 | 2  | 2  | 4  | 3  |
| Testis tissue sperm-binding protein Li 69n OS=Homo sapiens PE=2 SV=1                                                                                        |               | 35 kDa  | 0.39    | 0.7 | 0 | 3  | 2  | 1  | 2  |
| Fructose-1,6-bisphosphatase 1 OS=Homo sapiens GN=FBP1 PE=2 SV=1                                                                                             | FBP1          | 37 kDa  | 0.044   | 0.4 | 0 | 4  | 5  | 1  | 2  |
| Tryptophanyl-tRNA synthetase, isoform CRA_a OS=Homo sapiens GN=WARS PE=3 SV=1                                                                               | WARS          | 53 kDa  | 0.14    | 0.5 | 0 | 3  | 3  | 2  | 1  |
| Protein diaphanous homolog 1 OS=Homo sapiens GN=DIAPH1 PE=1 SV=1                                                                                            | DIAPH1        | 141 kDa | 0.082   | 0.3 | 0 | 3  | 5  | 1  | 1  |
| cDNA, FLJ93507, highly similar to Homo sapiens ATPase, H+ transporting, lysosomal 38kDa, V0 subunit d isoform 1 (ATP6V0D1), mRNA OS=Homo sapiens PE=2 SV=1  |               | 40 kDa  | 0.22    | 0.3 | 0 | 4  | 3  | 2  | 0  |
| MHC class I antigen (Fragment) OS=Homo sapiens GN=HLA-B PE=3 SV=1                                                                                           | HLA-B         | 21 kDa  | 0.24    | 0.7 | 0 | 5  | 5  | 2  | 4  |
| CD276 antigen OS=Homo sapiens GN=CD276 PE=1 SV=1                                                                                                            | CD276         | 42 kDa  | 0.45    | 1.7 | 0 | 1  | 3  | 4  | 2  |
| FLJ00095 protein (Fragment) OS=Homo sapiens GN=FLJ00095 PE=2 SV=1                                                                                           | FLJ00095      | 16 kDa  | 0.0082  | 0.6 | 0 | 4  | 4  | 2  | 2  |
| Proteasome subunit beta type-5 (Fragment) OS=Homo sapiens GN=PSMB5 PE=1 SV=1                                                                                | PSMB5         | 13 kDa  | 0.2     | 3.5 | 0 | 1  | 2  | 6  | 3  |
| cDNA FLJ57801, highly similar to Homo sapiens AHNAK nucleoprotein (desmoyokin) (AHNAK), transcript variant 1, mRNA (Fragment) OS=Homo sapiens PE=2 SV=1     |               | 114 kDa | 0.032   | 5.1 | 0 | 1  | 1  | 5  | 4  |
| Cellular retinoic acid-binding protein 2 (Fragment) OS=Homo sapiens GN=CRABP2 PE=1 SV=1                                                                     | CRABP2        | 9 kDa   | 0.23    | 0.6 | 0 | 4  | 4  | 1  | 3  |
| cDNA, FLJ94534, highly similar to Homo sapiens capping protein (actin filament), gelsolin-like(CAPG), mRNA OS=Homo sapiens PE=2 SV=1                        |               | 38 kDa  | 0.002   | 0.2 | 0 | 5  | 5  | 1  | 1  |
| cDNA, FLJ94267, highly similar to Homo sapiens glutathione S-transferase omega 1 (GSTO1), mRNA OS=Homo sapiens PE=2 SV=1                                    |               | 28 kDa  | 0.029   | 0.1 | 0 | 4  | 4  | 1  | 0  |
| Histone H3 OS=Homo sapiens GN=HIST2H3P52 PE=1 SV=1                                                                                                          | HIST2H3P52    | 15 kDa  | 0.14    | 0.3 | 0 | 9  | 7  | 0  | 4  |
| cDNA FLJ56108, highly similar to Puromycin-sensitive aminopeptidase (EC 3.4.11.-) OS=Homo sapiens PE=2 SV=1                                                 |               | 93 kDa  | 0.046   | 0.1 | 0 | 5  | 4  | 1  | 0  |
| FBL protein (Fragment) OS=Homo sapiens GN=FBL PE=2 SV=2                                                                                                     | FBL           | 28 kDa  | 0.043   | 0.1 | 0 | 5  | 4  | 0  | 1  |
| 40S ribosomal protein S9 OS=Homo sapiens GN=RPS9 PE=1 SV=1                                                                                                  | RPS9          | 23 kDa  | 0.0011  | 0   | 0 | 4  | 4  | 0  | 0  |
| Poly (ADP-ribose) polymerase OS=Homo sapiens GN=PARP1 PE=4 SV=1                                                                                             | PARP1         | 113 kDa | 0.0033  | 0   | 0 | 5  | 6  | 0  | 0  |
| Procollagen C-endopeptidase enhancer OS=Homo sapiens GN=PCOLCE PE=4 SV=1                                                                                    | PCOLCE        | 48 kDa  | 0.026   | INF | 0 | 4  | 0  | 4  | 6  |
| cDNA FLJ78586, highly similar to Homo sapiens VAMP (vesicle-associated membrane protein)-associated protein A, 33kDa (VAPA), mRNA OS=Homo sapiens PE=2 SV=1 |               | 27 kDa  | 0.015   | 0   | 0 | 6  | 5  | 0  | 0  |
| Interferon-induced GTP-binding protein Mx1 OS=Homo sapiens GN=MX1 PE=1 SV=1                                                                                 | MX1           | 73 kDa  | 0.013   | INF | 0 | 0  | 0  | 7  | 6  |
| Peroxidase homolog (Fragment) OS=Homo sapiens GN=PXDN PE=1 SV=1                                                                                             | PXDN          | 80 kDa  | 0.017   | INF | 0 | 0  | 0  | 5  | 7  |
| Myosin regulatory light chain 12A OS=Homo sapiens GN=MYL12A PE=1 SV=1                                                                                       | MYL12A        | 20 kDa  | 0.071   | 0   | 0 | 5  | 3  | 0  | 0  |
| Proliferating cell nuclear antigen (Fragment) OS=Homo sapiens GN=PCNA PE=2 SV=1                                                                             | PCNA          | 29 kDa  | 0.015   | 0   | 0 | 6  | 5  | 0  | 0  |
| Glycylpeptide N-tetradecanoyltransferase (Fragment) OS=Homo sapiens GN=NMT1 PE=2 SV=2                                                                       | NMT1          | 57 kDa  | 0.02    | 0   | 0 | 5  | 4  | 0  | 0  |
| Serine/arginine-rich-splicing factor 1 OS=Homo sapiens GN=SRSF1 PE=1 SV=1                                                                                   | SRSF1         | 28 kDa  | 0.071   | 0   | 0 | 5  | 3  | 0  | 0  |
| Actin-related protein 2/3 complex subunit 3 OS=Homo sapiens PE=2 SV=1                                                                                       |               | 21 kDa  | 0.0011  | 0   | 0 | 4  | 4  | 0  | 0  |
| cDNA FLJ35987 fis, clone TEST12014269, highly similar to D-3-phosphoglycerate dehydrogenase (EC 1.1.1.95) OS=Homo sapiens PE=2 SV=1                         |               | 53 kDa  | 0.74    | 1.1 | 0 | 3  | 2  | 2  | 3  |
| Proteasome subunit beta type OS=Homo sapiens PE=2 SV=1                                                                                                      |               | 29 kDa  | 0.74    | 1.1 | 0 | 3  | 2  | 2  | 3  |
| ATP-dependent RNA helicase DDX3X OS=Homo sapiens GN=DDX3X PE=1 SV=1                                                                                         | DDX3X         | 81 kDa  | 0.34    | 1.4 | 0 | 2  | 2  | 3  | 2  |
| Truncated plakophilin-2 OS=Homo sapiens GN=PKP2 PE=1 SV=1                                                                                                   | PKP2          | 91 kDa  | 0.55    | 1.3 | 0 | 3  | 2  | 2  | 3  |
| Ubiquitin-conjugating enzyme E2D 3 (UBC4/5 homolog, yeast), isoform CRA_a OS=Homo sapiens GN=UBE2D3 PE=3 SV=1                                               | UBE2D3        | 17 kDa  | 0.7     | 1.1 | 0 | 2  | 3  | 3  | 2  |
| ATP-dependent 6-phosphofructokinase, platelet type (Fragment) OS=Homo sapiens GN=PFKP PE=1 SV=1                                                             | PFKP          | 23 kDa  | 0.75    | 1.1 | 0 | 3  | 2  | 3  | 2  |
| Annexin (Fragment) OS=Homo sapiens GN=ANXA6 PE=2 SV=1                                                                                                       | ANXA6         | 75 kDa  | 0.00056 | 0.3 | 0 | 59 | 63 | 15 | 18 |
| Junctional adhesion molecule A OS=Homo sapiens GN=F11R PE=1 SV=1                                                                                            | F11R          | 30 kDa  | 0.16    | 0.7 | 0 | 8  | 11 | 6  | 6  |
| cDNA FLJ51818, highly similar to Phosphoglucomutase-1 (EC 5.4.2.2) OS=Homo sapiens PE=2 SV=1                                                                |               | 59 kDa  | 0.83    | 0.9 | 0 | 2  | 3  | 1  | 3  |
| Serine/threonine-protein phosphatase OS=Homo sapiens PE=2 SV=1                                                                                              |               | 36 kDa  | 0.32    | 0.6 | 0 | 3  | 5  | 1  | 3  |
| Aldo-keto reductase family 1 member C3 OS=Homo sapiens GN=AKR1C3 PE=1 SV=1                                                                                  | AKR1C3        | 37 kDa  | 0.18    | 0.4 | 0 | 2  | 4  | 1  | 1  |
| Tumor rejection antigen (Gp96) 1 OS=Homo sapiens GN=TRA1 PE=2 SV=1                                                                                          | TRA1          | 92 kDa  | 0.33    | 0.6 | 0 | 2  | 4  | 1  | 2  |
| Calpain small subunit 1 OS=Homo sapiens GN=CAPNS1 PE=1 SV=1                                                                                                 | CAPNS1        | 34 kDa  | 0.011   | 1.7 | 0 | 2  | 2  | 3  | 3  |
| Amino acid transporter OS=Homo sapiens PE=2 SV=1                                                                                                            |               | 56 kDa  | 0.53    | 1.9 | 0 | 1  | 2  | 4  | 1  |
| Interferon-induced GTP-binding protein Mx1 (Fragment) OS=Homo sapiens GN=MX1 PE=1 SV=1                                                                      | MX1           | 21 kDa  | 0.11    | 2.8 | 0 | 2  | 2  | 6  | 4  |
| Heterogeneous nuclear ribonucleoprotein U-like 1, isoform CRA_a OS=Homo sapiens GN=HNRPUL1 PE=4 SV=1                                                        | HNRPUL1       | 85 kDa  | 0.18    | 0.5 | 0 | 4  | 3  | 2  | 1  |
| cDNA FLJ90427 fis, clone NT2RP3000481, highly similar to Importin-7 OS=Homo sapiens PE=2 SV=1                                                               |               | 83 kDa  | 0.7     | 1.1 | 0 | 2  | 3  | 3  | 2  |
| cDNA FLJ44621 fis, clone BRACE2016896, highly similar to Lysyl-tRNA synthetase (EC 6.1.1.6) OS=Homo sapiens PE=2 SV=1                                       |               | 48 kDa  | 0.12    | 0.3 | 0 | 5  | 3  | 1  | 1  |
| Pro-cathepsin H OS=Homo sapiens GN=CTSH PE=1 SV=1                                                                                                           | CTSH          | 36 kDa  | 0.45    | 0.4 | 0 | 5  | 1  | 1  | 1  |
| CUB domain containing protein 1 (Fragment) OS=Homo sapiens PE=2 SV=1                                                                                        |               | 72 kDa  | 0.66    | 0.7 | 0 | 1  | 4  | 1  | 2  |
| S-methyl-5'-thioadenosine phosphorylase OS=Homo sapiens GN=MTAP-ANRIL fusion PE=2 SV=1                                                                      | MTAP-ANRIL    | 30 kDa  | 0.23    | 0.4 | 0 | 4  | 2  | 1  | 1  |
| Cytoplasmic dynein 1 heavy chain 1 (Fragment) OS=Homo sapiens GN=DYNC1H1 PE=1 SV=1                                                                          | DYNC1H1       | 21 kDa  | 0.13    | 4.1 | 0 | 0  | 2  | 4  | 3  |
| Solute carrier family 38, member 2, isoform CRA_b OS=Homo sapiens GN=SLC38A2 PE=4 SV=1                                                                      | SLC38A2       | 56 kDa  | 0.033   | 8.1 | 0 | 0  | 1  | 3  | 4  |
| cDNA FLJ76855, highly similar to Homo sapiens exportin 7 (XPO7), mRNA OS=Homo sapiens PE=2 SV=1                                                             |               | 124 kDa | 0.15    | 0.1 | 0 | 6  | 3  | 1  | 0  |
| FARSB protein (Fragment) OS=Homo sapiens GN=FARSB PE=2 SV=2                                                                                                 | FARSB         | 66 kDa  | 0.075   | 0.2 | 0 | 4  | 3  | 1  | 0  |
| Actin-like 6A isoform 1 variant (Fragment) OS=Homo sapiens PE=2 SV=1                                                                                        |               | 47 kDa  | 0.2     | 0.2 | 0 | 2  | 5  | 1  | 0  |
| Putative uncharacterized protein DKFZp686M1483 (Fragment) OS=Homo sapiens GN=DKFZp686M1483 PE=2 SV=1                                                        | DKFZp686M1483 | 33 kDa  | 0.17    | 12  | 0 | 0  | 1  | 6  | 3  |
| F-actin-capping protein subunit beta OS=Homo sapiens GN=CAPZB PE=1 SV=1                                                                                     | CAPZB         | 29 kDa  | 0.19    | 0.2 | 0 | 2  | 5  | 0  | 1  |
| cDNA FLJ75877, highly similar to Homo sapiens 5'-nucleotidase, cytosolic II (NT5C2), mRNA OS=Homo sapiens PE=2 SV=1                                         |               | 65 kDa  | 0.11    | 0.1 | 0 | 3  | 6  | 0  | 1  |
| Nicotinate phosphoribosyltransferase OS=Homo sapiens GN=NAPRT PE=1 SV=1                                                                                     | NAPRT         | 62 kDa  | 0.03    | 0.1 | 0 | 6  | 5  | 0  | 1  |

|                                                                                                                                  |                |         |        |     |                                 |    |    |    |     |
|----------------------------------------------------------------------------------------------------------------------------------|----------------|---------|--------|-----|---------------------------------|----|----|----|-----|
| Testis tissue sperm-binding protein Li 44a OS=Homo sapiens GN=WDR77 PE=2 SV=1                                                    | WDR77          | 37 kDa  | 0.11   | 0   | 0                               | 6  | 3  | 0  | 0   |
| Ribosomal protein, large, P2, isoform CRA_a OS=Homo sapiens GN=RPLP2 PE=3 SV=1                                                   | RPLP2          | 12 kDa  | 0.05   | 0   | Fibro-BKO low, Fibro-Naive high | 6  | 4  | 0  | 0   |
| Putative uncharacterized protein DKFZp686D12108 (Fragment) OS=Homo sapiens GN=DKFZp686D12108 PE=2 SV=1                           | DKFZp686D12108 | 130 kDa | 0.0014 | INF | Fibro-BKO high, Fibro-Naive low | 0  | 0  | 17 | 17  |
| HCG2025883, isoform CRA_b OS=Homo sapiens GN=POLR2C PE=2 SV=1                                                                    | POLR2C         | 31 kDa  | 0.081  | 0   | 0                               | 7  | 4  | 0  | 0   |
| Complement C1s subcomponent OS=Homo sapiens GN=C1S PE=1 SV=1                                                                     | C1S            | 76 kDa  | 0.31   | INF | 0                               | 0  | 0  | 1  | 7   |
| Annexin OS=Homo sapiens PE=2 SV=1                                                                                                |                | 40 kDa  | 0.12   | 1.8 | 0                               | 8  | 5  | 11 | 10  |
| Tubulin beta chain OS=Homo sapiens PE=2 SV=1                                                                                     |                | 50 kDa  | 0.28   | 0.8 | 0                               | 71 | 55 | 38 | 47  |
| Alpha-1,4 glucan phosphorylase OS=Homo sapiens PE=2 SV=1                                                                         |                | 86 kDa  | 0.0043 | 0.4 | Fibro-BKO low, Fibro-Naive high | 67 | 66 | 21 | 22  |
| UDP-glucose 6-dehydrogenase (Fragment) OS=Homo sapiens GN=UGDH PE=1 SV=1                                                         | UGDH           | 14 kDa  | 0.7    | 1.1 | 0                               | 2  | 3  | 3  | 2   |
| Transmembrane BAX inhibitor motif containing 1, isoform CRA_a OS=Homo sapiens GN=TMBIM1 PE=3 SV=1                                | TMBIM1         | 35 kDa  | 0.31   | 1.7 | 0                               | 2  | 2  | 2  | 4   |
| Secretory carrier-associated membrane protein OS=Homo sapiens PE=2 SV=1                                                          |                | 37 kDa  | 0.03   | 0.8 | Fibro-BKO low, Fibro-Naive high | 3  | 3  | 2  | 2   |
| Solute carrier family 7 (Cationic amino acid transporter, y+ system), member 1, isoform CRA_a OS=Homo sapiens GN=SLC7A1          | SLC7A1         | 68 kDa  | 0.34   | 1.4 | 0                               | 2  | 2  | 3  | 2   |
| Syndecan binding protein (Syntenin), isoform CRA_a OS=Homo sapiens GN=SDCBP PE=1 SV=1                                            | SDCBP          | 35 kDa  | 0.006  | 1.3 | Fibro-BKO high, Fibro-Naive low | 84 | 88 | 97 | 100 |
| 6-phosphogluconate dehydrogenase, decarboxylating OS=Homo sapiens PE=2 SV=1                                                      |                | 51 kDa  | 0.27   | 0.4 | 0                               | 4  | 9  | 3  | 2   |
| 6-phosphogluconate dehydrogenase, decarboxylating OS=Homo sapiens PE=2 SV=1                                                      |                | 47 kDa  | 0.073  | 0.4 | 0                               | 6  | 9  | 2  | 3   |
| Beta globin (Fragment) OS=Homo sapiens PE=3 SV=1                                                                                 |                | 11 kDa  | 0.58   | 0.7 | 0                               | 5  | 3  | 1  | 4   |
| cDNA FLJ58636, moderately similar to Atlastin OS=Homo sapiens PE=2 SV=1                                                          |                | 59 kDa  | 0.53   | 1.4 | 0                               | 1  | 3  | 3  | 2   |
| Solute carrier family 16 (Monocarboxylic acid transporters), member 3, isoform CRA_a OS=Homo sapiens GN=SLC16A3                  | SLC16A3        | 49 kDa  | 0.83   | 0.9 | 0                               | 2  | 3  | 1  | 3   |
| Coronin OS=Homo sapiens GN=CORO1B PE=3 SV=1                                                                                      | CORO1B         | 54 kDa  | 0.66   | 0.7 | 0                               | 1  | 4  | 1  | 2   |
| Sodium/potassium-transporting ATPase subunit beta-3 (Fragment) OS=Homo sapiens GN=ATP1B3 PE=1 SV=1                               | ATP1B3         | 15 kDa  | 0.23   | 0.4 | 0                               | 4  | 2  | 1  | 1   |
| Vesicle docking protein p115, isoform CRA_a OS=Homo sapiens GN=VDP PE=4 SV=1                                                     | VDP            | 108 kDa | 0.92   | 1.1 | 0                               | 3  | 1  | 1  | 3   |
| SEC31-like 1 (S. cerevisiae), isoform CRA_d OS=Homo sapiens GN=SEC31L1 PE=4 SV=1                                                 | SEC31L1        | 133 kDa | 0.89   | 1.1 | 0                               | 3  | 1  | 3  | 1   |
| cDNA FLJ56381, highly similar to Dynamin-1-like protein (EC 3.6.5.5) OS=Homo sapiens PE=2 SV=1                                   |                | 85 kDa  | 0.58   | 0.8 | 0                               | 2  | 2  | 1  | 2   |
| Beta-2-microglobulin OS=Homo sapiens PE=2 SV=1                                                                                   |                | 14 kDa  | 0.67   | 0.7 | 0                               | 4  | 1  | 2  | 1   |
| Integrin-linked protein kinase OS=Homo sapiens GN=ILK PE=1 SV=1                                                                  | ILK            | 55 kDa  | 0.39   | 3.3 | 0                               | 1  | 1  | 1  | 5   |
| 40S ribosomal protein S3a OS=Homo sapiens GN=RPS3A PE=2 SV=1                                                                     | RPS3A          | 30 kDa  | 0.082  | 0.3 | 0                               | 3  | 5  | 1  | 1   |
| Coatomer subunit beta' (Fragment) OS=Homo sapiens GN=COPB2 PE=1 SV=1                                                             | COPB2          | 20 kDa  | 0.18   | 0.5 | 0                               | 3  | 3  | 2  | 1   |
| cDNA FLJ52703, highly similar to Asparaginyl-tRNA synthetase, cytoplasmic (EC6.1.1.22) OS=Homo sapiens PE=2 SV=1                 |                | 35 kDa  | 0.1    | 0.5 | 0                               | 3  | 4  | 1  | 2   |
| Apolipoprotein E isoform 4 (Fragment) OS=Homo sapiens GN=APOE PE=2 SV=1                                                          | APOE           | 15 kDa  | 0.14   | 3.3 | 0                               | 1  | 1  | 2  | 4   |
| Pyridoxal kinase OS=Homo sapiens GN=PDXX PE=1 SV=1                                                                               | PDXX           | 31 kDa  | 0.38   | 0.6 | 0                               | 4  | 2  | 1  | 2   |
| Adenylosuccinate synthetase isozyme 2 OS=Homo sapiens GN=ADSS PE=3 SV=1                                                          | ADSS           | 50 kDa  | 0.025  | 0.3 | Fibro-BKO low, Fibro-Naive high | 3  | 4  | 1  | 1   |
| Lactadherin OS=Homo sapiens GN=MFGE8 PE=1 SV=1                                                                                   | MFGE8          | 38 kDa  | 0.0028 | 6.9 | Fibro-BKO high, Fibro-Naive low | 10 | 11 | 64 | 64  |
| Carbonyl reductase [NADPH] 1 OS=Homo sapiens GN=CBR1 PE=1 SV=1                                                                   | CBR1           | 24 kDa  | 0.22   | 0.3 | 0                               | 4  | 3  | 2  | 0   |
| Large neutral amino acids transporter 1 (Fragment) OS=Homo sapiens GN=SLC7A5 PE=4 SV=1                                           | SLC7A5         | 7 kDa   | 0.38   | 0.5 | 0                               | 3  | 4  | 0  | 3   |
| Alpha-2-antiplasmin OS=Homo sapiens GN=SERPINF2 PE=1 SV=1                                                                        | SERPINF2       | 48 kDa  | 0.036  | 7.6 | Fibro-BKO high, Fibro-Naive low | 1  | 0  | 3  | 4   |
| Neurofibromin (Fragment) OS=Homo sapiens GN=NF1 PE=1 SV=1                                                                        | NF1            | 281 kDa | 0.26   | 3.5 | 0                               | 0  | 2  | 4  | 2   |
| Tight junction protein 2 (Zona occludens 2), isoform CRA_a OS=Homo sapiens GN=TJP2 PE=4 SV=1                                     | TJP2           | 134 kDa | 0.94   | 1.1 | 0                               | 1  | 2  | 0  | 3   |
| cDNA FLJ55635, highly similar to pre-mRNA-splicing factorATP-dependent RNA helicase DHX15 (EC 3.6.1.-) OS=Homo sapiens PE=2 SV=1 |                | 90 kDa  | 0.13   | 0.2 | 0                               | 3  | 2  | 0  | 1   |
| Aflatoxin B1 aldehyde reductase member 2 (Fragment) OS=Homo sapiens GN=AKR7A2 PE=1 SV=1                                          | AKR7A2         | 35 kDa  | 0.029  | 0.1 | Fibro-BKO low, Fibro-Naive high | 4  | 4  | 1  | 0   |
| cDNA, FLJ79540, highly similar to Serine-threonine kinase receptor-associatedprotein OS=Homo sapiens PE=2 SV=1                   |                | 29 kDa  | 0.025  | 0.1 | Fibro-BKO low, Fibro-Naive high | 4  | 4  | 0  | 1   |
| Plexin-B2 (Fragment) OS=Homo sapiens GN=PLXNB2 PE=1 SV=1                                                                         | PLXNB2         | 52 kDa  | 0.48   | 2.4 | 0                               | 0  | 2  | 3  | 1   |
| N-alpha-acetyltransferase 15, NaaA auxiliary subunit OS=Homo sapiens GN=NAA15 PE=1 SV=1                                          | NAA15          | 101 kDa | 0.12   | 0.2 | 0                               | 2  | 3  | 1  | 0   |
| Casein kinase II subunit beta OS=Homo sapiens GN=CSNK2B PE=2 SV=1                                                                | CSNK2B         | 25 kDa  | 0.046  | 0.1 | Fibro-BKO low, Fibro-Naive high | 5  | 4  | 1  | 0   |
| Collagen alpha-2(VI) chain (Fragment) OS=Homo sapiens GN=COL6A2 PE=1 SV=1                                                        | COL6A2         | 20 kDa  | 0.021  | INF | Fibro-BKO high, Fibro-Naive low | 0  | 0  | 5  | 4   |
| Quinone oxidoreductase (Fragment) OS=Homo sapiens GN=CRYZ PE=1 SV=1                                                              | CRYZ           | 26 kDa  | 0.071  | 0   | 0                               | 5  | 3  | 0  | 0   |
| MHC class I antigen OS=Homo sapiens GN=HLA-A PE=3 SV=1                                                                           | HLA-A          | 41 kDa  | 0.1    | 0.6 | 0                               | 11 | 14 | 5  | 8   |
| Tumor susceptibility gene 101 protein OS=Homo sapiens GN=TSG101 PE=1 SV=1                                                        | TSG101         | 41 kDa  | 0.47   | 0.9 | 0                               | 5  | 6  | 4  | 5   |
| Afadin OS=Homo sapiens GN=AFDN PE=1 SV=2                                                                                         | AFDN           | 202 kDa | 0.23   | 1.4 | 0                               | 2  | 2  | 2  | 3   |
| HCG2043376, isoform CRA_b OS=Homo sapiens GN=hCG_2043376 PE=4 SV=1                                                               | hCG_2043376    | 22 kDa  | 0.42   | 0.7 | 0                               | 11 | 6  | 4  | 6   |
| Plectin 1, intermediate filament binding protein 500kDa, isoform CRA_b OS=Homo sapiens GN=PLEC1 PE=4 SV=1                        | PLEC1          | 234 kDa | 0.14   | 1.1 | 0                               | 2  | 2  | 2  | 2   |
| Heterogeneous nuclear ribonucleoprotein H OS=Homo sapiens GN=HNRNPH1 PE=1 SV=1                                                   | HNRNPH1        | 47 kDa  | 0.51   | 0.9 | 0                               | 5  | 7  | 5  | 4   |
| cDNA FLJ61453, highly similar to Adapter-relatedprotein complex 2 alpha-1 subunit OS=Homo sapiens PE=2 SV=1                      |                | 55 kDa  | 0.39   | 0.7 | 0                               | 3  | 2  | 1  | 2   |
| Putative uncharacterized protein DKFZp434M052 (Fragment) OS=Homo sapiens GN=DKFZp434M052 PE=2 SV=1                               | DKFZp434M052   | 16 kDa  | 0.43   | 0.7 | 0                               | 5  | 4  | 2  | 4   |
| FASN protein (Fragment) OS=Homo sapiens GN=FASN PE=2 SV=1                                                                        | FASN           | 84 kDa  | 0.35   | 1.3 | 0                               | 22 | 37 | 34 | 34  |
| RAB8A, member RAS oncogene family, isoform CRA_a OS=Homo sapiens GN=RAB8A PE=4 SV=1                                              | RAB8A          | 24 kDa  | 0.13   | 0.7 | 0                               | 4  | 4  | 2  | 3   |
| Lymphocyte antigen 75 variant (Fragment) OS=Homo sapiens PE=2 SV=1                                                               |                | 155 kDa | 0.33   | 0.6 | 0                               | 2  | 4  | 1  | 2   |
| Alanine-tRNA ligase, cytoplasmic (Fragment) OS=Homo sapiens GN=AARS PE=1 SV=3                                                    | AARS           | 30 kDa  | 0.12   | 0.6 | 0                               | 3  | 3  | 1  | 2   |
| Eukaryotic translation initiation factor 3 subunit B OS=Homo sapiens GN=EIF3S9 PE=3 SV=1                                         | EIF3S9         | 92 kDa  | 0.23   | 0.4 | 0                               | 4  | 2  | 1  | 1   |
| Nectin-2 (Fragment) OS=Homo sapiens GN=NECTIN2 PE=1 SV=1                                                                         | NECTIN2        | 23 kDa  | 0.081  | 2.2 | 0                               | 2  | 1  | 3  | 3   |

|                                                                                                                                             |            |         |         |     |                                 |    |    |    |    |
|---------------------------------------------------------------------------------------------------------------------------------------------|------------|---------|---------|-----|---------------------------------|----|----|----|----|
| KRT8 protein (Fragment) OS=Homo sapiens GN=KRT8 PE=2 SV=2                                                                                   | KRT8       | 41 kDa  | 0.059   | 0.3 | 0                               | 13 | 10 | 3  | 4  |
| cDNA FLJ76813, highly similar to Homo sapiens acetyl-Coenzyme A acetyltransferase 2 (acetoacetyl Coenzyme A thiolase), mRNA OS=Homo sapiens |            | 41 kDa  | 0.32    | 1.5 | 0                               | 2  | 1  | 2  | 2  |
| Hunc18b2 OS=Homo sapiens PE=2 SV=1                                                                                                          |            | 65 kDa  | 0.18    | 0.6 | 0                               | 3  | 3  | 2  | 1  |
| Tight junction protein ZO-1 OS=Homo sapiens GN=TJP1 PE=1 SV=1                                                                               | TJP1       | 188 kDa | 0.88    | 1.1 | 0                               | 1  | 3  | 1  | 3  |
| GIPC PDZ domain containing family, member 1, isoform CRA_a OS=Homo sapiens GN=GIPC1 PE=4 SV=1                                               | GIPC1      | 36 kDa  | 0.053   | 4   | 0                               | 1  | 1  | 4  | 3  |
| Transmembrane 9 superfamily member OS=Homo sapiens GN=TM9SF2 PE=2 SV=1                                                                      | TM9SF2     | 76 kDa  | 0.86    | 1.1 | 0                               | 3  | 1  | 2  | 2  |
| Epiplakin OS=Homo sapiens GN=EPPK1 PE=1 SV=2                                                                                                | EPPK1      | 553 kDa | 0.43    | 2   | 0                               | 1  | 3  | 5  | 2  |
| Leucine rich repeat containing 54, isoform CRA_a OS=Homo sapiens GN=LRRCS4 PE=4 SV=1                                                        | LRRCS4     | 38 kDa  | 0.061   | 0.3 | 0                               | 4  | 3  | 1  | 1  |
| cDNA, FLJ94921, highly similar to Homo sapiens prolyl endopeptidase (PREP), mRNA OS=Homo sapiens PE=2 SV=1                                  |            | 81 kDa  | 0.18    | 0.4 | 0                               | 2  | 4  | 1  | 1  |
| Polypyrimidine tract-binding protein 1 OS=Homo sapiens GN=PTBP1 PE=1 SV=1                                                                   | PTBP1      | 62 kDa  | 0.061   | 0.3 | 0                               | 4  | 3  | 1  | 1  |
| Testicular tissue protein Li 183 OS=Homo sapiens PE=2 SV=1                                                                                  |            | 22 kDa  | 0.18    | 0.6 | 0                               | 3  | 3  | 2  | 1  |
| Ribosomal protein L23, isoform CRA_b OS=Homo sapiens GN=RPL23 PE=3 SV=1                                                                     | RPL23      | 15 kDa  | 0.41    | 0.6 | 0                               | 4  | 2  | 2  | 1  |
| Synaptogyrin OS=Homo sapiens GN=SYNGR2 PE=3 SV=1                                                                                            | SYNGR2     | 25 kDa  | 0.0082  | 0.6 | Fibro-BKO low, Fibro-Naive high | 2  | 2  | 1  | 1  |
| Transmembrane 9 superfamily member OS=Homo sapiens PE=2 SV=1                                                                                |            | 75 kDa  | 0.23    | 1.5 | 0                               | 1  | 2  | 2  | 2  |
| cDNA FLJ58258, highly similar to Cyclin G-associated kinase (EC 2.7.11.1) OS=Homo sapiens PE=2 SV=1                                         |            | 132 kDa | 0.7     | 0.9 | 0                               | 3  | 2  | 2  | 2  |
| Toll interacting protein variant (Fragment) OS=Homo sapiens PE=2 SV=1                                                                       |            | 39 kDa  | 0.14    | 3.3 | 0                               | 1  | 1  | 2  | 4  |
| cDNA FLJ76064 OS=Homo sapiens PE=2 SV=1                                                                                                     |            | 35 kDa  | 0.0034  | 0.4 | Fibro-BKO low, Fibro-Naive high | 3  | 3  | 1  | 1  |
| U2 small nuclear RNA auxiliary factor 1 isoform a OS=Homo sapiens GN=U2AF1 PE=2 SV=1                                                        | U2AF1      | 28 kDa  | 0.46    | 0.4 | 0                               | 4  | 1  | 1  | 1  |
| Nucleosome assembly protein 1-like 4, isoform CRA_b OS=Homo sapiens GN=NAP1L4 PE=3 SV=1                                                     | NAP1L4     | 43 kDa  | 0.55    | 0.6 | 0                               | 2  | 5  | 1  | 3  |
| Elongation factor 1-delta OS=Homo sapiens GN=EEF1D PE=1 SV=1                                                                                | EEF1D      | 69 kDa  | 0.22    | 0.3 | 0                               | 4  | 3  | 2  | 0  |
| Epididymis secretory protein Li 71 OS=Homo sapiens GN=HEL-S-71 PE=2 SV=1                                                                    | HEL-S-71   | 17 kDa  | 0.37    | 0.4 | 0                               | 3  | 2  | 0  | 2  |
| Transmembrane protein 2, isoform CRA_b OS=Homo sapiens GN=TMEM2 PE=4 SV=1                                                                   | TMEM2      | 154 kDa | 0.23    | 2.9 | 0                               | 0  | 2  | 2  | 3  |
| Na(+)/H(+) exchange regulatory cofactor NHE-RF OS=Homo sapiens PE=2 SV=1                                                                    |            | 39 kDa  | 0.17    | 0.3 | 0                               | 3  | 4  | 0  | 2  |
| cDNA, FLJ94229, highly similar to Homo sapiens heterogeneous nuclear ribonucleoprotein L (HNRPL), mRNA OS=Homo sapiens PE=2 SV=1            |            | 60 kDa  | 0.22    | 0.4 | 0                               | 3  | 3  | 0  | 2  |
| Ubiquitin carboxyl-terminal hydrolase OS=Homo sapiens PE=2 SV=1                                                                             |            | 26 kDa  | 0.19    | 0.3 | 0                               | 4  | 3  | 0  | 2  |
| NPD011 OS=Homo sapiens GN=NPD011 PE=2 SV=1                                                                                                  | NPD011     | 24 kDa  | 0.34    | 0.3 | 0                               | 1  | 3  | 1  | 0  |
| Vitamin D-binding protein OS=Homo sapiens GN=GC PE=1 SV=1                                                                                   | GC         | 39 kDa  | 0.018   | 8.7 | Fibro-BKO high, Fibro-Naive low | 1  | 0  | 4  | 4  |
| Epidermal growth factor receptor kinase substrate 8-like protein 1 OS=Homo sapiens GN=EPS8L1 PE=1 SV=1                                      | EPS8L1     | 73 kDa  | 0.51    | 0.4 | 0                               | 1  | 5  | 2  | 0  |
| Uncharacterized protein (Fragment) OS=Homo sapiens PE=4 SV=2                                                                                |            | 27 kDa  | 0.053   | 0.2 | 0                               | 3  | 4  | 1  | 0  |
| Transaldolase OS=Homo sapiens PE=2 SV=1                                                                                                     |            | 38 kDa  | 0.025   | 0.1 | Fibro-BKO low, Fibro-Naive high | 4  | 4  | 0  | 1  |
| Heterogeneous nuclear ribonucleoprotein D (AU-rich element RNA binding protein 1, 37kDa), isoform CRA_c OS=Homo sapiens                     | HNRPD      | 36 kDa  | 0.14    | 0.2 | 0                               | 3  | 2  | 1  | 0  |
| DNA-directed RNA polymerases I, II, and III subunit RPABC3 (Fragment) OS=Homo sapiens GN=POLR2H PE=1 SV=8                                   | POLR2H     | 17 kDa  | 0.069   | 0.2 | 0                               | 4  | 3  | 0  | 1  |
| Eukaryotic translation initiation factor 5A (Fragment) OS=Homo sapiens GN=EIF5A PE=1 SV=8                                                   | EIF5A      | 16 kDa  | 0.081   | 0   | 0                               | 2  | 4  | 0  | 0  |
| Actin-like protein (Fragment) OS=Homo sapiens GN=ACT PE=4 SV=1                                                                              | ACT        | 11 kDa  | 0.35    | 0.5 | 0                               | 6  | 6  | 0  | 5  |
| Tenascin C (Hexabrachion), isoform CRA_a OS=Homo sapiens GN=TNC PE=4 SV=1                                                                   | TNC        | 241 kDa | 0.00028 | INF | Fibro-BKO high, Fibro-Naive low | 0  | 0  | 44 | 49 |
| Tubulin gamma chain OS=Homo sapiens GN=TUBG2 PE=2 SV=1                                                                                      | TUBG2      | 52 kDa  | 0.03    | 0   | Fibro-BKO low, Fibro-Naive high | 4  | 3  | 0  | 0  |
| ATP synthase subunit alpha OS=Homo sapiens GN=HEL-S-123m PE=2 SV=1                                                                          | HEL-S-123m | 60 kDa  | 0.0011  | 0   | Fibro-BKO low, Fibro-Naive high | 4  | 4  | 0  | 0  |
| Tenascin OS=Homo sapiens GN=TNC PE=1 SV=1                                                                                                   | TNC        | 221 kDa | 0.00024 | INF | Fibro-BKO high, Fibro-Naive low | 0  | 0  | 45 | 50 |
| Malate dehydrogenase OS=Homo sapiens GN=HEL-S-32 PE=2 SV=1                                                                                  | HEL-S-32   | 36 kDa  | 0.012   | 0   | Fibro-BKO low, Fibro-Naive high | 3  | 4  | 0  | 0  |
| cDNA, FLJ93750, Homo sapiens DEAD (Asp-Glu-Ala-Asp) box polypeptide 6 (DDX6), mRNA OS=Homo sapiens PE=2 SV=1                                |            | 53 kDa  | 0.17    | 0   | 0                               | 2  | 6  | 0  | 0  |
| Serpin peptidase inhibitor, clade B (Ovalbumin), member 6, isoform CRA_a OS=Homo sapiens GN=SERPINB6 PE=3 SV=1                              | SERPINB6   | 43 kDa  | 0.0011  | 0   | Fibro-BKO low, Fibro-Naive high | 3  | 3  | 0  | 0  |
| Complement component 1, q subcomponent, B chain, isoform CRA_a OS=Homo sapiens GN=C1QB PE=4 SV=1                                            | C1QB       | 27 kDa  | 0.13    | INF | 0                               | 0  | 0  | 2  | 5  |
| Proliferation-associated 2G4, 38kDa, isoform CRA_a OS=Homo sapiens GN=PA2G4 PE=4 SV=1                                                       | PA2G4      | 44 kDa  | 0.11    | 0   | 0                               | 4  | 2  | 0  | 0  |
| Ribosomal protein L4 variant (Fragment) OS=Homo sapiens PE=2 SV=1                                                                           |            | 49 kDa  | 0.037   | 0.4 | Fibro-BKO low, Fibro-Naive high | 16 | 15 | 7  | 5  |
| Filamin B, beta (Actin binding protein 278), isoform CRA_a OS=Homo sapiens GN=FLNB PE=4 SV=1                                                | FLNB       | 280 kDa | 0.23    | 0.3 | 0                               | 12 | 29 | 6  | 6  |
| Neutral alpha-glucosidase AB OS=Homo sapiens GN=GANAB PE=1 SV=1                                                                             | GANAB      | 97 kDa  | 0.7     | 0.8 | 0                               | 35 | 14 | 20 | 16 |
| Histone H2B OS=Homo sapiens GN=HIST1H2BJ PE=3 SV=1                                                                                          | HIST1H2BJ  | 14 kDa  | 0.17    | 0.4 | 0                               | 71 | 42 | 13 | 24 |
| cDNA FLJ51655, highly similar to Actin-like protein 2 OS=Homo sapiens PE=2 SV=1                                                             |            | 35 kDa  | 0.0034  | 0.4 | Fibro-BKO low, Fibro-Naive high | 6  | 6  | 2  | 2  |
| MYH14 protein OS=Homo sapiens GN=MYH14 PE=1 SV=1                                                                                            | MYH14      | 73 kDa  | 0.088   | 0.6 | 0                               | 3  | 4  | 2  | 2  |
| Reticulon OS=Homo sapiens GN=RTN4 PE=1 SV=1                                                                                                 | RTN4       | 37 kDa  | 0.63    | 0.8 | 0                               | 9  | 4  | 4  | 5  |
| Non-specific serine/threonine protein kinase OS=Homo sapiens PE=2 SV=1                                                                      |            | 81 kDa  | 0.18    | 1.9 | 0                               | 1  | 2  | 2  | 3  |
| Guanine nucleotide binding protein (G protein), q polypeptide, isoform CRA_c OS=Homo sapiens GN=GNAQ PE=4 SV=1                              | GNAQ       | 42 kDa  | 0.79    | 1.1 | 0                               | 1  | 3  | 2  | 2  |
| Trifunctional purine biosynthetic protein adenosine-3 OS=Homo sapiens GN=GART PE=2 SV=1                                                     | GART       | 108 kDa | 0.69    | 0.9 | 0                               | 2  | 2  | 2  | 1  |
| CTP synthase OS=Homo sapiens PE=2 SV=1                                                                                                      |            | 50 kDa  | 0.45    | 0.7 | 0                               | 3  | 2  | 2  | 1  |
| Ribosomal protein S23, isoform CRA_a OS=Homo sapiens GN=RPS23 PE=2 SV=1                                                                     | RPS23      | 16 kDa  | 0.81    | 0.8 | 0                               | 1  | 3  | 1  | 2  |
| cDNA FLJ42082 fis, clone TCRX2000171, highly similar to CLAUDIN-4 OS=Homo sapiens PE=2 SV=1                                                 |            | 21 kDa  | 0.73    | 0.9 | 0                               | 8  | 5  | 6  | 4  |
| Lactoferrin OS=Homo sapiens GN=LTF PE=2 SV=1                                                                                                | LTF        | 78 kDa  | 0.18    | 1.9 | 0                               | 1  | 2  | 2  | 3  |
| Epididymis secretory sperm binding protein Li 67p OS=Homo sapiens GN=HEL-S-67p PE=2 SV=1                                                    | HEL-S-67p  | 20 kDa  | 0.14    | 0.4 | 0                               | 3  | 2  | 1  | 1  |
| Small nuclear ribonucleoprotein 70kDa polypeptide (RNP antigen), isoform CRA_b OS=Homo sapiens GN=SNRP70 PE=4 SV=1                          | SNRP70     | 52 kDa  | 0.0034  | 0.4 | Fibro-BKO low, Fibro-Naive high | 3  | 3  | 1  | 1  |

|                                                                                                                                           |           |         |         |     |                                 |    |    |    |    |
|-------------------------------------------------------------------------------------------------------------------------------------------|-----------|---------|---------|-----|---------------------------------|----|----|----|----|
| Glycogen [starch] synthase OS=Homo sapiens PE=2 SV=1                                                                                      |           | 84 kDa  | 0.46    | 0.6 | 0                               | 1  | 3  | 1  | 1  |
| G protein-coupled receptor 56 isoform 1 OS=Homo sapiens GN=GPR56 PE=2 SV=1                                                                | GPR56     | 78 kDa  | 0.45    | 0.7 | 0                               | 3  | 2  | 2  | 1  |
| Protein S100 OS=Homo sapiens GN=HEL-S-43 PE=2 SV=1                                                                                        | HEL-S-43  | 12 kDa  | 0.23    | 0.4 | 0                               | 4  | 2  | 1  | 1  |
| Ribosomal protein L11, isoform CRA_b OS=Homo sapiens GN=RPL11 PE=2 SV=1                                                                   | RPL11     | 20 kDa  | 0.64    | 1.6 | 0                               | 2  | 0  | 1  | 2  |
| Ribosomal protein L30, isoform CRA_b OS=Homo sapiens GN=RPL30 PE=3 SV=1                                                                   | RPL30     | 13 kDa  | 0.0034  | 0.4 | Fibro-BKO low, Fibro-Naive high | 3  | 3  | 1  | 1  |
| Ribosomal protein L35, isoform CRA_a OS=Homo sapiens GN=RPL35 PE=3 SV=1                                                                   | RPL35     | 18 kDa  | 0.55    | 0.7 | 0                               | 2  | 1  | 1  | 1  |
| Growth factor receptor-bound protein 2 OS=Homo sapiens GN=GRB2 PE=2 SV=1                                                                  | GRB2      | 25 kDa  | 0.45    | 0.5 | 0                               | 1  | 2  | 1  | 1  |
| Acid phosphatase 1 isoform c variant (Fragment) OS=Homo sapiens PE=2 SV=1                                                                 |           | 19 kDa  | 0.14    | 0.4 | 0                               | 3  | 2  | 1  | 1  |
| Neural cell expressed, developmentally down-regulated 4-like, isoform CRA_b OS=Homo sapiens GN=NEDD4L PE=4 SV=1                           | NEDD4L    | 96 kDa  | 0.32    | 0.3 | 0                               | 1  | 3  | 0  | 1  |
| Ubiquitin-activating enzyme E1-like 2, isoform CRA_a OS=Homo sapiens GN=UBE1L2 PE=4 SV=1                                                  | UBE1L2    | 118 kDa | 0.45    | 3   | 0                               | 0  | 2  | 4  | 1  |
| DERP12 (Dermal papilla derived protein 12) OS=Homo sapiens GN=derp12 PE=2 SV=1                                                            | derp12    | 38 kDa  | 0.14    | 0.2 | 0                               | 3  | 2  | 1  | 0  |
| Glutathione S-transferase pi (Fragment) OS=Homo sapiens GN=GSTP1 PE=2 SV=1                                                                | GSTP1     | 17 kDa  | 0.074   | 0.4 | 0                               | 16 | 12 | 5  | 4  |
| Lin-7 homolog C variant (Fragment) OS=Homo sapiens PE=2 SV=1                                                                              |           | 22 kDa  | 0.84    | 0.8 | 0                               | 2  | 2  | 0  | 3  |
| Syndecan OS=Homo sapiens GN=SDC4 PE=2 SV=1                                                                                                | SDC4      | 14 kDa  | 0.64    | 1.6 | 0                               | 0  | 3  | 2  | 2  |
| Eukaryotic translation initiation factor 6 (Fragment) OS=Homo sapiens GN=EIF6 PE=1 SV=1                                                   | EIF6      | 12 kDa  | 0.35    | 0.4 | 0                               | 2  | 3  | 0  | 2  |
| SEC24 related gene family, member C (S. cerevisiae), isoform CRA_a OS=Homo sapiens GN=SEC24C PE=4 SV=1                                    | SEC24C    | 118 kDa | 0.12    | 0.2 | 0                               | 2  | 3  | 1  | 0  |
| Macrophage migration inhibitory factor (Fragment) OS=Homo sapiens GN=MIF PE=1 SV=1                                                        | MIF       | 12 kDa  | 0.12    | 0.2 | 0                               | 2  | 3  | 1  | 0  |
| Adaptor-related protein complex 3 beta 1 subunit isoform 2 OS=Homo sapiens GN=AP3B1 PE=2 SV=1                                             | AP3B1     | 96 kDa  | 0.14    | 0.3 | 0                               | 2  | 2  | 1  | 0  |
| Ubiquitin thioesterase OS=Homo sapiens PE=2 SV=1                                                                                          |           | 35 kDa  | 0.89    | 0.8 | 0                               | 0  | 3  | 2  | 0  |
| Prosaposin (Variant Gaucher disease and variant metachromatic leukodystrophy), isoform CRA_b OS=Homo sapiens GN=PSAP                      | PSAP      | 58 kDa  | 0.36    | 0.3 | 0                               | 3  | 1  | 1  | 0  |
| PGRMC1 protein OS=Homo sapiens GN=PGRMC1 PE=2 SV=1                                                                                        | PGRMC1    | 22 kDa  | 0.047   | 0.2 | Fibro-BKO low, Fibro-Naive high | 3  | 3  | 0  | 1  |
| Trans-Golgi network integral membrane protein 2 OS=Homo sapiens GN=TGOLN2 PE=1 SV=2                                                       | TGOLN2    | 51 kDa  | 0.15    | 0.2 | 0                               | 2  | 4  | 0  | 1  |
| cDNA FLJ75831, highly similar to Homo sapiens exportin, tRNA (nuclear export receptor for tRNAs) (XPOT), mRNA OS=Homo sapiens PE=2 SV=1   |           | 110 kDa | 0.047   | 0.2 | Fibro-BKO low, Fibro-Naive high | 3  | 3  | 0  | 1  |
| Epididymis secretory protein Li 85 OS=Homo sapiens GN=PCBP1 PE=2 SV=1                                                                     | PCBP1     | 37 kDa  | 0.11    | 0.1 | 0                               | 5  | 3  | 0  | 1  |
| Putative uncharacterized protein (Fragment) OS=Homo sapiens PE=2 SV=1                                                                     |           | 20 kDa  | 0.024   | 0   | Fibro-BKO low, Fibro-Naive high | 9  | 7  | 0  | 0  |
| Integrin, alpha 5 (Fibronectin receptor, alpha polypeptide), isoform CRA_b OS=Homo sapiens GN=ITGA5 PE=3 SV=1                             | ITGA5     | 119 kDa | 0.0014  | INF | Fibro-BKO high, Fibro-Naive low | 0  | 0  | 4  | 4  |
| cDNA FLJ34625 fis, clone KIDNE2015244, highly similar to Serine protease HTRA1 (EC 3.4.21.-) OS=Homo sapiens PE=2 SV=1                    |           | 48 kDa  | 0.031   | INF | Fibro-BKO high, Fibro-Naive low | 0  | 0  | 4  | 3  |
| Complement component 1, q subcomponent, C chain, isoform CRA_a OS=Homo sapiens GN=C1QC PE=4 SV=1                                          | C1QC      | 26 kDa  | 0.043   | INF | Fibro-BKO high, Fibro-Naive low | 0  | 0  | 3  | 5  |
| Ribosomal protein L12 variant (Fragment) OS=Homo sapiens PE=2 SV=1                                                                        |           | 21 kDa  | 0.012   | 0   | Fibro-BKO low, Fibro-Naive high | 3  | 4  | 0  | 0  |
| Actin-related protein 2 OS=Homo sapiens GN=ACTR2 PE=1 SV=1                                                                                | ACTR2     | 6 kDa   | 0.0011  | 0   | Fibro-BKO low, Fibro-Naive high | 4  | 4  | 0  | 0  |
| Cytochrome b5 type B OS=Homo sapiens GN=CYB5B PE=1 SV=1                                                                                   | CYB5B     | 16 kDa  | 0.0011  | 0   | Fibro-BKO low, Fibro-Naive high | 3  | 3  | 0  | 0  |
| Uncharacterized protein OS=Homo sapiens PE=1 SV=1                                                                                         |           | 63 kDa  | 0.0011  | 0   | Fibro-BKO low, Fibro-Naive high | 2  | 2  | 0  | 0  |
| Cell migration-inducing and hyaluronan-binding protein (Fragment) OS=Homo sapiens GN=CEMIP PE=1 SV=1                                      | CEMIP     | 17 kDa  | 0.0014  | INF | Fibro-BKO high, Fibro-Naive low | 0  | 0  | 4  | 4  |
| Annexin (Fragment) OS=Homo sapiens GN=ANXA6 PE=2 SV=1                                                                                     | ANXA6     | 76 kDa  | 0.00011 | 0.3 | Fibro-BKO low, Fibro-Naive high | 57 | 61 | 16 | 18 |
| cDNA FLJ78096, highly similar to Homo sapiens actin, alpha, cardiac muscle (ACTC), mRNA OS=Homo sapiens PE=2 SV=1                         |           | 42 kDa  | 0.68    | 1.1 | 0                               | 20 | 16 | 19 | 16 |
| HLA class I histocompatibility antigen, A-3 alpha chain OS=Homo sapiens GN=HLA-A PE=1 SV=1                                                | HLA-A     | 41 kDa  | 0.72    | 0.8 | 0                               | 13 | 15 | 5  | 16 |
| cDNA, FLJ94136, highly similar to Homo sapiens synaptotagmin binding, cytoplasmic RNA interacting protein (SYNCRIP), mRNA OS=Homo sapiens |           | 70 kDa  | 0.083   | 0.5 | 0                               | 2  | 3  | 1  | 1  |
| Amine oxidase OS=Homo sapiens PE=2 SV=1                                                                                                   |           | 71 kDa  | 0.23    | 1.5 | 0                               | 1  | 2  | 2  | 2  |
| cDNA FLJ54369, highly similar to Itchy homolog E3 ubiquitin protein ligase (EC 6.3.2.-) OS=Homo sapiens PE=2 SV=1                         |           | 93 kDa  | 0.23    | 1.5 | 0                               | 1  | 2  | 2  | 2  |
| S-adenosylmethionine synthase OS=Homo sapiens PE=2 SV=1                                                                                   |           | 44 kDa  | 0.0082  | 0.6 | Fibro-BKO low, Fibro-Naive high | 2  | 2  | 1  | 1  |
| VAMP3 protein OS=Homo sapiens GN=VAMP3 PE=2 SV=1                                                                                          | VAMP3     | 11 kDa  | 0.69    | 0.9 | 0                               | 2  | 2  | 2  | 1  |
| Interferon-induced transmembrane protein 3 OS=Homo sapiens GN=IFITM3 PE=1 SV=1                                                            | IFITM3    | 12 kDa  | 0.82    | 1   | 0                               | 3  | 4  | 3  | 3  |
| HCG24487, isoform CRA_c OS=Homo sapiens GN=hCG_24487 PE=3 SV=1                                                                            | hCG_24487 | 21 kDa  | 0.31    | 1.7 | 0                               | 1  | 1  | 1  | 2  |
| cDNA, FLJ93141, highly similar to Homo sapiens coagulation factor XIII, A1 polypeptide (F13A1), mRNA OS=Homo sapiens PE=2 SV=1            |           | 83 kDa  | 0.37    | 1.7 | 0                               | 1  | 1  | 2  | 1  |
| Ras-related protein R-Ras2 (Fragment) OS=Homo sapiens GN=RRAS2 PE=1 SV=1                                                                  | RRAS2     | 20 kDa  | 0.22    | 1.8 | 0                               | 2  | 1  | 2  | 3  |
| Receptor-type tyrosine-protein phosphatase OS=Homo sapiens PE=2 SV=1                                                                      |           | 92 kDa  | 0.0082  | 0.6 | Fibro-BKO low, Fibro-Naive high | 2  | 2  | 1  | 1  |
| Glutamine-fructose-6-phosphate transaminase 2 isoform 2 (Fragment) OS=Homo sapiens GN=GFPT2 PE=2 SV=1                                     | GFPT2     | 71 kDa  | 0.083   | 0.5 | 0                               | 2  | 3  | 1  | 1  |
| Chloride intracellular channel protein OS=Homo sapiens PE=2 SV=1                                                                          |           | 28 kDa  | 0.69    | 0.9 | 0                               | 2  | 2  | 2  | 1  |
| Formyltetrahydrofolate dehydrogenase isoform a variant (Fragment) OS=Homo sapiens PE=2 SV=1                                               |           | 99 kDa  | 0.62    | 1.5 | 0                               | 2  | 1  | 3  | 1  |
| cDNA FLJ50778, highly similar to Protein flightless-1 homolog OS=Homo sapiens PE=2 SV=1                                                   |           | 141 kDa | 0.35    | 0.4 | 0                               | 1  | 2  | 1  | 0  |
| Discoidin domain receptor family, member 1, isoform CRA_b OS=Homo sapiens GN=DDR1 PE=4 SV=1                                               | DDR1      | 102 kDa | 0.37    | 1.7 | 0                               | 1  | 1  | 2  | 1  |
| cDNA FLJ60424, highly similar to Junction plakoglobin OS=Homo sapiens PE=2 SV=1                                                           |           | 63 kDa  | 0.23    | 1.3 | 0                               | 12 | 13 | 12 | 17 |
| Ras-related protein Rab-35 (Fragment) OS=Homo sapiens GN=RAB35 PE=1 SV=1                                                                  | RAB35     | 21 kDa  | 0.58    | 1.4 | 0                               | 1  | 4  | 3  | 3  |
| Misshapen/NIK-related kinase isoform 2 variant (Fragment) OS=Homo sapiens PE=2 SV=1                                                       |           | 93 kDa  | 0.59    | 1.5 | 0                               | 1  | 2  | 1  | 3  |
| 60S ribosomal protein L21 OS=Homo sapiens GN=RPL21 PE=1 SV=1                                                                              | RPL21     | 10 kDa  | 0.58    | 1.8 | 0                               | 0  | 2  | 2  | 1  |
| RAB1B protein OS=Homo sapiens GN=RAB1B PE=2 SV=1                                                                                          | RAB1B     | 22 kDa  | 0.38    | 0.5 | 0                               | 7  | 5  | 1  | 5  |
| DEAD (Asp-Glu-Ala-Asp) box polypeptide 48, isoform CRA_a OS=Homo sapiens GN=DDX48 PE=3 SV=1                                               | DDX48     | 47 kDa  | 0.11    | 2.6 | 0                               | 2  | 1  | 4  | 3  |
| POLR1C protein (Fragment) OS=Homo sapiens GN=POLR1C PE=2 SV=1                                                                             | POLR1C    | 38 kDa  | 0.14    | 0.4 | 0                               | 3  | 2  | 1  | 1  |
| Dynactin subunit 1 OS=Homo sapiens GN=DCTN1 PE=1 SV=1                                                                                     | DCTN1     | 139 kDa | 0.23    | 1.5 | 0                               | 1  | 2  | 2  | 2  |

|                                                                                                                                                                   |                |         |        |     |                                 |  |    |    |     |     |
|-------------------------------------------------------------------------------------------------------------------------------------------------------------------|----------------|---------|--------|-----|---------------------------------|--|----|----|-----|-----|
| EPH receptor B3, isoform CRA_a OS=Homo sapiens GN=EPHB3 PE=3 SV=1                                                                                                 | EPHB3          | 106 kDa | 0.92   | 1   | 0                               |  | 4  | 6  | 5   | 4   |
| Tetraspanin-15 (Fragment) OS=Homo sapiens GN=TSPAN15 PE=1 SV=1                                                                                                    | TSPAN15        | 18 kDa  | 0.37   | 1.7 | 0                               |  | 1  | 1  | 2   | 1   |
| Fibronectin (Fragment) OS=Homo sapiens GN=FN1 PE=1 SV=1                                                                                                           | FN1            | 121 kDa | 0.0012 | 52  | Fibro-BKO high, Fibro-Naive low |  | 7  | 14 | 480 | 484 |
| Sequestosome-1 OS=Homo sapiens GN=SQSTM1 PE=1 SV=1                                                                                                                | SQSTM1         | 41 kDa  | 0.49   | 0.5 | 0                               |  | 2  | 2  | 0   | 2   |
| cDNA FLJ61687, highly similar to Homo sapiens UEV and lactate/malate dehydrogenase domains (UEVLD), transcript variant 1, mRNA OS=Homo sapiens GN=UEVLD PE=1 SV=1 | UEVLD          | 37 kDa  | 0.58   | 1.7 | 0                               |  | 0  | 2  | 1   | 2   |
| cDNA FLJ10273 fis, clone HEMBB1001137, highly similar to SEC23-interacting protein OS=Homo sapiens PE=2 SV=1                                                      | SEC23IP        | 111 kDa | 0.14   | 0.3 | 0                               |  | 2  | 2  | 1   | 0   |
| NADH-cytochrome b5 reductase OS=Homo sapiens GN=CYB5R3 PE=3 SV=1                                                                                                  | CYB5R3         | 33 kDa  | 0.32   | 0.3 | 0                               |  | 1  | 3  | 0   | 1   |
| Receptor protein-tyrosine kinase OS=Homo sapiens GN=ERBB2 PE=1 SV=1                                                                                               | ERBB2          | 108 kDa | 0.033  | 6.5 | Fibro-BKO high, Fibro-Naive low |  | 1  | 0  | 3   | 3   |
| cDNA FLJ56531, highly similar to UV excision repair protein RAD23 homolog B OS=Homo sapiens PE=2 SV=1                                                             | RAD23B         | 42 kDa  | 0.033  | 6.5 | Fibro-BKO high, Fibro-Naive low |  | 1  | 0  | 3   | 3   |
| cDNA FLJ75154, highly similar to Homo sapiens heterogeneous nuclear ribonucleoprotein C (C1/C2), mRNA OS=Homo sapiens GN=HNRNCC1 PE=2 SV=1                        | HNRNCC1        | 34 kDa  | 0.14   | 0.2 | 0                               |  | 3  | 2  | 1   | 0   |
| M6PR protein OS=Homo sapiens GN=M6PR PE=2 SV=1                                                                                                                    | M6PR           | 31 kDa  | 0.1    | 0.2 | 0                               |  | 3  | 2  | 3   | 0   |
| Hydroxysteroid (17-beta) dehydrogenase 4, isoform CRA_b (Fragment) OS=Homo sapiens GN=HSD17B4 PE=2 SV=1                                                           | HSD17B4        | 80 kDa  | 0.19   | 0.2 | 0                               |  | 4  | 2  | 1   | 0   |
| Extended synaptotagmin-2 OS=Homo sapiens GN=ESYT2 PE=1 SV=1                                                                                                       | ESYT2          | 102 kDa | 0.14   | 0.3 | 0                               |  | 2  | 2  | 1   | 0   |
| cDNA FLJ60782, highly similar to Rho-GTPase-activating protein 1 OS=Homo sapiens PE=2 SV=1                                                                        | RHOGEF1        | 53 kDa  | 0.64   | 0.6 | 0                               |  | 3  | 1  | 2   | 0   |
| Epididymis secretory protein Li 10 OS=Homo sapiens GN=HEL-S-10 PE=2 SV=1                                                                                          | HEL-S-10       | 22 kDa  | 0.047  | 0.2 | Fibro-BKO low, Fibro-Naive high |  | 3  | 3  | 0   | 1   |
| Ribosomal protein (Fragment) OS=Homo sapiens GN=RPL10A PE=2 SV=1                                                                                                  | RPL10A         | 24 kDa  | 0.13   | 0.2 | 0                               |  | 3  | 2  | 0   | 1   |
| Epididymis luminal protein 32 OS=Homo sapiens GN=HEL32 PE=2 SV=1                                                                                                  | HEL32          | 19 kDa  | 0.047  | 0.2 | Fibro-BKO low, Fibro-Naive high |  | 3  | 3  | 0   | 1   |
| cDNA FLJ51641, highly similar to Nicastrin OS=Homo sapiens PE=2 SV=1                                                                                              | NCA            | 50 kDa  | 0.71   | 1.8 | 0                               |  | 1  | 1  | 3   | 0   |
| ATP-dependent RNA helicase DDX1 OS=Homo sapiens GN=DDX1 PE=1 SV=1                                                                                                 | DDX1           | 74 kDa  | 0.055  | 0.2 | 0                               |  | 3  | 3  | 1   | 0   |
| Capping protein (Actin filament) muscle Z-line, alpha 2 OS=Homo sapiens GN=CAPZA2 PE=2 SV=1                                                                       | CAPZA2         | 33 kDa  | 0.1    | 0.2 | 0                               |  | 2  | 3  | 0   | 1   |
| Probable ATP-dependent RNA helicase DDX17 OS=Homo sapiens GN=DDX17 PE=1 SV=1                                                                                      | DDX17          | 80 kDa  | 0.15   | 0.1 | 0                               |  | 6  | 3  | 1   | 0   |
| Talin-2 OS=Homo sapiens GN=TLN2 PE=1 SV=1                                                                                                                         | TLN2           | 165 kDa | 0.069  | 4.7 | 0                               |  | 0  | 1  | 2   | 2   |
| Myelin protein zero-like 1, isoform CRA_b OS=Homo sapiens GN=MPZL1 PE=2 SV=1                                                                                      | MPZL1          | 29 kDa  | 0.3    | 4.8 | 0                               |  | 0  | 1  | 3   | 1   |
| Purine nucleoside phosphorylase OS=Homo sapiens PE=2 SV=1                                                                                                         | PUR            | 33 kDa  | 0.36   | 0.3 | 0                               |  | 3  | 1  | 1   | 0   |
| eIF4G1 protein OS=Homo sapiens GN=EIF4G1 PE=2 SV=1                                                                                                                | EIF4G1         | 176 kDa | 0.081  | 0   | 0                               |  | 1  | 2  | 0   | 0   |
| Testicular tissue protein Li 89 OS=Homo sapiens PE=2 SV=1                                                                                                         | TTN            | 25 kDa  | 0.03   | 0   | Fibro-BKO low, Fibro-Naive high |  | 4  | 3  | 0   | 0   |
| 60S ribosomal protein L9 (Fragment) OS=Homo sapiens GN=RPL9 PE=1 SV=8                                                                                             | RPL9           | 21 kDa  | 0.012  | 0   | Fibro-BKO low, Fibro-Naive high |  | 3  | 4  | 0   | 0   |
| SET translocation (Myeloid leukemia-associated), isoform CRA_b OS=Homo sapiens GN=SET PE=3 SV=1                                                                   | SET            | 32 kDa  | 0.027  | 0   | Fibro-BKO low, Fibro-Naive high |  | 2  | 3  | 0   | 0   |
| Protein DEK OS=Homo sapiens GN=DEK PE=1 SV=1                                                                                                                      | DEK            | 40 kDa  | 0.03   | 0   | Fibro-BKO low, Fibro-Naive high |  | 4  | 3  | 0   | 0   |
| Gamma-tubulin complex component OS=Homo sapiens PE=2 SV=1                                                                                                         | GAMT           | 83 kDa  | 0.0011 | 0   | Fibro-BKO low, Fibro-Naive high |  | 2  | 2  | 0   | 0   |
| Caldesmon 1, isoform CRA_i OS=Homo sapiens GN=CALD1 PE=2 SV=1                                                                                                     | CALD1          | 63 kDa  | 0.079  | INF | 0                               |  | 0  | 0  | 2   | 4   |
| Translation initiation factor eIF-2B subunit delta OS=Homo sapiens GN=EIF2B4 PE=1 SV=1                                                                            | EIF2B4         | 57 kDa  | 0.11   | 0   | 0                               |  | 4  | 2  | 0   | 0   |
| Uncharacterized protein OS=Homo sapiens GN=DKFZp686E23209 PE=1 SV=2                                                                                               | DKFZp686E23209 | 52 kDa  | 0.026  | INF | Fibro-BKO high, Fibro-Naive low |  | 0  | 0  | 4   | 6   |
| Plakophilin-4 OS=Homo sapiens GN=PKP4 PE=1 SV=1                                                                                                                   | PKP4           | 134 kDa | 0.86   | 0.7 | 0                               |  | 0  | 3  | 0   | 2   |
| cDNA FLJ56912, highly similar to Fibulin-2 OS=Homo sapiens PE=2 SV=1                                                                                              | FBLN2          | 129 kDa | 0.026  | INF | Fibro-BKO high, Fibro-Naive low |  | 0  | 0  | 2   | 3   |
| cDNA FLJ76823, highly similar to Homo sapiens splicing factor, arginine/serine-rich 6 (SFRS6), mRNA OS=Homo sapiens GN=SFRS6 PE=2 SV=1                            | SFRS6          | 39 kDa  | 0.16   | 0   | 0                               |  | 5  | 2  | 0   | 0   |
| Transmembrane protein 113, isoform CRA_a OS=Homo sapiens GN=TMEM113 PE=4 SV=1                                                                                     | TMEM113        | 35 kDa  | 0.05   | 0   | Fibro-BKO low, Fibro-Naive high |  | 3  | 2  | 0   | 0   |
| Putative uncharacterized protein DKFZp686J11235 (Fragment) OS=Homo sapiens GN=DKFZp686J11235 PE=1 SV=1                                                            | DKFZp686J11235 | 54 kDa  | 0.22   | INF | 0                               |  | 0  | 0  | 1   | 4   |
| Receptor protein-tyrosine kinase (Fragment) OS=Homo sapiens PE=2 SV=1                                                                                             | RET            | 120 kDa | 0.043  | INF | Fibro-BKO high, Fibro-Naive low |  | 0  | 0  | 3   | 5   |
| Ngg1 interacting factor 3 like 1 binding protein 1, isoform CRA_a OS=Homo sapiens GN=NIF3L1BP1 PE=4 SV=1                                                          | NIF3L1BP1      | 24 kDa  | 0.42   | 0   | 0                               |  | 5  | 0  | 0   | 0   |
| Catenin alpha-2 (Fragment) OS=Homo sapiens GN=CTNNA2 PE=1 SV=1                                                                                                    | CTNNA2         | 13 kDa  | 0.52   | 1.9 | 0                               |  | 1  | 2  | 1   | 4   |
| Ribosomal protein S3 variant (Fragment) OS=Homo sapiens PE=2 SV=1                                                                                                 | RPS3B          | 27 kDa  | 0.4    | 0.6 | 0                               |  | 4  | 6  | 4   | 1   |
| Proteasome subunit beta type OS=Homo sapiens PE=2 SV=1                                                                                                            | PSMB5          | 30 kDa  | 0.31   | 1.7 | 0                               |  | 1  | 1  | 1   | 2   |
| STX12 protein (Fragment) OS=Homo sapiens GN=STX12 PE=2 SV=1                                                                                                       | STX12          | 31 kDa  | 0.0052 | 2.3 | Fibro-BKO high, Fibro-Naive low |  | 1  | 1  | 2   | 2   |
| Profilin OS=Homo sapiens PE=2 SV=1                                                                                                                                | PFN1           | 21 kDa  | 0.0082 | 0.6 | Fibro-BKO low, Fibro-Naive high |  | 2  | 2  | 1   | 1   |
| cDNA FLJ56734, moderately similar to Sepiapterin reductase (EC 1.1.1.153) OS=Homo sapiens PE=2 SV=1                                                               | SEPIA          | 13 kDa  | 0.46   | 0.6 | 0                               |  | 1  | 3  | 1   | 1   |
| Membrane cofactor protein (Fragment) OS=Homo sapiens GN=CD46 PE=1 SV=1                                                                                            | CD46           | 9 kDa   | 0.51   | 0.8 | 0                               |  | 1  | 2  | 1   | 1   |
| Guanine nucleotide-binding protein subunit gamma (Fragment) OS=Homo sapiens PE=2 SV=1                                                                             | GNB3           | 8 kDa   | 0.49   | 0.6 | 0                               |  | 3  | 1  | 1   | 1   |
| Serine/threonine-protein phosphatase OS=Homo sapiens PE=2 SV=1                                                                                                    | PPP2R1B        | 39 kDa  | 0.072  | 0.3 | 0                               |  | 16 | 13 | 2   | 6   |
| Monoglyceride lipase OS=Homo sapiens GN=MGLL PE=1 SV=1                                                                                                            | MGLL           | 34 kDa  | 0.0082 | 0.6 | Fibro-BKO low, Fibro-Naive high |  | 2  | 2  | 1   | 1   |
| Ribonucleoside-diphosphate reductase OS=Homo sapiens PE=2 SV=1                                                                                                    | RIBD           | 86 kDa  | 0.46   | 0.6 | 0                               |  | 1  | 3  | 1   | 1   |
| Mitogen-activated protein kinase kinase 1 OS=Homo sapiens GN=MAP2K1 PE=2 SV=1                                                                                     | MAP2K1         | 43 kDa  | 0.55   | 0.7 | 0                               |  | 2  | 1  | 1   | 1   |
| Tubulin beta chain OS=Homo sapiens PE=2 SV=1                                                                                                                      | TUBB1          | 47 kDa  | 0.6    | 1.1 | 0                               |  | 22 | 15 | 17  | 21  |
| 40S ribosomal protein S3 OS=Homo sapiens GN=RPS3 PE=1 SV=1                                                                                                        | RPS3           | 17 kDa  | 0.19   | 0.4 | 0                               |  | 6  | 7  | 4   | 1   |
| Arginine--tRNA ligase, cytoplasmic OS=Homo sapiens GN=RARS PE=1 SV=1                                                                                              | RARS           | 14 kDa  | 0.55   | 0.7 | 0                               |  | 2  | 1  | 1   | 1   |
| MHC class I antigen (Fragment) OS=Homo sapiens GN=HLA-A PE=3 SV=1                                                                                                 | HLA-A          | 38 kDa  | 0.63   | 0.8 | 0                               |  | 9  | 11 | 3   | 12  |
| YBX1 protein (Fragment) OS=Homo sapiens GN=YBX1 PE=2 SV=1                                                                                                         | YBX1           | 29 kDa  | 0.055  | 0.4 | 0                               |  | 6  | 8  | 3   | 2   |
| cDNA FLJ50123 OS=Homo sapiens PE=2 SV=1                                                                                                                           | FLJ50123       | 43 kDa  | 0.069  | 4.5 | 0                               |  | 2  | 2  | 6   | 9   |
| N-acetyl-D-glucosamine kinase OS=Homo sapiens GN=NAGK PE=1 SV=3                                                                                                   | NAGK           | 32 kDa  | 0.33   | 0.4 | 0                               |  | 2  | 1  | 0   | 1   |

|                                                                                                                                            |             |         |        |     |   |    |    |       |
|--------------------------------------------------------------------------------------------------------------------------------------------|-------------|---------|--------|-----|---|----|----|-------|
| cDNA FLJ56798, highly similar to Acid sphingomyelinase-like phosphodiesterase 3b (EC 3.1.4.-) OS=Homo sapiens PE=2 SV=1                    | 51 kDa      | 0.81    | 0.8    | 0   | 2 | 1  | 2  | 0     |
| Keratin 14 (Epidermolysis bullosa simplex, Dowling-Meara, Koebner), isoform CRA_a OS=Homo sapiens GN=KRT14 PE=3 SV=1                       | KRT14       | 30 kDa  | 0.76   | 0.7 | 0 | 2  | 1  | 0 2   |
| Cullin 3, isoform CRA_a OS=Homo sapiens GN=CUL3 PE=3 SV=1                                                                                  | CUL3        | 89 kDa  | 0.33   | 0.4 | 0 | 2  | 1  | 0 1   |
| GDP-mannose pyrophosphorylase A, isoform CRA_a OS=Homo sapiens GN=GMPPA PE=4 SV=1                                                          | GMPPA       | 46 kDa  | 0.08   | 4.4 | 0 | 1  | 0  | 2 2   |
| Metastasis associated 1 family, member 2, isoform CRA_a OS=Homo sapiens GN=MTA2 PE=4 SV=1                                                  | MTA2        | 75 kDa  | 0.26   | 0.4 | 0 | 3  | 3  | 2 0   |
| Hedgehog protein OS=Homo sapiens GN=SHH PE=3 SV=1                                                                                          | SHH         | 50 kDa  | 0.28   | 4.3 | 0 | 1  | 0  | 1 3   |
| SMARCD2 protein OS=Homo sapiens GN=SMARCD2 PE=1 SV=1                                                                                       | SMARCD2     | 56 kDa  | 0.1    | 0.2 | 0 | 2  | 3  | 0 1   |
| cDNA FLJ55486, highly similar to Semaphorin-3C OS=Homo sapiens PE=2 SV=1                                                                   |             | 87 kDa  | 0.12   | 0.3 | 0 | 2  | 2  | 0 1   |
| Rho-associated protein kinase 2 OS=Homo sapiens GN=ROCK2 PE=1 SV=1                                                                         | ROCK2       | 133 kDa | 0.37   | 0.4 | 0 | 2  | 1  | 1 0   |
| DENN/MADD domain containing 2D, isoform CRA_d OS=Homo sapiens GN=DENND2D PE=4 SV=1                                                         | DENND2D     | 53 kDa  | 0.31   | 5.3 | 0 | 1  | 0  | 1 4   |
| cDNA FLJ39945 fis, clone SPLEN2023977, highly similar to Homo sapiens CD97 antigen (CD97), transcript variant 2, mRNA OS=Homo sapiens      |             | 78 kDa  | 0.94   | 1.1 | 0 | 1  | 2  | 0 3   |
| Lysine--tRNA ligase (Fragment) OS=Homo sapiens GN=KARS PE=1 SV=1                                                                           | KARS        | 29 kDa  | 0.77   | 0.7 | 0 | 1  | 2  | 0 2   |
| Serine/threonine-protein phosphatase 2A 55 kDa regulatory subunit B OS=Homo sapiens PE=2 SV=1                                              |             | 52 kDa  | 0.12   | 0.3 | 0 | 2  | 2  | 0 1   |
| Prefoldin subunit 5 (Fragment) OS=Homo sapiens GN=PFDN5 PE=1 SV=1                                                                          | PFDN5       | 17 kDa  | 0.1    | 0.2 | 0 | 2  | 3  | 0 1   |
| Tetraspanin 6, isoform CRA_a OS=Homo sapiens GN=TSPAN6 PE=3 SV=1                                                                           | TSPAN6      | 18 kDa  | 0.3    | 4.8 | 0 | 0  | 1  | 3 1   |
| Testis derived transcript (3 LIM domains) OS=Homo sapiens GN=TES PE=4 SV=1                                                                 | TES         | 48 kDa  | 0.12   | 0.3 | 0 | 2  | 2  | 0 1   |
| MHC class I antigen (Fragment) OS=Homo sapiens GN=HLA-A PE=3 SV=1                                                                          | HLA-A       | 32 kDa  | 0.29   | 0.4 | 0 | 9  | 13 | 0 8   |
| cDNA FLJ55697, highly similar to Protein transport protein Sec23B OS=Homo sapiens PE=2 SV=1                                                |             | 84 kDa  | 0.1    | 0.2 | 0 | 2  | 3  | 0 1   |
| Rho guanine nucleotide exchange factor (GEF) 1, isoform CRA_e OS=Homo sapiens GN=ARHGEF1 PE=4 SV=1                                         | ARHGEF1     | 102 kDa | 0.12   | 0.3 | 0 | 2  | 2  | 0 1   |
| Protein phosphatase 1, regulatory subunit 7, isoform CRA_b OS=Homo sapiens GN=PPP1R7 PE=2 SV=1                                             | PPP1R7      | 42 kDa  | 0.12   | 0.3 | 0 | 2  | 2  | 0 1   |
| Fructosamine-3-kinase-related protein, isoform CRA_a OS=Homo sapiens GN=FN3KRP PE=2 SV=1                                                   | FN3KRP      | 34 kDa  | 0.0011 | 0   | 0 | 3  | 3  | 0 0   |
| Epididymis secretory protein Li 6 OS=Homo sapiens GN=HEL-S-165mP PE=2 SV=1                                                                 | HEL-S-165mP | 37 kDa  | 0.0011 | 0   | 0 | 3  | 3  | 0 0   |
| cDNA FLJ55495, highly similar to Ethanolamine-phosphate cytidyltransferase (EC 2.7.7.14) OS=Homo sapiens PE=2 SV=1                         |             | 41 kDa  | 0.05   | 0   | 0 | 3  | 2  | 0 0   |
| Regulator of chromosome condensation 2, isoform CRA_a OS=Homo sapiens GN=RCC2 PE=4 SV=1                                                    | RCC2        | 56 kDa  | 0.027  | 0   | 0 | 2  | 3  | 0 0   |
| Dimethylarginine dimethylaminohydrolase 2, isoform CRA_a OS=Homo sapiens GN=HEL-S-277 PE=1 SV=1                                            | HEL-S-277   | 30 kDa  | 0.0011 | 0   | 0 | 3  | 3  | 0 0   |
| cDNA FLJ13801 fis, clone THYRO1000173, highly similar to AP-1 complex subunit mu-2 OS=Homo sapiens PE=2 SV=1                               |             | 48 kDa  | 0.0011 | 0   | 0 | 2  | 2  | 0 0   |
| Heterogeneous nuclear ribonucleoprotein A2/B1, isoform CRA_d OS=Homo sapiens GN=HNRPA2B1 PE=4 SV=1                                         | HNRPA2B1    | 31 kDa  | 0.11   | 0   | 0 | 4  | 2  | 0 0   |
| Deoxyribonuclease-1-like 1 (Fragment) OS=Homo sapiens GN=DNASE1L1 PE=1 SV=1                                                                | DNASE1L1    | 24 kDa  | 0.11   | 0   | 0 | 4  | 2  | 0 0   |
| L-xylulose reductase (Fragment) OS=Homo sapiens GN=DCXR PE=1 SV=8                                                                          | DCXR        | 24 kDa  | 0.05   | 0   | 0 | 3  | 2  | 0 0   |
| EMILIN-1 OS=Homo sapiens GN=EMILIN1 PE=1 SV=1                                                                                              | EMILIN1     | 107 kDa | 0.026  | INF | 0 | 0  | 0  | 2 3   |
| Citrate synthase OS=Homo sapiens GN=CS PE=3 SV=1                                                                                           | CS          | 52 kDa  | 0.0011 | 0   | 0 | 2  | 2  | 0 0   |
| Prelamin-A/C (Fragment) OS=Homo sapiens GN=LMNA PE=1 SV=1                                                                                  | LMNA        | 28 kDa  | 0.05   | 0   | 0 | 3  | 2  | 0 0   |
| Ribosomal protein, large, P1, isoform CRA_a OS=Homo sapiens GN=RPLP1 PE=3 SV=1                                                             | RPLP1       | 12 kDa  | 0.11   | 0   | 0 | 4  | 2  | 0 0   |
| Eukaryotic translation initiation factor 4E OS=Homo sapiens GN=EIF4E PE=1 SV=1                                                             | EIF4E       | 29 kDa  | 0.0011 | 0   | 0 | 3  | 3  | 0 0   |
| HCG2016482, isoform CRA_b OS=Homo sapiens GN=hCG_2016482 PE=4 SV=1                                                                         | hCG_2016482 | 23 kDa  | 0.027  | 0   | 0 | 2  | 3  | 0 0   |
| Testis tissue sperm-binding protein Li 45a OS=Homo sapiens PE=2 SV=1                                                                       |             | 36 kDa  | 0.081  | 0   | 0 | 1  | 2  | 0 0   |
| Amidophosphoribosyltransferase OS=Homo sapiens GN=PPAT PE=2 SV=1                                                                           | PPAT        | 57 kDa  | 0.05   | 0   | 0 | 3  | 2  | 0 0   |
| Peroxisome oxidoreductin 3 isoform a variant (Fragment) OS=Homo sapiens PE=2 SV=1                                                          |             | 28 kDa  | 0.25   | 0   | 0 | 4  | 1  | 0 0   |
| cDNA FLJ61699, highly similar to Homo sapiens androgen-induced proliferation inhibitor (APRIN), transcript variant 1, mRNA OS=Homo sapiens |             | 149 kDa | 0.13   | 0   | 0 | 2  | 5  | 0 0   |
| Lipopolysaccharide-responsive and beige-like anchor protein OS=Homo sapiens GN=LRBA PE=1 SV=1                                              | LRBA        | 287 kDa | 0.23   | 0   | 0 | 1  | 4  | 0 0   |
| sp CO5_HUMAN                                                                                                                               |             | 188 kDa | 0.25   | INF | 0 | 0  | 0  | 4 1   |
| Translin OS=Homo sapiens GN=TSN PE=1 SV=1                                                                                                  | TSN         | 26 kDa  | 0.2    | 0   | 0 | 3  | 1  | 0 0   |
| cDNA, FLJ96114, highly similar to Homo sapiens bromodomain and WD repeat domain containing 2 (BRWD2), mRNA OS=Homo sapiens PE=             |             | 137 kDa | 0.17   | 0   | 0 | 1  | 3  | 0 0   |
| Thy-1 cell surface antigen, isoform CRA_a OS=Homo sapiens GN=THY1 PE=2 SV=1                                                                | THY1        | 18 kDa  | 0.051  | INF | 0 | 0  | 0  | 3 2   |
| Queuine tRNA-ribosyltransferase catalytic subunit 1 OS=Homo sapiens GN=QTRT1 PE=2 SV=1                                                     | QTRT1       | 44 kDa  | 0.2    | 0   | 0 | 3  | 1  | 0 0   |
| Polypeptide N-acetylgalactosaminyltransferase OS=Homo sapiens PE=2 SV=1                                                                    |             | 73 kDa  | 0.05   | 0   | 0 | 3  | 2  | 0 0   |
| cDNA FLJ75774, highly similar to Homo sapiens lectin, mannose-binding 2 (LMAN2), mRNA OS=Homo sapiens PE=2 SV=1                            |             | 40 kDa  | 0.42   | 0   | 0 | 4  | 0  | 0 0   |
| Transportin 1, isoform CRA_a OS=Homo sapiens GN=TNPO1 PE=4 SV=1                                                                            | TNPO1       | 102 kDa | 0.25   | 0   | 0 | 4  | 1  | 0 0   |
| Collagen alpha-2(VI) chain (Fragment) OS=Homo sapiens GN=COL6A2 PE=1 SV=1                                                                  | COL6A2      | 26 kDa  | 0.051  | INF | 0 | 0  | 0  | 3 2   |
| Structure specific recognition protein 1, isoform CRA_a OS=Homo sapiens GN=SSRP1 PE=4 SV=1                                                 | SSRP1       | 81 kDa  | 0.25   | 0   | 0 | 4  | 1  | 0 0   |
| Epididymis secretory sperm binding protein Li 134P OS=Homo sapiens GN=HEL-S-134P PE=2 SV=1                                                 | HEL-S-134P  | 52 kDa  | 0.42   | 0   | 0 | 0  | 3  | 0 0   |
| Tubulin beta chain (Fragment) OS=Homo sapiens PE=2 SV=1                                                                                    |             | 50 kDa  | 0.19   | 0.8 | 0 | 38 | 35 | 21 29 |
| Ferritin (Fragment) OS=Homo sapiens GN=FTL PE=3 SV=1                                                                                       | FTL         | 10 kDa  | 0.025  | 2.8 | 0 | 3  | 3  | 8 7   |
| Chromosome 6 open reading frame 55, isoform CRA_b OS=Homo sapiens GN=VTA1 PE=1 SV=1                                                        | VTA1        | 31 kDa  | 0.26   | 0.6 | 0 | 5  | 3  | 2 2   |
| cDNA FLJ53758 OS=Homo sapiens PE=2 SV=1                                                                                                    |             | 38 kDa  | 0.068  | 4.1 | 0 | 3  | 1  | 6 8   |
| Myosin-14 OS=Homo sapiens GN=MYH14 PE=1 SV=1                                                                                               | MYH14       | 58 kDa  | 0.88   | 0.9 | 0 | 2  | 4  | 2 3   |
| Proteasome subunit alpha type OS=Homo sapiens PE=2 SV=1                                                                                    |             | 18 kDa  | 0.26   | 2   | 0 | 3  | 2  | 3 6   |
| Vacuolar protein sorting 35 variant (Fragment) OS=Homo sapiens PE=2 SV=1                                                                   |             | 92 kDa  | 0.11   | 0.4 | 0 | 7  | 11 | 4 3   |
| Annexin (Fragment) OS=Homo sapiens GN=ANXA3 PE=1 SV=1                                                                                      | ANXA3       | 17 kDa  | 0.23   | 0.6 | 0 | 5  | 7  | 4 2   |

|                                                                                                                                     |                   |         |        |     |                                 |    |    |    |    |
|-------------------------------------------------------------------------------------------------------------------------------------|-------------------|---------|--------|-----|---------------------------------|----|----|----|----|
| Tubulin beta chain OS=Homo sapiens PE=2 SV=1                                                                                        |                   | 50 kDa  | 0.35   | 0.8 | 0                               | 74 | 63 | 42 | 58 |
| Tubulin beta chain OS=Homo sapiens PE=2 SV=1                                                                                        |                   | 46 kDa  | 0.86   | 1   | 0                               | 53 | 40 | 35 | 45 |
| Cysteine-rich protein 2 (Fragment) OS=Homo sapiens GN=CRIP2 PE=1 SV=1                                                               | CRIP2             | 21 kDa  | 0.51   | 0.8 | 0                               | 1  | 2  | 1  | 1  |
| Histone-binding protein RBBP7 OS=Homo sapiens GN=RBBP7 PE=1 SV=1                                                                    | RBBP7             | 47 kDa  | 0.51   | 0.8 | 0                               | 1  | 2  | 1  | 1  |
| DYNC1H1 protein OS=Homo sapiens GN=DYNC1H1 PE=2 SV=1                                                                                | DYNC1H1           | 22 kDa  | 0.37   | 1.7 | 0                               | 1  | 1  | 2  | 1  |
| Cortactin, isoform CRA_c OS=Homo sapiens GN=CTTN PE=4 SV=1                                                                          | CTTN              | 57 kDa  | 0.55   | 0.7 | 0                               | 2  | 1  | 1  | 1  |
| 6-phosphogluconolactonase, isoform CRA_b OS=Homo sapiens GN=HEL-S-304 PE=2 SV=1                                                     | HEL-S-304         | 28 kDa  | 0.55   | 0.7 | 0                               | 2  | 1  | 1  | 1  |
| CMP-N-acetylneuraminase-beta-galactosamide-alpha-2,3-sialyltransferase 4 (Fragment) OS=Homo sapiens GN=ST3GAL4                      | ST3GAL4           | 24 kDa  | 0.55   | 0.7 | 0                               | 2  | 1  | 1  | 1  |
| Peptidylprolyl isomerase OS=Homo sapiens PE=2 SV=1                                                                                  |                   | 52 kDa  | 0.55   | 0.7 | 0                               | 2  | 1  | 1  | 1  |
| FERM, RhoGEF and pleckstrin domain-containing protein 1 OS=Homo sapiens GN=FARP1 PE=1 SV=2                                          | FARP1             | 122 kDa | 0.078  | 3   | 0                               | 1  | 4  | 6  | 7  |
| Keratin, type II cytoskeletal 8 (Fragment) OS=Homo sapiens GN=KRT8 PE=1 SV=1                                                        | KRT8              | 31 kDa  | 0.096  | 0.3 | 0                               | 11 | 8  | 2  | 4  |
| Heterogeneous nuclear ribonucleoprotein F, isoform CRA_a OS=Homo sapiens GN=HNRPF PE=4 SV=1                                         | HNRPF             | 46 kDa  | 0.14   | 0.8 | 0                               | 5  | 5  | 3  | 4  |
| ADP-ribosylation factor 4 (Fragment) OS=Homo sapiens GN=ARF4 PE=1 SV=1                                                              | ARF4              | 15 kDa  | 0.096  | 0.3 | 0                               | 10 | 7  | 3  | 2  |
| cDNA FLJ54827, highly similar to Alpha-parvin OS=Homo sapiens PE=2 SV=1                                                             |                   | 33 kDa  | 0.51   | 0.8 | 0                               | 1  | 2  | 1  | 1  |
| Receptor protein-tyrosine kinase OS=Homo sapiens PE=2 SV=1                                                                          |                   | 134 kDa | 0.026  | 3.4 | Fibro-BKO high, Fibro-Naive low | 1  | 2  | 4  | 5  |
| Calcium-transporting ATPase OS=Homo sapiens GN=ATP2B4 PE=3 SV=1                                                                     | ATP2B4            | 134 kDa | 0.48   | 1.7 | 0                               | 1  | 5  | 3  | 6  |
| cDNA FLJ51656, highly similar to Actin-like protein 2 OS=Homo sapiens PE=2 SV=1                                                     |                   | 39 kDa  | 0.12   | 0.3 | 0                               | 4  | 4  | 0  | 2  |
| Phosphoinositide phospholipase C OS=Homo sapiens GN=PLCD3 PE=4 SV=1                                                                 | PLCD3             | 60 kDa  | 0.08   | 4.4 | 0                               | 1  | 0  | 2  | 2  |
| Transmembrane channel-like protein OS=Homo sapiens PE=2 SV=1                                                                        |                   | 87 kDa  | 0.58   | 1.7 | 0                               | 0  | 2  | 1  | 2  |
| CDW4/GRWD1 OS=Homo sapiens GN=GRWD1 PE=2 SV=1                                                                                       | GRWD1             | 49 kDa  | 0.14   | 0.3 | 0                               | 2  | 2  | 1  | 0  |
| Protein kinase C and casein kinase substrate in neurons 2, isoform CRA_a OS=Homo sapiens GN=PACIN2 PE=4 SV=1                        | PACIN2            | 50 kDa  | 0.33   | 0.4 | 0                               | 2  | 1  | 0  | 1  |
| Glyceraldehyde-3-phosphate dehydrogenase OS=Homo sapiens GN=HEL-S-278 PE=2 SV=1                                                     | HEL-S-278         | 45 kDa  | 0.12   | 0.3 | 0                               | 2  | 2  | 0  | 1  |
| cDNA, FLJ93029, highly similar to Homo sapiens COP9 constitutive photomorphogenic homolog subunit 2 (Arabidopsis) (COPS2), mRNA OS= | (COPS2), mRNA OS= | 52 kDa  | 0.33   | 0.4 | 0                               | 2  | 1  | 0  | 1  |
| Signal recognition particle 14 kDa protein OS=Homo sapiens GN=SRP14 PE=1 SV=1                                                       | SRP14             | 13 kDa  | 0.35   | 0.4 | 0                               | 1  | 2  | 1  | 0  |
| Epithelial protein lost in neoplasms beta variant (Fragment) OS=Homo sapiens PE=2 SV=1                                              |                   | 85 kDa  | 0.34   | 0.3 | 0                               | 1  | 3  | 1  | 0  |
| Protein Wnt OS=Homo sapiens PE=2 SV=1                                                                                               |                   | 39 kDa  | 0.069  | 4.7 | 0                               | 0  | 1  | 2  | 2  |
| SRP72 protein (Fragment) OS=Homo sapiens GN=SRP72 PE=2 SV=1                                                                         | SRP72             | 63 kDa  | 0.14   | 0.3 | 0                               | 2  | 2  | 1  | 0  |
| Testicular tissue protein Li 75 OS=Homo sapiens PE=2 SV=1                                                                           |                   | 37 kDa  | 0.34   | 0.3 | 0                               | 3  | 1  | 0  | 1  |
| Syntaxin 4A (Placental), isoform CRA_a OS=Homo sapiens GN=STX4A PE=2 SV=1                                                           | STX4A             | 25 kDa  | 0.34   | 0.3 | 0                               | 1  | 3  | 1  | 0  |
| cDNA FLJ57995, moderately similar to Ubiquitin-conjugating enzyme E2-25 kDa (EC 6.3.2.19) OS=Homo sapiens PE=2 SV=1                 |                   | 16 kDa  | 0.14   | 0.3 | 0                               | 2  | 2  | 1  | 0  |
| Testis tissue sperm-binding protein Li 66n OS=Homo sapiens PE=2 SV=1                                                                |                   | 71 kDa  | 0.31   | 0.4 | 0                               | 1  | 2  | 0  | 1  |
| Sodium/potassium-transporting ATPase subunit alpha (Fragment) OS=Homo sapiens GN=ATP1A2 PE=2 SV=1                                   | ATP1A2            | 112 kDa | 0.78   | 1   | 0                               | 18 | 22 | 18 | 16 |
| HCG1640809, isoform CRA_b OS=Homo sapiens GN=hCG_1640809 PE=4 SV=1                                                                  | hCG_1640809       | 35 kDa  | 0.27   | 4.6 | 0                               | 0  | 1  | 1  | 3  |
| cDNA FLJ77640, highly similar to Homo sapiens copine II (CPNE2), mRNA OS=Homo sapiens PE=2 SV=1                                     |                   | 61 kDa  | 0.34   | 0.3 | 0                               | 1  | 3  | 1  | 0  |
| Beta-hexosaminidase OS=Homo sapiens GN=HEXB PE=3 SV=1                                                                               | HEXB              | 63 kDa  | 0.31   | 0.4 | 0                               | 1  | 2  | 0  | 1  |
| cDNA FLJ75699, highly similar to Homo sapiens osteoclast stimulating factor 1 (OSTF1), mRNA OS=Homo sapiens PE=2 SV=1               |                   | 24 kDa  | 0.31   | 0.4 | 0                               | 1  | 2  | 0  | 1  |
| UPF1 regulator of nonsense transcripts homolog (Yeast), isoform CRA_b OS=Homo sapiens GN=UPF1 PE=4 SV=1                             | UPF1              | 123 kDa | 0.66   | 2.2 | 0                               | 0  | 1  | 0  | 2  |
| AP3D1 protein (Fragment) OS=Homo sapiens GN=AP3D1 PE=2 SV=1                                                                         | AP3D1             | 99 kDa  | 0.62   | 0.4 | 0                               | 0  | 3  | 0  | 1  |
| Serpin peptidase inhibitor, clade H (Heat shock protein 47), member 1, (Collagen binding protein 1), isoform CRA_a OS=              | SERPINH1          | 46 kDa  | 0.11   | 0   | 0                               | 2  | 1  | 0  | 0  |
| eIF2C2 protein (Fragment) OS=Homo sapiens GN=EIF2C2 PE=2 SV=1                                                                       | EIF2C2            | 91 kDa  | 0.0011 | 0   | Fibro-BKO low, Fibro-Naive high | 2  | 2  | 0  | 0  |
| U2 small nuclear RNA auxiliary factor 2 isoform b OS=Homo sapiens GN=U2AF2 PE=2 SV=1                                                | U2AF2             | 53 kDa  | 0.35   | 0.4 | 0                               | 1  | 2  | 1  | 0  |
| Prefoldin subunit 2 OS=Homo sapiens GN=PFDN2 PE=2 SV=1                                                                              | PFDN2             | 17 kDa  | 0.0011 | 0   | Fibro-BKO low, Fibro-Naive high | 2  | 2  | 0  | 0  |
| Plastin-3 OS=Homo sapiens GN=PLS3 PE=1 SV=1                                                                                         | PLS3              | 69 kDa  | 0.081  | 0   | 0                               | 1  | 2  | 0  | 0  |
| Beta-galactosidase OS=Homo sapiens GN=LOC89944 PE=3 SV=1                                                                            | LOC89944          | 72 kDa  | 0.05   | 0   | Fibro-BKO low, Fibro-Naive high | 3  | 2  | 0  | 0  |
| Inter-alpha-trypsin inhibitor heavy chain H3 OS=Homo sapiens GN=ITI3 PE=1 SV=1                                                      | ITI3              | 75 kDa  | 0.026  | INF | Fibro-BKO high, Fibro-Naive low | 0  | 0  | 2  | 3  |
| Single-stranded DNA-binding protein, mitochondrial (Fragment) OS=Homo sapiens GN=SSBP1 PE=1 SV=1                                    | SSBP1             | 16 kDa  | 0.05   | 0   | Fibro-BKO low, Fibro-Naive high | 3  | 2  | 0  | 0  |
| DNA helicase (Fragment) OS=Homo sapiens GN=MCM7 PE=2 SV=1                                                                           | MCM7              | 81 kDa  | 0.05   | 0   | Fibro-BKO low, Fibro-Naive high | 3  | 2  | 0  | 0  |
| Nuclear protein localization 4 homolog (S. cerevisiae), isoform CRA_a OS=Homo sapiens GN=NPLC4 PE=4 SV=1                            | NPLC4             | 68 kDa  | 0.0011 | 0   | Fibro-BKO low, Fibro-Naive high | 2  | 2  | 0  | 0  |
| Lysyl oxidase-like 2 protein isoform b (Fragment) OS=Homo sapiens GN=LOXL2 PE=2 SV=1                                                | LOXL2             | 84 kDa  | 0.0091 | INF | Fibro-BKO high, Fibro-Naive low | 0  | 0  | 18 | 16 |
| cDNA FLJ54595, highly similar to Golgi reassembly-stacking protein 2 OS=Homo sapiens PE=2 SV=1                                      |                   | 42 kDa  | 0.027  | 0   | Fibro-BKO low, Fibro-Naive high | 2  | 2  | 0  | 0  |
| DNA topoisomerase 2 (Fragment) OS=Homo sapiens PE=2 SV=1                                                                            |                   | 134 kDa | 0.0011 | 0   | Fibro-BKO low, Fibro-Naive high | 2  | 2  | 0  | 0  |
| NADPH--cytochrome P450 reductase OS=Homo sapiens GN=POR PE=2 SV=1                                                                   | POR               | 77 kDa  | 0.0011 | 0   | Fibro-BKO low, Fibro-Naive high | 2  | 2  | 0  | 0  |
| MAM domain-containing protein 2 (Fragment) OS=Homo sapiens GN=MAMDC2 PE=1 SV=1                                                      | MAMDC2            | 62 kDa  | 0.051  | INF | 0                               | 0  | 0  | 3  | 2  |
| Eukaryotic translation initiation factor 3 subunit I OS=Homo sapiens GN=EIF3S2 PE=2 SV=1                                            | EIF3S2            | 37 kDa  | 0.0011 | 0   | Fibro-BKO low, Fibro-Naive high | 2  | 2  | 0  | 0  |
| cDNA, FLJ96222, highly similar to Homo sapiens betaine-homocysteine methyltransferase (BHMT), mRNA OS=Homo sapiens PE=2 SV=1        |                   | 45 kDa  | 0.051  | INF | 0                               | 0  | 0  | 3  | 2  |
| Metastasis associated 1, isoform CRA_c OS=Homo sapiens GN=MTA1 PE=4 SV=1                                                            | MTA1              | 71 kDa  | 0.0011 | 0   | Fibro-BKO low, Fibro-Naive high | 3  | 3  | 0  | 0  |
| Inositol monophosphatase domain containing 1, isoform CRA_a OS=Homo sapiens GN=IMPAD1 PE=4 SV=1                                     | IMPAD1            | 39 kDa  | 0.05   | 0   | Fibro-BKO low, Fibro-Naive high | 3  | 2  | 0  | 0  |
| Tyrosine-protein kinase receptor OS=Homo sapiens PE=2 SV=1                                                                          |                   | 146 kDa | 0.05   | 0   | Fibro-BKO low, Fibro-Naive high | 3  | 2  | 0  | 0  |
| Fascin OS=Homo sapiens PE=2 SV=1                                                                                                    |                   | 52 kDa  | 0.0014 | INF | Fibro-BKO high, Fibro-Naive low | 0  | 0  | 2  | 2  |



|                                                                                                                                                          |               |         |        |     |   |    |    |                                 |             |
|----------------------------------------------------------------------------------------------------------------------------------------------------------|---------------|---------|--------|-----|---|----|----|---------------------------------|-------------|
| Procollagen-lysine 1, 2-oxoglutarate 5-dioxygenase 1, isoform CRA_a OS=Homo sapiens GN=PLOD1 PE=4 SV=1                                                   | PLOD1         | 84 kDa  | 0.57   | 3.4 | 0 | 1  | 0  | 3                               | 0           |
| Cysteinyl-tRNA synthetase, isoform CRA_a OS=Homo sapiens GN=CARS PE=3 SV=1                                                                               | CARS          | 85 kDa  | 0.17   | 0   | 0 | 1  | 3  | 0                               | 0           |
| Cell division cycle 2, G1 to S and G2 to M, isoform CRA_c OS=Homo sapiens GN=CDC2 PE=4 SV=1                                                              | CDC2          | 28 kDa  | 0.2    | 0   | 0 | 3  | 1  | 0                               | 0           |
| cDNA FLJ36374 fis, clone THYMU2008185, highly similar to Xaa-Pro aminopeptidase 1 (EC 3.4.11.9) OS=Homo sapiens PE=2 SV=1                                |               | 62 kDa  | 0.11   | 0   | 0 | 2  | 1  | 0                               | 0           |
| Replication protein A 70 kDa DNA-binding subunit (Fragment) OS=Homo sapiens GN=RPA1 PE=1 SV=1                                                            | RPA1          | 35 kDa  | 0.0011 | 0   |   |    |    | Fibro-BKO low, Fibro-Naive high | 2 2 0 0     |
| Malate dehydrogenase OS=Homo sapiens GN=MDH2 PE=2 SV=1                                                                                                   | MDH2          | 36 kDa  | 0.2    | 0   | 0 | 3  | 1  | 0                               | 0           |
| CDW11/WDR57 OS=Homo sapiens GN=WDR57 PE=2 SV=1                                                                                                           | WDR57         | 39 kDa  | 0.081  | 0   | 0 | 1  | 2  | 0                               | 0           |
| HCG2011153, isoform CRA_b OS=Homo sapiens GN=hCG_2011153 PE=4 SV=1                                                                                       | hCG_2011153   | 79 kDa  | 0.17   | 0   | 0 | 1  | 3  | 0                               | 0           |
| Guanine deaminase, isoform CRA_b OS=Homo sapiens GN=GDA PE=4 SV=1                                                                                        | GDA           | 51 kDa  | 0.027  | 0   |   |    |    | Fibro-BKO low, Fibro-Naive high | 2 3 0 0     |
| Nudix (Nucleoside diphosphate linked moiety X)-type motif 21, isoform CRA_a OS=Homo sapiens GN=NUDT21 PE=4 SV=1                                          | NUDT21        | 26 kDa  | 0.027  | 0   |   |    |    | Fibro-BKO low, Fibro-Naive high | 2 3 0 0     |
| AP-2 complex subunit mu OS=Homo sapiens GN=AP2M1 PE=1 SV=1                                                                                               | AP2M1         | 50 kDa  | 0.74   | 0.6 | 0 | 2  | 0  | 1                               | 0           |
| Myosin-reactive immunoglobulin light chain variable region (Fragment) OS=Homo sapiens PE=2 SV=1                                                          |               | 12 kDa  | 0.17   | INF | 0 | 0  | 0  | 1                               | 3           |
| HCG2005638, isoform CRA_a OS=Homo sapiens GN=hCG_2005638 PE=4 SV=1                                                                                       | hCG_2005638   | 49 kDa  | 0.17   | 0   | 0 | 1  | 3  | 0                               | 0           |
| SEC16A protein (Fragment) OS=Homo sapiens GN=SEC16A PE=2 SV=1                                                                                            | SEC16A        | 211 kDa | 0.25   | 0   | 0 | 4  | 1  | 0                               | 0           |
| cDNA FLJ13106 fis, clone NT2RP3002455, highly similar to Dnal homolog subfamily C member 13 OS=Homo sapiens PE=2 SV=1                                    |               | 99 kDa  | 0.42   | 0   | 0 | 0  | 4  | 0                               | 0           |
| MHC class I antigen (Fragment) OS=Homo sapiens GN=HLA-A PE=3 SV=1                                                                                        | HLA-A         | 38 kDa  | 0.51   | 0.7 | 0 | 12 | 17 | 4                               | 14          |
| Putative uncharacterized protein DKFZp686O2462 (Fragment) OS=Homo sapiens GN=DKFZp686O2462 PE=4 SV=1                                                     | DKFZp686O2462 | 72 kDa  | 0.084  | 0.5 | 0 | 7  | 10 | 4                               | 4           |
| Nuclease-sensitive element-binding protein 1 (Fragment) OS=Homo sapiens GN=YBX1 PE=1 SV=1                                                                | YBX1          | 42 kDa  | 0.025  | 0.6 |   |    |    | Fibro-BKO low, Fibro-Naive high | 5 6 3 3     |
| 14-3-3 protein theta (Fragment) OS=Homo sapiens GN=YWHAQ PE=1 SV=1                                                                                       | YWHAQ         | 17 kDa  | 0.042  | 0.4 |   |    |    | Fibro-BKO low, Fibro-Naive high | 6 5 2 2     |
| FERM, RhoGEF and pleckstrin domain-containing protein 1 (Fragment) OS=Homo sapiens GN=FARP1 PE=1 SV=1                                                    | FARP1         | 28 kDa  | 0.11   | 2.8 | 0 | 1  | 1  | 3                               | 2           |
| MIT domain-containing protein 1 (Fragment) OS=Homo sapiens GN=MITD1 PE=1 SV=1                                                                            | MITD1         | 23 kDa  | 0.69   | 0.9 | 0 | 2  | 2  | 2                               | 1           |
| MIT domain-containing protein 1 (Fragment) OS=Homo sapiens GN=MITD1 PE=1 SV=1                                                                            | MITD1         | 28 kDa  | 0.69   | 0.9 | 0 | 2  | 2  | 2                               | 1           |
| Ferritin OS=Homo sapiens GN=FTL PE=1 SV=1                                                                                                                | FTL           | 21 kDa  | 0.052  | 2.1 | 0 | 3  | 4  | 7                               | 6           |
| Cytoplasmic FMR1-interacting protein 1 (Fragment) OS=Homo sapiens GN=CYFIP1 PE=1 SV=1                                                                    | CYFIP1        | 21 kDa  | 0.14   | 1.1 | 0 | 1  | 1  | 1                               | 1           |
| cDNA FLJ56447, highly similar to Dynamin-2 (EC 3.6.5.5) OS=Homo sapiens PE=2 SV=1                                                                        |               | 68 kDa  | 0.51   | 0.8 | 0 | 1  | 2  | 1                               | 1           |
| Annexin (Fragment) OS=Homo sapiens PE=2 SV=1                                                                                                             |               | 35 kDa  | 0.071  | 1.7 | 0 | 6  | 5  | 9                               | 8           |
| cDNA FLJ57899, highly similar to Mitotic checkpoint protein BUB3 OS=Homo sapiens PE=2 SV=1                                                               |               | 28 kDa  | 0.075  | 0.5 | 0 | 5  | 4  | 2                               | 2           |
| Testicular tissue protein Li 27 OS=Homo sapiens PE=2 SV=1                                                                                                |               | 37 kDa  | 0.075  | 0.5 | 0 | 5  | 4  | 2                               | 2           |
| Actin-like protein (Fragment) OS=Homo sapiens GN=ACT PE=4 SV=1                                                                                           | ACT           | 12 kDa  | 0.066  | 1.4 | 0 | 12 | 12 | 13                              | 16          |
| MHC class I antigen (Fragment) OS=Homo sapiens GN=HLA-C PE=3 SV=1                                                                                        | HLA-C         | 32 kDa  | 0.14   | 0.6 | 0 | 12 | 13 | 5                               | 9           |
| Deoxyribose-phosphate aldolase OS=Homo sapiens GN=DERA PE=1 SV=1                                                                                         | DERA          | 31 kDa  | 0.044  | 0.2 |   |    |    | Fibro-BKO low, Fibro-Naive high | 4 6 1 1     |
| Protein SEC13 homolog OS=Homo sapiens GN=SEC13 PE=1 SV=1                                                                                                 | SEC13         | 36 kDa  | 0.18   | 0.4 | 0 | 2  | 4  | 1                               | 1           |
| RAB6A, member RAS oncogene family, isoform CRA_b OS=Homo sapiens GN=RAB6A PE=4 SV=1                                                                      | RAB6A         | 24 kDa  | 0.14   | 0.2 | 0 | 3  | 2  | 1                               | 0           |
| Calcium/calmodulin-dependent serine protein kinase (MAGUK family) OS=Homo sapiens GN=CASK PE=2 SV=1                                                      | CASK          | 102 kDa | 0.12   | 6.9 | 0 | 0  | 1  | 2                               | 4           |
| Flap endonuclease 1 OS=Homo sapiens GN=FEN1 PE=2 SV=1                                                                                                    | FEN1          | 39 kDa  | 0.35   | 0.4 | 0 | 1  | 2  | 1                               | 0           |
| Cytochrome b-5 isoform 1 variant (Fragment) OS=Homo sapiens PE=2 SV=1                                                                                    |               | 15 kDa  | 0.37   | 0.4 | 0 | 2  | 1  | 1                               | 0           |
| Chromosome 1 open reading frame 24, isoform CRA_a OS=Homo sapiens GN=C1orf24 PE=4 SV=1                                                                   | C1orf24       | 103 kDa | 0.31   | 0.4 | 0 | 1  | 2  | 0                               | 1           |
| Serine/threonine-protein kinase 24 OS=Homo sapiens GN=STK24 PE=1 SV=1                                                                                    | STK24         | 46 kDa  | 0.84   | 0.8 | 0 | 0  | 3  | 1                               | 1           |
| cDNA, FLJ96158, highly similar to Homo sapiens calpain 2, (m/II) large subunit (CAPN2), mRNA OS=Homo sapiens PE=2 SV=1                                   |               | 80 kDa  | 0.94   | 1.1 | 0 | 2  | 0  | 1                               | 1           |
| Renin receptor (Fragment) OS=Homo sapiens GN=ATP6AP2 PE=1 SV=1                                                                                           | ATP6AP2       | 33 kDa  | 0.94   | 1.1 | 0 | 2  | 0  | 1                               | 1           |
| Argininosuccinate lyase isoform 1 OS=Homo sapiens GN=ASL PE=2 SV=1                                                                                       | ASL           | 52 kDa  | 0.33   | 0.4 | 0 | 2  | 1  | 0                               | 1           |
| Negative elongation factor B OS=Homo sapiens GN=NELFB PE=1 SV=1                                                                                          | NELFB         | 70 kDa  | 0.31   | 0.4 | 0 | 1  | 2  | 0                               | 1           |
| Complement component 9, isoform CRA_a OS=Homo sapiens GN=C9 PE=4 SV=1                                                                                    | C9            | 63 kDa  | 0.25   | 3.2 | 0 | 1  | 0  | 1                               | 2           |
| Importin-7 (Fragment) OS=Homo sapiens GN=IPO7 PE=1 SV=8                                                                                                  | IPO7          | 15 kDa  | 0.26   | 3.5 | 0 | 0  | 1  | 2                               | 1           |
| cDNA FLJ60713, highly similar to Homo sapiens heterogeneous nuclear ribonucleoprotein A/B (HNRPAB), transcript variant 1, mRNA OS=Homo sapiens PE=2 SV=1 |               | 35 kDa  | 0.33   | 0.4 | 0 | 2  | 1  | 0                               | 1           |
| BM-010 OS=Homo sapiens GN=EIF4A2 PE=2 SV=1                                                                                                               | EIF4A2        | 36 kDa  | 0.81   | 0.8 | 0 | 2  | 1  | 2                               | 0           |
| Neural cell expressed, developmentally down-regulated 4, isoform CRA_b OS=Homo sapiens GN=NEDD4 PE=4 SV=1                                                | NEDD4         | 104 kDa | 0.94   | 1.1 | 0 | 1  | 1  | 0                               | 2           |
| Pyroline-5-carboxylate reductase OS=Homo sapiens GN=PYCRL PE=1 SV=1                                                                                      | PYCRL         | 30 kDa  | 0.33   | 0.4 | 0 | 2  | 1  | 0                               | 1           |
| 40S ribosomal protein S11 OS=Homo sapiens GN=RPS11 PE=1 SV=1                                                                                             | RPS11         | 14 kDa  | 0.33   | 0.4 | 0 | 2  | 1  | 0                               | 1           |
| RuvB-like helicase OS=Homo sapiens PE=2 SV=1                                                                                                             |               | 27 kDa  | 0.11   | 0   | 0 | 4  | 2  | 0                               | 0           |
| cDNA FLJ55860, highly similar to Homo sapiens growth hormone regulated TBC protein 1 (GRTP1), mRNA OS=Homo sapiens PE=2 SV=1                             |               | 39 kDa  | 0.25   | 3.2 | 0 | 1  | 0  | 1                               | 2           |
| Exportin-1 (Fragment) OS=Homo sapiens GN=XPO1 PE=1 SV=1                                                                                                  | XPO1          | 11 kDa  | 0.26   | 3.5 | 0 | 0  | 1  | 2                               | 1           |
| Matrix metalloproteinase 7 preproprotein variant (Fragment) OS=Homo sapiens PE=2 SV=1                                                                    |               | 30 kDa  | 0.11   | INF | 0 | 0  | 0  | 2                               | 1           |
| WD repeat-containing protein 36 OS=Homo sapiens GN=WDR36 PE=1 SV=1                                                                                       | WDR36         | 99 kDa  | 0.11   | 0   | 0 | 2  | 1  | 0                               | 0           |
| COL6A3 protein OS=Homo sapiens GN=COL6A3 PE=2 SV=1                                                                                                       | COL6A3        | 278 kDa | 0.0003 | 84  |   |    |    | Fibro-BKO high, Fibro-Naive low | 0 5 175 184 |
| Urokinase plasminogen activator surface receptor OS=Homo sapiens GN=PLAUR PE=1 SV=1                                                                      | PLAUR         | 32 kDa  | 0.2    | 3.9 | 0 | 1  | 1  | 2                               | 5           |
| Anion exchange protein OS=Homo sapiens GN=SLC4A7 PE=1 SV=1                                                                                               | SLC4A7        | 135 kDa | 0.64   | 2.4 | 0 | 0  | 1  | 2                               | 0           |
| Ig mu chain C region (Fragment) OS=Homo sapiens GN=IGHM PE=1 SV=2                                                                                        | IGHM          | 49 kDa  | 0.033  | INF |   |    |    | Fibro-BKO high, Fibro-Naive low | 0 0 14 22   |
| Testis tissue sperm-binding protein Li 70n OS=Homo sapiens PE=2 SV=1                                                                                     |               | 46 kDa  | 0.0014 | INF |   |    |    | Fibro-BKO high, Fibro-Naive low | 0 0 2 2     |

|                                                                                                                                             |                |         |        |     |                                 |    |    |     |     |
|---------------------------------------------------------------------------------------------------------------------------------------------|----------------|---------|--------|-----|---------------------------------|----|----|-----|-----|
| Eukaryotic translation initiation factor 3 subunit K OS=Homo sapiens GN=EIF3K PE=2 SV=1                                                     | EIF3K          | 25 kDa  | 0.0011 | 0   | Fibro-BKO low, Fibro-Naive high | 2  | 2  | 0   | 0   |
| Adenylate kinase 2, mitochondrial OS=Homo sapiens GN=AK2 PE=2 SV=1                                                                          | AK2            | 26 kDa  | 0.0011 | 0   | Fibro-BKO low, Fibro-Naive high | 2  | 2  | 0   | 0   |
| Transmembrane 9 superfamily member OS=Homo sapiens PE=2 SV=1                                                                                |                | 68 kDa  | 0.0011 | 0   | Fibro-BKO low, Fibro-Naive high | 2  | 2  | 0   | 0   |
| cDNA, FLJ95176, Homo sapiens CGI-48 protein (CGI-48), mRNA OS=Homo sapiens PE=2 SV=1                                                        |                | 58 kDa  | 0.0011 | 0   | Fibro-BKO low, Fibro-Naive high | 2  | 2  | 0   | 0   |
| Serine/arginine-rich-splicing factor 7 OS=Homo sapiens GN=SRSF7 PE=1 SV=1                                                                   | SRSF7          | 16 kDa  | 0.05   | 0   | Fibro-BKO low, Fibro-Naive high | 3  | 2  | 0   | 0   |
| D-dopachrome tautomerase OS=Homo sapiens GN=DDT PE=2 SV=1                                                                                   | DDT            | 13 kDa  | 0.0011 | 0   | Fibro-BKO low, Fibro-Naive high | 2  | 2  | 0   | 0   |
| Integrin alpha 4 variant (Fragment) OS=Homo sapiens PE=2 SV=1                                                                               |                | 95 kDa  | 0.011  | INF | Fibro-BKO high, Fibro-Naive low | 0  | 0  | 3   | 4   |
| NAD(P)H-hydrate epimerase OS=Homo sapiens GN=APOA1BP PE=2 SV=1                                                                              | APOA1BP        | 34 kDa  | 0.0011 | 0   | Fibro-BKO low, Fibro-Naive high | 2  | 2  | 0   | 0   |
| cDNA FLJ75700, highly similar to Homo sapiens complement component 1, q subcomponent binding protein (C1QB), nuclear gene encoding          |                | 31 kDa  | 0.11   | 0   |                                 | 2  | 1  | 0   | 0   |
| cDNA FLJ55318, highly similar to Casein kinase I isoform alpha (EC 2.7.11.1) OS=Homo sapiens PE=2 SV=1                                      |                | 27 kDa  | 0.0011 | 0   | Fibro-BKO low, Fibro-Naive high | 2  | 2  | 0   | 0   |
| Constitutive coactivator of PPAR-gamma-like protein 1 (Fragment) OS=Homo sapiens GN=FAM120A PE=1 SV=1                                       | FAM120A        | 54 kDa  | 0.081  | 0   |                                 | 1  | 2  | 0   | 0   |
| Laminin subunit alpha-2 OS=Homo sapiens GN=LAMA2 PE=1 SV=1                                                                                  | LAMA2          | 344 kDa | 0.079  | INF |                                 | 0  | 0  | 1   | 2   |
| Gamma-tubulin complex component OS=Homo sapiens PE=2 SV=1                                                                                   |                | 103 kDa | 0.081  | 0   |                                 | 1  | 2  | 0   | 0   |
| Serine/threonine-protein phosphatase OS=Homo sapiens GN=PPP5C PE=3 SV=1                                                                     | PPP5C          | 57 kDa  | 0.11   | 0   |                                 | 2  | 1  | 0   | 0   |
| Protein disulfide-isomerase OS=Homo sapiens GN=P4HB PE=2 SV=1                                                                               | P4HB           | 57 kDa  | 0.74   | 0.6 |                                 | 0  | 2  | 0   | 1   |
| RecQ protein-like (DNA helicase Q1-like), isoform CRA_a OS=Homo sapiens GN=RECQL PE=4 SV=1                                                  | RECQL          | 73 kDa  | 0.081  | 0   |                                 | 1  | 2  | 0   | 0   |
| cDNA FLJ77162, highly similar to Homo sapiens SMC1 structural maintenance of chromosomes 1-like 1 (SMC1L1), mRNA (Fragment) OS=Homo sapiens |                | 99 kDa  | 0.11   | 0   |                                 | 2  | 1  | 0   | 0   |
| ATPase, H+ transporting, lysosomal 50/57kDa, V1 subunit H, isoform CRA_a OS=Homo sapiens GN=ATP6V1H PE=4 SV=1                               | ATP6V1H        | 56 kDa  | 0.17   | 0   |                                 | 1  | 3  | 0   | 0   |
| Serine hydroxymethyltransferase OS=Homo sapiens GN=SHMT1 PE=3 SV=1                                                                          | SHMT1          | 49 kDa  | 0.17   | 0   |                                 | 1  | 3  | 0   | 0   |
| N-acylaminoacyl-peptide hydrolase, isoform CRA_b OS=Homo sapiens GN=APEH PE=4 SV=1                                                          | APEH           | 81 kDa  | 0.17   | 0   |                                 | 1  | 3  | 0   | 0   |
| Serine protease HTRA2, mitochondrial (Fragment) OS=Homo sapiens GN=HTRA2 PE=1 SV=1                                                          | HTRA2          | 45 kDa  | 0.17   | 0   |                                 | 1  | 3  | 0   | 0   |
| RAP2C, member of RAS oncogene family, isoform CRA_b OS=Homo sapiens GN=RAP2C PE=1 SV=1                                                      | RAP2C          | 14 kDa  | 0.17   | INF |                                 | 0  | 0  | 1   | 3   |
| Tyrosine-protein kinase receptor OS=Homo sapiens GN=IGF1R PE=1 SV=1                                                                         | IGF1R          | 155 kDa | 0.77   | 0.6 |                                 | 0  | 2  | 1   | 0   |
| COP9 constitutive photomorphogenic-like protein subunit 4 isoform 1 (Fragment) OS=Homo sapiens GN=COPS4 PE=2 SV=1                           | COPS4          | 46 kDa  | 0.2    | 0   |                                 | 3  | 1  | 0   | 0   |
| Epididymis tissue sperm binding protein Li 14m OS=Homo sapiens PE=2 SV=1                                                                    |                | 83 kDa  | 0.2    | 0   |                                 | 3  | 1  | 0   | 0   |
| Eukaryotic translation elongation factor 1 beta 2, isoform CRA_a OS=Homo sapiens GN=EEF1B2 PE=3 SV=1                                        | EEF1B2         | 25 kDa  | 0.2    | 0   |                                 | 3  | 1  | 0   | 0   |
| cDNA FLJ11140 fis, clone PLACE1006488, highly similar to Signal recognition particle 68 kDa protein OS=Homo sapiens PE=2 SV=1               |                | 41 kDa  | 0.11   | 0   |                                 | 2  | 1  | 0   | 0   |
| UDP-galactose-4-epimerase, isoform CRA_b OS=Homo sapiens GN=GALE PE=4 SV=1                                                                  | GALE           | 26 kDa  | 0.0011 | 0   | Fibro-BKO low, Fibro-Naive high | 2  | 2  | 0   | 0   |
| cDNA FLJ10711 fis, clone NT2RP3000917, highly similar to 5'-3' exoribonuclease 2 (EC 3.1.11.-) OS=Homo sapiens PE=2 SV=1                    |                | 109 kDa | 0.11   | 0   |                                 | 2  | 1  | 0   | 0   |
| Vacuolar protein sorting-associated protein 26A OS=Homo sapiens GN=VPS26A PE=1 SV=1                                                         | VPS26A         | 26 kDa  | 0.17   | 0   |                                 | 1  | 3  | 0   | 0   |
| Dimethylarginine dimethylaminohydrolase 1, isoform CRA_b OS=Homo sapiens GN=DDAH1 PE=2 SV=1                                                 | DDAH1          | 31 kDa  | 0.2    | 0   |                                 | 3  | 1  | 0   | 0   |
| Putative uncharacterized protein DKFZp686G02190 (Fragment) OS=Homo sapiens GN=DKFZp686G02190 PE=2 SV=1                                      | DKFZp686G02190 | 49 kDa  | 0.011  | INF | Fibro-BKO high, Fibro-Naive low | 0  | 0  | 6   | 8   |
| MUC5AC (Fragment) OS=Homo sapiens GN=MUC5AC PE=4 SV=1                                                                                       | MUC5AC         | 522 kDa | 0.2    | INF |                                 | 0  | 0  | 3   | 1   |
| Hsp70-binding protein 1 (Fragment) OS=Homo sapiens GN=HSPBP1 PE=1 SV=1                                                                      | HSPBP1         | 11 kDa  | 0.6    | 0.3 |                                 | 3  | 0  | 0   | 1   |
| IGL@ protein OS=Homo sapiens GN=IGL@ PE=2 SV=1                                                                                              | IGL            | 25 kDa  | 0.33   | INF |                                 | 0  | 0  | 2   | 18  |
| CLE7 OS=Homo sapiens GN=C14orf166 PE=2 SV=1                                                                                                 | C14orf166      | 28 kDa  | 0.74   | 0.6 |                                 | 2  | 0  | 1   | 0   |
| cDNA FLJ58027 OS=Homo sapiens PE=2 SV=1                                                                                                     |                | 47 kDa  | 0.28   | 0   |                                 | 5  | 1  | 0   | 0   |
| Chromosome 7 open reading frame 24 OS=Homo sapiens GN=C7orf24 PE=4 SV=1                                                                     | C7orf24        | 21 kDa  | 0.081  | 0   |                                 | 1  | 2  | 0   | 0   |
| cDNA, FLJ93744, highly similar to Homo sapiens keratin 6E (KRT6E), mRNA OS=Homo sapiens PE=2 SV=1                                           |                | 60 kDa  | 0.47   | 1.6 |                                 | 2  | 3  | 2   | 5   |
| Component of oligomeric golgi complex 4, isoform CRA_d OS=Homo sapiens GN=COG4 PE=4 SV=1                                                    | COG4           | 90 kDa  | 0.17   | 0   |                                 | 1  | 3  | 0   | 0   |
| cDNA FLJ51241, highly similar to Nidogen-1 OS=Homo sapiens PE=2 SV=1                                                                        |                | 79 kDa  | 0.42   | INF |                                 | 0  | 0  | 0   | 2   |
| THO complex subunit 1 OS=Homo sapiens GN=THOC1 PE=1 SV=1                                                                                    | THOC1          | 76 kDa  | 0.42   | 0   |                                 | 0  | 4  | 0   | 0   |
| BXDC2 protein (Fragment) OS=Homo sapiens GN=BXDC2 PE=2 SV=1                                                                                 | BXDC2          | 39 kDa  | 0.42   | 0   |                                 | 5  | 0  | 0   | 0   |
| 26S protease regulatory subunit 6A OS=Homo sapiens GN=PSMC3 PE=1 SV=1                                                                       | PSMC3          | 47 kDa  | 0.89   | 1   |                                 | 10 | 6  | 7   | 8   |
| H.sapiens ras-related Hrab1A protein OS=Homo sapiens GN=RAB1A PE=2 SV=1                                                                     | RAB1A          | 23 kDa  | 0.94   | 1   |                                 | 5  | 3  | 2   | 5   |
| Junction adhesion molecule OS=Homo sapiens PE=2 SV=1                                                                                        |                | 28 kDa  | 0.071  | 0.6 |                                 | 7  | 9  | 4   | 5   |
| Serine/threonine-protein phosphatase OS=Homo sapiens GN=PPP1CC PE=3 SV=1                                                                    | PPP1CC         | 37 kDa  | 0.045  | 0.3 | Fibro-BKO low, Fibro-Naive high | 16 | 13 | 3   | 5   |
| MHC class I antigen (Fragment) OS=Homo sapiens GN=HLA-B PE=3 SV=1                                                                           | HLA-B          | 32 kDa  | 0.82   | 0.9 |                                 | 7  | 12 | 4   | 11  |
| Heat shock 70kDa protein 2, isoform CRA_a OS=Homo sapiens GN=HSPA2 PE=3 SV=1                                                                | HSPA2          | 70 kDa  | 0.78   | 1.1 |                                 | 17 | 14 | 15  | 15  |
| HLA class I antigen OS=Homo sapiens GN=HLA-C PE=3 SV=1                                                                                      | HLA-C          | 41 kDa  | 0.13   | 0.5 |                                 | 11 | 15 | 4   | 8   |
| RAP1A, member of RAS oncogene family OS=Homo sapiens GN=RAP1A PE=2 SV=1                                                                     | RAP1A          | 21 kDa  | 0.54   | 1   |                                 | 6  | 7  | 6   | 6   |
| cDNA FLJ54752, highly similar to Poly(rC)-binding protein 2 OS=Homo sapiens PE=2 SV=1                                                       |                | 30 kDa  | 0.36   | 0.5 |                                 | 5  | 3  | 1   | 3   |
| 40S ribosomal protein S6 OS=Homo sapiens GN=RPS6 PE=1 SV=1                                                                                  | RPS6           | 25 kDa  | 0.35   | 0.4 |                                 | 1  | 2  | 1   | 0   |
| RAB5A, member RAS oncogene family, isoform CRA_a OS=Homo sapiens GN=RAB5A PE=4 SV=1                                                         | RAB5A          | 24 kDa  | 0.55   | 0.6 |                                 | 2  | 2  | 2   | 0   |
| cDNA FLJ57871, highly similar to Brix domain-containing protein 2 OS=Homo sapiens PE=2 SV=1                                                 |                | 20 kDa  | 0.33   | 0.4 |                                 | 2  | 1  | 0   | 1   |
| Putative uncharacterized protein DKFZp686O12165 (Fragment) OS=Homo sapiens GN=DKFZp686O12165 PE=2 SV=1                                      | DKFZp686O12165 | 241 kDa | 0.0016 | 56  | Fibro-BKO high, Fibro-Naive low | 9  | 15 | 588 | 587 |
| MHC class I antigen (Fragment) OS=Homo sapiens GN=HLA-C PE=3 SV=1                                                                           | HLA-C          | 21 kDa  | 0.35   | 0.4 |                                 | 6  | 9  | 0   | 6   |
| Radixin OS=Homo sapiens GN=RDY PE=2 SV=1                                                                                                    | RDY            | 69 kDa  | 0.75   | 0.7 |                                 | 5  | 7  | 0   | 8   |
| Histone H2A OS=Homo sapiens GN=HIST1H2AC PE=3 SV=1                                                                                          | HIST1H2AC      | 14 kDa  | 0.082  | 0.2 |                                 | 42 | 26 | 6   | 5   |

|                                                                                                                                          |           |         |        |     |   |    |    |    |    |
|------------------------------------------------------------------------------------------------------------------------------------------|-----------|---------|--------|-----|---|----|----|----|----|
| Lipolysis-stimulated lipoprotein receptor (Fragment) OS=Homo sapiens GN=LSR PE=1 SV=1                                                    | LSR       | 12 kDa  | 0.64   | 1.6 | 0 | 0  | 3  | 2  | 2  |
| cdNA FLJ53308, highly similar to 2-oxoglutarate dehydrogenase E1 component, mitochondrial (EC 1.2.4.2) OS=Homo sapiens PE=2 SV=1         |           | 111 kDa | 0.16   | 0.2 | 0 | 2  | 4  | 1  | 0  |
| Dynamin 2 isoform 4 variant (Fragment) OS=Homo sapiens PE=2 SV=1                                                                         |           | 55 kDa  | 0.081  | 0   | 0 | 1  | 2  | 0  | 0  |
| HCG24991, isoform CRA_a OS=Homo sapiens GN=hCG_24991 PE=4 SV=1                                                                           | hCG_24991 | 23 kDa  | 0.0014 | INF | 0 | 0  | 0  | 1  | 1  |
| MHC class I antigen (Fragment) OS=Homo sapiens GN=HLA-B PE=3 SV=1                                                                        | HLA-B     | 38 kDa  | 0.71   | 1.5 | 0 | 0  | 9  | 3  | 9  |
| cdNA, FLJ93632, highly similar to Homo sapiens heterogeneous nuclear ribonucleoprotein R (HNRPR), mRNA OS=Homo sapiens PE=2 SV=1         |           | 71 kDa  | 0.027  | 0   | 0 | 2  | 3  | 0  | 0  |
| RAB5B, member RAS oncogene family, isoform CRA_a OS=Homo sapiens GN=RAB5B PE=4 SV=1                                                      | RAB5B     | 24 kDa  | 0.05   | 0   | 0 | 3  | 2  | 0  | 0  |
| Ephrin type-B receptor 2 OS=Homo sapiens GN=EPHB2 PE=1 SV=1                                                                              | EPHB2     | 106 kDa | 0.027  | 0   | 0 | 2  | 3  | 0  | 0  |
| Laminin subunit alpha-4 OS=Homo sapiens GN=LAMA4 PE=1 SV=1                                                                               | LAMA4     | 203 kDa | 0.0019 | INF | 0 | 0  | 0  | 17 | 20 |
| Laminin, alpha 4, isoform CRA_b OS=Homo sapiens GN=LAMA4 PE=4 SV=1                                                                       | LAMA4     | 202 kDa | 0.0001 | INF | 0 | 0  | 0  | 18 | 19 |
| Cullin-4A OS=Homo sapiens GN=CUL4A PE=1 SV=1                                                                                             | CUL4A     | 78 kDa  | 0.05   | 0   | 0 | 3  | 2  | 0  | 0  |
| Dipeptidyl peptidase 3 OS=Homo sapiens GN=DPP3 PE=1 SV=1                                                                                 | DPP3      | 84 kDa  | 0.0093 | 0   | 0 | 10 | 13 | 0  | 0  |
| Importin subunit alpha OS=Homo sapiens GN=KPNA1 PE=2 SV=1                                                                                | KPNA1     | 60 kDa  | 0.05   | 0   | 0 | 3  | 2  | 0  | 0  |
| SFRS protein kinase 1, isoform CRA_e OS=Homo sapiens GN=SRPK1 PE=4 SV=1                                                                  | SRPK1     | 62 kDa  | 0.2    | 0   | 0 | 3  | 1  | 0  | 0  |
| Full-length cDNA clone CS0DD006YL02 of Neuroblastoma of Homo sapiens (human) OS=Homo sapiens PE=2 SV=1                                   |           | 41 kDa  | 0.026  | INF | 0 | 0  | 0  | 14 | 21 |
| Serine/arginine-rich-splicing factor 3 OS=Homo sapiens GN=SRSF3 PE=1 SV=1                                                                | SRSF3     | 10 kDa  | 0.0011 | 0   | 0 | 2  | 2  | 0  | 0  |
| Septin-8 OS=Homo sapiens GN=SEPT8 PE=1 SV=1                                                                                              |           | 49 kDa  | 0.2    | 0   | 0 | 3  | 1  | 0  | 0  |
| Thioredoxin reductase 1 OS=Homo sapiens GN=TXNRD1 PE=3 SV=1                                                                              | TXNRD1    | 68 kDa  | 0.081  | 0   | 0 | 1  | 2  | 0  | 0  |
| Phosphoenolpyruvate carboxykinase [GTP], mitochondrial OS=Homo sapiens GN=PCK2 PE=1 SV=1                                                 | PCK2      | 48 kDa  | 0.081  | 0   | 0 | 1  | 2  | 0  | 0  |
| cdNA FLJ44170 fis, clone THYMU2035319, highly similar to RNA-binding region-containing protein 2 OS=Homo sapiens PE=2 SV=1               |           | 57 kDa  | 0.081  | 0   | 0 | 1  | 2  | 0  | 0  |
| cdNA FLJ61095, highly similar to Ubiquitin conjugation factor E4 A (Fragment) OS=Homo sapiens PE=2 SV=1                                  |           | 120 kDa | 0.081  | 0   | 0 | 1  | 2  | 0  | 0  |
| cdNA FLJ52497, highly similar to Protein NDRG3 OS=Homo sapiens PE=2 SV=1                                                                 |           | 31 kDa  | 0.081  | 0   | 0 | 1  | 2  | 0  | 0  |
| ATP synthase subunit beta (Fragment) OS=Homo sapiens GN=ATP5B PE=1 SV=1                                                                  | ATP5B     | 38 kDa  | 0.081  | 0   | 0 | 1  | 2  | 0  | 0  |
| Acidic leucine-rich nuclear phosphoprotein 32 family member A OS=Homo sapiens GN=ANP32A PE=1 SV=1                                        | ANP32A    | 20 kDa  | 0.081  | 0   | 0 | 1  | 2  | 0  | 0  |
| Cytidine 5'-monophosphate N-acetylneuraminic acid synthetase variant (Fragment) OS=Homo sapiens PE=2 SV=1                                |           | 48 kDa  | 0.081  | 0   | 0 | 1  | 2  | 0  | 0  |
| cdNA FLJ51951, highly similar to Squamous cell carcinoma antigen recognized by T-cells 3 (Fragment) OS=Homo sapiens PE=2 SV=1            |           | 74 kDa  | 0.081  | 0   | 0 | 1  | 2  | 0  | 0  |
| Testicular tissue protein Li 138 OS=Homo sapiens PE=2 SV=1                                                                               |           | 55 kDa  | 0.081  | 0   | 0 | 1  | 2  | 0  | 0  |
| Mal, T-cell differentiation protein 2, isoform CRA_a OS=Homo sapiens GN=MAL2 PE=4 SV=1                                                   | MAL2      | 19 kDa  | 0.081  | 0   | 0 | 1  | 2  | 0  | 0  |
| ESRP1/RAF1 fusion protein OS=Homo sapiens PE=2 SV=1                                                                                      |           | 119 kDa | 0.081  | 0   | 0 | 1  | 2  | 0  | 0  |
| SLC9A3R2 protein (Fragment) OS=Homo sapiens GN=SLC9A3R2 PE=2 SV=1                                                                        | SLC9A3R2  | 41 kDa  | 0.66   | 2.3 | 0 | 1  | 0  | 2  | 0  |
| CKAP5 protein OS=Homo sapiens GN=CKAP5 PE=2 SV=1                                                                                         | CKAP5     | 107 kDa | 0.081  | 0   | 0 | 1  | 2  | 0  | 0  |
| Anti-(ED-B) scFV (Fragment) OS=Homo sapiens PE=2 SV=2                                                                                    |           | 25 kDa  | 0.17   | INF | 0 | 0  | 0  | 1  | 3  |
| Alpha-adducin OS=Homo sapiens GN=ADD1 PE=1 SV=1                                                                                          | ADD1      | 44 kDa  | 0.77   | 0.6 | 0 | 0  | 2  | 1  | 0  |
| Ribose-phosphate pyrophosphokinase 3 OS=Homo sapiens GN=PRPS1L1 PE=1 SV=1                                                                | PRPS1L1   | 35 kDa  | 0.079  | INF | 0 | 0  | 0  | 1  | 2  |
| cdNA, FLJ93928, highly similar to Homo sapiens PDZ domain containing ring finger 1 (PDZRN1), mRNA OS=Homo sapiens PE=2 SV=1              |           | 76 kDa  | 0.079  | INF | 0 | 0  | 0  | 1  | 2  |
| Short-chain dehydrogenase/reductase, isoform CRA_b OS=Homo sapiens GN=MG4172 PE=3 SV=1                                                   | MG4172    | 28 kDa  | 0.11   | 0   | 0 | 2  | 1  | 0  | 0  |
| F-box and leucine-rich repeat protein 18, isoform CRA_b OS=Homo sapiens GN=FBXL18 PE=4 SV=1                                              | FBXL18    | 79 kDa  | 0.11   | 0   | 0 | 2  | 1  | 0  | 0  |
| Kinesin light chain 4, isoform CRA_a OS=Homo sapiens GN=KLC4 PE=4 SV=1                                                                   | KLC4      | 69 kDa  | 0.11   | 0   | 0 | 2  | 1  | 0  | 0  |
| Golgi SNAP receptor complex member 1 OS=Homo sapiens PE=2 SV=1                                                                           |           | 29 kDa  | 0.11   | 0   | 0 | 2  | 1  | 0  | 0  |
| Uncharacterized protein OS=Homo sapiens PE=4 SV=1                                                                                        |           | 51 kDa  | 0.11   | 0   | 0 | 2  | 1  | 0  | 0  |
| Protein FAM234A (Fragment) OS=Homo sapiens GN=FAM234A PE=1 SV=1                                                                          | FAM234A   | 21 kDa  | 0.66   | 2.2 | 0 | 0  | 1  | 0  | 2  |
| Small nuclear ribonucleoprotein Sm D2 OS=Homo sapiens GN=SNRPD2 PE=1 SV=1                                                                | SNRPD2    | 9 kDa   | 0.11   | 0   | 0 | 2  | 1  | 0  | 0  |
| 40S ribosomal protein S27 OS=Homo sapiens GN=RPS27 PE=1 SV=1                                                                             | RPS27     | 7 kDa   | 0.11   | 0   | 0 | 2  | 1  | 0  | 0  |
| Epididymis secretory protein Li 100 OS=Homo sapiens GN=HEL-S-100 PE=2 SV=1                                                               | HEL-S-100 | 40 kDa  | 0.11   | 0   | 0 | 2  | 1  | 0  | 0  |
| Leucine rich repeat containing 57, isoform CRA_c OS=Homo sapiens GN=LRRC57 PE=4 SV=1                                                     | LRRC57    | 27 kDa  | 0.11   | 0   | 0 | 2  | 1  | 0  | 0  |
| Methyl-CpG-binding protein 2 OS=Homo sapiens GN=MECP2 PE=1 SV=1                                                                          | MECP2     | 19 kDa  | 0.11   | 0   | 0 | 2  | 1  | 0  | 0  |
| cdNA FLJ53631, highly similar to Interleukin adhesion molecule 1 OS=Homo sapiens PE=2 SV=1                                               |           | 48 kDa  | 0.77   | 0.6 | 0 | 0  | 2  | 1  | 0  |
| Clusterin (Fragment) OS=Homo sapiens GN=CLU PE=1 SV=1                                                                                    | CLU       | 24 kDa  | 0.11   | INF | 0 | 0  | 0  | 2  | 1  |
| LIM and senescent cell antigen-like-containing domain protein OS=Homo sapiens GN=LIMS4 PE=1 SV=1                                         | LIMS4     | 46 kDa  | 0.11   | INF | 0 | 0  | 0  | 2  | 1  |
| Eukaryotic translation initiation factor 2 beta OS=Homo sapiens GN=EIF2S2 PE=2 SV=1                                                      | EIF2S2    | 38 kDa  | 0.11   | 0   | 0 | 2  | 1  | 0  | 0  |
| Protein FAM3C (Fragment) OS=Homo sapiens GN=FAM3C PE=1 SV=1                                                                              | FAM3C     | 16 kDa  | 0.11   | 0   | 0 | 2  | 1  | 0  | 0  |
| DNA helicase OS=Homo sapiens GN=MCM4 PE=3 SV=1                                                                                           | MCM4      | 97 kDa  | 0.11   | 0   | 0 | 2  | 1  | 0  | 0  |
| Serine/threonine-protein phosphatase OS=Homo sapiens GN=PPP4C PE=3 SV=1                                                                  | PPP4C     | 35 kDa  | 0.2    | 0   | 0 | 3  | 1  | 0  | 0  |
| Aminoacylase-1 OS=Homo sapiens GN=ACY1 PE=3 SV=1                                                                                         | ACY1      | 42 kDa  | 0.081  | 0   | 0 | 1  | 2  | 0  | 0  |
| Pleckstrin homology domain containing, family C (With FERM domain) member 1, isoform CRA_b OS=Homo sapiens GN=PLEKHC1                    | PLEKHC1   | 78 kDa  | 0.079  | INF | 0 | 0  | 0  | 1  | 2  |
| Mitogen-activated protein kinase OS=Homo sapiens GN=MAPK13 PE=2 SV=1                                                                     | MAPK13    | 42 kDa  | 0.11   | 0   | 0 | 2  | 1  | 0  | 0  |
| Processing of 1, ribonuclease P/MRP subunit (S. cerevisiae) OS=Homo sapiens GN=POP1 PE=2 SV=1                                            | POP1      | 115 kDa | 0.74   | 0.6 | 0 | 0  | 2  | 0  | 1  |
| Fermitin family homolog 3 (Fragment) OS=Homo sapiens GN=FERMT3 PE=1 SV=1                                                                 | FERMT3    | 33 kDa  | 0.42   | INF | 0 | 0  | 0  | 0  | 2  |
| Serpin peptidase inhibitor, clade E (Nexin, plasminogen activator inhibitor type 1), member 1, isoform CRA_b OS=Homo sapiens GN=SERPINE1 | SERPINE1  | 45 kDa  | 0.42   | INF | 0 | 0  | 0  | 0  | 2  |

|                                                                                                                                                                                  |                |         |        |      |                                 |    |    |     |     |
|----------------------------------------------------------------------------------------------------------------------------------------------------------------------------------|----------------|---------|--------|------|---------------------------------|----|----|-----|-----|
| Structural maintenance of chromosomes protein OS=Homo sapiens PE=2 SV=1                                                                                                          |                | 142 kDa | 0.42   | 0    | 0                               | 0  | 3  | 0   | 0   |
| cDNA FLJ13894 fis, clone THYRO1001671, highly similar to 59 kDa 2'-5'-oligoadenylate synthetase-like protein OS=Homo sapiens PE=2 SV=1                                           |                | 59 kDa  | 0.42   | 0    | 0                               | 0  | 3  | 0   | 0   |
| E3 ubiquitin-protein ligase RNF213 OS=Homo sapiens GN=RNF213 PE=1 SV=1                                                                                                           | RNF213         | 596 kDa | 0.42   | INF  | 0                               | 0  | 0  | 2   | 0   |
| DEAD/H(Asp-Glu-Ala-Asp/His)box polypeptide 21 OS=Homo sapiens GN=OK/SW-cl.65 PE=2 SV=1                                                                                           | OK             | 16 kDa  | 0.42   | 0    | 0                               | 2  | 0  | 0   | 0   |
| Rho GTPase activating protein OS=Homo sapiens PE=2 SV=1                                                                                                                          |                | 75 kDa  | 0.42   | 0    | 0                               | 3  | 0  | 0   | 0   |
| ADAM metalloproteinase domain 17 OS=Homo sapiens GN=ADAM17 PE=2 SV=1                                                                                                             | ADAM17         | 93 kDa  | 0.42   | INF  | 0                               | 0  | 0  | 3   | 0   |
| Perilipin-3 (Fragment) OS=Homo sapiens GN=PLIN3 PE=1 SV=1                                                                                                                        | PLIN3          | 32 kDa  | 0.42   | INF  | 0                               | 0  | 0  | 3   | 0   |
| Endoglin (Osler-Rendu-Weber syndrome 1), isoform CRA_a OS=Homo sapiens GN=ENG PE=4 SV=1                                                                                          | ENG            | 71 kDa  | 0.42   | INF  | 0                               | 0  | 0  | 0   | 2   |
| Sex hormone-binding globulin OS=Homo sapiens GN=SHBG PE=1 SV=1                                                                                                                   | SHBG           | 37 kDa  | 0.42   | 0    | 0                               | 2  | 0  | 0   | 0   |
| ATP-binding cassette sub-family F member 1 (Fragment) OS=Homo sapiens GN=ABCF1 PE=1 SV=1                                                                                         | ABCF1          | 68 kDa  | 0.42   | 0    | 0                               | 2  | 0  | 0   | 0   |
| cDNA FLJ32365 fis, clone PUAEN1000161, highly similar to Homo sapiens CCR4-NOT transcription complex, subunit 1 (CNOT1), transcript variant 1 OS=Homo sapiens GN=CNOT1 PE=1 SV=1 |                | 120 kDa | 0.42   | 0    | 0                               | 0  | 2  | 0   | 0   |
| Dedicator of cytokinesis protein 9 OS=Homo sapiens GN=DOCK9 PE=1 SV=2                                                                                                            | DOCK9          | 238 kDa | 0.42   | 0    | 0                               | 0  | 2  | 0   | 0   |
| Overexpressed in colon carcinoma 1 protein (Fragment) OS=Homo sapiens GN=C12orf75 PE=1 SV=2                                                                                      | C12orf75       | 9 kDa   | 0.42   | INF  | 0                               | 0  | 0  | 0   | 2   |
| Filamin A OS=Homo sapiens GN=FLNA PE=1 SV=1                                                                                                                                      | FLNA           | 278 kDa | 0.0067 | 8.3  | Fibro-BKO high, Fibro-Naive low | 3  | 10 | 47  | 47  |
| cDNA FLJ11352 fis, clone HEMBA1000020, highly similar to Tubulin beta-2C chain OS=Homo sapiens PE=2 SV=1                                                                         |                | 45 kDa  | 0.45   | 0.8  | 0                               | 40 | 31 | 23  | 30  |
| Aminopeptidase B OS=Homo sapiens GN=RNPEP PE=4 SV=1                                                                                                                              | RNPEP          | 73 kDa  | 0.038  | 0.08 | Fibro-BKO low, Fibro-Naive high | 6  | 9  | 1   | 0   |
| JTV1 gene, isoform CRA_a OS=Homo sapiens GN=JTV1 PE=4 SV=1                                                                                                                       | JTV1           | 35 kDa  | 0.41   | 0.6  | 0                               | 8  | 4  | 4   | 2   |
| Neuroblastoma RAS viral (V-ras) oncogene homolog OS=Homo sapiens GN=NRAS PE=2 SV=1                                                                                               | NRAS           | 21 kDa  | 0.0082 | 0.6  | Fibro-BKO low, Fibro-Naive high | 4  | 4  | 2   | 2   |
| Actin-like protein (Fragment) OS=Homo sapiens GN=ACT PE=4 SV=1                                                                                                                   | ACT            | 11 kDa  | 0.25   | 1.9  | 0                               | 4  | 7  | 11  | 7   |
| Aminopeptidase B OS=Homo sapiens GN=RNPEP PE=1 SV=1                                                                                                                              | RNPEP          | 68 kDa  | 0.083  | 0.1  | 0                               | 6  | 10 | 2   | 0   |
| Putative uncharacterized protein DKFZp686L11144 (Fragment) OS=Homo sapiens GN=DKFZp686L11144 PE=2 SV=1                                                                           | DKFZp686L11144 | 113 kDa | 0.0012 | 48   | Fibro-BKO high, Fibro-Naive low | 7  | 16 | 485 | 489 |
| FERM, RhoGEF and pleckstrin domain-containing protein 1 OS=Homo sapiens GN=FARP1 PE=1 SV=1                                                                                       | FARP1          | 88 kDa  | 0.51   | 1.8  | 0                               | 0  | 5  | 3   | 5   |
| Basement membrane-specific heparan sulfate proteoglycan core protein variant (Fragment) OS=Homo sapiens PE=2 SV=1                                                                |                | 246 kDa | 0.022  | 7.9  | Fibro-BKO high, Fibro-Naive low | 0  | 48 | 151 | 176 |
| Vacuolar protein sorting-associated protein VTA1 homolog OS=Homo sapiens GN=VTA1 PE=1 SV=1                                                                                       | VTA1           | 27 kDa  | 0.061  | 0.3  | 0                               | 4  | 3  | 1   | 1   |
| Septin-2 (Fragment) OS=Homo sapiens GN=SEPT2 PE=1 SV=1                                                                                                                           |                | 17 kDa  | 0.02   | 0.3  | Fibro-BKO low, Fibro-Naive high | 8  | 7  | 2   | 2   |
| 40S ribosomal protein S6 OS=Homo sapiens GN=RP56 PE=2 SV=1                                                                                                                       | RP56           | 29 kDa  | 0.081  | 0    | 0                               | 1  | 2  | 0   | 0   |
| Ragulator complex protein LAMTOR1 OS=Homo sapiens GN=LAMTOR1 PE=1 SV=1                                                                                                           | LAMTOR1        | 16 kDa  | 0.76   | 0.7  | 0                               | 2  | 1  | 0   | 2   |
| Rab GDP dissociation inhibitor (Fragment) OS=Homo sapiens GN=GDI1 PE=2 SV=1                                                                                                      | GDI1           | 51 kDa  | 0.0011 | 0    | Fibro-BKO low, Fibro-Naive high | 13 | 13 | 0   | 2   |
| 2-deoxyribose-5-phosphate aldolase homolog (C. elegans), isoform CRA_a OS=Homo sapiens GN=DERA PE=1 SV=1                                                                         | DERA           | 25 kDa  | 0.027  | 0    | Fibro-BKO low, Fibro-Naive high | 4  | 6  | 0   | 0   |
| cDNA FLJ60208, highly similar to Integrin alpha-4 OS=Homo sapiens PE=2 SV=1                                                                                                      |                | 40 kDa  | 0.011  | INF  | Fibro-BKO high, Fibro-Naive low | 0  | 0  | 3   | 4   |
| Synaptophysin-like protein 1 OS=Homo sapiens GN=SYPL1 PE=1 SV=1                                                                                                                  | SYPL1          | 25 kDa  | 0.081  | 0    | 0                               | 1  | 2  | 0   | 0   |
| SCC-112 protein, isoform CRA_b OS=Homo sapiens GN=PDS5A PE=2 SV=1                                                                                                                | PDS5A          | 151 kDa | 0.0011 | 0    | Fibro-BKO low, Fibro-Naive high | 2  | 2  | 0   | 0   |
| Lysyl oxidase-like 2 delta e13 OS=Homo sapiens GN=LOXL2 PE=2 SV=1                                                                                                                | LOXL2          | 81 kDa  | 0.0048 | INF  | Fibro-BKO high, Fibro-Naive low | 0  | 0  | 16  | 15  |
| cDNA FLJ57752 OS=Homo sapiens PE=2 SV=1                                                                                                                                          |                | 19 kDa  | 0.2    | 0    | 0                               | 3  | 1  | 0   | 0   |
| MS-D3 heavy chain variable region (Fragment) OS=Homo sapiens PE=2 SV=1                                                                                                           |                | 15 kDa  | 0.079  | INF  | 0                               | 0  | 0  | 1   | 2   |
| cDNA FLJ56668, highly similar to Nucleolar protein NOP5 OS=Homo sapiens PE=2 SV=1                                                                                                |                | 16 kDa  | 0.081  | 0    | 0                               | 1  | 2  | 0   | 0   |
| MHC class I antigen (Fragment) OS=Homo sapiens GN=HLA-B PE=3 SV=1                                                                                                                | HLA-B          | 21 kDa  | 0.0014 | INF  | Fibro-BKO high, Fibro-Naive low | 0  | 0  | 5   | 5   |
| PP3856 OS=Homo sapiens PE=2 SV=1                                                                                                                                                 |                | 15 kDa  | 0.0011 | 0    | Fibro-BKO low, Fibro-Naive high | 1  | 1  | 0   | 0   |
| cDNA PSEC0016 fis, clone NT2RM1001076, highly similar to Procollagen-lysine,2-oxoglutarate 5-dioxygenase 3 (EC 1.14.11.4) OS=Homo sapiens GN=PCOLCE PE=1 SV=1                    |                | 85 kDa  | 0.051  | INF  | 0                               | 0  | 0  | 3   | 2   |
| Peripheral plasma membrane protein CASK OS=Homo sapiens GN=CASK PE=1 SV=1                                                                                                        | CASK           | 59 kDa  | 0.58   | 1.8  | 0                               | 0  | 2  | 2   | 1   |
| cDNA FLJ14219 fis, clone NT2RP3003800, highly similar to Rattus norvegicus tyrosine protein kinase pp60-c-src mRNA OS=Homo sapiens PE=2 SV=1                                     |                | 29 kDa  | 0.74   | 0.6  | 0                               | 0  | 2  | 0   | 1   |
| cDNA FLJ53366, highly similar to Probable ATP-dependent RNA helicase DDX5 (EC 3.6.1.-) OS=Homo sapiens PE=2 SV=1                                                                 |                | 68 kDa  | 0.11   | 0    | 0                               | 4  | 2  | 0   | 0   |
| Telomerase protein component 1 OS=Homo sapiens GN=TEP1 PE=1 SV=1                                                                                                                 | TEP1           | 167 kDa | 0.49   | 0.4  | 0                               | 1  | 5  | 0   | 2   |
| Haptoglobin OS=Homo sapiens GN=HP PE=1 SV=1                                                                                                                                      | HP             | 38 kDa  | 0.17   | INF  | 0                               | 0  | 0  | 1   | 3   |
| cDNA FLJ55960, highly similar to Protein transport protein Sec23A OS=Homo sapiens PE=2 SV=1                                                                                      |                | 74 kDa  | 0.42   | 0    | 0                               | 2  | 0  | 0   | 0   |
| Ubiquitin-like 3, isoform CRA_a OS=Homo sapiens GN=UBL3 PE=4 SV=1                                                                                                                | UBL3           | 13 kDa  | 0.42   | 0    | 0                               | 0  | 2  | 0   | 0   |
| Paraspeckle component 1, isoform CRA_b OS=Homo sapiens GN=PSPC1 PE=4 SV=1                                                                                                        | PSPC1          | 46 kDa  | 0.42   | 0    | 0                               | 2  | 0  | 0   | 0   |
| cDNA, FLJ95208, highly similar to Homo sapiens PYD and CARD domain containing (PYCARD), transcript variant 1, mRNA OS=Homo sapiens GN=PYD PE=1 SV=1                              |                | 22 kDa  | 0.42   | 0    | 0                               | 0  | 2  | 0   | 0   |
| Out at first protein homolog OS=Homo sapiens GN=OAF PE=1 SV=1                                                                                                                    | OAF            | 18 kDa  | 0.42   | 0    | 0                               | 2  | 0  | 0   | 0   |
| Myosin-reactive immunoglobulin light chain variable region (Fragment) OS=Homo sapiens PE=2 SV=1                                                                                  |                | 12 kDa  | 0.42   | INF  | 0                               | 0  | 0  | 0   | 2   |
| Apolipoprotein L 1, isoform CRA_b OS=Homo sapiens GN=APOL1 PE=4 SV=1                                                                                                             | APOL1          | 46 kDa  | 0.42   | INF  | 0                               | 0  | 0  | 0   | 2   |
| Solute carrier family 39 (Zinc transporter), member 14, isoform CRA_a (Fragment) OS=Homo sapiens GN=SLC39A14 PE=1 SV=1                                                           | SLC39A14       | 53 kDa  | 0.42   | INF  | 0                               | 0  | 0  | 2   | 0   |
| C-type lectin domain family 3 member A OS=Homo sapiens GN=CLEC3A PE=1 SV=1                                                                                                       | CLEC3A         | 23 kDa  | 0.42   | 0    | 0                               | 2  | 0  | 0   | 0   |
| ATPase, H+ transporting, lysosomal 13kDa, V1 subunit G1, isoform CRA_a OS=Homo sapiens GN=ATP6V1G1 PE=4 SV=1                                                                     | ATP6V1G1       | 14 kDa  | 0.42   | 0    | 0                               | 0  | 2  | 0   | 0   |
| cDNA FLJ57597 OS=Homo sapiens PE=2 SV=1                                                                                                                                          |                | 89 kDa  | 0.42   | 0    | 0                               | 2  | 0  | 0   | 0   |
| Mitochondrial ribosomal protein L49, isoform CRA_b OS=Homo sapiens GN=MRPL49 PE=4 SV=1                                                                                           | MRPL49         | 19 kDa  | 0.42   | 0    | 0                               | 2  | 0  | 0   | 0   |
| Basic leucine zipper and W2 domains 2, isoform CRA_a OS=Homo sapiens GN=BZW2 PE=4 SV=1                                                                                           | BZW2           | 48 kDa  | 0.42   | 0    | 0                               | 0  | 2  | 0   | 0   |
| 1-phosphatidylinositol 4,5-bisphosphate phosphodiesterase delta-3 (Fragment) OS=Homo sapiens GN=PLCD3 PE=1 SV=1                                                                  | PLCD3          | 12 kDa  | 0.42   | INF  | 0                               | 0  | 0  | 2   | 0   |
| Ig heavy chain variable region (Fragment) OS=Homo sapiens PE=2 SV=1                                                                                                              |                | 13 kDa  | 0.42   | INF  | 0                               | 0  | 0  | 0   | 2   |

|                                                                                                                    |               |         |        |     |                                 |    |    |    |    |
|--------------------------------------------------------------------------------------------------------------------|---------------|---------|--------|-----|---------------------------------|----|----|----|----|
| EF-hand domain family, member D2, isoform CRA_a OS=Homo sapiens GN=EFHD2 PE=2 SV=1                                 | EFHD2         | 27 kDa  | 0.42   | 0   | 0                               | 2  | 0  | 0  | 0  |
| Tyrosine--tRNA ligase (Fragment) OS=Homo sapiens GN=YARS PE=2 SV=1                                                 | YARS          | 59 kDa  | 0.42   | 0   | 0                               | 2  | 0  | 0  | 0  |
| cDNA FLJ51537, highly similar to Myosin heavy chain, skeletal muscle, adult 2 (Fragment) OS=Homo sapiens PE=2 SV=1 |               | 96 kDa  | 0.42   | INF | 0                               | 0  | 0  | 2  | 0  |
| Receptor-type tyrosine-protein phosphatase kappa OS=Homo sapiens GN=PTPRK PE=1 SV=1                                | PTPRK         | 166 kDa | 0.016  | 3   | Fibro-BKO high, Fibro-Naive low | 4  | 4  | 11 | 10 |
| Mutant receptor type protein tyrosine phosphatase K OS=Homo sapiens GN=PTPRK PE=2 SV=1                             | PTPRK         | 162 kDa | 0.016  | 3   | Fibro-BKO high, Fibro-Naive low | 4  | 4  | 11 | 10 |
| Tubulin beta chain OS=Homo sapiens PE=2 SV=1                                                                       |               | 47 kDa  | 0.35   | 0.8 | 0                               | 75 | 63 | 43 | 58 |
| Filamin-A OS=Homo sapiens GN=FLNA PE=1 SV=1                                                                        | FLNA          | 277 kDa | 0.0059 | 8.2 | Fibro-BKO high, Fibro-Naive low | 3  | 10 | 46 | 47 |
| Testicular secretory protein Li 42 OS=Homo sapiens PE=2 SV=1                                                       |               | 49 kDa  | 0.75   | 1.1 | 0                               | 9  | 5  | 7  | 7  |
| Catenin (Cadherin-associated protein), alpha 1, 102kDa, isoform CRA_a OS=Homo sapiens GN=CTNNA1 PE=1 SV=1          | CTNNA1        | 93 kDa  | 0.11   | 1.3 | 0                               | 45 | 57 | 55 | 65 |
| MHC class I antigen (Fragment) OS=Homo sapiens GN=HLA-A PE=3 SV=1                                                  | HLA-A         | 36 kDa  | 0.43   | 0.6 | 0                               | 14 | 19 | 4  | 15 |
| cDNA FLJ53427, highly similar to Galectin-3-binding protein OS=Homo sapiens PE=2 SV=1                              |               | 52 kDa  | 0.27   | 1.2 | 0                               | 66 | 65 | 70 | 64 |
| Filamin-B OS=Homo sapiens GN=FLNB PE=1 SV=1                                                                        | FLNB          | 256 kDa | 0.23   | 0.3 | 0                               | 10 | 26 | 4  | 5  |
| cDNA FLJ53214, highly similar to Tubulointerstitial nephritis antigen-like OS=Homo sapiens PE=2 SV=1               |               | 44 kDa  | 0.85   | 1.1 | 0                               | 14 | 6  | 10 | 9  |
| cDNA FLJ50996, highly similar to 60S ribosomal protein L4 OS=Homo sapiens PE=2 SV=1                                |               | 46 kDa  | 0.041  | 0.4 | Fibro-BKO low, Fibro-Naive high | 14 | 13 | 6  | 4  |
| cDNA FLJ58784, highly similar to T-complex protein 1 subunit epsilon OS=Homo sapiens PE=2 SV=1                     |               | 57 kDa  | 0.0083 | 0.5 | Fibro-BKO low, Fibro-Naive high | 26 | 27 | 12 | 12 |
| Erbin OS=Homo sapiens GN=ERBIN PE=1 SV=1                                                                           | ERBIN         | 69 kDa  | 0.85   | 1.1 | 0                               | 1  | 6  | 3  | 4  |
| Harvey rat sarcoma viral oncoprotein isoform A (Fragment) OS=Homo sapiens GN=HRAS PE=2 SV=1                        | HRAS          | 21 kDa  | 0.0082 | 0.6 | Fibro-BKO low, Fibro-Naive high | 4  | 4  | 2  | 2  |
| cDNA FLJ5458, highly similar to Programmed cell death 6-interacting protein OS=Homo sapiens PE=2 SV=1              |               | 76 kDa  | 0.28   | 1.2 | 0                               | 37 | 48 | 44 | 43 |
| Aminoacyl tRNA synthase complex-interacting multifunctional protein 2 OS=Homo sapiens GN=AIMP2 PE=1 SV=2           | AIMP2         | 27 kDa  | 0.18   | 0.4 | 0                               | 8  | 5  | 3  | 1  |
| V-Ki-ras2 Kirsten rat sarcoma viral oncogene homolog, isoform CRA_b OS=Homo sapiens GN=KRAS PE=1 SV=1              | KRAS          | 21 kDa  | 0.74   | 0.7 | 0                               | 3  | 3  | 0  | 4  |
| Tubulin beta chain OS=Homo sapiens GN=TUBB6 PE=2 SV=1                                                              | TUBB6         | 50 kDa  | 0.15   | 0.7 | 0                               | 34 | 32 | 17 | 25 |
| MHC class I antigen (Fragment) OS=Homo sapiens GN=HLA B PE=3 SV=1                                                  | HLA           | 32 kDa  | 0.37   | 0.7 | 0                               | 6  | 8  | 3  | 6  |
| MHC class I antigen (Fragment) OS=Homo sapiens GN=HLA-A PE=4 SV=2                                                  | HLA-A         | 23 kDa  | 0.35   | 0.7 | 0                               | 11 | 12 | 4  | 10 |
| HCG1985580, isoform CRA_c OS=Homo sapiens GN=PDCD6 PE=1 SV=1                                                       | PDCD6         | 14 kDa  | 0.89   | 1   | 0                               | 8  | 7  | 7  | 6  |
| MHC class I antigen (Fragment) OS=Homo sapiens GN=HLA-A PE=3 SV=1                                                  | HLA-A         | 38 kDa  | 0.74   | 0.8 | 0                               | 11 | 13 | 4  | 14 |
| Elongation factor 1-alpha 1 OS=Homo sapiens GN=PTI-1 PE=2 SV=1                                                     | PTI-1         | 43 kDa  | 0.12   | 1.6 | 0                               | 10 | 7  | 11 | 12 |
| cDNA FLJ58476, highly similar to Poly(rC)-binding protein 2 OS=Homo sapiens PE=2 SV=1                              |               | 32 kDa  | 0.38   | 0.5 | 0                               | 5  | 2  | 1  | 2  |
| UBE2L3/KRAS fusion protein OS=Homo sapiens PE=2 SV=1                                                               |               | 34 kDa  | 0.49   | 0.5 | 0                               | 3  | 3  | 0  | 3  |
| Tubulin beta chain OS=Homo sapiens GN=TUBB8 PE=1 SV=1                                                              | TUBB8         | 46 kDa  | 0.92   | 1   | 0                               | 19 | 12 | 11 | 16 |
| PLXNB2 protein (Fragment) OS=Homo sapiens GN=PLXNB2 PE=2 SV=1                                                      | PLXNB2        | 32 kDa  | 0.39   | 1.3 | 0                               | 4  | 6  | 6  | 5  |
| ERBB2IP protein OS=Homo sapiens GN=ERBB2IP PE=2 SV=1                                                               | ERBB2IP       | 154 kDa | 0.99   | 1   | 0                               | 1  | 6  | 3  | 3  |
| Sodium/potassium-transporting ATPase subunit alpha OS=Homo sapiens PE=2 SV=1                                       |               | 108 kDa | 0.23   | 0.9 | 0                               | 14 | 16 | 12 | 11 |
| Putative uncharacterized protein DKFZp686O1117 OS=Homo sapiens GN=DKFZp686O1117 PE=2 SV=1                          | DKFZp686O1117 | 83 kDa  | 0.0033 | 0   | Fibro-BKO low, Fibro-Naive high | 10 | 12 | 0  | 0  |
| MHC class I antigen (Fragment) OS=Homo sapiens GN=HLA-B PE=3 SV=1                                                  | HLA-B         | 32 kDa  | 0.94   | 1.1 | 0                               | 3  | 6  | 0  | 9  |
| MHC class I antigen (Fragment) OS=Homo sapiens GN=HLA-B PE=3 SV=1                                                  | HLA-B         | 38 kDa  | 0.82   | 0.8 | 0                               | 5  | 9  | 0  | 10 |
| SEC13-like 1 isoform b variant (Fragment) OS=Homo sapiens PE=2 SV=1                                                |               | 36 kDa  | 0.77   | 0.7 | 0                               | 1  | 2  | 0  | 2  |
| Tumor susceptibility gene 101, isoform CRA_a OS=Homo sapiens GN=TSG101 PE=4 SV=1                                   | TSG101        | 29 kDa  | 0.23   | 0.6 | 0                               | 4  | 4  | 1  | 3  |
| Urokinase plasminogen activator surface receptor (Fragment) OS=Homo sapiens GN=PLAUR PE=1 SV=1                     | PLAUR         | 25 kDa  | 0.37   | 2.2 | 0                               | 1  | 1  | 1  | 3  |
| Heat shock cognate 71 kDa protein OS=Homo sapiens GN=HSPA8 PE=1 SV=1                                               | HSPA8         | 45 kDa  | 0.21   | 0.8 | 0                               | 27 | 33 | 23 | 22 |
| Cullin 4B, isoform CRA_e OS=Homo sapiens GN=CUL4B PE=1 SV=1                                                        | CUL4B         | 103 kDa | 0.2    | 0   | 0                               | 3  | 1  | 0  | 0  |
| Procollagen-lysine,2-oxoglutarate 5-dioxygenase 3 (Fragment) OS=Homo sapiens GN=PLOD3 PE=1 SV=1                    | PLOD3         | 31 kDa  | 0.051  | INF | 0                               | 0  | 0  | 3  | 2  |
| cDNA FLJ51409, highly similar to Thrombospondin-4 OS=Homo sapiens PE=2 SV=1                                        |               | 96 kDa  | 0.11   | INF | 0                               | 0  | 0  | 2  | 1  |
| Synaptophysin-like 1, isoform CRA_a OS=Homo sapiens GN=SYPL PE=4 SV=1                                              | SYPL          | 29 kDa  | 0.42   | 0   | 0                               | 0  | 2  | 0  | 0  |
| Reticulon OS=Homo sapiens GN=NOGOC PE=2 SV=1                                                                       | NOGOC         | 22 kDa  | 0.6    | 1.6 | 0                               | 6  | 0  | 4  | 5  |
| Collagen, type XII, alpha 1 OS=Homo sapiens GN=COL12A1 PE=2 SV=1                                                   | COL12A1       | 206 kDa | 0.0015 | INF | Fibro-BKO high, Fibro-Naive low | 0  | 0  | 55 | 64 |
| Keratin, type I cytoskeletal 19 (Fragment) OS=Homo sapiens GN=KRT19 PE=1 SV=1                                      | KRT19         | 21 kDa  | 0.0011 | 0   | Fibro-BKO low, Fibro-Naive high | 3  | 3  | 0  | 0  |
| EEF1A protein (Fragment) OS=Homo sapiens GN=EEF1A PE=2 SV=1                                                        | EEF1A         | 24 kDa  | 0.4    | 0.5 | 0                               | 6  | 6  | 5  | 0  |
| MHC class I antigen (Fragment) OS=Homo sapiens GN=HLA-B PE=3 SV=1                                                  | HLA-B         | 21 kDa  | 0.017  | 0   | Fibro-BKO low, Fibro-Naive high | 5  | 7  | 0  | 0  |
| cDNA FLJ51269, highly similar to Aminopeptidase N (EC 3.4.11.2) OS=Homo sapiens PE=2 SV=1                          |               | 56 kDa  | 0.013  | INF | Fibro-BKO high, Fibro-Naive low | 0  | 0  | 11 | 15 |
| MHC class I antigen (Fragment) OS=Homo sapiens GN=HLA-B PE=3 SV=1                                                  | HLA-B         | 21 kDa  | 0.94   | 1.1 | 0                               | 0  | 3  | 0  | 3  |
| MHC class I antigen (Fragment) OS=Homo sapiens GN=HLA-A PE=3 SV=1                                                  | HLA-A         | 21 kDa  | 0.35   | 0.4 | 0                               | 8  | 12 | 0  | 8  |
| cDNA FLJ51311 OS=Homo sapiens PE=2 SV=1                                                                            |               | 10 kDa  | 0.31   | 0.4 | 0                               | 1  | 2  | 0  | 1  |
| GCT-A9 light chain variable region (Fragment) OS=Homo sapiens PE=2 SV=1                                            |               | 12 kDa  | 0.17   | INF | 0                               | 0  | 0  | 1  | 3  |
| Lipolysis-stimulated lipoprotein receptor (Fragment) OS=Homo sapiens GN=LSR PE=1 SV=3                              | LSR           | 15 kDa  | 0.42   | 0   | 0                               | 4  | 0  | 0  | 0  |
| Haptoglobin-related protein OS=Homo sapiens GN=HPR PE=1 SV=1                                                       | HPR           | 13 kDa  | 0.42   | INF | 0                               | 0  | 0  | 0  | 3  |
| A30 (Fragment) OS=Homo sapiens PE=4 SV=1                                                                           |               | 10 kDa  | 0.079  | INF | 0                               | 0  | 0  | 1  | 2  |
| Putative uncharacterized protein DKFZp564O1822 (Fragment) OS=Homo sapiens GN=DKFZp564O1822 PE=2 SV=1               | DKFZp564O1822 | 42 kDa  | 0.42   | INF | 0                               | 0  | 0  | 0  | 2  |
| Signal transducer and activator of transcription 1-alpha/beta OS=Homo sapiens GN=STAT1 PE=1 SV=1                   | STAT1         | 23 kDa  | 0.64   | 2.4 | 0                               | 0  | 1  | 2  | 0  |
| Non-muscle myosin heavy chain (Fragment) OS=Homo sapiens PE=2 SV=1                                                 |               | 24 kDa  | 0.42   | 0   | 0                               | 0  | 6  | 0  | 0  |

|                                                                                                                                             |        |         |      |     |   |   |   |   |   |
|---------------------------------------------------------------------------------------------------------------------------------------------|--------|---------|------|-----|---|---|---|---|---|
| SFRS protein kinase 2, isoform CRA_b OS=Homo sapiens GN=SRPK2 PE=4 SV=1                                                                     | SRPK2  | 78 kDa  | 0.42 | 0   | 0 | 0 | 1 | 0 | 0 |
| EEF1A1 protein (Fragment) OS=Homo sapiens GN=EEF1A1 PE=2 SV=1                                                                               | EEF1A1 | 17 kDa  | 0.42 | 0   | 0 | 0 | 1 | 0 | 0 |
| 26S proteasome non-ATPase regulatory subunit 6 (Fragment) OS=Homo sapiens GN=PSMD6 PE=1 SV=1                                                | PSMD6  | 17 kDa  | 0.42 | 0   | 0 | 0 | 2 | 0 | 0 |
| HLA class I histocompatibility antigen, alpha chain G OS=Homo sapiens GN=HLA-G PE=1 SV=1                                                    | HLA-G  | 28 kDa  | 0.42 | 0   | 0 | 0 | 3 | 0 | 0 |
| Protein 4.1 (Fragment) OS=Homo sapiens GN=EPB41 PE=1 SV=1                                                                                   | EPB41  | 55 kDa  | 0.42 | 0   | 0 | 0 | 4 | 0 | 0 |
| cDNA FLJ76209, highly similar to Homo sapiens inorganic pyrophosphatase 2 (PPA2), transcript variant 2, mRNA OS=Homo sapiens PE=2 SV=1      |        | 32 kDa  | 0.42 | 0   | 0 | 2 | 0 | 0 | 0 |
| cDNA FLJ78437, highly similar to Homo sapiens cartilage oligomeric matrix protein (COMP), mRNA OS=Homo sapiens PE=2 SV=1                    |        | 83 kDa  | 0.42 | INF | 0 | 0 | 0 | 3 | 0 |
| Importin subunit alpha OS=Homo sapiens PE=2 SV=1                                                                                            |        | 60 kDa  | 0.42 | 0   | 0 | 0 | 2 | 0 | 0 |
| 2-oxoglutarate dehydrogenase, mitochondrial OS=Homo sapiens GN=OGDH PE=1 SV=1                                                               | OGDH   | 113 kDa | 0.17 | 0   | 0 | 1 | 3 | 0 | 0 |
| Ig heavy chain variable region (Fragment) OS=Homo sapiens PE=2 SV=1                                                                         |        | 14 kDa  | 0.42 | INF | 0 | 0 | 0 | 0 | 2 |
| ABC transporter MOAT-B isoform (Fragment) OS=Homo sapiens GN=MOAT-B PE=2 SV=1                                                               | MOAT-B | 100 kDa | 0.42 | 0   | 0 | 0 | 2 | 0 | 0 |
| G gamma globin chain OS=Homo sapiens GN=HBG2 PE=3 SV=1                                                                                      | HBG2   | 16 kDa  | 0.42 | 0   | 0 | 2 | 0 | 0 | 0 |
| MHC class I antigen (Fragment) OS=Homo sapiens GN=HLA-C PE=3 SV=1                                                                           | HLA-C  | 21 kDa  | 0.42 | INF | 0 | 0 | 0 | 2 | 0 |
| cDNA FLJ42166 fis, clone THYMU2019210, highly similar to HLA class I histocompatibility antigen, B-40 alpha chain OS=Homo sapiens PE=2 SV=1 |        | 48 kDa  | 0.76 | 1.7 | 0 | 0 | 6 | 0 | 9 |
| cDNA FLJ77042, highly similar to Homo sapiens ATP-binding cassette, sub-family C (CFTR/MRP), member 4, mRNA OS=Homo sapiens PE=2 SV=1       |        | 97 kDa  | 0.42 | 0   | 0 | 0 | 1 | 0 | 0 |
| MHC class I antigen (Fragment) OS=Homo sapiens GN=HLA-C PE=3 SV=1                                                                           | HLA-C  | 21 kDa  | 0.42 | 0   | 0 | 0 | 4 | 0 | 0 |
| cDNA FLJ52936, weakly similar to Tropomyosin alpha-4 chain OS=Homo sapiens PE=2 SV=1                                                        |        | 18 kDa  | 0.42 | INF | 0 | 0 | 0 | 1 | 0 |
| MHC class I antigen (Fragment) OS=Homo sapiens GN=HLA-C PE=3 SV=1                                                                           | HLA-C  | 21 kDa  | 0.42 | 0   | 0 | 0 | 4 | 0 | 0 |
| Rho-associated protein kinase 1 OS=Homo sapiens GN=ROCK1 PE=1 SV=1                                                                          | ROCK1  | 133 kDa | 1    | INF | 0 | 0 | 0 | 0 | 0 |
| cDNA FLJ54081, highly similar to Keratin, type II cytoskeletal 5 OS=Homo sapiens PE=2 SV=1                                                  |        | 59 kDa  | 0.42 | INF | 0 | 0 | 0 | 0 | 3 |
| Truncated MHC class I antigen (Fragment) OS=Homo sapiens GN=HLA-B PE=4 SV=1                                                                 | HLA-B  | 13 kDa  | 0.42 | INF | 0 | 0 | 0 | 1 | 0 |
| MHC class I antigen (Fragment) OS=Homo sapiens GN=HLA-C PE=3 SV=1                                                                           | HLA-C  | 21 kDa  | 0.42 | 0   | 0 | 3 | 0 | 0 | 0 |
| Immunoglobulin heavy chain variable region (Fragment) OS=Homo sapiens PE=4 SV=1                                                             |        | 15 kDa  | 0.42 | INF | 0 | 0 | 0 | 0 | 1 |
| Actin-like protein (Fragment) OS=Homo sapiens GN=ACT PE=4 SV=1                                                                              | ACT    | 12 kDa  | 0.42 | INF | 0 | 0 | 0 | 4 | 0 |
| cDNA FLJ52207, highly similar to HLA class I histocompatibility antigen, B-7 alpha chain OS=Homo sapiens PE=2 SV=1                          |        | 23 kDa  | 0.42 | 0   | 0 | 0 | 2 | 0 | 0 |
| Disco-interacting protein 2 homolog C OS=Homo sapiens GN=DIP2C PE=1 SV=1                                                                    | DIP2C  | 178 kDa | 0.42 | INF | 0 | 0 | 0 | 1 | 0 |
| MHC class I antigen (Fragment) OS=Homo sapiens GN=HLA-B PE=3 SV=1                                                                           | HLA-B  | 21 kDa  | 0.42 | INF | 0 | 0 | 0 | 0 | 5 |
| RAB6B protein OS=Homo sapiens GN=RAB6B PE=2 SV=1                                                                                            | RAB6B  | 23 kDa  | 1    | INF | 0 | 0 | 0 | 0 | 0 |
| Serine/threonine-protein kinase 26 OS=Homo sapiens GN=STK26 PE=1 SV=1                                                                       | STK26  | 49 kDa  | 1    | INF | 0 | 0 | 0 | 0 | 0 |
