# Supplementary material for: Exosomes isolated from cancer patients’ sera transfer malignant traits and confer the same phenotype of primary tumors to oncosuppressor-mutated cells
Source: Springer Nature journal article supplement (doi:10.1186/s13046-017-0587-0), 2017-08-30
Supplement: MOESM6 [file 14956656]

**Supplementary Table 6. Exosome proteins involved in microvesicles uptake (Ligands for the receptors determined by MS on fibroblasts plasma membrane)\***

| Identified Proteins                                                                                     | Alternate Name | MW      | T-Test (p-value) | Fold Change | Quantitative Profile            | Control |    | BRCA1-KO |     | Reported in Exocarta |
|---------------------------------------------------------------------------------------------------------|----------------|---------|------------------|-------------|---------------------------------|---------|----|----------|-----|----------------------|
|                                                                                                         |                |         |                  |             |                                 | 1       | 2  | 1        | 2   |                      |
| Laminin, gamma 1 (Formerly LAMB2), isoform CRA_a OS=Homo sapiens GN=LAMC1 PE=4 SV=1                     | LAMC1          | 174 kDa | 0.0047           | 67          | Fibro-BKO high, Fibro-Naive low | 0       | 1  | 26       | 32  | yes                  |
| Laminin subunit beta-1 OS=Homo sapiens GN=LAMB1 PE=1 SV=1                                               | LAMB1          | 200 kDa | 0.0083           | INF         | Fibro-BKO high, Fibro-Naive low | 0       | 0  | 17       | 22  | yes                  |
| Laminin, beta 2 (Laminin S), isoform CRA_a OS=Homo sapiens GN=LAMB2 PE=4 SV=1                           | LAMB2          | 196 kDa | 0.0014           | INF         | Fibro-BKO high, Fibro-Naive low | 0       | 0  | 5        | 6   | yes                  |
| Laminin subunit alpha-2 OS=Homo sapiens GN=LAMA2 PE=1 SV=1                                              | LAMA2          | 344 kDa | 0.079            | INF         | []                              | 0       | 0  | 1        | 2   | no                   |
| Laminin subunit alpha-4 OS=Homo sapiens GN=LAMA4 PE=1 SV=1                                              | LAMA4          | 203 kDa | 0.0019           | INF         | Fibro-BKO high, Fibro-Naive low | 0       | 0  | 17       | 20  | yes                  |
| Laminin, alpha 4, isoform CRA_b OS=Homo sapiens GN=LAMA4 PE=4 SV=1                                      | LAMA4          | 202 kDa | 0.0001           | INF         | Fibro-BKO high, Fibro-Naive low | 0       | 0  | 18       | 19  | yes                  |
| Thrombospondin 1, isoform CRA_a OS=Homo sapiens GN=THBS1 PE=4 SV=1                                      | THBS1          | 129 kDa | 0.0076           | 21          | Fibro-BKO high, Fibro-Naive low | 4       | 10 | 130      | 119 | yes                  |
| cDNA FLJ51409, highly similar to Thrombospondin-4 OS=Homo sapiens PE=2 SV=1                             |                | 96 kDa  | 0.11             | INF         | []                              | 0       | 0  | 2        | 1   | yes                  |
| Fibronectin 1, isoform CRA_n OS=Homo sapiens GN=FN1 PE=4 SV=1                                           | FN1            | 259 kDa | 0.001            | 44          | Fibro-BKO high, Fibro-Naive low | 11      | 25 | 676      | 688 | yes                  |
| Fibronectin (Fragment) OS=Homo sapiens GN=FN1 PE=1 SV=1                                                 | FN1            | 121 kDa | 0.0012           | 52          | Fibro-BKO high, Fibro-Naive low | 7       | 14 | 480      | 484 | yes                  |
| Collagen alpha-1(VI) chain OS=Homo sapiens GN=COL6A1 PE=1 SV=1                                          | COL6A1         | 108 kDa | 0.015            | 14          | Fibro-BKO high, Fibro-Naive low | 3       | 3  | 41       | 35  | yes                  |
| Collagen alpha-1(XII) chain OS=Homo sapiens GN=COL12A1 PE=1 SV=1                                        | COL12A1        | 333 kDa | 0.00087          | INF         | Fibro-BKO high, Fibro-Naive low | 0       | 0  | 84       | 96  | yes                  |
| Collagen alpha-2(I) chain OS=Homo sapiens GN=COL1A2 PE=1 SV=1                                           | COL1A2         | 129 kDa | 0.0016           | INF         | Fibro-BKO high, Fibro-Naive low | 0       | 0  | 30       | 35  | yes                  |
| Collagen, type VI, alpha 3 OS=Homo sapiens GN=COL6A3 PE=4 SV=1                                          | COL6A3         | 344 kDa | 0.00011          | 97          | Fibro-BKO high, Fibro-Naive low | 0       | 5  | 200      | 213 | yes                  |
| Collagen, type I, alpha 1, isoform CRA_a OS=Homo sapiens GN=COL1A1 PE=4 SV=1                            | COL1A1         | 85 kDa  | 0.0029           | INF         | Fibro-BKO high, Fibro-Naive low | 0       | 0  | 25       | 30  | yes                  |
| Collagen alpha-1(I) chain preproprotein OS=Homo sapiens GN=COL1A1 PE=2 SV=1                             | COL1A1         | 100 kDa | 0.021            | INF         | Fibro-BKO high, Fibro-Naive low | 0       | 0  | 22       | 32  | yes                  |
| Collagen, type XVIII, alpha 1, isoform CRA_d OS=Homo sapiens GN=COL18A1 PE=4 SV=1                       | COL18A1        | 136 kDa | 0.29             | 3.1         | []                              | 0       | 4  | 5        | 11  | yes                  |
| Procollagen C-endopeptidase enhancer OS=Homo sapiens GN=PCOLCE PE=4 SV=1                                | PCOLCE         | 48 kDa  | 0.026            | INF         | Fibro-BKO high, Fibro-Naive low | 0       | 0  | 4        | 6   | yes                  |
| Collagen alpha-2(VI) chain (Fragment) OS=Homo sapiens GN=COL6A2 PE=1 SV=1                               | COL6A2         | 20 kDa  | 0.021            | INF         | Fibro-BKO high, Fibro-Naive low | 0       | 0  | 5        | 4   | yes                  |
| COL6A2 protein OS=Homo sapiens PE=2 SV=1                                                                |                | 47 kDa  | 0.0025           | 33          | Fibro-BKO high, Fibro-Naive low | 0       | 1  | 14       | 14  | yes                  |
| COL6A3 protein OS=Homo sapiens GN=COL6A3 PE=2 SV=1                                                      | COL6A3         | 278 kDa | 0.0003           | 84          | Fibro-BKO high, Fibro-Naive low | 0       | 5  | 175      | 184 | yes                  |
| Collagen alpha-2(VI) chain (Fragment) OS=Homo sapiens GN=COL6A2 PE=1 SV=1                               | COL6A2         | 26 kDa  | 0.051            | INF         | []                              | 0       | 0  | 3        | 2   | yes                  |
| Procollagen-lysine 1, 2-oxoglutarate 5-dioxygenase 1, isoform CRA_a OS=Homo sapiens GN=PLOD1 PE=1 SV=1  | PLOD1          | 84 kDa  | 0.57             | 3.4         | []                              | 1       | 0  | 3        | 0   | yes                  |
| Collagen, type XII, alpha 1 OS=Homo sapiens GN=COL12A1 PE=2 SV=1                                        | COL12A1        | 206 kDa | 0.0015           | INF         | Fibro-BKO high, Fibro-Naive low | 0       | 0  | 55       | 64  | yes                  |
| Milk fat globule-EGF factor 8 protein, isoform CRA_a OS=Homo sapiens GN=MFG8 PE=4 SV=1                  | MFG8           | 43 kDa  | 0.00013          | 6.5         | Fibro-BKO high, Fibro-Naive low | 12      | 13 | 67       | 74  | yes                  |
| Protocadherin Fat 1 OS=Homo sapiens GN=FAT1 PE=1 SV=1                                                   | FAT1           | 506 kDa | 0.0067           | 9.4         | Fibro-BKO high, Fibro-Naive low | 2       | 6  | 30       | 33  | yes                  |
| Cadherin-1 OS=Homo sapiens GN=CDH1 PE=1 SV=1                                                            | CDH1           | 100 kDa | 0.77             | 0.9         | []                              | 10      | 8  | 6        | 9   | yes                  |
| cDNA FLJ77464, highly similar to Homo sapiens protocadherin 1 (cadherin-like 1) (PCDH1), transcript var |                | 115 kDa | 0.042            | 2.9         | Fibro-BKO high, Fibro-Naive low | 3       | 2  | 7        | 6   | yes                  |
| Tenascin C (Hexabrachion), isoform CRA_a OS=Homo sapiens GN=TNC PE=4 SV=1                               | TNC            | 241 kDa | 0.00028          | INF         | Fibro-BKO high, Fibro-Naive low | 0       | 0  | 44       | 49  | yes                  |
| Tenascin OS=Homo sapiens GN=TNC PE=1 SV=1                                                               | TNC            | 221 kDa | 0.00024          | INF         | Fibro-BKO high, Fibro-Naive low | 0       | 0  | 45       | 50  | yes                  |
| Gamma filamin variant (Fragment) OS=Homo sapiens PE=2 SV=1                                              |                | 143 kDa | 0.0015           | 27          | Fibro-BKO high, Fibro-Naive low | 1       | 0  | 12       | 13  | yes                  |
| Filamin B, beta (Actin binding protein 278), isoform CRA_a OS=Homo sapiens GN=FLNB PE=4 SV=1            | FLNB           | 280 kDa | 0.23             | 0.3         | []                              | 12      | 29 | 6        | 6   | yes                  |
| Filamin A OS=Homo sapiens GN=FLNA PE=1 SV=1                                                             | FLNA           | 278 kDa | 0.0067           | 8.3         | Fibro-BKO high, Fibro-Naive low | 3       | 10 | 47       | 47  | yes                  |
| Filamin-A OS=Homo sapiens GN=FLNA PE=1 SV=1                                                             | FLNA           | 277 kDa | 0.0059           | 8.2         | Fibro-BKO high, Fibro-Naive low | 3       | 10 | 46       | 47  | yes                  |
| Filamin-B OS=Homo sapiens GN=FLNB PE=1 SV=1                                                             | FLNB           | 256 kDa | 0.23             | 0.3         | []                              | 10      | 26 | 4        | 5   | yes                  |
| Integrin beta-1 (Fragment) OS=Homo sapiens GN=ITGB1 PE=1 SV=1                                           | ITGB1          | 11 kDa  | 0.3              | 1.6         | []                              | 5       | 9  | 11       | 8   | yes                  |
| Integrin alpha-2 OS=Homo sapiens GN=ITGA2 PE=1 SV=1                                                     | ITGA2          | 103 kDa | 0.98             | 1           | []                              | 18      | 35 | 22       | 25  | yes                  |
| Integrin beta-1 (Fragment) OS=Homo sapiens GN=ITGB1 PE=1 SV=1                                           | ITGB1          | 11 kDa  | 0.3              | 1.6         | []                              | 5       | 9  | 11       | 8   | yes                  |
| Collagen, type I, alpha 1, isoform CRA_a OS=Homo sapiens GN=COL1A1 PE=4 SV=1                            | COL1A1         | 85 kDa  | 0.0029           | INF         | Fibro-BKO high, Fibro-Naive low | 0       | 0  | 25       | 30  | yes                  |
| Heparan sulfate proteoglycan 2 (Perlecan), isoform CRA_b OS=Homo sapiens GN=HSPG2 PE=4 SV=1             | HSPG2          | 464 kDa | 0.015            | 9.2         | Fibro-BKO high, Fibro-Naive low | 1       | 76 | 283      | 329 | yes                  |
| Nectin-2 (Fragment) OS=Homo sapiens GN=NECTIN2 PE=1 SV=1                                                | NECTIN2        | 23 kDa  | 0.081            | 2.2         | []                              | 2       | 1  | 3        | 3   | no                   |

\*Based on:

Kelly J. McKelvey et al., 2015. Exosomes: Mechanisms of Uptake. J Circ Biomark, 4:7.

Laura Ann Mulcahy et al., 2014. Routes and mechanisms of extracellular vesicle uptake. Journal of Extracellular Vesicles 3: 24641
